# Supplementary material for: Impact of human milk on the transcriptomic response of fetal intestinal epithelial cells reveals expression changes of immune-related genes
Source: Royal Society of Chemistry journal article supplement (doi:10.1039/c8fo01107a), 2018-11-30
Supplement: c8fo01107a2.pdf [file c8fo01107a2.pdf]

Supplementary Material S1

Chemical characterization of the three individual human milk samples (A, B and C) and also of the skimmed human milk pool used for the treatment of the cells has been performed by spectrophotometry using a MilkoScan FT 6000 (FOSS). We have also quantified the bacterial load by obtaining DNA from those samples and performing specific Q-PCR for 16S rDNA amplification.

| sample                  | Fat (%w/w)  | Protein (%w/w) | Lactose (%w/w) | non fatty solids (%w/w) | Bacterial Load (copies 16S rDNA/mL) |
|-------------------------|-------------|----------------|----------------|-------------------------|-------------------------------------|
| A                       | 3.14        | 1.88           | 7.08           | 9.64                    | 2.45x10 <sup>7</sup>                |
| B                       | 2.92        | 1.86           | 6.98           | 9.58                    | 1.31x10 <sup>6</sup>                |
| C                       | 3.48        | 1.52           | 7.34           | 9.44                    | 0.84x10 <sup>6</sup>                |
| <b>skimmed pool ABC</b> | <b>0.58</b> | <b>1.72</b>    | <b>7.62</b>    | <b>9.62</b>             | 1x10 <sup>7</sup>                   |
