# Supplementary material for: Impact of human milk on the transcriptomic response of fetal intestinal epithelial cells reveals expression changes of immune-related genes
Source: Royal Society of Chemistry journal article supplement (doi:10.1039/c8fo01107a), 2018-11-30
Supplement: c8fo01107a3.xlsx [file c8fo01107a3.xlsx]

## Sheet: 005_signif_go_biol_process
#term	term_size	term_size_in_genome	annotated_genes	converged	lor	adj_pvalue
protein-DNA complex assembly(GO:0065004)	127	417	NM_018063,NM_007280,ENST00000254810,NM_018179,NM_018132,NM_144998,NM_018154,NM_001099412,ENST00000377803,NM_003011,NM_001037738,NM_021968,NM_021963,NM_001100625,NM_001100624,NM_006026,NM_012295,NM_012259,NM_012387,NM_001017991,NM_207118,NM_012330,NM_001079514,NM_022490,NM_018944,NM_006401,NM_001034077,NM_018649,NM_014034,NM_181716,NM_170589,NM_000321,NM_000346,NM_005104,NM_021648,NM_134424,NM_170…	true	0.23796	2.00486e-15
nucleosome assembly(GO:0006334)	94	297	NM_007280,ENST00000254810,NM_018132,NM_018154,NM_001099412,ENST00000377803,NM_003011,NM_001037738,NM_021968,NM_021963,NM_001100625,NM_001100624,NM_006026,NM_012295,NM_012387,NM_001017991,NM_012330,NM_001079514,NM_018944,NM_006401,NM_001034077,NM_018649,NM_014034,NM_170589,NM_000346,NM_005104,NM_021648,NM_170610,NM_016287,NM_005483,NM_000489,NM_018455,NM_018410,NM_005441,NM_014288,NM_022909,NM_005…	true	0.255959	5.06825e-15
negative regulation of pathway-restricted SMAD protein phosphorylation(GO:0060394)	10	30	NM_007178,NM_013372,NM_012242,NM_000118,NM_020182,NM_005450,NM_005585,NM_031953,NM_001191323,NM_181482	true	-0.733509	9.64364e-15
DNA conformation change(GO:0071103)	208	633	NM_004208,NM_018063,NM_014614,NM_007280,ENST00000254810,NM_004259,NM_004284,AF006514,ENST00000420326,NM_018132,ENST00000392133,NM_018154,NM_001099412,ENST00000377803,NM_001205262,NM_014865,NM_014952,NM_013449,NM_020920,NM_003011,NM_014977,NM_001005271,NM_001037738,NM_021968,NM_021963,NM_001039966,NM_001080449,NM_001100625,NM_001100624,NM_021830,NM_006026,NM_012295,NM_001185011,NM_012415,NM_012387…	true	0.198364	2.09527e-14
chromatin assembly(GO:0031497)	108	344	NM_018063,NM_007280,ENST00000254810,NM_018132,NM_018154,NM_001099412,ENST00000377803,NM_014952,NM_013449,NM_003011,NM_001037738,NM_021968,NM_021963,NM_001100625,NM_001100624,NM_006026,NM_012295,NM_012387,NM_001017991,NM_012330,NM_000077,NM_001079514,NM_018944,NM_006401,NM_001034077,NM_138804,NM_018649,NM_014034,NM_181716,NM_170589,NM_000346,NM_005104,NM_021648,NM_170610,NM_016287,NM_005483,NM_000…	true	0.23768	6.79647e-14
chromatin assembly or disassembly(GO:0006333)	134	408	NM_018063,NM_007280,ENST00000254810,NM_007192,NM_018132,NM_018154,NM_001099412,ENST00000377803,NM_014952,NM_013449,NM_003011,NM_007365,NM_003074,NM_003073,NM_003072,NM_003079,NM_003078,NM_001005271,NM_001037738,NM_021968,NM_021963,NM_006163,NM_001100625,NM_001100624,NM_006015,NM_006026,NM_012295,NM_012387,NM_001017991,NM_012330,NM_000077,NM_001079514,NM_018944,NM_006401,NM_001034077,NM_138804,NM_…	true	0.22095	1.41126e-13
DNA packaging(GO:0006323)	145	439	NM_004208,NM_018063,NM_014614,NM_007280,ENST00000254810,NM_018132,NM_018154,NM_001099412,ENST00000377803,NM_014865,NM_014952,NM_013449,NM_003011,NM_014977,NM_001037738,NM_021968,NM_021963,NM_001039966,NM_001100625,NM_001100624,NM_006026,NM_012295,NM_001185011,NM_012387,NM_001017991,NM_012330,NM_000077,NM_001079514,NM_000145,NM_018944,NM_006401,NM_001034077,NM_138804,NM_022346,NM_018649,NM_014034,…	true	0.215577	1.52756e-13
protein-DNA complex subunit organization(GO:0071824)	149	478	NM_018063,NM_014614,NM_007280,ENST00000254810,NM_018179,NM_007192,NM_018132,NM_144998,NM_018154,NM_001099412,ENST00000377803,NM_003011,NM_003074,NM_003073,NM_003072,NM_003079,NM_003078,NM_001037738,NM_021968,NM_021963,NM_006163,NM_001100625,NM_001100624,NM_006015,NM_006026,NM_012295,NM_012259,NM_207189,NM_012387,NM_001017991,NM_207118,NM_012330,NM_001079514,NM_000145,NM_022490,NM_018944,NM_006401…	true	0.210552	4.25949e-13
nucleosome organization(GO:0034728)	116	358	NM_014614,NM_007280,ENST00000254810,NM_007192,NM_018132,NM_018154,NM_001099412,ENST00000377803,NM_003011,NM_003074,NM_003073,NM_003072,NM_003079,NM_003078,NM_001037738,NM_021968,NM_021963,NM_006163,NM_001100625,NM_001100624,NM_006015,NM_006026,NM_012295,NM_207189,NM_012387,NM_001017991,NM_012330,NM_001079514,NM_000145,NM_018944,NM_006401,NM_001034077,NM_018649,NM_014034,NM_170589,NM_000346,NM_005…	true	0.220791	2.25086e-12
chromosome segregation(GO:0007059)	185	482	NM_004217,NM_004219,NM_007221,NM_012447,NM_004259,NM_018101,NM_004336,NM_018184,NM_014750,ENST00000420326,NM_144998,NM_018098,NM_001100399,NM_014865,NM_173685,NM_001257281,ENST00000394884,NM_007300,NM_020937,NM_144718,NM_001100400,NM_044472,NM_006101,NM_001100625,NM_001100624,NM_001005386,NM_001032293,NM_001039802,NM_001206999,NM_012291,NM_020675,NM_012237,NM_001136566,NM_001017975,NM_001270519,N…	true	0.189524	4.81476e-12
centromere complex assembly(GO:0034508)	42	120	NM_018063,NM_007280,NM_018132,NM_144998,ENST00000377803,NM_001037738,NM_021968,NM_001100625,NM_001100624,NM_018944,NM_001034077,NM_181716,NM_170589,NM_000321,NM_018455,NM_018410,NM_014288,NM_022909,NM_016343,NM_005610,NM_018353,NM_001199803,NM_024039,NM_002938,NM_015100,NM_022145,NM_024322,NM_001012507,NM_001809,NM_024629,NM_015571,NM_001813,NM_001812,NM_001012267,NM_003707,NM_003601,NM_003540,NM…	true	0.278885	1.69386e-11
endocytosis(GO:0006897)	485	1341	NM_004244,NM_004240,NM_173847,NM_173833,NM_007229,NM_014601,NM_007261,NM_018053,NM_007275,NM_014666,NM_172311,NM_001178126,NM_012437,NM_004292,NM_019601,NM_052870,NM_052893,NM_004327,NM_018113,NM_004343,NM_001204303,NM_004312,NM_004313,NM_014748,NM_007121,NM_007166,NM_018090,NM_001030059,NM_001278464,NM_004383,NM_001278497,NM_001257389,NM_013346,NM_013312,NM_013372,NM_014880,NM_014932,NM_00124236…	true	-0.144717	7.26961e-11
DNA-dependent DNA replication(GO:0006261)	109	261	NM_007215,NM_007254,NM_052865,NM_004359,NM_144998,NM_013347,NM_013432,NM_004111,NM_013442,NM_013448,NM_020937,NM_004153,NM_006190,NM_001080449,NM_021830,NM_006591,NM_000057,NM_130395,NM_199420,NM_000946,NM_198468,NM_017489,NM_006306,NM_017553,NM_000234,NM_006231,NM_006230,NM_181747,NM_005131,NM_021627,NM_014140,NM_181808,NM_001008537,NM_000489,NM_021073,NM_000553,NM_005445,NM_030768,NM_014321,NM_…	true	0.20921	1.40604e-10
CENP-A containing nucleosome assembly(GO:0034080)	31	69	NM_007280,NM_018132,ENST00000377803,NM_001037738,NM_021968,NM_001100625,NM_001100624,NM_018944,NM_001034077,NM_170589,NM_018455,NM_018410,NM_014288,NM_022909,NM_005610,NM_018353,NM_001199803,NM_022145,NM_024322,NM_001012507,NM_001809,NM_024629,NM_001012267,NM_003707,NM_003601,NM_003540,NM_003543,NM_003542,NM_003547,NM_175054,NM_002520	true	0.28543	2.11416e-10
CENP-A containing chromatin organization(GO:0061641)	31	69	NM_007280,NM_018132,ENST00000377803,NM_001037738,NM_021968,NM_001100625,NM_001100624,NM_018944,NM_001034077,NM_170589,NM_018455,NM_018410,NM_014288,NM_022909,NM_005610,NM_018353,NM_001199803,NM_022145,NM_024322,NM_001012507,NM_001809,NM_024629,NM_001012267,NM_003707,NM_003601,NM_003540,NM_003543,NM_003542,NM_003547,NM_175054,NM_002520	true	0.28543	2.11416e-10
chromatin remodeling at centromere(GO:0031055)	33	74	NM_018063,NM_007280,NM_018132,ENST00000377803,NM_001037738,NM_021968,NM_001100625,NM_001100624,NM_018944,NM_001034077,NM_181716,NM_170589,NM_018455,NM_018410,NM_014288,NM_022909,NM_005610,NM_018353,NM_001199803,NM_022145,NM_024322,NM_001012507,NM_001809,NM_024629,NM_001012267,NM_003707,NM_003601,NM_003540,NM_003543,NM_003542,NM_003547,NM_175054,NM_002520	true	0.280452	2.40918e-10
regulation of cardiac muscle cell differentiation(GO:2000725)	17	38	NM_004274,NM_019884,NM_013372,NM_004093,NM_012242,NM_021110,NM_000684,NM_153370,NM_001191323,NM_153026,NM_033131,NM_001146312,NM_153604,NM_002397,NM_001200,NM_001202,NM_001234	true	-0.516193	4.88844e-10
skeletal system development(GO:0001501)	412	785	NM_173849,AJ271790,NM_018055,NM_001178133,NM_001271938,NM_012432,NM_014714,NM_012464,NM_052872,NM_004329,NM_007112,NM_019558,NM_019590,NM_014740,NM_144966,NM_001204375,NM_001135243,ENST00000376332,ENST00000471755,NM_004370,NM_019885,NM_013372,NM_014918,NM_004087,NM_004072,NM_013409,NM_003030,NM_003012,NM_003013,NM_001256182,NM_001174066,NM_003068,NM_020996,NM_003036,NM_004185,NM_020839,NM_020800,…	true	-0.148302	6.63788e-10
DNA replication-dependent nucleosome organization(GO:0034723)	18	43	NM_018154,ENST00000377803,NM_021968,NM_001034077,NM_014034,NM_005483,NM_005441,NM_005610,NM_024658,NM_003642,NM_003540,NM_003536,NM_003535,NM_003543,NM_003542,NM_003547,NM_175054,NM_002482	true	0.309521	1.3959e-09
DNA replication-dependent nucleosome assembly(GO:0006335)	18	43	NM_018154,ENST00000377803,NM_021968,NM_001034077,NM_014034,NM_005483,NM_005441,NM_005610,NM_024658,NM_003642,NM_003540,NM_003536,NM_003535,NM_003543,NM_003542,NM_003547,NM_175054,NM_002482	true	0.309521	1.3959e-09
histone exchange(GO:0043486)	39	86	NM_014614,NM_007280,NM_018132,ENST00000377803,NM_001037738,NM_021968,NM_001100625,NM_001100624,NM_000145,NM_018944,NM_001034077,NM_170589,NM_170610,NM_018455,NM_018410,NM_014288,NM_022909,NM_005610,NM_018353,NM_001199803,NM_022145,NM_024322,NM_001012507,NM_001809,NM_015557,NM_024629,NM_003958,NM_001012267,NM_003707,NM_003601,NM_003540,NM_003543,NM_003542,NM_003547,NM_175054,NM_002520,NM_003284,NM…	true	0.25855	1.66836e-09
glomerulus morphogenesis(GO:0072102)	9	23	NM_014751,NM_006206,NM_000435,NM_032531,NM_001282971,NM_003206,NM_002609,NM_002397,NM_001202	true	-0.614721	2.44282e-09
ossification involved in bone maturation(GO:0043931)	14	33	NM_007112,NM_013372,NM_000230,NM_006378,NM_001142287,NM_000540,NM_000618,NM_001143804,NM_001664,NM_002673,NM_001191323,NM_003737,NM_001200,NM_002343	true	-0.525925	5.42324e-09
DNA repair(GO:0006281)	452	1582	NM_078468,NM_078469,NM_004219,NM_004238,NM_004237,NM_007215,NM_001100119,NM_007254,NM_018062,NM_014614,NM_014641,NM_014647,NM_001271933,NM_004259,NM_052865,NM_004284,NM_018124,NM_004344,NM_014736,NM_007126,NM_018193,ENST00000420326,NM_007192,ENST00000392133,NM_144998,NM_173618,NM_175871,NM_001205262,NM_001080394,NM_013342,NM_013347,NM_173627,NM_001114121,NM_001257370,NM_001256270,NM_014881,NM_014…	true	0.120142	5.65889e-09
bone maturation(GO:0070977)	16	41	NM_007112,NM_013372,NM_000142,NM_000230,NM_006378,NM_001142287,NM_000515,NM_000540,NM_000618,NM_001143804,NM_001664,NM_002673,NM_001191323,NM_003737,NM_001200,NM_002343	true	-0.50364	5.80874e-09
vesicle organization(GO:0016050)	127	313	NM_078471,NM_001030007,NM_012437,NM_007166,NM_014795,NM_014802,NM_014832,NM_013388,NM_014866,NM_020919,NM_003037,NM_004161,NM_004193,NM_001257999,NM_021982,NM_006152,NM_006113,NM_001271667,NM_001080421,NM_020783,NM_001033503,NM_020665,NM_001024948,NM_012388,NM_000081,NM_001105251,NM_001287763,NM_199444,NM_006496,NM_017516,NM_006323,NM_006364,NM_017510,NM_198098,NM_018668,NM_006292,NM_021633,NM_01…	true	-0.236101	7.44205e-09
determination of dorsal identity(GO:0048263)	10	25	NM_013372,NM_004083,NM_001278548,NM_001204088,NM_022469,NM_005454,NM_001904,NM_001191323,NM_001105,NM_003393	true	-0.57788	1.01013e-08
skeletal system morphogenesis(GO:0048705)	192	317	NM_173849,NM_018055,NM_001271938,NM_014714,NM_007112,NM_019558,NM_014740,NM_144966,ENST00000471755,NM_019885,NM_013372,NM_014918,NM_004087,NM_003030,NM_003012,NM_003013,NM_001256182,NM_001174066,NM_020996,NM_003036,NM_020839,NM_020800,NM_021926,NM_001080461,NM_001032280,NM_006007,NM_172037,NM_024915,NM_020693,NM_012201,NM_001024847,NM_000021,NM_001190839,NM_000088,NM_000095,NM_000965,NM_000966,NM…	true	-0.195691	1.02703e-08
plasma membrane organization(GO:0007009)	183	485	NM_001204404,NM_007229,NM_014600,NM_014601,NM_018053,NM_001256012,NM_018026,NM_004360,NM_014751,NM_007183,NM_001034954,NM_004383,NM_004068,NM_004087,NM_004106,NM_004114,NM_013451,NM_020922,NM_020971,NM_020987,NM_012090,NM_012096,NM_001039966,NM_174976,NM_001080435,NM_006098,NM_173570,NM_020752,NM_007052,NM_007033,NM_012249,NM_001024948,NM_013955,NM_012307,NM_012339,NM_000037,NM_020477,NM_000093,N…	true	-0.199883	1.02995e-08
cell-substrate adhesion(GO:0031589)	281	731	NM_173828,NM_014634,NM_018059,NM_012431,NM_012425,NM_001278344,NM_004333,NM_004343,NM_007112,NM_144966,NM_007124,NM_007170,NM_001099401,NM_001034954,NM_001243756,NM_001257389,NM_014875,NM_001033047,NM_013427,NM_007313,NM_003012,NM_007361,NM_020909,NM_004161,NM_004148,NM_044472,NM_020820,NM_021913,NM_013993,NM_012090,NM_006125,NM_001080435,NM_001080437,NM_021871,NM_012193,NM_012192,NM_001039802,NM…	true	-0.164091	1.19167e-08
telomere organization(GO:0032200)	81	213	NM_018081,NM_012461,NM_007110,NM_019589,ENST00000392133,ENST00000377803,NM_001080391,NM_173685,NM_004111,NM_021968,NM_020865,NM_001080449,NM_012176,NM_024928,L40403,NM_006591,NM_000051,NM_000057,NM_000946,NM_018975,NM_001034077,NM_017489,NM_000234,NM_005236,NM_017575,NM_006231,NM_006230,NM_198253,NM_000489,NM_000553,NM_006904,NM_133629,NM_001142571,NM_022836,NM_005652,NM_005590,NM_021173,NM_02114…	true	0.206815	1.37434e-08
glomerulus development(GO:0032835)	50	104	NM_014625,NM_014751,NM_020975,NM_020630,NM_012301,NM_000091,NM_000092,NM_018837,NM_020335,NM_006317,NM_005251,NM_198098,NM_014079,NM_006206,NM_017617,NM_000435,NM_018490,NM_005450,NM_000633,NM_016341,NM_000686,NM_005524,NM_014571,NM_032531,NM_001454,NM_001282971,NM_015170,NM_001613,NM_001025109,NM_030667,NM_001977,NM_001964,NM_024426,NM_003990,NM_001773,NM_001145850,NM_003870,NM_004998,NM_145260,…	true	-0.335452	1.63462e-08
telomere maintenance(GO:0000723)	79	208	NM_012461,NM_007110,NM_019589,ENST00000392133,ENST00000377803,NM_001080391,NM_173685,NM_004111,NM_021968,NM_020865,NM_001080449,NM_012176,NM_024928,L40403,NM_006591,NM_000051,NM_000057,NM_000946,NM_018975,NM_001034077,NM_017489,NM_000234,NM_005236,NM_017575,NM_006231,NM_006230,NM_198253,NM_000489,NM_000553,NM_006904,NM_133629,NM_001142571,NM_022836,NM_005652,NM_005590,NM_021173,NM_021141,NM_00660…	true	0.206699	1.89712e-08
nuclear division(GO:0000280)	493	1260	NM_004217,NM_004219,NM_004237,NM_007221,NM_007234,NM_014629,NM_018087,NM_018086,NM_018068,NM_018063,NM_007280,NM_014647,NM_012447,NM_012444,NM_001271933,NM_014708,NM_052857,NM_004259,NM_052870,NM_004354,NM_018101,NM_004365,NM_004343,NM_004344,NM_004336,NM_001114091,NM_014750,ENST00000420326,NM_018136,NM_018131,NM_014780,NM_018164,NM_144998,NM_007174,NM_057161,NM_001099402,NM_018097,NM_001205262,N…	true	0.111391	2.7411e-08
extracellular structure organization(GO:0043062)	362	799	NM_007255,NM_014654,NM_012464,NM_012465,NM_004346,NM_004360,NM_004357,NM_001204303,NM_018192,NM_014767,NM_007171,NM_147780,NM_057165,ENST00000471755,NM_004393,NM_004386,NM_004385,NM_004369,NM_004370,NM_019891,NM_013372,NM_001033047,NM_004079,NM_007308,NM_007314,NM_007313,NM_003013,NM_007361,NM_001174146,NM_001137675,NM_001037763,NM_001242607,NM_013993,NM_173465,NM_001163771,NM_021932,NM_001278939…	true	-0.142226	2.89436e-08
DNA replication-independent nucleosome organization(GO:0034724)	43	93	NM_007280,ENST00000254810,NM_018132,NM_018154,ENST00000377803,NM_001037738,NM_021968,NM_001100625,NM_001100624,NM_012295,NM_001079514,NM_018944,NM_001034077,NM_014034,NM_170589,NM_000489,NM_018455,NM_018410,NM_014288,NM_022909,NM_005610,NM_018353,NM_001199803,NM_022145,NM_024322,NM_001012507,NM_001809,NM_024629,NM_001012267,NM_024658,NM_002107,NM_003707,NM_003642,NM_003601,NM_003540,NM_003543,NM_…	true	0.236961	2.96172e-08
DNA replication-independent nucleosome assembly(GO:0006336)	43	93	NM_007280,ENST00000254810,NM_018132,NM_018154,ENST00000377803,NM_001037738,NM_021968,NM_001100625,NM_001100624,NM_012295,NM_001079514,NM_018944,NM_001034077,NM_014034,NM_170589,NM_000489,NM_018455,NM_018410,NM_014288,NM_022909,NM_005610,NM_018353,NM_001199803,NM_022145,NM_024322,NM_001012507,NM_001809,NM_024629,NM_001012267,NM_024658,NM_002107,NM_003707,NM_003642,NM_003601,NM_003540,NM_003543,NM_…	true	0.236961	2.96172e-08
regulation of pathway-restricted SMAD protein phosphorylation(GO:0060393)	34	108	NM_018055,NM_004329,NM_007178,NM_013372,NM_012242,NM_000020,NM_000118,NM_020182,NM_133468,NM_006221,NM_021073,NM_005450,NM_005359,NM_000660,NM_014482,NM_005585,NM_031953,NM_001343,NM_001320,NM_001718,NM_001616,NM_182828,NM_001008712,NM_001191323,NM_002192,NM_181482,NM_001001557,NM_003239,NM_004612,NM_001200,NM_001202,NM_001204,NM_001105,NM_003318	true	-0.379772	3.08586e-08
extracellular matrix organization(GO:0030198)	361	796	NM_007255,NM_014654,NM_012464,NM_012465,NM_004346,NM_004360,NM_004357,NM_001204303,NM_018192,NM_014767,NM_007171,NM_147780,NM_057165,ENST00000471755,NM_004393,NM_004386,NM_004385,NM_004369,NM_004370,NM_019891,NM_013372,NM_001033047,NM_004079,NM_007308,NM_007314,NM_007313,NM_003013,NM_007361,NM_001174146,NM_001137675,NM_001037763,NM_001242607,NM_013993,NM_173465,NM_001163771,NM_021932,NM_001278939…	true	-0.142038	3.15618e-08
pathway-restricted SMAD protein phosphorylation(GO:0060389)	38	119	NM_018055,NM_004329,NM_007178,NM_013372,NM_012242,NM_001024847,NM_000020,NM_000118,NM_006313,NM_020182,NM_133468,NM_006221,NM_021073,NM_005450,NM_005359,NM_000660,NM_014482,NM_005585,NM_031953,NM_001343,NM_001320,NM_001718,NM_001616,NM_182828,NM_001008712,NM_001191323,NM_002192,NM_181482,NM_001001557,NM_003238,NM_003239,NM_003243,NM_004612,NM_001200,NM_001202,NM_001204,NM_001105,NM_003318	true	-0.36407	3.52117e-08
connective tissue development(GO:0061448)	194	379	NM_052872,NM_004329,NM_007112,ENST00000376332,ENST00000471755,NM_014918,NM_003030,NM_003013,NM_001178065,NM_003068,NM_020996,NM_004185,NM_020800,NM_020801,NM_021973,NM_021975,NM_001163771,NM_001080461,NM_001080432,NM_173568,NM_006006,NM_007015,NM_012201,NM_001010926,NM_013945,NM_001017995,NM_001024847,NM_005060,ENST00000330233,NM_000020,NM_000019,NM_000052,NM_001190839,NM_000088,NM_000093,NM_0000…	true	-0.187681	3.87316e-08
cardiac muscle tissue development(GO:0048738)	143	301	NM_001256012,NM_004274,NM_004343,NM_014757,NM_019884,NM_013372,NM_004093,NM_019851,NM_001136271,NM_003047,NM_001267550,NM_012082,NM_001080424,NM_021818,NM_173552,NM_020733,NM_001080508,NM_012259,NM_012242,NM_173354,NM_001024847,NM_000029,NM_020433,NM_001098816,NM_000965,NM_000165,NM_000192,NM_000256,NM_000258,NM_000257,NM_000232,NM_006395,NM_006393,NM_005251,NM_005257,NM_005247,NM_005235,NM_01867…	true	-0.212914	5.21452e-08
defense response to virus(GO:0051607)	199	479	ENST00000262259,NM_018082,NM_018026,NM_001030007,NM_012420,NM_052813,NM_004331,NM_018119,NM_004335,NM_007147,NM_001206491,ENST00000334163,NM_004031,NM_004068,NM_004052,NM_004048,NM_144701,NM_007329,NM_134323,NM_021975,NM_006187,NM_006139,NM_006074,NM_006084,NM_021822,NM_020746,NM_007055,NM_001033557,NM_001030288,NM_001242837,NM_172138,NM_172139,NM_172140,NM_172102,NM_207111,NM_012305,NM_005082,NM…	true	0.153432	5.31173e-08
regulation of viral genome replication(GO:0045069)	56	149	NM_004335,NM_001206491,NM_004396,NM_003064,NM_134323,NM_006187,NM_006139,NM_001080466,NM_021822,NM_020746,ENST00000372550,NM_172139,NM_005053,NM_005038,NM_006435,NM_006347,NM_006355,NM_005101,NM_020119,NM_181773,NM_021105,NM_021130,NM_021034,NM_000594,NM_000584,NM_000633,NM_022828,NM_021133,NM_014508,NM_005531,NM_080657,NM_022074,NM_032789,NM_203456,NM_002763,NM_002759,NM_001548,NM_205860,NM_0010…	true	0.218021	7.85384e-08
neuron projection guidance(GO:0097485)	371	940	NM_001122679,NM_001256064,NM_001256012,NM_018008,NM_001271938,NM_012445,NM_012431,NM_012471,NM_004263,ENST00000374139,NM_001204303,NM_007118,NM_007129,CR749417,NM_057165,NM_007096,NM_014808,NM_004386,NM_004369,NM_001101426,NM_014945,NM_004093,NM_057090,NM_004068,NM_004087,NM_007355,NM_007314,NM_007313,NM_003031,NM_003026,NM_001005194,NM_020911,NM_001178061,NM_001174066,NM_020971,NM_003062,NM_0030…	true	-0.136119	8.18023e-08
axon guidance(GO:0007411)	371	940	NM_001122679,NM_001256064,NM_001256012,NM_018008,NM_001271938,NM_012445,NM_012431,NM_012471,NM_004263,ENST00000374139,NM_001204303,NM_007118,NM_007129,CR749417,NM_057165,NM_007096,NM_014808,NM_004386,NM_004369,NM_001101426,NM_014945,NM_004093,NM_057090,NM_004068,NM_004087,NM_007355,NM_007314,NM_007313,NM_003031,NM_003026,NM_001005194,NM_020911,NM_001178061,NM_001174066,NM_020971,NM_003062,NM_0030…	true	-0.136119	8.18023e-08
bone development(GO:0060348)	131	242	NM_001271938,NM_012432,NM_007112,NM_144966,NM_019885,NM_013372,NM_014918,NM_003030,NM_003013,NM_003036,NM_020800,NM_001032280,NM_001037984,NM_012201,NM_001017995,NM_001024847,NM_000088,NM_000095,NM_018837,NM_000965,NM_000966,NM_000942,NM_000941,NM_000958,NM_001024630,NM_000118,NM_000142,NM_020318,NM_000168,NM_000261,NM_000230,NM_006378,NM_022356,NM_000288,NM_005221,NM_017637,NM_017653,NM_000346,N…	true	-0.218119	8.37867e-08
DNA strand elongation(GO:0022616)	35	81	NM_004111,NM_001080449,NM_006591,NM_000946,NM_000234,NM_006230,NM_198253,NM_001008537,NM_016095,NM_006739,NM_022836,NM_021173,NM_002913,NM_002915,NM_002916,NM_002947,NM_002946,NM_002945,NM_005915,NM_005916,NM_005914,NM_015450,NM_002691,NM_182802,NM_182776,NM_003504,NM_181471,NM_181578,NM_181558,NM_002592,NM_002388,NM_002311,NM_002312,NM_032336,NM_004526	true	0.241555	8.74916e-08
DNA replication(GO:0006260)	295	830	NM_007215,NM_018081,NM_018084,NM_007254,NM_012461,NM_052857,NM_004259,NM_052865,NM_004359,NM_004343,NM_007110,NM_014736,ENST00000420326,NM_007192,NM_144998,NM_173618,NM_013347,NM_001100399,NM_001114121,NM_013372,NM_007344,NM_013432,NM_007300,NM_004111,NM_013442,NM_013448,NM_020937,NM_003029,NM_001100400,NM_001174084,NM_004153,NM_001136160,NM_006190,NM_001113756,NM_001080449,NM_173518,NM_021830,NM…	true	0.131473	9.32766e-08
histone H4-K20 demethylation(GO:0035574)	11	25	ENST00000377803,NM_021968,NM_001034077,NM_015107,NM_030647,NM_001184898,NM_003540,NM_003543,NM_003542,NM_003547,NM_175054	true	0.299339	1.05125e-07
negative regulation of cellular component movement(GO:0051271)	161	410	NM_004235,NM_007261,NM_018055,NM_004252,NM_004333,NM_004327,NM_004335,NM_004309,NM_019592,NM_007184,NM_144997,NM_007178,NM_004393,NM_001080391,NM_013372,NM_014909,NM_173690,NM_004064,NM_003012,NM_003013,NM_007365,NM_021962,NM_020841,NM_006079,NM_006080,NM_001271749,NM_207191,NM_207197,NM_013943,NM_001017967,NM_001204088,NM_012301,NM_012341,NM_000022,NM_000042,NM_000020,NM_000090,NM_201525,NM_1707…	true	-0.195365	1.59223e-07
endomembrane system organization(GO:0010256)	365	897	NM_078471,NM_014688,NM_173872,NM_001204404,NM_007229,NM_014600,NM_014601,NM_018053,NM_001256012,NM_001256022,NM_018026,NM_004360,NM_004317,NM_018178,NM_014751,NM_007183,NM_007190,NM_014780,NM_018164,NM_007172,NM_001034954,NM_004383,NM_013336,NM_013312,NM_013322,NM_014866,NM_004068,NM_004087,NM_004073,NM_007342,NM_007357,NM_004106,NM_004114,NM_013451,NM_020922,NM_020919,NM_020971,NM_020987,NM_0041…	true	-0.13409	1.62443e-07
mitotic recombination(GO:0006312)	36	77	NM_001100119,NM_007110,NM_001205262,NM_173685,NM_004111,NM_001080449,NM_012415,NM_006591,NM_000057,NM_000946,NM_000249,NM_000234,NM_006231,NM_006230,NM_005590,NM_021173,NM_005732,NM_002913,NM_002915,NM_002916,NM_015110,NM_002947,NM_002946,NM_002945,NM_002875,NM_202001,NM_002691,NM_002692,NM_024624,NM_182625,NM_181471,NM_181578,NM_181558,NM_002592,NM_001067,NM_001068	true	0.236365	1.68363e-07
negative regulation of viral genome replication(GO:0045071)	39	110	NM_004335,NM_001206491,NM_003064,NM_006187,NM_001080466,NM_021822,NM_020746,NM_172139,NM_006435,NM_005101,NM_020119,NM_181773,NM_021105,NM_021034,NM_000594,NM_021133,NM_014508,NM_005531,NM_080657,NM_022074,NM_032789,NM_002763,NM_002759,NM_001548,NM_001006666,NM_024625,NM_182691,NM_002176,NM_003641,NM_145298,NM_003733,NM_002534,NM_001135652,NM_002462,NM_003483,NM_001111,NM_002201,NM_145699,NM_1524…	true	0.230382	2.40068e-07
regulation of bone development(GO:1903010)	5	8	NM_013372,NM_000941,NM_199141,NM_001191323,NM_002343	true	-0.67834	2.42361e-07
determination of dorsal/ventral asymmetry(GO:0048262)	11	28	NM_013372,NM_004083,NM_001278548,NM_001204088,NM_022469,NM_005454,NM_001098210,NM_001904,NM_001191323,NM_001105,NM_003393	true	-0.522413	2.7433e-07
negative regulation of cell motility(GO:2000146)	155	392	NM_004235,NM_007261,NM_018055,NM_004252,NM_004333,NM_004327,NM_004335,NM_004309,NM_019592,NM_007184,NM_144997,NM_007178,NM_004393,NM_001080391,NM_013372,NM_014909,NM_173690,NM_003012,NM_003013,NM_007365,NM_021962,NM_020841,NM_006079,NM_006080,NM_001271749,NM_207191,NM_207197,NM_013943,NM_001017967,NM_001204088,NM_012301,NM_012341,NM_000022,NM_000042,NM_000020,NM_000090,NM_201525,NM_000958,NM_0001…	true	-0.195174	2.76402e-07
vesicle localization(GO:0051648)	150	356	NM_004218,NM_001030005,NM_012437,NM_052893,NM_004333,NM_014747,NM_018190,NM_007166,NM_013388,NM_014866,NM_014932,NM_001242369,NM_004082,NM_007308,NM_003026,NM_020946,NM_014970,NM_014989,NM_003081,NM_004162,NM_004161,NM_004193,NM_021982,NM_006152,NM_001271667,ENST00000215095,NM_001080421,NM_001005360,NM_001001132,NM_001033503,NM_207012,NM_001024948,NM_012388,NM_012398,NM_006555,NM_000021,NM_018848…	true	-0.197749	2.8882e-07
negative regulation of viral process(GO:0048525)	77	234	NM_004335,NM_001206491,NM_014788,NM_001080391,NM_007375,NM_003064,NM_006187,NM_001080466,NM_021822,NM_020746,NM_007028,NM_172139,NM_012216,NM_012210,NM_005082,NM_006510,NM_006435,NM_171982,NM_000242,NM_005101,NM_020119,NM_181773,NM_021105,NM_021034,NM_000594,NM_000605,NM_016331,NM_014352,NM_006778,NM_018207,NM_005612,NM_030912,NM_021133,NM_014508,NM_030961,NM_005531,NM_080657,NM_005762,NM_022074,…	true	0.194905	3.08758e-07
DNA strand elongation involved in DNA replication(GO:0006271)	32	75	NM_004111,NM_001080449,NM_006591,NM_000946,NM_000234,NM_006230,NM_001008537,NM_016095,NM_006739,NM_021173,NM_002913,NM_002915,NM_002916,NM_002947,NM_002946,NM_002945,NM_005915,NM_005916,NM_005914,NM_002691,NM_182802,NM_182776,NM_003504,NM_181471,NM_181578,NM_181558,NM_002592,NM_002388,NM_002311,NM_002312,NM_032336,NM_004526	true	0.238584	3.11459e-07
bone mineralization involved in bone maturation(GO:0035630)	7	15	NM_013372,NM_000230,NM_000618,NM_001143804,NM_001191323,NM_001200,NM_002343	true	-0.60006	3.22702e-07
cartilage development(GO:0051216)	156	315	NM_052872,NM_004329,NM_007112,ENST00000376332,ENST00000471755,NM_014918,NM_003030,NM_003013,NM_003068,NM_020996,NM_004185,NM_020800,NM_021973,NM_021975,NM_001163771,NM_001080461,NM_006006,NM_007015,NM_012201,NM_001010926,NM_013945,NM_001024847,NM_000020,NM_000052,NM_001190839,NM_000088,NM_000095,NM_018837,NM_000965,NM_000966,NM_000900,NM_000941,NM_001024630,NM_170784,NM_000142,NM_000168,NM_000230…	true	-0.19346	3.30696e-07
heart development(GO:0007507)	386	772	NM_014693,NM_004239,NM_014632,NM_018055,NM_001256012,NM_018010,NM_001271938,NM_014707,NM_004274,NM_004346,NM_004329,NM_004341,NM_004343,NM_014757,NM_018190,NM_014781,NM_057168,NM_001099412,NM_001099404,NM_004385,NM_019884,NM_013372,NM_004093,NM_019851,NM_001136271,NM_004113,NM_003030,NM_003013,NM_014972,NM_003068,NM_003047,NM_020997,NM_004196,NM_001267550,NM_021973,NM_006167,NM_006174,NM_012082,N…	true	-0.127269	3.40962e-07
viral genome replication(GO:0019079)	76	197	NM_004335,NM_001206491,NM_004396,NM_003073,NM_003064,NM_134323,NM_006187,NM_006139,NM_001080466,NM_021822,NM_020746,ENST00000372550,NM_172139,NM_006564,NM_005053,NM_005038,NM_006435,NM_006402,NM_006347,NM_006355,NM_006395,NM_005101,NM_020119,NM_181773,NM_021105,NM_021130,NM_021034,NM_030803,NM_000594,NM_000584,NM_000633,NM_022828,NM_022802,NM_005595,NM_021155,NM_021133,NM_014517,NM_014508,NM_0008…	true	0.194992	3.47492e-07
positive regulation of cardiac muscle cell differentiation(GO:2000727)	7	18	NM_013372,NM_004093,NM_001191323,NM_033131,NM_001146312,NM_153604,NM_002397	true	-0.597555	3.81499e-07
establishment of vesicle localization(GO:0051650)	142	345	NM_004218,NM_001030005,NM_012437,NM_052893,NM_004333,NM_014747,NM_018190,NM_007166,NM_013388,NM_014866,NM_014932,NM_001242369,NM_004082,NM_007308,NM_003026,NM_020946,NM_014970,NM_014989,NM_003081,NM_004162,NM_004161,NM_004193,NM_021982,NM_006152,NM_001271667,ENST00000215095,NM_001080421,NM_001005360,NM_001001132,NM_001033503,NM_207012,NM_001024948,NM_012388,NM_012398,NM_006555,NM_000021,NM_018848…	true	-0.19869	5.15991e-07
DNA recombination(GO:0006310)	243	645	NM_004237,NM_001100119,NM_014641,NM_012444,NM_004259,NM_007110,NM_007126,ENST00000420326,ENST00000392133,NM_144998,NM_057161,NM_173618,NM_175871,NM_001205262,NM_001080394,NM_013342,NM_013347,NM_013351,NM_001114121,NM_001257370,NM_014855,NM_014946,NM_173685,NM_007349,NM_013432,NM_007300,NM_004111,NM_020937,NM_014967,NM_007363,NM_144688,NM_020839,NM_006139,NM_001080449,NM_172088,NM_173545,NM_007044…	true	0.134049	5.5369e-07
osteoclast proliferation(GO:0002158)	8	11	NM_001204375,NM_013372,NM_000908,NM_006290,NM_000757,NM_080721,NM_001191323,NM_003701	true	-0.566548	5.87078e-07
negative regulation of cell migration(GO:0030336)	151	386	NM_004235,NM_007261,NM_018055,NM_004252,NM_004333,NM_004327,NM_004335,NM_004309,NM_019592,NM_007184,NM_144997,NM_007178,NM_004393,NM_001080391,NM_013372,NM_014909,NM_173690,NM_003012,NM_003013,NM_007365,NM_021962,NM_020841,NM_006079,NM_006080,NM_001271749,NM_207191,NM_207197,NM_013943,NM_001017967,NM_001204088,NM_012301,NM_012341,NM_000022,NM_000042,NM_000020,NM_000090,NM_201525,NM_000958,NM_0001…	true	-0.192409	5.927e-07
bone trabecula morphogenesis(GO:0061430)	15	26	NM_007112,NM_013372,NM_003012,NM_014963,NM_000088,NM_133263,NM_006378,NM_001142287,NM_002673,NM_001999,NM_001191323,NM_002449,NM_001267,NM_004530,NM_003394	true	-0.464342	6.22552e-07
regulation of BMP signaling pathway(GO:0030510)	65	136	NM_013372,NM_173689,NM_007313,NM_003012,NM_003013,NM_003036,NM_001080500,NM_020648,NM_012242,NM_020634,NM_001010926,NM_001204088,NM_020429,ENST00000359999,NM_000020,NM_000118,NM_000138,NM_022469,NM_001164617,NM_001003652,NM_133468,NM_017617,NM_000522,NM_005454,NM_005450,NM_005430,NM_005359,NM_014319,NM_030756,NM_001258024,NM_005585,NM_022740,NM_005524,NM_005749,NM_203284,NM_001014795,NM_025237,NM…	true	-0.274214	6.72582e-07
negative regulation of hematopoietic progenitor cell differentiation(GO:1901533)	16	35	ENST00000377803,NM_014887,NM_021968,NM_001010926,NM_001034077,NM_006384,NM_017617,NM_005524,NM_001536,NM_001282402,NM_003540,NM_003543,NM_003542,NM_003547,NM_175054,NM_002619	true	0.265215	7.76504e-07
positive regulation of leukocyte migration(GO:0002687)	78	155	NM_004343,NM_007155,NM_004054,NM_004072,NM_003005,NM_004139,ENST00000252590,NM_020683,NM_020672,NM_207032,NM_005084,NM_018890,NM_000131,NM_006419,NM_000201,NM_006368,NM_005242,NM_006274,NM_006273,NM_000419,NM_148910,NM_000450,NM_000442,NM_001142343,NM_016202,NM_005337,NM_130760,NM_000565,NM_000594,NM_000589,NM_000584,NM_000600,NM_000609,NM_000602,NM_013258,NM_199168,NM_000710,NM_000820,NM_002995,…	true	0.188977	8.96211e-07
kidney vasculature development(GO:0061440)	6	13	NM_000297,NM_006206,NM_000435,NM_003206,NM_002609,NM_001202	true	-0.613875	9.22414e-07
renal system vasculature development(GO:0061437)	6	13	NM_000297,NM_006206,NM_000435,NM_003206,NM_002609,NM_001202	true	-0.613875	9.22414e-07
kidney vasculature morphogenesis(GO:0061439)	6	13	NM_000297,NM_006206,NM_000435,NM_003206,NM_002609,NM_001202	true	-0.613875	9.22414e-07
renal system vasculature morphogenesis(GO:0061438)	6	13	NM_000297,NM_006206,NM_000435,NM_003206,NM_002609,NM_001202	true	-0.613875	9.22414e-07
bone trabecula formation(GO:0060346)	11	13	NM_007112,NM_013372,NM_003012,NM_000088,NM_133263,NM_001999,NM_001191323,NM_002449,NM_001267,NM_004530,NM_003394	true	-0.505925	1.00462e-06
ameboidal-type cell migration(GO:0001667)	236	547	NM_004235,NM_014634,NM_018055,NM_001271938,NM_014707,NM_004333,NM_007127,NM_014795,NM_007178,NM_004390,NM_001080391,NM_013355,NM_013372,NM_004093,NM_014909,NM_019839,NM_007353,NM_020909,NM_020975,NM_004186,NM_021995,NM_021973,NM_012090,NM_021932,NM_001039958,NM_001130924,NM_006080,NM_006044,NM_006007,NM_001113490,NM_001017967,NM_001024847,NM_000029,NM_000042,NM_000039,NM_000020,NM_020441,NM_00504…	true	-0.153926	1.01707e-06
negative regulation of megakaryocyte differentiation(GO:0045653)	11	26	ENST00000377803,NM_021968,NM_001034077,NM_006384,NM_001536,NM_003540,NM_003543,NM_003542,NM_003547,NM_175054,NM_002619	true	0.279426	1.08681e-06
protein localization to plasma membrane(GO:0072659)	131	357	NM_001204404,NM_014600,NM_014601,NM_018026,NM_004360,NM_007183,NM_001034954,NM_004383,NM_004068,NM_004087,NM_004106,NM_004114,NM_020922,NM_020971,NM_020987,NM_012090,NM_012096,NM_001039966,NM_174976,NM_006098,NM_173570,NM_020752,NM_007033,NM_012249,NM_012307,NM_012339,NM_000037,NM_020477,NM_018890,NM_001008211,NM_018965,NM_001005743,NM_022474,NM_020399,NM_006330,NM_000259,NM_000224,NM_006384,NM_0…	true	-0.200088	1.15972e-06
muscle cell differentiation(GO:0042692)	285	593	NM_019618,NM_014601,NM_001256012,NM_172362,NM_014707,NM_052843,NM_052863,NM_004272,NM_004274,NM_004363,NM_004330,NM_004326,NM_004343,NM_014757,ENST00000334082,NM_004389,NM_019884,NM_019885,NM_013372,NM_004093,NM_001136239,NM_001136271,NM_007313,NM_003030,NM_003047,NM_020996,NM_003036,NM_044472,NM_004181,NM_020831,NM_001267550,NM_006181,NM_020856,NM_001080483,NM_134260,NM_020702,NM_001080424,NM_01…	true	-0.139587	1.31178e-06
mitotic nuclear division(GO:0007067)	372	989	NM_004217,NM_004219,NM_007221,NM_007234,NM_014629,NM_018086,NM_018063,NM_007280,NM_001271933,NM_014708,NM_052857,NM_004259,NM_052870,NM_004354,NM_018101,NM_004365,NM_004344,NM_004336,NM_001114091,NM_014750,ENST00000420326,NM_018136,NM_018131,NM_014780,NM_018164,NM_144998,NM_007174,NM_001099402,NM_018097,NM_001100399,NM_001114121,NM_001256270,NM_014885,NM_013366,NM_013367,NM_014865,NM_014881,NM_01…	true	0.110404	1.40812e-06
positive regulation of chemokine production(GO:0032722)	34	72	NM_001206491,NM_004139,NM_020746,NM_017442,NM_005211,NM_000418,NM_148910,NM_016232,NM_000474,NM_000576,NM_000565,NM_000594,NM_000600,NM_013258,NM_000676,NM_005304,NM_005306,NM_001356,NM_016562,NM_001735,NM_002759,NM_001025158,NM_138554,NM_001039661,NM_003821,NM_001135652,NM_003264,NM_003265,NM_004797,NM_002415,NM_003183,NM_181054,NM_033439,NM_001141	true	0.225814	1.69089e-06
negative regulation of myoblast fusion(GO:1901740)	5	11	NM_019618,NM_001127184,NM_001202519,NM_001565,NM_003879	true	0.309512	1.81016e-06
negative regulation of syncytium formation by plasma membrane fusion(GO:0034242)	5	13	NM_019618,NM_001127184,NM_001202519,NM_001565,NM_003879	true	0.309512	1.81016e-06
mesenchymal cell differentiation(GO:0048762)	144	309	NM_173849,NM_004329,NM_014780,NM_014795,NM_007178,NM_057168,NM_013372,NM_173689,NM_003012,NM_003013,NM_020909,NM_020975,NM_003068,NM_004186,NM_021973,NM_006080,NM_172037,NM_001010931,NM_001010934,NM_012259,NM_207197,NM_020532,NM_012342,NM_182983,ENST00000359999,NM_000088,NM_001024629,NM_000193,NM_000192,NM_006341,NM_021784,NM_006379,NM_005251,NM_022343,NM_005233,NM_005235,NM_001003652,NM_017617,N…	true	-0.187095	2.24893e-06
DNA-dependent DNA replication maintenance of fidelity(GO:0045005)	16	34	NM_144998,NM_013432,NM_020937,NM_000057,NM_198468,NM_005131,NM_014140,NM_001008537,NM_000489,NM_000553,NM_199294,NM_002691,NM_017858,NM_032143,NM_152683,NM_001261	true	0.257274	2.48522e-06
regulation of cardiac muscle tissue development(GO:0055024)	44	98	NM_004274,NM_019884,NM_013372,NM_004093,NM_019851,NM_021818,NM_012259,NM_012242,NM_001024847,NM_020433,NM_000165,NM_000192,NM_005257,NM_005247,NM_005235,NM_017617,NM_021110,NM_005450,NM_022970,NM_000684,NM_006744,NM_014482,NM_203284,NM_153370,NM_031966,NM_005994,NM_001166220,NM_001166175,NM_001786,NM_001191323,NM_153026,ENST00000359354,NM_033131,NM_033163,NM_002006,NM_002052,NM_001146312,NM_15360…	true	-0.306211	2.50286e-06
regulation of Ras protein signal transduction(GO:0046578)	429	1338	NM_014688,NM_004227,NM_014689,NM_014629,NM_014636,NM_018071,NM_014604,NM_012455,NM_012454,NM_014716,NM_014705,NM_052843,NM_018125,NM_004327,NM_001277335,NM_019555,NM_004308,NM_144973,NM_144977,NM_018173,NM_014744,NM_007118,NM_007197,NM_014786,NM_144997,NM_057169,NM_057159,NM_018098,NM_014808,NM_014832,NM_001030055,ENST00000393277,NM_001243765,NM_013385,ENST00000377494,NM_014875,NM_014874,NM_01485…	true	-0.111622	2.71554e-06
regulation of hematopoietic progenitor cell differentiation(GO:1901532)	29	76	NM_144997,ENST00000377803,NM_014887,NM_014950,NM_021968,NM_001010926,NM_001034077,NM_006384,NM_017617,NM_133372,NM_001029976,NM_000460,NM_005524,NM_015156,NM_002759,NM_001536,NM_001282402,NM_033128,NM_002129,NM_003540,NM_003543,NM_003542,NM_003547,NM_175054,NM_144606,NM_001135652,NM_032107,NM_002619,NM_002397	true	0.230276	2.74247e-06
positive regulation of muscle cell differentiation(GO:0051149)	64	135	NM_004274,NM_004330,NM_014757,NM_004389,NM_019885,NM_013372,NM_004093,NM_007313,NM_003030,NM_044472,NM_006181,NM_020856,NM_001039802,NM_000193,NM_018670,NM_005157,NM_198274,NM_006885,NM_000633,NM_000660,NM_000684,NM_001098210,NM_005593,NM_016166,NM_199289,NM_080647,NM_080646,NM_001014795,NM_002896,NM_015192,NM_001731,NM_002758,NM_002751,ENST00000267859,NM_001903,NM_001904,NM_001013398,NM_003971,N…	true	-0.262663	2.87817e-06
mesenchyme development(GO:0060485)	185	387	NM_173849,NM_018055,NM_004329,NM_018189,NM_014780,NM_014795,NM_007178,NM_057168,NM_013372,NM_173689,NM_003012,NM_003013,NM_020909,NM_020975,NM_003068,NM_004186,NM_021973,NM_012082,NM_006079,NM_006080,NM_172037,NM_001010931,NM_001010934,NM_012259,NM_207197,NM_020532,NM_012342,NM_182983,ENST00000359999,NM_000088,NM_001024629,NM_000118,NM_017420,NM_000193,NM_000192,NM_006341,NM_021784,NM_138815,NM_0…	true	-0.165164	2.95323e-06
ATP-dependent chromatin remodeling(GO:0043044)	58	148	NM_014614,NM_007280,NM_018132,ENST00000377803,NM_020920,NM_003074,NM_003073,NM_003072,NM_003079,NM_001037738,NM_021968,NM_001100625,NM_001100624,NM_006015,NM_020699,NM_001128429,NM_000145,NM_018944,NM_001034077,NM_170589,NM_020159,NM_170610,NM_018455,NM_001098426,NM_018410,NM_014288,NM_022909,NM_005610,NM_018353,NM_001199803,NM_001281453,NM_022145,NM_024322,NM_001012507,NM_001809,NM_015557,NM_024…	true	0.197223	2.99555e-06
membrane budding(GO:0006900)	52	157	NM_078471,NM_007166,NM_013388,NM_014866,NM_004161,NM_004193,NM_021982,NM_001033503,NM_001024948,NM_001287763,NM_199444,NM_006323,NM_006364,NM_017510,NM_006292,NM_021633,NM_014169,NM_001024227,NM_005338,NM_006827,NM_006815,NM_016057,NM_016128,NM_001098398,NM_005542,NM_138361,NM_002966,NM_001343,NM_002740,NM_001655,NM_016451,NM_022130,NM_002645,NM_001981,NM_001077207,NM_001002857,NM_138782,NM_01572…	true	-0.28508	3.00911e-06
nuclear DNA replication(GO:0033260)	32	64	NM_052857,NM_004111,NM_001080449,NM_006591,NM_006527,NM_000946,NM_017489,NM_017553,NM_000234,NM_006231,NM_006230,NM_000489,NM_030768,NM_005652,NM_021241,NM_021173,NM_030928,NM_002913,NM_002915,NM_002916,NM_002947,NM_002946,NM_002945,NM_002691,NM_002692,NM_017858,NM_003503,NM_181471,NM_181578,NM_181558,NM_002592,NM_145663	true	0.224895	3.17843e-06
metanephric S-shaped body morphogenesis(GO:0072284)	5	15	NM_000297,NM_024426,NM_002609,NM_001202,NM_003466	true	-0.627897	3.3836e-06
muscle structure development(GO:0061061)	482	1003	NM_004205,NM_019618,NM_173849,NM_014601,NM_001256012,NM_172362,ENST00000326282,NM_014707,NM_052843,NM_052868,NM_052863,NM_004272,NM_004274,NM_004363,NM_004330,NM_004326,NM_004343,NM_014722,NM_019593,AF006514,NM_007124,NM_014757,NM_057165,NM_001099401,ENST00000334082,NM_004389,NM_004396,NM_004369,NM_019884,NM_019885,NM_013329,NM_013372,NM_004093,NM_019851,NM_001136239,NM_001136271,NM_007313,NM_003…	true	-0.104368	3.5393e-06
ribonucleoprotein complex biogenesis(GO:0022613)	273	751	NM_007204,NM_018072,NM_012423,NM_014706,NM_001243646,NM_018115,NM_014740,NM_014753,NM_018128,NM_018130,NM_007165,NM_007178,NM_007080,NM_001037283,NM_001034996,NM_004397,NM_175854,NM_013393,NM_013354,NM_014953,NM_004053,NM_014976,NM_007362,NM_003096,NM_003094,NM_003095,NM_003093,NM_004175,NM_001037738,NM_134323,NM_006191,NM_006110,NM_001005369,ENST00000401695,NM_012118,NM_007043,NM_012238,NM_00103…	true	0.120472	3.65082e-06
response to ionizing radiation(GO:0010212)	119	321	NM_078467,NM_018124,NM_004324,NM_001267843,ENST00000392133,NM_018098,NM_001080394,NM_007349,NM_007300,NM_003012,NM_003013,NM_173475,NM_006106,NM_020886,NM_001004298,NM_001033549,NM_007027,NM_012238,NM_001204186,NM_207118,NM_182969,NM_000051,NM_000057,NM_006479,NM_000101,NM_000102,NM_000124,NM_001005735,NM_020375,NM_022550,NM_201612,NM_000251,NM_017553,NM_006388,NM_000201,NM_001018115,NM_022436,NM…	true	0.160352	3.97673e-06
glomerulus vasculature morphogenesis(GO:0072103)	5	11	NM_006206,NM_000435,NM_003206,NM_002609,NM_001202	true	-0.624412	4.05261e-06
glomerular capillary formation(GO:0072104)	5	11	NM_006206,NM_000435,NM_003206,NM_002609,NM_001202	true	-0.624412	4.05261e-06
platelet activation(GO:0030168)	231	658	NM_004214,NM_007269,NM_007283,NM_001278344,NM_004297,NM_001204303,NM_004313,NM_001122606,NM_004383,NM_001257389,ENST00000377494,NM_004041,NM_004080,NM_004078,NM_007353,NM_007351,NM_004106,NM_004101,NM_003029,NM_003005,NM_021913,NM_013995,NM_006113,NM_006105,NM_006133,NM_021871,NM_006000,NM_007023,NM_001010931,NM_001010934,NM_006572,NM_000039,NM_000034,NM_000014,NM_000062,NM_000089,NM_000088,NM_00…	true	-0.14703	4.07421e-06
vascular endothelial growth factor production(GO:0010573)	30	72	NM_018055,NM_004054,NM_007300,NM_134260,NM_007052,NM_013955,NM_000064,NM_018837,NM_201525,NM_000963,NM_133459,NM_014243,NM_000575,NM_000576,NM_000600,NM_000660,NM_000676,NM_001190981,NM_006665,NM_002982,NM_015170,NM_001735,NM_001668,NM_002184,NM_002020,NM_002052,NM_001123041,NM_001123396,NM_181054,NM_002202	true	0.226049	4.27883e-06
DNA replication initiation(GO:0006270)	27	67	NM_004359,NM_013347,NM_004153,NM_006190,NM_130395,NM_000946,NM_006231,NM_181747,NM_006739,NM_030928,NM_005859,NM_152259,NM_005915,NM_005916,NM_005914,NM_002692,NM_001798,NM_182776,NM_001146686,NM_003504,NM_152892,NM_002552,NM_002553,NM_002485,NM_002388,NM_001238,NM_004526	true	0.230779	4.29157e-06
cell cycle DNA replication(GO:0044786)	41	85	NM_052857,NM_004111,NM_001080449,NM_006591,NM_006527,NM_000946,NM_017489,NM_006306,NM_017553,NM_000234,NM_006231,NM_006230,NM_021627,NM_000489,NM_005445,NM_030768,NM_005652,NM_005590,NM_021241,NM_021173,NM_030928,NM_002913,NM_002915,NM_002916,NM_002947,NM_002946,NM_002945,NM_001281463,NM_002691,NM_002692,NM_203394,NM_017858,NM_024680,NM_003503,NM_181471,NM_003904,NM_181578,NM_181558,NM_002592,NM_…	true	0.211649	4.31417e-06
response to immobilization stress(GO:0035902)	13	17	NM_004179,NM_005252,NM_000475,NM_000537,NM_006895,NM_000761,NM_000756,NM_199292,NM_173174,NM_033199,NM_053049,NM_015973,NM_003225	true	0.261522	4.88065e-06
cellular senescence(GO:0090398)	43	145	NM_078467,NM_004329,NM_004343,NM_057168,NM_001099412,NM_001099436,NM_014840,NM_014909,NM_173685,NM_007313,NM_007366,NM_021994,NM_001030273,NM_012238,NM_000077,NM_006254,NM_000474,NM_000546,NM_005343,NM_014397,NM_005652,NM_015110,NM_016569,NM_005994,NM_153488,NM_002755,NM_001564,NM_015659,NM_024493,NM_024624,NM_001126118,NM_139078,NM_002166,NM_033244,NM_033247,NM_033238,NM_033109,NM_003722,NM_0031…	true	-0.301668	4.95877e-06
telomere maintenance via semi-conservative replication(GO:0032201)	22	48	NM_004111,NM_001080449,NM_006591,NM_000946,NM_017489,NM_000234,NM_006231,NM_006230,NM_005652,NM_021173,NM_002913,NM_002915,NM_002916,NM_002947,NM_002946,NM_002945,NM_002691,NM_002692,NM_181471,NM_181578,NM_181558,NM_002592	true	0.238678	5.17113e-06
endocardial cushion development(GO:0003197)	25	49	NM_004329,NM_003068,NM_000118,NM_000192,NM_017617,NM_000346,NM_000474,NM_005359,NM_014571,NM_203284,NM_005994,NM_001166220,NM_001982,NM_015513,NM_033163,NM_002052,NM_003246,NM_001040708,NM_002448,NM_002449,NM_001031717,NM_001200,NM_001202,NM_001105,NM_002202	true	-0.368017	5.21317e-06
regulation of vascular endothelial growth factor production(GO:0010574)	28	62	NM_018055,NM_004054,NM_007300,NM_134260,NM_007052,NM_013955,NM_000064,NM_018837,NM_000963,NM_133459,NM_000575,NM_000576,NM_000600,NM_000660,NM_000676,NM_001190981,NM_006665,NM_002982,NM_015170,NM_001735,NM_001668,NM_002184,NM_002020,NM_002052,NM_001123041,NM_001123396,NM_181054,NM_002202	true	0.227271	5.83362e-06
mismatch repair(GO:0006298)	26	166	NM_007313,NM_001204186,NM_006591,NM_000179,NM_000249,NM_000251,NM_006397,NM_005157,NM_014159,NM_001128144,NM_000534,NM_000535,NM_005427,NM_025259,NM_002947,NM_002946,NM_002945,NM_002739,NM_003686,NM_001040108,NM_002592,NM_003211,NM_002441,NM_002440,NM_002439,NM_004655	true	0.230516	5.88431e-06
chondrocyte differentiation(GO:0002062)	79	165	NM_014918,NM_003030,NM_003013,NM_003068,NM_004185,NM_020800,NM_021975,NM_006006,NM_012201,NM_001024847,NM_000020,NM_018837,NM_000965,NM_000966,NM_000941,NM_001024630,NM_000142,NM_000168,NM_017508,NM_018659,NM_000346,NM_000358,NM_014112,NM_018413,NM_014272,NM_030775,NM_000660,NM_013227,NM_001098210,NM_005596,NM_021192,NM_005529,NM_005523,NM_030955,NM_138370,NM_001503,NM_016626,NM_015170,NM_001718,…	true	-0.233942	6.01917e-06
ERBB signaling pathway(GO:0038127)	244	621	NM_004210,NM_078467,ENST00000270460,NM_144949,NM_004322,NM_001204303,NM_007127,NM_007096,NM_004383,NM_001243756,NM_019884,NM_001278160,NM_207578,NM_019851,NM_004036,NM_004068,NM_004064,NM_007314,NM_007313,NM_003029,NM_003026,NM_001174066,NM_020963,NM_020972,NM_020996,NM_004157,NM_001257206,NM_044472,NM_006139,NM_001039966,NM_012154,NM_001039802,NM_012199,NM_012116,NM_001242837,NM_020638,NM_020637…	true	-0.140454	6.44412e-06
cardiac muscle cell differentiation(GO:0055007)	78	174	NM_001256012,NM_004274,NM_004343,NM_014757,NM_019884,NM_013372,NM_004093,NM_001136271,NM_003047,NM_001267550,NM_001080424,NM_012259,NM_012242,NM_173354,NM_000029,NM_000965,NM_000192,NM_000232,NM_006395,NM_006393,NM_005257,NM_018670,NM_000368,NM_170707,NM_006206,NM_005159,NM_000432,NM_133379,NM_133378,NM_133376,NM_058244,NM_021110,NM_021097,NM_000684,NM_000686,NM_014412,NM_014482,NM_001173408,NM_1…	true	-0.2344	6.55719e-06
negative regulation of lipid storage(GO:0010888)	17	50	NM_007121,NM_207627,NM_020841,NM_020529,NM_005036,NM_020376,NM_000212,NM_000567,NM_000594,NM_000600,NM_016006,NM_005693,NM_005502,NM_002828,NM_138711,NM_080423,NM_002210	true	0.248089	6.71955e-06
NIK/NF-kappaB signaling(GO:0038061)	31	85	NM_004295,NM_004304,NM_006068,ENST00000373670,NM_000029,NM_006509,NM_198189,NM_005118,NM_000459,NM_006871,NM_006785,NM_014550,NM_021138,NM_015278,NM_024110,NM_002759,NM_001569,NM_138700,NM_053023,NM_003844,NM_003842,NM_001135652,NM_003270,NM_003265,NM_145803,NM_003188,NM_002377,NM_001276,NM_001165,NM_001166,ENST00000561610	true	0.220935	7.79454e-06
regulation of transcription from RNA polymerase II promoter involved in heart development(GO:1901213)	14	41	NM_013372,NM_017617,NM_203284,NM_005994,NM_002701,NM_001191323,NM_001146312,NM_153604,NM_003181,NM_002448,NM_002449,NM_003131,NM_001200,NM_001202	true	-0.440946	8.39022e-06
regulation of SMAD protein complex assembly(GO:0010990)	5	17	NM_020182,NM_005585,NM_001166220,NM_177951,NM_181482	true	-0.609287	8.79235e-06
negative regulation of SMAD protein complex assembly(GO:0010991)	5	17	NM_020182,NM_005585,NM_001166220,NM_177951,NM_181482	true	-0.609287	8.79235e-06
defense response to other organism(GO:0098542)	366	790	ENST00000262259,NM_173847,NM_018082,NM_007275,NM_018026,NM_001030007,NM_001011878,NM_012420,NM_052813,NM_052891,NM_052890,NM_004345,NM_004331,NM_018119,NM_004335,NM_001081551,NM_007147,NM_001206491,NM_001037500,NM_001033018,NM_001033017,NM_207469,ENST00000334163,NM_004031,NM_004068,NM_004052,NM_001033053,NM_004048,NM_004086,NM_144701,NM_007329,NM_004106,NM_004120,NM_003019,NM_003005,NM_001037499,…	true	0.103533	8.90028e-06
telomere maintenance via recombination(GO:0000722)	24	51	NM_007110,NM_173685,NM_004111,NM_001080449,NM_006591,NM_000946,NM_000234,NM_006231,NM_006230,NM_021173,NM_002913,NM_002915,NM_002916,NM_015110,NM_002947,NM_002946,NM_002945,NM_002691,NM_002692,NM_024624,NM_181471,NM_181578,NM_181558,NM_002592	true	0.231294	9.12917e-06
nucleosome positioning(GO:0016584)	5	10	NM_005321,NM_005320,NM_005319,NM_003601,NM_153833	true	0.295577	9.53988e-06
Golgi vesicle transport(GO:0048193)	212	576	NM_078471,NM_004227,NM_004239,NM_001204404,NM_007218,NM_014666,NM_007285,NM_018026,NM_001030007,NM_012430,NM_004287,NM_004311,NM_007126,NM_007096,NM_001278471,NM_004383,NM_013321,NM_013392,NM_013388,NM_014866,NM_014853,NM_014946,NM_004041,NM_007357,NM_003026,NM_003099,NM_020987,NM_004161,NM_004140,NM_004193,NM_001257999,NM_021982,NM_012090,NM_020896,NM_001271667,NM_001080435,NM_001005360,NM_02075…	true	-0.146855	1.02865e-05
macroautophagy(GO:0016236)	65	166	NM_007278,NM_007285,NM_014683,NM_018036,NM_014741,NM_014781,NM_001099436,NM_013325,NM_014924,NM_014991,NM_004161,NM_021934,NM_006044,NM_020773,NM_020775,NM_001033518,NM_012238,NM_000021,NM_001008211,NM_022488,NM_020375,NM_000271,NM_006395,NM_001004343,NM_014169,NM_016277,NM_001025300,NM_000546,NM_021020,NM_006913,NM_030803,NM_022818,NM_021202,NM_030981,NM_032547,NM_001014764,NM_005899,NM_016628,N…	true	-0.248399	1.03388e-05
epidermal growth factor receptor signaling pathway(GO:0007173)	238	601	NM_004210,NM_078467,ENST00000270460,NM_144949,NM_004322,NM_001204303,NM_007127,NM_007096,NM_004383,NM_001243756,NM_019884,NM_001278160,NM_207578,NM_019851,NM_004036,NM_004068,NM_004064,NM_007314,NM_007313,NM_003029,NM_003026,NM_001174066,NM_020963,NM_020972,NM_020996,NM_004157,NM_001257206,NM_044472,NM_006139,NM_001039966,NM_012154,NM_001039802,NM_012199,NM_012116,NM_001242837,NM_020638,NM_020637…	true	-0.139009	1.04236e-05
regulation of transmembrane receptor protein serine/threonine kinase signaling pathway(GO:0090092)	170	413	NM_014694,NM_018055,NM_052872,NM_004329,NM_144997,NM_007178,NM_013372,NM_173689,NM_013409,NM_007313,NM_003012,NM_003013,NM_003036,NM_004143,NM_021951,NM_006079,NM_001080500,NM_012245,NM_012238,NM_020648,NM_012242,NM_020634,NM_012201,NM_001010926,NM_001037802,NM_012342,NM_001204088,NM_012301,NM_001024847,NM_020429,ENST00000359999,NM_000020,NM_000076,NM_000118,NM_000138,NM_020328,NM_022469,NM_00019…	true	-0.162456	1.06228e-05
tissue morphogenesis(GO:0048729)	476	920	NM_019619,NM_004235,NM_014632,NM_018055,NM_018012,NM_018010,NM_001271938,NM_012431,NM_004360,NM_004324,NM_004329,NM_014751,NM_007129,NM_018190,NM_014795,NM_057168,NM_004390,NM_001243756,NM_173689,NM_001033047,NM_004087,NM_013409,NM_003015,NM_003030,NM_003012,NM_003013,NM_001178065,NM_020909,NM_020975,NM_003068,NM_003036,NM_004158,NM_001257206,NM_004143,NM_001267550,NM_013993,NM_021973,NM_012090,N…	true	-0.0997114	1.08689e-05
negative regulation of bone mineralization(GO:0030502)	10	30	NM_013372,NM_020638,NM_000346,NM_002727,NM_017745,NM_001191323,NM_173174,NM_003154,NM_001295,NM_004425	true	-0.486905	1.09083e-05
regulation of neuron differentiation(GO:0045664)	360	806	NM_004210,NM_001204424,NM_173808,NM_018084,NM_014618,NM_007283,NM_007284,NM_014683,NM_018008,NM_018014,NM_001271938,NM_012437,NM_012428,NM_014717,NM_012479,NM_004263,BC021560,NM_004343,NM_004309,NM_004316,NM_007148,NM_018136,NM_014780,NM_057159,NM_018098,NM_014809,NM_001278198,NM_001080395,NM_013366,NM_014845,NM_014943,NM_014932,NM_014912,NM_019850,NM_004114,NM_007314,NM_020929,NM_003030,NM_00103…	true	-0.113699	1.14985e-05
response to cold(GO:0009409)	27	42	NM_001100170,NM_007117,NM_007332,NM_020529,NM_000029,NM_000025,NM_000024,NM_000237,NM_005252,NM_001004431,NM_147161,NM_006877,NM_006839,NM_013261,NM_000684,NM_024080,NM_001565,NM_015547,NM_001796,NM_194271,NM_001130715,NM_003651,NM_002015,NM_002559,NM_003250,NM_032182,NM_003378	true	0.224335	1.2156e-05
receptor internalization(GO:0031623)	59	160	NM_004313,NM_007166,NM_001257389,NM_013372,NM_004041,NM_007308,NM_003014,NM_003026,NM_004162,NM_174936,NM_001005360,NM_001038633,NM_012242,NM_012407,NM_001004057,NM_012301,NM_005076,NM_020311,NM_000163,NM_198400,NM_017651,NM_001288739,NM_005160,NM_001288653,NM_000450,NM_001024227,NM_201278,NM_000584,NM_006868,NM_000634,NM_000795,NM_018373,NM_000863,NM_000867,NM_018368,NM_005795,NM_005856,NM_00585…	true	-0.2563	1.27767e-05
embryonic organ development(GO:0048568)	364	638	NM_173849,NM_014632,NM_018055,NM_018013,NM_018010,NM_001271943,NM_001271938,NM_012476,NM_004364,NM_004329,NM_004327,NM_014740,NM_018190,NM_007162,NM_057168,NM_001099412,NM_173689,NM_004087,NM_001136271,NM_003030,NM_014964,NM_020839,NM_021926,NM_021973,NM_021962,NM_021958,NM_006161,NM_012082,NM_020863,NM_001005366,NM_006079,NM_001032280,NM_012183,NM_006015,NM_001080508,NM_001256312,NM_172037,NM_02…	true	-0.112207	1.35287e-05
establishment of protein localization to plasma membrane(GO:0090002)	96	252	NM_001204404,NM_014600,NM_018026,NM_004360,NM_007183,NM_001034954,NM_004383,NM_004087,NM_020922,NM_020971,NM_020987,NM_012090,NM_012096,NM_001039966,NM_006098,NM_007033,NM_012249,NM_012339,NM_000037,NM_020477,NM_001008211,NM_022474,NM_020399,NM_006330,NM_000224,NM_006384,NM_006243,NM_001002296,NM_006259,NM_005163,NM_133376,NM_130830,NM_001098424,NM_014232,NM_030761,NM_006868,NM_014353,NM_006815,N…	true	-0.207479	1.40294e-05
parturition(GO:0007567)	14	36	NM_018055,NM_012323,NM_000916,NM_000959,NM_198465,NM_000756,NM_000860,NM_002982,NM_001957,NM_001955,BC108702,NM_003706,NM_001039585,NM_003258	true	0.250877	1.49232e-05
negative regulation of cartilage development(GO:0061037)	7	9	NM_000965,NM_000966,NM_000230,NM_005450,NM_001463,NM_004626,NM_003395	true	-0.538559	1.50786e-05
regulation of RIG-I signaling pathway(GO:0039535)	13	25	NM_017631,NM_020119,NM_201402,NM_024119,NM_024625,NM_033229,NM_001282144,NM_001256872,NM_001256873,NM_001256869,NM_001212,NM_001165,NM_001166	true	0.253812	1.51352e-05
nephron development(GO:0072006)	86	173	NM_014625,NM_018012,NM_014751,NM_020975,NM_020630,NM_001010926,NM_012301,NM_000019,NM_000091,NM_000092,NM_018837,NM_006522,NM_017415,NM_020335,NM_006317,NM_001164617,NM_005251,NM_000296,NM_198098,NM_014079,NM_000297,NM_006206,NM_017651,NM_017617,NM_001002295,NM_006236,NM_000346,NM_001190468,NM_000435,NM_001009944,NM_058238,NM_018490,NM_005450,NM_030761,NM_005359,NM_000619,NM_000633,NM_016341,NM_0…	true	-0.216473	1.58989e-05
cardiocyte differentiation(GO:0035051)	101	237	NM_014693,NM_001256012,NM_004274,NM_004343,NM_014757,NM_019884,NM_013372,NM_004093,NM_001136271,NM_003047,NM_001267550,NM_021973,NM_001080424,NM_012259,NM_012242,NM_173354,NM_000029,NM_001098816,NM_000965,NM_000192,NM_000232,NM_006395,NM_006393,NM_005257,NM_022454,NM_018670,NM_000368,NM_170707,NM_006206,NM_017617,NM_005159,NM_000432,NM_133379,NM_133378,NM_133376,NM_058244,NM_000474,NM_021110,NM_0…	true	-0.201427	1.64704e-05
ribosome assembly(GO:0042255)	17	44	NM_014753,NM_018128,NM_001037738,ENST00000401695,NM_199044,NM_016038,NM_005617,NM_016101,NM_005702,NM_001356,NM_001025071,NM_024580,NM_181468,NM_001010,NM_002520,NM_001022,NM_001212	true	0.241701	1.77311e-05
collagen fibril organization(GO:0030199)	37	74	NM_004370,NM_013372,NM_003013,NM_001174146,NM_001163771,NM_000052,NM_000089,NM_000088,NM_000090,NM_000093,NM_000934,NM_000267,NM_005251,NM_000393,NM_021110,NM_014243,NM_013227,NM_080629,NM_001453,NM_001014796,NM_080680,NM_005940,NM_001937,NM_001844,NM_001191323,NM_015719,NM_198551,NM_001042492,NM_139155,NM_001084,NM_003238,NM_004612,NM_002345,NM_002317,NM_002318,ENST00000367922,NM_032470	true	-0.304509	1.7809e-05
negative regulation of biomineral tissue development(GO:0070168)	12	32	NM_013372,NM_020638,NM_000346,NM_017680,NM_000820,NM_002727,NM_017745,NM_001191323,NM_173174,NM_003154,NM_001295,NM_004425	true	-0.452162	1.78099e-05
homophilic cell adhesion via plasma membrane adhesion molecules(GO:0007156)	139	419	NM_001277285,NM_012428,NM_014718,NM_052836,NM_004360,NM_004361,NM_013340,NM_004062,NM_004063,NM_004061,NM_144765,NM_020975,NM_021924,NM_020703,NM_021810,NM_020766,NM_207361,NM_020693,NM_020630,NM_181847,NM_018902,NM_022478,NM_018930,NM_018939,NM_018934,NM_018933,NM_018932,NM_018931,NM_018938,NM_018936,NM_018935,NM_018940,ENST00000394156,NM_005245,NM_000296,NM_014005,NM_019035,NM_017675,NM_006219,…	true	-0.173586	1.84877e-05
base-excision repair(GO:0006284)	44	152	NM_004111,NM_001080449,NM_012222,NM_006591,NM_000124,NM_000234,NM_006231,NM_006230,NM_005484,NM_001008537,NM_000546,NM_000553,NM_014311,NM_014481,NM_018248,NM_005590,NM_021173,NM_021147,NM_080649,NM_002947,NM_002946,NM_002945,NM_001282659,NM_001618,NM_002690,NM_002691,NM_002693,NM_031407,NM_024608,NM_145043,NM_001126118,NM_016828,NM_017944,NM_002128,NM_002129,NM_003925,NM_002592,NM_002528,NM_0025…	true	0.199612	1.89035e-05
single organism cell adhesion(GO:0098602)	370	918	NM_004214,NM_004235,NM_173843,NM_001122679,NM_173808,NM_007269,NM_018059,NM_018055,NM_018012,NM_001206609,NM_004363,NM_004360,NM_004361,NM_004333,NM_004343,ENST00000400546,NM_007183,ENST00000471755,NM_004389,NM_001243756,NM_014893,NM_014875,NM_014932,NM_001206885,NM_001033047,NM_004087,NM_004078,NM_007314,NM_007313,NM_144779,NM_003005,NM_014970,NM_020909,NM_020975,NM_003068,NM_020987,NM_020996,NM…	true	-0.109477	1.89377e-05
rRNA metabolic process(GO:0016072)	115	271	NM_018072,NM_014740,NM_018130,NM_007080,NM_001034996,NM_013393,NM_014953,NM_004053,NM_014976,NM_006191,ENST00000401695,NM_007043,NM_012238,NM_207118,NM_005033,NM_000987,NM_000996,NM_000969,NM_000975,NM_006453,NM_018983,NM_006333,NM_022366,NM_018648,NM_019037,NM_019001,NM_017647,NM_020158,NM_021645,NM_014168,NM_133375,NM_058219,NM_148956,ENST00000568546,NM_006993,NM_018428,NM_016355,NM_019082,NM_1…	true	0.153641	1.90276e-05
ear development(GO:0043583)	175	281	NM_173849,ENST00000374057,NM_018013,NM_004277,NM_004364,NM_004360,NM_004327,NM_007123,NM_014839,NM_019851,NM_004064,NM_021911,NM_021962,NM_006161,NM_006120,NM_001080476,NM_001032280,NM_001080508,NM_172037,NM_207361,NM_012259,NM_001010926,NM_020402,NM_182983,NM_001113347,NM_018890,NM_017420,NM_017433,NM_017412,NM_000168,NM_000193,NM_020335,NM_006401,NM_000260,NM_000263,NM_021728,NM_005247,NM_01408…	true	-0.155576	1.99281e-05
positive regulation of nucleoside metabolic process(GO:0045979)	17	37	NM_014688,NM_014629,NM_014853,NM_001172435,NM_012233,NM_001258457,NM_013261,NM_005665,NM_015279,NM_001677,NM_001678,NM_001679,NM_016495,NM_015705,NM_017933,NM_145245,NM_144628	true	-0.401385	2.01016e-05
negative regulation of mitochondrial outer membrane permeabilization involved in apoptotic signaling pathway(GO:1901029)	5	7	NM_173803,NM_006111,NM_017877,NM_003897,NM_001152	true	0.289527	2.09384e-05
regulation of bone mineralization(GO:0030500)	58	130	NM_004329,NM_013372,NM_006157,NM_001032280,NM_020638,NM_001024736,NM_000024,NM_001190839,NM_000900,NM_000165,NM_020223,NM_000315,NM_006208,NM_000346,NM_000474,NM_054027,NM_030761,NM_001025295,NM_000660,NM_016085,NM_199173,NM_000785,NM_001143804,NM_018360,NM_138370,NM_001014796,NM_005899,NM_001400,NM_001718,NM_005902,NM_001616,NM_002727,NM_198892,NM_001999,NM_017745,NM_001191323,NM_198551,NM_17317…	true	-0.252309	2.1716e-05
negative regulation of multi-organism process(GO:0043901)	107	301	NM_004345,NM_004335,NM_001206491,NM_014788,NM_001080391,NM_007375,NM_003064,NM_004139,NM_134323,NM_006187,NM_001080466,NM_021822,NM_020746,NM_001033557,NM_007028,NM_172139,NM_012237,NM_012216,NM_012210,NM_005082,NM_006510,NM_006435,NM_171982,NM_000242,NM_000250,NM_006355,NM_005101,NM_020119,NM_181773,NM_000417,NM_148910,NM_130852,NM_021105,NM_021034,NM_000572,NM_000594,NM_000605,NM_000619,NM_0163…	true	0.156312	2.20435e-05
negative regulation of lipase activity(GO:0060192)	13	24	NM_007313,NM_007366,NM_000040,NM_000039,NM_000941,NM_005157,NM_014495,NM_001013706,NM_002923,NM_002959,NM_001714,NM_001643,NM_139314	true	0.251239	2.20925e-05
trabecula formation(GO:0060343)	25	38	NM_007112,NM_013372,NM_003012,NM_012259,NM_000088,NM_133263,NM_054014,NM_000459,NM_006988,NM_006744,NM_014482,NM_000801,NM_014585,NM_022051,NM_001166175,NM_001999,NM_001191323,NM_003243,NM_001040708,NM_002449,NM_003131,NM_001234,NM_001267,NM_004530,NM_003394	true	-0.34948	2.21292e-05
positive regulation of epithelial cell migration(GO:0010634)	76	178	NM_014634,NM_014707,NM_007127,NM_004390,NM_020909,NM_006044,NM_001113490,NM_001024847,NM_000029,NM_005022,NM_000963,NM_133265,NM_001024629,NM_000245,NM_006384,NM_000212,NM_005251,NM_022343,NM_005238,NM_198098,NM_133459,NM_001002295,NM_000346,NM_005139,NM_005163,NM_022334,NM_017679,NM_014296,NM_130847,NM_000459,NM_016202,NM_005400,NM_000660,NM_013232,ENST00000360635,NM_000697,NM_005505,NM_014567,N…	true	-0.224891	2.22251e-05
negative regulation of ossification(GO:0030279)	23	57	NM_013372,NM_014918,NM_003012,NM_004179,NM_020638,NM_020429,NM_006208,NM_017617,NM_000346,NM_001164737,NM_000633,NM_000660,NM_203284,NM_025237,NM_002727,NM_017745,NM_001191323,NM_173174,NM_003154,NM_002397,NM_002334,NM_001295,NM_004425	true	-0.359563	2.30089e-05
response to corticosterone(GO:0051412)	20	23	NM_007117,NM_003054,NM_005253,NM_005252,NM_005184,NM_000349,NM_005438,NM_006888,NM_000781,NM_006732,NM_000756,NM_000706,NM_199292,NM_000898,NM_001012338,NM_203314,NM_001166579,NM_053049,NM_053056,NM_002229	true	0.233168	2.30227e-05
striated muscle cell differentiation(GO:0051146)	208	414	NM_019618,NM_014601,NM_001256012,NM_172362,NM_014707,NM_052843,NM_052863,NM_004272,NM_004274,NM_004363,NM_004326,NM_004343,NM_014757,ENST00000334082,NM_019884,NM_019885,NM_013372,NM_004093,NM_001136271,NM_003030,NM_003047,NM_003036,NM_004181,NM_001267550,NM_001080483,NM_020702,NM_001080424,NM_006063,NM_006037,NM_001204218,NM_012259,NM_012242,NM_020634,NM_173354,NM_000029,NM_000069,NM_000070,NM_00…	true	-0.142072	2.44414e-05
stem cell differentiation(GO:0048863)	300	605	NM_014693,NM_004229,NM_004235,NM_173849,NM_018083,NM_014633,NM_007252,NM_018068,NM_018055,NM_012482,NM_004264,NM_004268,NM_004269,NM_004270,NM_004333,NM_004326,NM_004329,NM_004316,AF006514,NM_018136,NM_014780,ENST00000392133,NM_014795,NM_007178,NM_057168,NM_001099412,NM_007084,NM_014815,NM_004380,NM_014887,NM_013372,NM_014943,NM_019852,NM_173689,NM_001257281,NM_007358,NM_003012,NM_003013,NM_02090…	true	-0.119201	2.54609e-05
regulation of viral-induced cytoplasmic pattern recognition receptor signaling pathway(GO:0039531)	14	26	NM_017631,NM_020119,NM_201402,NM_024119,NM_024625,NM_033229,NM_001282144,NM_001256872,NM_001256873,NM_001256869,NM_003270,NM_001212,NM_001165,NM_001166	true	0.247108	2.60629e-05
single-organism membrane budding(GO:1902591)	33	87	NM_078471,NM_013388,NM_014866,NM_004161,NM_004193,NM_021982,NM_001033503,NM_199444,NM_006323,NM_006364,NM_017510,NM_021633,NM_001024227,NM_006827,NM_006815,NM_016057,NM_016128,NM_001098398,NM_005542,NM_002740,NM_001655,NM_016451,NM_022130,NM_001077207,NM_033127,ENST00000368979,NM_001252231,NM_003590,NM_004922,NM_144628,NM_003795,NM_004766,NM_183352	true	-0.311322	3.01749e-05
developmental growth involved in morphogenesis(GO:0060560)	151	283	NM_007283,NM_007284,NM_014683,NM_018014,NM_018012,NM_001271938,NM_004263,NM_001204303,NM_007112,NM_001080395,NM_013366,NM_004097,NM_004114,NM_007313,NM_003015,NM_003012,NM_003013,NM_020909,NM_003062,NM_003061,NM_001257206,NM_004186,NM_001271534,NM_006168,NM_020851,NM_006080,NM_172037,NM_001122742,NM_020532,NM_012301,NM_001024847,NM_000095,NM_000965,NM_000966,NM_000941,NM_001024629,NM_017420,NM_00…	true	-0.162907	3.10142e-05
sensory organ development(GO:0007423)	428	724	NM_004235,NM_173849,ENST00000374057,NM_014617,NM_001256012,NM_018013,NM_014714,NM_012476,NM_001034853,NM_001034852,NM_004277,NM_004364,NM_004366,NM_004360,NM_004324,NM_004327,NM_004316,NM_007123,NM_057168,NM_014839,NM_175875,NM_019885,NM_014874,NM_057093,NM_019851,NM_004064,NM_004087,NM_001136271,NM_173728,NM_013435,NM_001174146,NM_003072,NM_003078,NM_020975,NM_020989,NM_003036,NM_001112704,NM_00…	true	-0.0993443	3.17814e-05
cytoplasmic pattern recognition receptor signaling pathway(GO:0002753)	52	132	NM_052814,NM_052813,NM_004031,NM_021975,NM_006116,NM_006092,NM_001032288,NM_020746,NM_020529,NM_018955,NM_017631,NM_006290,NM_020119,NM_201402,NM_021009,NM_014314,NM_015093,NM_138348,NM_015247,NM_002954,NM_024119,NM_153497,NM_002758,NM_022168,NM_022162,NM_001571,NM_001570,NM_001569,NM_001556,NM_031483,NM_015578,NM_024625,NM_145065,NM_138554,NM_033229,NM_001282144,NM_001256872,NM_001256873,NM_0012…	true	0.188601	3.21143e-05
autophagy(GO:0006914)	167	464	NM_007262,NM_007278,NM_007285,NM_018031,NM_014683,NM_018036,NM_001271943,NM_004322,NM_014741,NM_014781,NM_007162,NM_001099436,NM_004394,NM_013325,NM_014874,NM_014844,NM_014924,NM_004034,NM_004052,NM_007314,NM_007313,NM_014991,NM_020964,NM_004161,NM_173794,NM_021934,NM_006118,NM_012179,NM_006044,NM_020773,NM_020775,NM_007075,NM_001033518,NM_012238,NM_012237,NM_001024948,NM_001135032,NM_013978,NM_0…	true	-0.15508	3.2672e-05
response to progesterone(GO:0032570)	26	48	NM_004322,NM_001005291,NM_021975,NM_182965,NM_000916,NM_005253,NM_005252,NM_000433,NM_005438,NM_000660,NM_006732,NM_005693,NM_002982,NM_005854,NM_001753,NM_001025100,NM_001943,NM_001942,NM_001775,NM_002509,NM_001071,NM_003246,NM_003238,NM_003239,NM_003264,NM_002229	true	0.219568	3.32044e-05
ossification(GO:0001503)	329	676	NM_001178117,NM_001178133,NM_001034852,NM_004364,NM_004329,NM_007112,ENST00000376332,ENST00000471755,NM_004396,NM_004385,NM_013372,NM_014918,NM_001033047,NM_013417,NM_004104,NM_003030,NM_003012,NM_003013,NM_014963,NM_001178065,NM_020905,NM_003068,NM_003052,NM_003036,NM_004143,NM_004179,NM_020800,NM_021973,NM_006157,NM_020865,NM_001005340,NM_006098,NM_001032280,NM_006037,NM_006039,NM_006006,NM_012…	true	-0.112314	3.40597e-05
positive regulation of release of sequestered calcium ion into cytosol(GO:0051281)	26	58	NM_004274,NM_004324,NM_007308,NM_007313,NM_001039966,NM_000070,NM_018689,NM_006288,NM_000506,NM_005409,NM_000794,NM_000710,NM_001142797,NM_001504,NM_002995,NM_001770,NM_001565,NM_001992,NM_001957,NM_003950,NM_002188,NM_033277,NM_002613,NM_002416,NM_003130,NM_003304	true	0.219159	3.53524e-05
double-strand break repair(GO:0006302)	145	373	NM_004238,NM_004237,NM_001100119,NM_014641,NM_014647,NM_007126,ENST00000392133,NM_175871,NM_001205262,NM_001080394,NM_001114121,NM_014855,NM_173685,NM_013432,NM_007300,NM_004111,NM_014967,NM_144688,NM_020839,NM_001080449,NM_173545,NM_001033549,NM_012415,NM_001136566,NM_000051,NM_000057,NM_000059,NM_006515,NM_001128429,NM_006479,NM_018975,NM_001005735,NM_022550,NM_198468,NM_006341,NM_000249,NM_000…	true	0.138783	3.61178e-05
regulation of chemokine production(GO:0032642)	52	107	NM_004235,NM_001206491,NM_003068,NM_004139,NM_021805,NM_020746,NM_017442,NM_005242,NM_005211,NM_000418,NM_148910,NM_016232,NM_000474,NM_005373,NM_000576,NM_000565,NM_000594,NM_000589,NM_000600,NM_000619,NM_013258,NM_000676,NM_005304,NM_005306,NM_000852,NM_001356,NM_016562,NM_001700,NM_001735,NM_002759,NM_002757,NM_001647,NM_001025158,NM_001972,NM_182919,NM_024544,NM_138554,NM_002133,NM_181435,NM_…	true	0.187846	3.62393e-05
retrograde vesicle-mediated transport, Golgi to ER(GO:0006890)	25	72	NM_004193,NM_007033,NM_020680,NM_172208,NM_012407,NM_199444,NM_001024227,NM_006827,NM_006816,NM_016057,NM_016128,NM_016106,NM_006612,NM_001098398,NM_002869,NM_016577,NM_001655,NM_016451,NM_031431,NM_031296,NM_002111,NM_001077637,NM_153603,NM_004766,NM_003190	true	-0.341877	3.83431e-05
ribosome biogenesis(GO:0042254)	153	387	NM_018072,NM_018115,NM_014740,NM_014753,NM_018128,NM_018130,NM_007080,NM_001034996,NM_013393,NM_014953,NM_004053,NM_014976,NM_001037738,NM_006191,ENST00000401695,NM_007043,NM_012238,NM_207118,NM_012341,NM_005008,NM_005033,NM_000987,NM_000996,NM_000969,NM_000975,NM_000972,NM_006453,NM_018983,NM_006325,NM_006333,NM_005275,NM_022366,NM_018648,NM_019037,NM_000314,NM_000368,NM_017647,NM_020158,NM_0216…	true	0.135806	3.88096e-05
regulation of myoblast fusion(GO:1901739)	13	28	NM_019618,NM_014601,NM_052863,NM_001127184,NM_006795,NM_001202519,NM_001565,NM_003879,NM_001040033,NM_004864,NM_002479,NM_002478,NM_002416	true	0.24722	3.97352e-05
anatomical structure maturation(GO:0071695)	41	76	NM_007112,NM_013372,NM_020975,NM_000020,NM_000142,NM_000230,NM_006378,NM_001002295,NM_001142287,NM_000400,NM_021111,NM_000515,NM_000540,NM_005430,NM_000618,NM_006846,NM_005583,NM_001143804,NM_001400,NM_023035,NM_016564,NM_001127699,NM_001127698,NM_001664,NM_001655,NM_002673,NM_003990,NM_001793,NM_001795,NM_001191323,NM_015973,NM_003936,NM_003885,NM_003737,NM_003238,NM_002449,NM_032217,NM_001200,N…	true	-0.282066	4.17302e-05
glomerulus vasculature development(GO:0072012)	17	32	NM_005251,NM_198098,NM_006206,NM_017617,NM_000435,NM_005524,NM_001613,NM_001025109,NM_001964,NM_024426,NM_001773,NM_145260,NM_003206,NM_002608,NM_002609,NM_001202,NM_001146	true	-0.389623	4.42361e-05
lipid storage(GO:0019915)	57	131	NM_012448,NM_007121,NM_013332,NM_004075,NM_207627,NM_020841,NM_001080472,NM_001080432,NM_020529,NM_000039,NM_000064,NM_005036,NM_020376,NM_000237,NM_000212,NM_000384,NM_006208,NM_000405,NM_000521,NM_000576,NM_000567,NM_000594,NM_000600,NM_005306,NM_016006,NM_006795,NM_005693,NM_014495,NM_005502,NM_005505,NM_022776,NM_032564,NM_001478,NM_001013706,NM_032667,NM_025079,NM_001753,NM_002828,NM_203402,…	true	0.182262	4.44943e-05
embryonic organ morphogenesis(GO:0048562)	242	420	NM_173849,NM_014632,NM_018055,NM_018013,NM_018010,NM_001271938,NM_012476,NM_004327,NM_014740,NM_018190,NM_057168,NM_173689,NM_004087,NM_003030,NM_021926,NM_021973,NM_021962,NM_021958,NM_006161,NM_001005366,NM_001032280,NM_006015,NM_001080508,NM_172037,NM_024915,NM_020693,AB031230,NM_001024847,NM_020402,NM_182983,NM_006562,ENST00000359999,NM_000021,NM_018848,NM_000965,NM_000966,NM_018890,NM_001024…	true	-0.127292	5.02856e-05
regulation of biomineral tissue development(GO:0070167)	63	138	NM_004329,NM_013372,NM_006157,NM_001032280,NM_020638,NM_001024736,NM_000024,NM_001190839,NM_000900,NM_006522,NM_000165,NM_020223,NM_000315,NM_006208,NM_000346,NM_017680,NM_000474,NM_054027,NM_030761,NM_001025295,NM_000660,NM_016085,NM_199173,NM_000785,NM_001143804,NM_000820,NM_018360,NM_138370,NM_001014796,NM_005899,NM_001400,NM_001718,NM_005902,NM_001616,NM_002727,NM_198892,NM_001999,NM_017745,N…	true	-0.234231	5.08135e-05
mesenchymal cell development(GO:0014031)	131	274	NM_173849,NM_004329,NM_014780,NM_014795,NM_007178,NM_057168,NM_013372,NM_173689,NM_003012,NM_003013,NM_020909,NM_020975,NM_003068,NM_004186,NM_021973,NM_006080,NM_172037,NM_001010931,NM_001010934,NM_012259,NM_207197,NM_020532,NM_012342,NM_182983,ENST00000359999,NM_000088,NM_001024629,NM_000193,NM_000192,NM_006341,NM_021784,NM_006379,NM_005251,NM_022343,NM_005233,NM_005235,NM_001003652,NM_017617,N…	true	-0.169454	5.08948e-05
regulation of alkaline phosphatase activity(GO:0010692)	10	24	NM_182983,NM_133263,NM_006378,NM_001142287,NM_000594,NM_001503,NM_005902,NM_003238,NM_002397,NM_002203	true	-0.461178	5.26539e-05
regulation of necrotic cell death(GO:0010939)	17	35	NM_001127184,NM_006871,NM_014320,NM_005729,NM_005954,NM_001202519,NM_001162383,NM_031229,NM_003651,NM_003879,NM_003824,NM_003804,NM_004723,NM_001165,NM_001166,NM_001151,NM_003353	true	0.234316	5.33036e-05
rRNA processing(GO:0006364)	110	256	NM_018072,NM_014740,NM_018130,NM_007080,NM_001034996,NM_013393,NM_014953,NM_004053,NM_014976,NM_006191,ENST00000401695,NM_007043,NM_012238,NM_207118,NM_005033,NM_000987,NM_000996,NM_000969,NM_000975,NM_006453,NM_018983,NM_006333,NM_022366,NM_018648,NM_019037,NM_017647,NM_020158,NM_021645,NM_014168,NM_058219,NM_148956,ENST00000568546,NM_006993,NM_018428,NM_016355,NM_019082,NM_199044,NM_022917,NM_0…	true	0.149626	5.42999e-05
trabecula morphogenesis(GO:0061383)	37	77	NM_007112,NM_013372,NM_003012,NM_014963,NM_020733,NM_012259,NM_000088,NM_133263,NM_006378,NM_017617,NM_001142287,NM_054014,NM_000459,NM_006988,NM_019074,NM_006744,NM_014482,NM_000801,NM_014585,NM_203284,NM_001400,NM_022051,NM_001664,NM_002673,NM_001166175,NM_001999,NM_001191323,NM_003923,NM_003243,NM_004774,NM_001040708,NM_002449,NM_003131,NM_001234,NM_001267,NM_004530,NM_003394	true	-0.290171	5.44815e-05
cellular response to lipopolysaccharide(GO:0071222)	95	241	NM_014633,NM_001037341,NM_004271,NM_004345,NM_007313,NM_004120,NM_001174104,NM_001037499,NM_004139,NM_207315,NM_021913,NM_021975,NM_021805,NM_001278548,NM_001278547,NM_020661,NM_020529,NM_005007,NM_000952,NM_000102,NM_020353,NM_000201,NM_005263,NM_021724,NM_000349,NM_001164722,NM_006290,NM_147156,NM_001079821,NM_005400,NM_018445,NM_000572,NM_000574,NM_000576,NM_019088,NM_000594,NM_000584,NM_00060…	true	0.156598	5.50141e-05
hindbrain radial glia guided cell migration(GO:0021932)	7	20	NM_004389,NM_133376,NM_016269,NM_016564,NM_182896,NM_003565,NM_002336	true	-0.51496	5.51747e-05
positive regulation of leukocyte chemotaxis(GO:0002690)	57	118	NM_004343,NM_004054,NM_004072,NM_004139,NM_020672,NM_207032,NM_005084,NM_018890,NM_000131,NM_006419,NM_006368,NM_005242,NM_006274,NM_006273,NM_148910,NM_001142343,NM_016202,NM_005337,NM_000565,NM_000589,NM_000584,NM_000600,NM_000609,NM_000602,NM_199168,NM_000820,NM_002995,NM_002989,NM_002982,NM_002963,NM_002872,NM_002889,NM_016584,NM_002843,NM_001025158,NM_001565,NM_001557,NM_001957,NM_001956,NM_…	true	0.180753	5.63707e-05
negative regulation of cell projection organization(GO:0031345)	94	195	NM_014683,NM_018014,NM_012437,NM_004263,NM_004309,NM_057159,NM_014809,NM_001080395,NM_019850,NM_004114,NM_001037442,NM_003061,NM_004186,NM_006080,NM_001206999,NM_007044,NM_007029,NM_172200,NM_020532,NM_005093,NM_000021,NM_001025616,NM_017514,NM_001258457,NM_006384,NM_147204,NM_005263,NM_005215,NM_000314,NM_001164741,NM_006254,NM_006288,NM_000412,NM_000430,NM_133376,NM_014247,NM_199002,NM_016337,N…	true	-0.19557	5.75127e-05
negative regulation of protein phosphorylation(GO:0001933)	256	632	NM_019619,NM_007207,NM_007236,NM_014634,NM_007262,NM_007261,NM_007271,NM_012479,NM_004346,NM_004324,NM_004323,NM_144949,NM_007199,NM_007178,NM_001278160,NM_013372,NM_078626,NM_004090,NM_014906,NM_004064,NM_007313,NM_004124,NM_003015,NM_003012,NM_003013,NM_020972,NM_004157,NM_175918,NM_004181,NM_001037738,NM_134323,NM_006153,NM_006142,NM_173515,NM_006098,NM_012179,NM_001172415,NM_012116,NM_012124,…	true	-0.122936	5.80985e-05
GO:0032318	358	1104	NM_014688,NM_014689,NM_014629,NM_014636,NM_018071,NM_014604,NM_012454,NM_014716,NM_014705,NM_052843,NM_018125,NM_004327,NM_001277335,NM_019555,NM_004308,NM_144973,NM_144977,NM_018173,NM_014744,NM_007118,NM_007197,NM_014786,NM_057169,NM_018098,NM_014808,NM_014832,NM_001030055,ENST00000393277,NM_001243765,ENST00000377494,NM_014853,NM_014857,NM_014856,NM_014957,NM_019850,NM_144707,NM_013401,NM_17372…	true	-0.104304	6.20047e-05
triglyceride homeostasis(GO:0070328)	25	68	NM_004277,NM_004123,NM_001080472,NM_134260,NM_012238,NM_000040,NM_000039,NM_000078,NM_000236,NM_000237,NM_018687,NM_000483,NM_054024,NM_005693,NM_014495,NM_052968,NM_005505,NM_032562,NM_032564,NM_001486,NM_001646,NM_032951,NM_031459,NM_139314,NM_181435	true	0.21701	6.30408e-05
acylglycerol homeostasis(GO:0055090)	25	68	NM_004277,NM_004123,NM_001080472,NM_134260,NM_012238,NM_000040,NM_000039,NM_000078,NM_000236,NM_000237,NM_018687,NM_000483,NM_054024,NM_005693,NM_014495,NM_052968,NM_005505,NM_032562,NM_032564,NM_001486,NM_001646,NM_032951,NM_031459,NM_139314,NM_181435	true	0.21701	6.30408e-05
negative regulation of transmembrane receptor protein serine/threonine kinase signaling pathway(GO:0090101)	102	224	NM_014694,NM_007178,NM_013372,NM_013409,NM_007313,NM_003012,NM_003013,NM_003036,NM_001080500,NM_012238,NM_020648,NM_012242,NM_020634,NM_012201,NM_001037802,NM_012342,NM_001204088,NM_012301,NM_001024847,NM_020429,NM_000118,NM_000138,NM_022469,NM_018955,NM_001286351,NM_006313,NM_001003652,NM_020182,NM_133468,NM_133493,NM_006221,NM_017617,NM_017680,NM_000546,NM_005454,NM_005450,NM_018413,NM_005430,N…	true	-0.18755	6.36563e-05
SMAD protein complex assembly(GO:0007183)	14	37	NM_001003652,NM_020182,NM_054014,NM_005359,NM_000660,NM_005585,NM_000801,NM_153232,NM_005902,NM_005900,NM_001166220,NM_177951,NM_181482,NM_004799	true	-0.410097	6.38534e-05
actin cytoskeleton reorganization(GO:0031532)	81	207	NM_014625,NM_012431,NM_014808,NM_007314,NM_007313,NM_006105,NM_006118,NM_001271667,NM_001080435,NM_006035,NM_012120,NM_001135190,NM_001256627,ENST00000379350,NM_018842,ENST00000395358,NM_017525,NM_000222,NM_147204,NM_005246,NM_005211,NM_006206,NM_005157,NM_014172,NM_017679,NM_001136001,NM_000459,NM_021033,NM_005402,NM_014215,NM_005335,NM_005343,NM_001007156,NM_000660,NM_000759,NM_018222,ENST00000…	true	-0.207283	6.65351e-05
receptor metabolic process(GO:0043112)	115	291	NM_004218,NM_014710,NM_004313,NM_007166,NM_001257389,NM_013372,NM_014916,NM_004041,NM_007308,NM_003014,NM_003026,NM_020919,NM_004162,NM_021982,NM_006178,NM_174936,NM_001005360,NM_021804,NM_006044,NM_001206998,NM_001038633,NM_012235,NM_012242,NM_012407,NM_001004057,NM_012301,NM_005076,NM_020429,NM_000021,NM_001113347,NM_005036,NM_001008211,NM_020311,NM_000163,NM_198400,NM_006420,NM_000212,NM_02172…	true	-0.177004	6.81752e-05
cardiac muscle fiber development(GO:0048739)	9	36	NM_133379,NM_133378,NM_032608,NM_001338,NM_001040114,NM_001040113,NM_144573,NM_002471,NM_001202	true	-0.471767	6.99231e-05
synapse organization(GO:0050808)	140	331	NM_004210,NM_012431,NM_012437,NM_014718,NM_004360,NM_014728,BC014432,NM_014767,NM_004389,NM_004386,NM_014893,NM_013366,NM_014932,NM_173660,NM_173728,NM_020919,NM_003087,NM_003061,NM_020987,NM_001011515,NM_001278252,NM_020806,NM_006160,NM_001256429,NM_001080457,NM_001005388,NM_001080421,NM_172082,NM_006078,NM_020795,NM_007033,NM_001010908,NM_020549,NM_012309,NM_000069,NM_005045,NM_201591,NM_000916…	true	-0.161429	7.07431e-05
microtubule anchoring(GO:0034453)	42	136	NM_004217,NM_173830,NM_014679,NM_018098,NM_014810,NM_004393,NM_044472,NM_006197,NM_006101,NM_001080429,NM_001032293,NM_001039802,NM_007045,NM_012237,NM_001271853,NM_000038,NM_198393,NM_006461,NM_170589,NM_000321,NM_018715,NM_016350,NM_013277,NM_001098507,NM_001142761,NM_015250,NM_001015878,NM_015282,NM_001007793,NM_031966,NM_001714,NM_001012410,NM_001013437,NM_031216,NM_181453,NM_033028,NM_144600…	true	0.193235	7.20154e-05
bone mineralization(GO:0030282)	89	189	NM_001178117,NM_004329,NM_013372,NM_014963,NM_006157,NM_001005340,NM_001032280,NM_020638,NM_001024736,NM_000024,NM_001190839,NM_000963,NM_000900,NM_000142,NM_000165,NM_000230,NM_001164617,NM_014080,NM_020223,NM_000315,NM_006208,NM_000346,NM_020127,NM_000400,NM_017680,NM_000474,NM_054027,NM_018490,NM_005454,NM_030761,NM_001025295,NM_000618,NM_022970,NM_000660,NM_030756,NM_016038,NM_016085,NM_19917…	true	-0.197527	7.53502e-05
replication fork processing(GO:0031297)	12	23	NM_144998,NM_013432,NM_020937,NM_000057,NM_198468,NM_005131,NM_014140,NM_000489,NM_000553,NM_199294,NM_032143,NM_152683	true	0.245931	7.56088e-05
nucleotide-binding oligomerization domain containing signaling pathway(GO:0070423)	34	92	NM_052814,NM_052813,NM_021975,NM_006116,NM_006092,NM_001032288,NM_020529,NM_018955,NM_006290,NM_021009,NM_015093,NM_138348,NM_015247,NM_002954,NM_153497,NM_002758,NM_022162,NM_001570,NM_001569,NM_001556,NM_031483,NM_145065,NM_138554,NM_152787,NM_003821,NM_145803,NM_003188,NM_001033930,NM_033355,NM_033358,NM_001278,NM_001165,NM_001166,NM_003348	true	0.202119	7.86974e-05
regulation of cardiac muscle cell membrane potential(GO:0086036)	6	18	NM_014600,NM_001256022,NM_024959,NM_001681,NM_002667,NM_001148	true	-0.533001	7.87983e-05
embryonic morphogenesis(GO:0048598)	496	919	NM_004235,NM_173843,NM_173849,NM_007212,NM_018083,NM_014633,NM_014632,NM_018055,NM_018013,NM_018010,NM_001271938,NM_012482,NM_012476,NM_004324,NM_004329,NM_004327,NM_014740,NM_007129,NM_018190,NM_014795,NM_057168,NM_004380,NM_004370,NM_019885,ENST00000394967,NM_173689,NM_004087,NM_007353,NM_003015,NM_003030,NM_003012,NM_003013,NM_020909,NM_020975,NM_003036,NM_021926,NM_021973,NM_021962,NM_012090,…	true	-0.0876203	8.24083e-05
mammary gland formation(GO:0060592)	10	19	NM_001010848,NM_000168,NM_022970,NM_016569,NM_005994,ENST00000359354,NM_181458,NM_001202,NM_002336,NM_004465	true	-0.45307	8.32857e-05
cell-matrix adhesion(GO:0007160)	194	575	NM_014634,NM_012431,NM_001278344,NM_007112,NM_144966,NM_007124,NM_007170,NM_001099401,NM_001034954,NM_001243756,NM_001257389,NM_001033047,NM_013427,NM_003012,NM_007361,NM_020909,NM_004148,NM_013993,NM_012090,NM_006125,NM_001080435,NM_001080437,NM_021871,NM_012192,NM_207191,NM_207197,NM_001010887,NM_001135000,NM_172212,NM_172210,ENST00000401884,NM_000029,NM_000020,NM_000077,NM_000090,NM_018890,NM_…	true	-0.137093	8.59548e-05
epithelial cell migration(GO:0010631)	168	409	NM_004235,NM_014634,NM_014707,NM_007127,NM_014795,NM_007178,NM_004390,NM_001080391,NM_013355,NM_013372,NM_004093,NM_014909,NM_019839,NM_020909,NM_012090,NM_006080,NM_006044,NM_001113490,NM_001017967,NM_001024847,NM_000029,NM_000042,NM_000039,NM_000020,NM_020441,NM_005044,NM_005022,NM_000963,NM_133265,NM_199418,NM_001024629,NM_199461,NM_006419,NM_000267,NM_000245,NM_000222,NM_006384,NM_000212,NM_0…	true	-0.146665	8.61071e-05
epithelium migration(GO:0090132)	168	409	NM_004235,NM_014634,NM_014707,NM_007127,NM_014795,NM_007178,NM_004390,NM_001080391,NM_013355,NM_013372,NM_004093,NM_014909,NM_019839,NM_020909,NM_012090,NM_006080,NM_006044,NM_001113490,NM_001017967,NM_001024847,NM_000029,NM_000042,NM_000039,NM_000020,NM_020441,NM_005044,NM_005022,NM_000963,NM_133265,NM_199418,NM_001024629,NM_199461,NM_006419,NM_000267,NM_000245,NM_000222,NM_006384,NM_000212,NM_0…	true	-0.146665	8.61071e-05
muscle contraction(GO:0006936)	270	671	NM_001256022,NM_001037341,NM_001278344,NM_052862,NM_004272,NM_004318,ENST00000383718,NM_007124,NM_001099404,NM_001011717,NM_001034954,ENST00000334082,NM_001243756,NM_013353,NM_019859,NM_004087,NM_013451,NM_020988,NM_003047,NM_001267550,NM_021995,NM_021935,NM_174934,NM_020856,NM_001039966,NM_134269,NM_079420,NM_006056,NM_006063,NM_006037,NM_012134,NM_001204218,NM_173201,NM_012282,NM_207032,ENST000…	true	-0.116751	9.11589e-05
cell migration in hindbrain(GO:0021535)	12	25	NM_004389,NM_006237,NM_133376,NM_016269,NM_025179,NM_016564,NM_182896,NM_017789,NM_003565,NM_003924,NM_002336,NM_004422	true	-0.425283	9.19526e-05
sprouting angiogenesis(GO:0002040)	51	125	NM_004235,NM_012431,NM_014707,NM_013372,NM_004093,NM_007036,NM_000020,NM_000963,NM_001024629,NM_006384,NM_005251,NM_133459,NM_133468,NM_001004354,NM_017617,NM_022334,NM_133376,NM_016269,NM_000459,NM_019074,NM_133631,ENST00000360635,NM_018222,NM_001503,NM_138348,NM_005854,NM_015167,NM_032777,NM_015401,NM_002757,NM_002632,NM_203394,NM_003966,NM_024756,NM_001191323,NM_024680,NM_173174,NM_002020,NM_0…	true	-0.247595	9.7936e-05
regulation of syncytium formation by plasma membrane fusion(GO:0060142)	17	37	NM_019618,NM_014601,NM_052863,NM_001127184,NM_030788,NM_006795,NM_080721,NM_001202519,NM_001565,NM_003643,NM_003879,NM_001040033,NM_003816,NM_004864,NM_002479,NM_002478,NM_002416	true	0.229996	9.95222e-05
regulation of autophagy(GO:0010506)	92	230	NM_018031,NM_014683,NM_001271943,NM_004322,NM_014781,NM_007162,NM_001099436,NM_004394,NM_013325,NM_014924,NM_004052,NM_007314,NM_007313,NM_014991,NM_006118,NM_020773,NM_020775,NM_012238,NM_012237,NM_020375,NM_000271,NM_006395,NM_006219,NM_006252,NM_005157,NM_005163,NM_014169,NM_001136001,NM_001025300,NM_000546,NM_021020,NM_006913,NM_148893,NM_000633,NM_013258,NM_006852,NM_014326,NM_199181,NM_0212…	true	-0.191481	0.000101161
calcium-dependent cell-cell adhesion via plasma membrane cell adhesion molecules(GO:0016339)	25	58	NM_004360,NM_014932,NM_004062,NM_004063,NM_144779,NM_014970,NM_018930,NM_018939,NM_018934,NM_018933,NM_018931,NM_018938,NM_018936,ENST00000392217,NM_021248,NM_016580,NM_001670,NM_032876,NM_015669,NM_001942,NM_001792,NM_001001485,NM_003737,NM_032098,NM_032402	true	-0.327523	0.00010149
glucose import(GO:0046323)	57	136	NM_004277,NM_001034954,NM_019884,NM_004171,NM_012096,NM_012249,NM_012215,NM_000189,NM_001164617,NM_000208,NM_000207,NM_000315,NM_000368,NM_006208,NM_017625,NM_005163,NM_198184,NM_005117,NM_016203,NM_018445,NM_000594,NM_000618,NM_019113,NM_005304,NM_000794,NM_001272043,NM_005619,NM_016154,NM_006628,NM_005544,NM_018368,AF307332,NM_031908,NM_002959,NM_023083,NM_023085,NM_002889,NM_001310,NM_002834,N…	true	-0.23517	0.000107153
fibroblast growth factor receptor signaling pathway(GO:0008543)	192	498	NM_078467,NM_004214,NM_014679,NM_012428,NM_004333,NM_004322,NM_019884,NM_001278160,NM_207578,NM_019851,NM_004036,NM_004064,NM_004113,NM_003029,NM_007373,NM_001174066,NM_020963,NM_020996,NM_004157,NM_001257206,NM_006139,NM_012154,NM_012199,NM_020638,NM_020637,NM_013982,NM_207123,NM_020546,NM_005027,NM_018837,NM_005026,NM_005020,NM_001024630,NM_000924,NM_000142,NM_022475,NM_018955,NM_000222,NM_0217…	true	-0.135704	0.000110806
soft palate development(GO:0060023)	7	17	NM_001163771,NM_080647,NM_080646,NM_005786,NM_080680,NM_003108,NM_004473	true	-0.499737	0.000120022
nephric duct development(GO:0072176)	11	24	NM_001164617,NM_000296,NM_000297,NM_017651,NM_001002295,NM_001009944,NM_003990,NM_145260,NM_004626,NM_001202,NM_003396	true	-0.432088	0.000124539
regulation of necroptotic process(GO:0060544)	13	29	NM_001127184,NM_006871,NM_001202519,NM_001162383,NM_031229,NM_003651,NM_003879,NM_003824,NM_003804,NM_004723,NM_001165,NM_001166,NM_001151	true	0.238582	0.000135851
regulation of cell morphogenesis(GO:0022604)	381	922	NM_001256012,NM_007283,NM_007284,NM_014683,NM_018014,NM_001271938,NM_012431,NM_014714,NM_004263,NM_004333,NM_004343,NM_004309,NM_007127,NM_018138,NM_014780,NM_007167,NM_007178,NM_001206540,NM_001243756,NM_001080395,NM_013372,NM_013366,NM_019850,NM_173689,NM_004034,NM_004086,NM_007353,NM_004114,NM_020929,NM_003030,NM_001037442,NM_003012,NM_003013,NM_020909,NM_020975,NM_003061,NM_001011515,NM_02099…	true	-0.0963416	0.000139743
antigen processing and presentation of peptide antigen via MHC class I(GO:0002474)	101	391	NM_014614,NM_018009,NM_004343,NM_018144,NM_014814,NM_013336,NM_004048,NM_004079,NM_004106,NM_004159,NM_175932,NM_021982,NM_001242758,NM_001033503,NM_001163942,NM_001163993,NM_172208,NM_005047,NM_018833,NM_006503,NM_000101,NM_018950,NM_018955,NM_000265,NM_006332,NM_006323,NM_006310,NM_006364,NM_022350,NM_000386,NM_000397,NM_006263,NM_000410,NM_000433,NM_148976,NM_001098478,NM_021009,NM_000593,NM_0…	true	-0.179531	0.000148974
TRIF-dependent toll-like receptor signaling pathway(GO:0035666)	74	225	NM_180976,NM_001114123,NM_004090,NM_004031,NM_001174104,NM_003010,NM_021975,NM_006116,NM_006092,NM_001278548,NM_001278547,NM_001135044,NM_020529,NM_181886,NM_018955,NM_005252,NM_005229,NM_001288724,NM_005171,NM_138980,NM_138957,NM_134442,NM_001257168,NM_021009,NM_006871,NM_013254,NM_015093,NM_021135,NM_001281435,NM_002953,NM_002954,NM_001394,NM_153497,NM_002758,NM_002755,NM_002752,NM_002751,NM_02…	true	0.161958	0.000149802
nuclear pore complex assembly(GO:0051292)	7	18	NM_018087,NM_001278209,NM_020401,NM_005387,NM_016320,NM_015135,NM_015446	true	0.261744	0.000152692
inner ear development(GO:0048839)	150	235	ENST00000374057,NM_018013,NM_004277,NM_004364,NM_004360,NM_004327,NM_007123,NM_014839,NM_019851,NM_004064,NM_021911,NM_021962,NM_006161,NM_006120,NM_001080476,NM_001032280,NM_001080508,NM_207361,NM_012259,NM_001010926,NM_020402,NM_182983,NM_018890,NM_017420,NM_017433,NM_017412,NM_000168,NM_000193,NM_020335,NM_006401,NM_000260,NM_000263,NM_021728,NM_005247,NM_014080,NM_005221,NM_018659,NM_000307,N…	true	-0.149299	0.000154829
negative regulation of interferon-gamma-mediated signaling pathway(GO:0060336)	5	22	NM_007121,NM_005693,NM_002828,NM_138711,NM_080423	true	0.274101	0.000162175
negative regulation of response to interferon-gamma(GO:0060331)	5	22	NM_007121,NM_005693,NM_002828,NM_138711,NM_080423	true	0.274101	0.000162175
histone lysine demethylation(GO:0070076)	32	74	NM_014663,NM_018039,NM_007125,ENST00000377803,NM_004187,NM_021968,NM_001080424,NM_001005366,ENST00000381306,NM_012308,AB031230,NM_001034077,NM_018433,NM_005392,NM_015061,NM_015013,NM_006618,ENST00000382893,NM_032590,NM_015107,NM_030647,NM_001184898,NM_182660,NM_003540,NM_003543,NM_003542,NM_003547,NM_175054,NM_004653,NM_001145348,NM_003337,NM_001146702	true	0.199702	0.000164086
response to virus(GO:0009615)	293	743	ENST00000262259,NM_173847,NM_018082,NM_018026,NM_001030007,NM_012420,NM_052813,NM_004331,NM_018119,NM_004335,NM_004322,NM_007147,NM_007199,NM_001206491,NM_004393,NM_013351,ENST00000334163,NM_004031,NM_004068,NM_004052,NM_004048,NM_144701,NM_007329,NM_134323,NM_021975,NM_012073,NM_006187,NM_020865,NM_006139,NM_001080466,NM_021804,NM_006074,NM_006084,NM_021822,NM_020746,NM_007055,NM_007040,NM_00103…	true	0.0983503	0.000167432
tissue migration(GO:0090130)	172	414	NM_004235,NM_014634,NM_014707,NM_007127,NM_014795,NM_007178,NM_004390,NM_001080391,NM_013355,NM_013372,NM_004093,NM_014909,NM_019839,NM_020909,NM_012090,NM_001039958,NM_006080,NM_006044,NM_001113490,NM_001017967,NM_001024847,NM_000029,NM_000042,NM_000039,NM_000020,NM_020441,NM_005044,NM_005022,NM_000963,NM_133265,NM_199418,NM_001024629,NM_199461,NM_006419,NM_000267,NM_000245,NM_000222,NM_006384,N…	true	-0.139244	0.00016914
positive regulation of neutrophil migration(GO:1902624)	20	27	NM_004054,NM_004139,NM_018890,NM_006274,NM_148910,NM_005337,NM_000584,NM_002995,NM_002989,NM_002872,NM_016584,NM_001025158,NM_001557,NM_001957,NM_001955,NM_001838,NM_001039661,NM_003248,NM_001212,ENST00000378845	true	0.219496	0.000170066
positive regulation of neutrophil chemotaxis(GO:0090023)	20	27	NM_004054,NM_004139,NM_018890,NM_006274,NM_148910,NM_005337,NM_000584,NM_002995,NM_002989,NM_002872,NM_016584,NM_001025158,NM_001557,NM_001957,NM_001955,NM_001838,NM_001039661,NM_003248,NM_001212,ENST00000378845	true	0.219496	0.000170066
T cell chemotaxis(GO:0010818)	15	29	NM_005026,NM_006419,NM_005409,NM_001142797,NM_002995,NM_002963,NM_022059,NM_002649,NM_001565,NM_001123041,NM_178518,NM_001123396,NM_003183,NM_001110,NM_003392	true	0.231132	0.00017263
regulation of cartilage development(GO:0061035)	48	98	ENST00000471755,NM_003030,NM_003068,NM_021975,NM_006006,NM_012201,NM_000020,NM_000965,NM_000966,NM_000941,NM_001024630,NM_000168,NM_000230,NM_017508,NM_000346,NM_014112,NM_005450,NM_014272,NM_000660,NM_199141,NM_001098210,NM_021192,NM_005523,NM_030955,NM_138370,NM_001463,NM_001718,NM_005902,NM_198965,NM_030650,NM_001554,NM_001901,NM_001904,NM_016932,NM_033128,NM_002181,NM_003862,NM_004626,NM_0046…	true	-0.245975	0.000176237
substantia nigra development(GO:0021762)	46	133	NM_004209,NM_004347,NM_014866,NM_007365,NM_001037494,NM_044472,NM_021964,NM_001039802,NM_012237,NM_022491,NM_006317,NM_005271,NM_005184,NM_006271,NM_021629,NM_001003703,NM_000402,NM_005347,NM_006888,NM_006826,NM_006761,NM_000898,NM_005566,NM_022757,NM_032538,NM_025189,NM_032727,NM_001743,NM_002853,NM_001688,NM_001664,NM_001025100,NM_001025101,NM_001006617,NM_001006618,NM_001976,NM_001863,NM_00182…	true	-0.249869	0.000182668
chromatin remodeling(GO:0006338)	122	347	NM_018063,NM_014614,NM_007276,NM_007280,NM_004284,NM_018132,ENST00000377803,NM_001114121,NM_014952,NM_007344,NM_013448,NM_013449,NM_020920,NM_007365,NM_003074,NM_003073,NM_003072,NM_003079,NM_003078,NM_001037738,NM_021968,NM_001100625,NM_001100624,NM_006037,NM_006015,NM_020732,NM_012102,NM_020699,NM_012238,NM_001122742,NM_207189,NM_013945,NM_012387,NM_006563,NM_000077,NM_001128429,NM_006473,NM_00…	true	0.136707	0.000187751
reciprocal meiotic recombination(GO:0007131)	43	110	NM_004237,NM_012444,NM_144998,NM_057161,NM_001205262,NM_020937,NM_007068,NM_012415,NM_001017975,NM_000051,NM_000179,NM_000249,NM_000251,NM_133509,NM_133510,NM_005236,NM_020227,NM_006265,NM_133629,NM_001142571,NM_005590,NM_199294,NM_005732,NM_182489,NM_025259,NM_002878,NM_002875,NM_022092,NM_001131034,NM_182852,NM_001003811,NM_194439,NM_001040108,NM_152764,NM_001067,NM_001068,NM_001123225,NM_00244…	true	0.185515	0.000189091
reciprocal DNA recombination(GO:0035825)	43	110	NM_004237,NM_012444,NM_144998,NM_057161,NM_001205262,NM_020937,NM_007068,NM_012415,NM_001017975,NM_000051,NM_000179,NM_000249,NM_000251,NM_133509,NM_133510,NM_005236,NM_020227,NM_006265,NM_133629,NM_001142571,NM_005590,NM_199294,NM_005732,NM_182489,NM_025259,NM_002878,NM_002875,NM_022092,NM_001131034,NM_182852,NM_001003811,NM_194439,NM_001040108,NM_152764,NM_001067,NM_001068,NM_001123225,NM_00244…	true	0.185515	0.000189091
protein maturation by protein folding(GO:0022417)	9	13	NM_004343,NM_019891,NM_006005,NM_006406,NM_054014,NM_054033,NM_000801,NM_003977,NM_144636	true	-0.452596	0.000191752
chemokine production(GO:0032602)	60	119	NM_004235,NM_007275,NM_001206491,NM_003068,NM_004139,NM_021805,NM_020746,NM_017442,NM_005242,NM_005211,NM_000418,NM_148910,NM_016232,NM_000474,NM_005373,NM_000576,NM_000565,NM_000594,NM_000589,NM_000600,NM_000619,NM_013258,NM_000676,NM_005304,NM_005306,NM_001142797,NM_000852,NM_001504,NM_002965,NM_002964,NM_001356,NM_016562,NM_001700,NM_001735,NM_002759,NM_002757,NM_001647,NM_022162,NM_001025158,…	true	0.170083	0.000191803
neurotrophin signaling pathway(GO:0038179)	288	807	NM_078467,NM_180976,NM_012454,NM_012435,NM_052843,NM_004346,NM_004333,NM_019555,NM_004309,NM_004322,NM_007118,NM_014786,NM_007096,NM_018098,NM_001278497,NM_019884,NM_001114123,NM_001278160,NM_207578,NM_004090,NM_019851,NM_019850,NM_004036,NM_004068,NM_004064,NM_003029,NM_003026,NM_001174066,NM_003080,NM_020963,NM_020996,NM_004157,NM_001257206,NM_021975,NM_021962,NM_006180,NM_006113,NM_006139,NM_0…	true	-0.107943	0.000194046
autophagic vacuole assembly(GO:0000045)	39	91	NM_007278,NM_007285,NM_014683,NM_018036,NM_014741,NM_014781,NM_001099436,NM_013325,NM_014924,NM_004161,NM_021934,NM_020773,NM_020775,NM_001033518,NM_000021,NM_022488,NM_001004343,NM_014169,NM_016277,NM_006913,NM_030803,NM_022818,NM_021202,NM_030981,NM_001014764,NM_015104,NM_032852,NM_002647,NM_015610,NM_001077198,NM_031412,NM_031296,NM_003565,NM_003766,NM_178326,NM_004849,NM_001205119,NM_004637,N…	true	-0.266376	0.000195521
regulation of epithelial cell migration(GO:0010632)	123	306	NM_004235,NM_014634,NM_014707,NM_007127,NM_007178,NM_004390,NM_001080391,NM_014909,NM_020909,NM_012090,NM_006080,NM_006044,NM_001113490,NM_001017967,NM_001024847,NM_000029,NM_000042,NM_000020,NM_005022,NM_000963,NM_133265,NM_199418,NM_001024629,NM_006419,NM_000267,NM_000245,NM_006384,NM_000212,NM_005251,NM_022343,NM_005238,NM_198098,NM_022367,NM_133459,NM_133468,NM_017617,NM_001002295,NM_000346,N…	true	-0.161198	0.000198255
bronchus development(GO:0060433)	8	13	NM_012391,NM_001024847,NM_006408,NM_058238,NM_019102,NM_001012426,NM_002188,NM_001202	true	-0.469081	0.000199713
regulation of receptor binding(GO:1900120)	13	34	NM_018058,NM_006167,NM_207191,NM_207197,NM_001024629,NM_022469,NM_006226,NM_016269,NM_005450,NM_006666,NM_002840,NM_003873,NM_004797	true	-0.400222	0.000200011
negative regulation of extrinsic apoptotic signaling pathway via death domain receptors(GO:1902042)	27	59	NM_007262,NM_007300,NM_003013,NM_021871,NM_001017368,NM_000201,NM_201397,NM_001127184,NM_005141,NM_006290,NM_000447,NM_000508,NM_000509,NM_021073,NM_000603,NM_000602,NM_002880,NM_001202519,NM_001162383,NM_022152,NM_194271,NM_033129,NM_002133,NM_003879,NM_004938,NM_003768,NM_004723	true	0.205627	0.000200768
RIG-I signaling pathway(GO:0039529)	16	28	NM_020746,NM_017631,NM_020119,NM_201402,NM_014314,NM_024119,NM_015578,NM_024625,NM_033229,NM_001282144,NM_001256872,NM_001256873,NM_001256869,NM_001212,NM_001165,NM_001166	true	0.227411	0.000201212
homotypic cell-cell adhesion(GO:0034109)	71	210	NM_004214,NM_007269,NM_004363,NM_004078,NM_020987,NM_021871,NM_006378,NM_000212,NM_014000,NM_006216,NM_006219,NM_006206,NM_001142287,NM_006254,NM_006257,NM_006258,NM_006289,NM_005141,NM_006293,NM_000419,NM_000508,NM_000509,NM_000518,NM_000576,NM_000610,NM_014331,NM_005328,NM_000697,NM_199355,NM_022788,NM_000820,NM_018366,NM_005704,NM_001456,NM_001014795,NM_002965,NM_002964,NM_002872,NM_002886,NM_…	true	-0.206169	0.000204519
peptidyl-tyrosine autophosphorylation(GO:0038083)	10	70	NM_001080395,NM_013372,NM_013993,NM_000208,NM_000875,NM_080823,NM_001202522,NM_001191323,NM_173174,NM_002253	true	-0.436156	0.00020487
vesicle fusion(GO:0006906)	40	81	NM_012437,NM_014802,NM_014832,NM_003037,NM_001257999,NM_006152,NM_006113,NM_020783,NM_020665,NM_006496,NM_017516,NM_014178,NM_005370,NM_000700,NM_005639,NM_005638,NM_030907,NM_005868,NM_005819,NM_002866,NM_015163,NM_001626,NM_001002857,NM_017817,NM_033120,NM_002088,NM_145206,NM_003715,NM_003761,NM_003762,NM_003765,NM_004853,NM_004781,NM_003164,NM_003165,NM_004637,NM_004604,NM_001233,NM_032298,NM_…	true	-0.262557	0.000210569
exocytosis(GO:0006887)	315	839	NM_004218,NM_007236,NM_007259,NM_007261,NM_007269,NM_007277,NM_001256012,NM_001030005,NM_001030007,NM_012437,AB023136,NM_001278344,NM_004251,NM_004283,NM_004333,NM_004327,NM_001204303,NM_007155,NM_014747,NM_014766,NM_001122606,NM_001257389,NM_175852,NM_014859,NM_014932,NM_014904,NM_007351,NM_004106,NM_007308,NM_003005,NM_014980,NM_014989,NM_003081,NM_004163,NM_004162,NM_004140,NM_004177,NM_001080…	true	-0.10281	0.000210883
regulation of tumor necrosis factor-mediated signaling pathway(GO:0010803)	15	44	NM_182965,NM_000039,NM_001017368,NM_005242,NM_013258,NM_000852,NM_030974,NM_000820,NM_138330,NM_002828,NM_145065,NM_080423,NM_004797,NM_152696,NM_004562	true	0.229645	0.000211486
common-partner SMAD protein phosphorylation(GO:0007182)	6	12	NM_001024847,NM_001003652,NM_000660,NM_033238,NM_003128,NM_001202	true	-0.512031	0.000211517
response to gamma radiation(GO:0010332)	42	114	NM_004324,NM_173475,NM_006106,NM_001204186,NM_207118,NM_000051,NM_000101,NM_000124,NM_001005735,NM_020375,NM_001018115,NM_001002295,NM_006273,NM_000546,NM_000553,NM_006904,NM_130803,NM_005431,NM_005427,NM_000633,NM_006852,NM_000781,NM_206907,NM_024092,NM_002982,NM_001644,NM_001565,NM_001964,NM_001885,NM_145018,NM_138578,NM_001126118,NM_033238,NM_001284363,NM_033084,NM_003722,NM_213590,NM_002467,N…	true	0.185683	0.000214126
glycoprotein biosynthetic process(GO:0009101)	321	848	NM_007210,NM_007236,NM_007255,NM_014674,NM_012461,NM_052859,NM_001034845,NM_004273,NM_004343,NM_004314,NM_144988,NM_007126,NM_007171,NM_001243766,NM_004386,NM_004385,NM_173601,NM_175856,NM_001080393,NM_013338,NM_013339,NM_013335,NM_013352,NM_173654,NM_019886,NM_013382,NM_013388,NM_001101426,NM_014918,NM_014908,NM_007357,NM_013443,NM_003033,NM_003034,NM_144677,NM_001243564,NM_001244710,NM_00100412…	true	-0.101623	0.000218892
receptor-mediated endocytosis(GO:0006898)	189	506	NM_004244,NM_173833,NM_007229,NM_019601,NM_004313,NM_014748,NM_007166,NM_001257389,NM_013372,NM_014911,NM_004041,NM_144707,NM_007329,NM_013437,NM_007308,NM_003019,NM_003014,NM_003026,ENST00000315571,NM_007366,NM_014999,NM_004162,NM_174936,NM_174941,NM_174919,NM_001005360,NM_006025,NM_207345,NM_001044305,NM_001038633,NM_001010938,NM_012242,NM_001100812,NM_001024948,NM_012407,NM_001004057,NM_012398…	true	-0.130942	0.000219815
endoplasmic reticulum unfolded protein response(GO:0030968)	87	198	NM_014685,NM_014674,NM_004287,NM_004324,NM_004343,NM_007126,NM_014760,NM_014780,NM_057161,NM_019884,NM_013388,NM_004094,NM_004082,NM_004083,NM_007348,NM_003029,NM_001244710,NM_006164,NM_006005,NM_012328,NM_172230,NM_005080,NM_000018,NM_020470,NM_198440,NM_006368,NM_170707,NM_000391,NM_006244,NM_006289,NM_014189,NM_001257145,NM_018445,NM_005347,NM_000596,NM_000584,NM_000619,NM_019107,NM_016306,NM_…	true	-0.187244	0.000225358
positive regulation of BMP signaling pathway(GO:0030513)	25	56	NM_173689,NM_020648,NM_001010926,ENST00000359999,NM_000020,NM_000118,NM_001164617,NM_001003652,NM_017617,NM_005359,NM_005524,NM_203284,NM_001014795,NM_015170,NM_022066,NM_022153,NM_024326,NM_001554,NM_024408,NM_002052,NM_002448,NM_002449,NM_003108,NM_001202,NM_001204	true	-0.314521	0.000228849
regulation of granulocyte chemotaxis(GO:0071622)	34	56	NM_004054,NM_004072,NM_004139,NM_020672,NM_001271749,NM_018890,NM_006274,NM_148910,NM_001142343,NM_005337,NM_000589,NM_000584,NM_002995,NM_002989,NM_002982,NM_002963,NM_002872,NM_002889,NM_016584,NM_002843,NM_022162,NM_001025158,NM_001557,NM_001957,NM_001955,NM_001166461,NM_001838,NM_001039661,NM_003248,NM_003246,NM_004787,NM_002436,NM_001212,ENST00000378845	true	0.194617	0.000229375
neurotrophin TRK receptor signaling pathway(GO:0048011)	282	793	NM_078467,NM_180976,NM_012454,NM_012435,NM_052843,NM_004346,NM_004333,NM_019555,NM_004309,NM_004322,NM_007118,NM_014786,NM_007096,NM_018098,NM_001278497,NM_019884,NM_001114123,NM_001278160,NM_207578,NM_004090,NM_019851,NM_019850,NM_004036,NM_004068,NM_004064,NM_003029,NM_003026,NM_001174066,NM_003080,NM_020963,NM_020996,NM_004157,NM_001257206,NM_021975,NM_021962,NM_006180,NM_006113,NM_006139,NM_0…	true	-0.107743	0.000232174
heart valve morphogenesis(GO:0003179)	22	49	NM_012259,NM_000192,NM_017617,NM_001002295,NM_000346,NM_000474,NM_005359,NM_001142620,NM_014571,NM_001166220,NM_001554,NM_024408,NM_002052,NM_001199042,NM_001040708,NM_003107,NM_002397,NM_001200,NM_153813,NM_002230,NM_001105,NM_004428	true	-0.329449	0.000235945
lymphocyte chemotaxis(GO:0048247)	25	50	NM_007365,NM_001100812,NM_005026,NM_006419,NM_000331,NM_006273,ENST00000006053,NM_005409,NM_001142797,NM_000820,NM_002995,NM_002982,NM_002963,NM_022059,NM_002649,NM_001565,NM_016951,NM_173174,NM_001123041,NM_178518,NM_001123396,NM_003183,NM_001110,NM_001109,NM_003392	true	0.207709	0.00023682
regulation of cellular response to growth factor stimulus(GO:0090287)	159	372	NM_014694,NM_012428,NM_052872,NM_144997,NM_007178,NM_001257389,NM_013451,NM_003036,NM_004143,NM_006079,NM_012193,NM_012245,NM_012238,NM_012201,NM_001037802,NM_012342,NM_001024847,NM_000029,NM_020429,NM_000076,NM_018837,NM_001024630,NM_000118,NM_000138,NM_022475,NM_018955,NM_198400,NM_006419,NM_006313,NM_000212,NM_021728,NM_020223,NM_001003652,NM_020182,NM_133459,NM_133493,NM_000379,NM_006221,NM_0…	true	-0.141369	0.000237199
membrane raft assembly(GO:0001765)	8	25	NM_007229,NM_002966,NM_015150,NM_001753,NM_001002857,NM_001184970,NM_001234,NM_001233	true	-0.464934	0.000244043
obsolete positive regulation of GTP catabolic process(GO:0033126)	12	25	NM_014688,NM_014629,NM_014853,NM_001172435,NM_012233,NM_001258457,NM_005665,NM_015279,NM_016495,NM_015705,NM_145245,NM_144628	true	-0.407268	0.000245043
negative regulation of tumor necrosis factor-mediated signaling pathway(GO:0010804)	10	24	NM_000039,NM_001017368,NM_005242,NM_000852,NM_000820,NM_138330,NM_002828,NM_145065,NM_080423,NM_004797	true	0.244505	0.000245571
positive regulation of heart rate by epinephrine-norepinephrine(GO:0001996)	5	11	NM_000366,NM_000679,NM_000684,NM_001018004,NM_001018005	true	-0.538127	0.000246913
toll-like receptor 3 signaling pathway(GO:0034138)	82	239	NM_180976,NM_001114123,NM_004090,NM_004031,NM_001174104,NM_003010,NM_021975,NM_006116,NM_006092,NM_001278548,NM_001278547,NM_020651,NM_001135044,NM_020529,NM_181886,NM_018955,NM_005252,NM_005242,NM_005229,NM_001288724,NM_005171,NM_006290,NM_138980,NM_138957,NM_134442,NM_148910,NM_001257168,NM_021009,NM_006871,NM_013254,NM_015093,NM_021135,NM_030930,NM_001281435,NM_002953,NM_002954,NM_001394,NM_01…	true	0.153245	0.000258645
diencephalon development(GO:0021536)	109	233	NM_004209,NM_004347,NM_004360,NM_004324,NM_004329,NM_014866,NM_001136271,NM_013435,NM_007365,NM_001037494,NM_044472,NM_021964,NM_006186,NM_001172435,NM_006080,NM_012182,NM_001039802,NM_012233,NM_012237,NM_022491,NM_000193,NM_006317,NM_006311,NM_005270,NM_005271,NM_005269,NM_021728,NM_014080,NM_006237,NM_005184,NM_006261,NM_005149,NM_006271,NM_021629,NM_134442,NM_014141,NM_001003703,NM_000402,NM_0…	true	-0.167429	0.000261209
cardiac septum development(GO:0003279)	60	125	NM_004239,NM_012082,NM_006079,NM_021818,NM_020733,NM_012259,NM_000965,NM_000192,NM_020335,NM_005257,NM_017617,NM_001002295,NM_133330,NM_000522,NM_005359,NM_022970,NM_001142620,NM_006769,NM_018222,NM_005631,NM_022768,NM_005524,NM_014571,NM_080647,NM_080646,NM_153240,NM_001466,NM_002968,NM_016569,NM_005994,NM_022051,NM_001166220,NM_002763,NM_001166175,NM_001554,NM_024408,NM_015513,ENST00000359354,N…	true	-0.21839	0.000265281
polyol catabolic process(GO:0046174)	16	37	NM_019892,NM_000167,NM_000314,NM_017584,NM_014214,NM_006703,NM_005536,ENST00000267814,NM_001144879,NM_033214,NM_001039547,NM_001083112,NM_175732,NM_003104,NM_001205019,NM_004686	true	0.225289	0.00026794
prostatic bud formation(GO:0060513)	8	13	NM_000044,NM_000193,NM_005450,NM_015170,NM_003722,NM_001202,NM_003392,NM_004465	true	-0.462902	0.00026886
positive regulation of phosphatase activity(GO:0010922)	21	40	NM_007261,NM_004274,NM_012301,NM_133263,NM_005184,NM_000619,NM_006871,NM_006888,NM_000686,NM_001503,NM_001743,NM_022097,NM_005902,NM_002664,NM_178001,NM_004972,NM_181501,NM_002609,NM_002397,NM_001200,NM_002203	true	-0.33265	0.0002726
single organismal cell-cell adhesion(GO:0016337)	322	828	NM_004214,NM_004235,NM_173843,NM_001122679,NM_173808,NM_007269,NM_018055,NM_018012,NM_001206609,NM_004363,NM_004360,NM_004361,ENST00000400546,NM_007183,ENST00000471755,NM_004389,NM_014893,NM_014932,NM_001206885,NM_001033047,NM_004087,NM_004078,NM_007314,NM_007313,NM_144779,NM_003005,NM_014970,NM_020909,NM_020975,NM_003068,NM_020987,NM_020996,NM_012092,NM_012072,NM_021932,NM_001080461,NM_001080429…	true	-0.0999042	0.000274782
negative regulation of cell adhesion(GO:0007162)	118	299	NM_004235,NM_173843,NM_012431,NM_004360,NM_004309,NM_013427,NM_007314,NM_007313,NM_144779,NM_020909,NM_003068,NM_001271534,NM_006125,NM_012193,NM_006016,NM_001030288,NM_020693,NM_207191,NM_207197,NM_001010887,NM_012335,NM_012341,NM_000039,NM_000020,NM_000077,NM_000050,NM_000088,NM_000922,NM_001270408,NM_006341,NM_001286351,NM_000261,NM_006378,NM_021721,NM_000314,NM_000301,NM_006216,NM_017617,NM_0…	true	-0.16079	0.000277371
gland morphogenesis(GO:0022612)	103	163	NM_004360,NM_004324,NM_003014,NM_003012,NM_006167,NM_006080,NM_001010931,NM_001010934,NM_020648,NM_001122742,NM_001010848,NM_001024847,ENST00000330233,NM_000044,NM_000966,NM_000926,NM_000168,NM_000193,NM_006379,NM_001079675,NM_006361,NM_014080,NM_005228,NM_005211,NM_017617,NM_000346,NM_006261,NM_022336,NM_000522,NM_000523,NM_005450,NM_030761,NM_000599,NM_000594,NM_000610,NM_000633,NM_022970,NM_00…	true	-0.17113	0.000278014
substrate adhesion-dependent cell spreading(GO:0034446)	70	146	NM_018059,NM_004333,NM_004343,NM_001243756,NM_014875,NM_007313,NM_004161,NM_044472,NM_020820,NM_021913,NM_021871,NM_012193,NM_001039802,NM_020642,NM_001135000,NM_000039,NM_005052,NM_018890,NM_000261,NM_006384,NM_000212,NM_005246,NM_005232,NM_017640,NM_005141,NM_018715,NM_006293,NM_022334,NM_147147,NM_000459,NM_054034,NM_000508,NM_000509,NM_018569,ENST00000360635,NM_018222,NM_000889,NM_000885,NM_0…	true	-0.203525	0.000279011
cellular response to unfolded protein(GO:0034620)	90	209	NM_014685,NM_014674,NM_004287,NM_004324,NM_004343,NM_007126,NM_014760,NM_014780,NM_057161,NM_019884,NM_013388,NM_004094,NM_004082,NM_004083,NM_007348,NM_003029,NM_001244710,NM_006164,NM_006005,NM_012328,NM_172230,NM_005080,NM_000018,NM_020470,NM_198440,NM_006368,NM_170707,NM_000391,NM_006244,NM_006289,NM_014189,NM_001257145,NM_018445,NM_005347,NM_000596,NM_000584,NM_000619,NM_019107,NM_016306,NM_…	true	-0.181803	0.000281464
endochondral bone morphogenesis(GO:0060350)	50	78	NM_007112,NM_003030,NM_001024847,NM_000088,NM_000095,NM_000965,NM_000966,NM_000941,NM_001024630,NM_000142,NM_000288,NM_005221,NM_017637,NM_000346,NM_198184,NM_000478,NM_000459,NM_005454,NM_199141,NM_001143804,NM_021192,NM_005529,NM_005523,NM_001014796,NM_001718,NM_005920,NM_005967,NM_005966,NM_080801,NM_005941,NM_032888,NM_001567,NM_017813,NM_024409,NM_001851,NM_001844,NM_001077490,NM_001130518,N…	true	-0.234811	0.000290687
membrane invagination(GO:0010324)	24	65	NM_007261,NM_018053,NM_004106,NM_001024948,NM_018890,NM_006395,NM_005242,NM_016293,NM_005337,NM_019112,NM_016315,NM_005638,NM_005502,NM_001380,NM_005928,NM_001077198,NM_138782,NM_001252668,ENST00000368979,NM_003795,NM_003246,NM_004712,NM_002203,NM_001140	true	-0.315296	0.000291612
membrane to membrane docking(GO:0022614)	5	8	NM_000201,NM_005406,NM_001078,NM_002444,NM_003379	true	0.26948	0.000295014
ribonucleoprotein complex assembly(GO:0022618)	140	413	NM_007204,NM_012423,NM_014706,NM_001243646,NM_014753,NM_018128,NM_018130,NM_007165,NM_007178,NM_001037283,NM_004397,NM_175854,NM_013354,NM_007362,NM_003096,NM_003094,NM_003095,NM_003093,NM_004175,NM_001037738,NM_134323,NM_006110,NM_001005369,ENST00000401695,NM_012118,NM_001037808,NM_012345,NM_005089,NM_006590,NM_148416,NM_006445,NM_006425,NM_017492,NM_006360,NM_014060,NM_014014,NM_019023,NM_00034…	true	0.127004	0.000302726
positive regulation of calcium ion transport into cytosol(GO:0010524)	40	99	NM_004274,NM_004324,NM_004318,NM_007308,NM_007313,NM_001039966,NM_012215,NM_000070,NM_000928,NM_018689,NM_006288,NM_170683,NM_000506,NM_005409,NM_000794,NM_000710,NM_001142797,NM_001504,AF307332,NM_002995,NM_001753,NM_001770,NM_001565,NM_001992,NM_001957,NM_003950,NM_001256796,NM_002188,NM_033277,NM_175080,NM_002561,NM_002559,NM_002613,NM_002416,NM_003130,NM_001188,NM_032467,NM_032466,NM_003304,N…	true	0.185222	0.000306981
myeloid cell development(GO:0061515)	41	83	NM_001244897,NM_006563,NM_005028,NM_000119,NM_000222,NM_014053,NM_020223,NM_001017405,NM_000324,NM_005156,NM_000400,NM_000402,NM_000430,NM_016270,NM_005470,NM_005337,NM_000632,NM_005332,NM_199186,NM_000799,NM_014547,NM_005725,NM_002892,NM_015175,NM_001093772,NM_002834,NM_001978,NM_001002857,NM_024652,NM_003701,NM_002017,NM_001010,NM_213602,NM_004774,NM_003189,NM_003131,NM_002398,NM_002343,NM_1538…	true	-0.254175	0.000309357
metanephric collecting duct development(GO:0072205)	9	19	NM_000296,NM_000297,NM_001009944,NM_058238,NM_000486,NM_003990,NM_004747,NM_001202,NM_003466	true	-0.442765	0.000310625
regulation of lipid storage(GO:0010883)	39	92	NM_007121,NM_013332,NM_207627,NM_020841,NM_001080472,NM_001080432,NM_020529,NM_000064,NM_005036,NM_020376,NM_000237,NM_000212,NM_000384,NM_000567,NM_000594,NM_000600,NM_016006,NM_006795,NM_005693,NM_005502,NM_005505,NM_022776,NM_001013706,NM_025079,NM_002828,NM_203402,NM_001646,NM_138715,NM_138711,NM_003998,NM_080423,NM_003561,NM_033632,NM_002402,NM_002445,NM_001279,NM_032306,NM_004599,NM_002210	true	0.186268	0.000310638
negative regulation of locomotion(GO:0040013)	186	471	NM_004235,NM_007261,NM_018055,NM_004252,NM_004333,NM_004327,NM_004335,NM_004309,NM_019592,NM_007184,NM_144997,NM_007178,NM_004393,NM_001080391,NM_013372,NM_014909,NM_173690,NM_003012,NM_003013,NM_007365,NM_003061,NM_004186,NM_020801,NM_021962,NM_020841,NM_006079,NM_006080,NM_007028,NM_001271749,NM_012216,NM_207191,NM_207197,NM_013943,NM_001017967,NM_001204088,NM_012301,NM_012341,NM_005082,NM_0000…	true	-0.128732	0.000316453
Golgi vesicle budding(GO:0048194)	15	33	NM_078471,NM_004193,NM_199444,NM_017510,NM_001024227,NM_006827,NM_006815,NM_016057,NM_016128,NM_001098398,NM_002740,NM_001655,NM_016451,NM_022130,NM_004766	true	-0.372245	0.000321559
cardiac chamber development(GO:0003205)	112	234	NM_004239,NM_001099404,NM_019884,NM_003030,NM_003013,NM_021973,NM_006174,NM_012082,NM_006079,NM_021818,NM_006015,NM_020733,NM_024915,NM_012259,NM_000965,NM_000910,NM_000192,NM_020335,NM_000256,NM_000258,NM_000257,NM_006379,NM_198056,NM_005251,NM_005257,NM_018670,NM_000366,NM_000364,NM_000363,NM_017617,NM_006237,NM_001002295,NM_000335,NM_133330,NM_000432,NM_054014,NM_000459,NM_006988,NM_000522,NM_…	true	-0.162886	0.000327712
negative regulation of cell proliferation involved in kidney development(GO:1901723)	5	12	NM_144997,NM_001002295,NM_024426,NM_144606,NM_001202	true	-0.531245	0.000329131
negative regulation of BMP signaling pathway(GO:0030514)	38	69	NM_013372,NM_007313,NM_003012,NM_003013,NM_003036,NM_001080500,NM_020648,NM_012242,NM_020634,NM_001204088,NM_020429,NM_000138,NM_022469,NM_133468,NM_017617,NM_005454,NM_005450,NM_005430,NM_014319,NM_030756,NM_001258024,NM_005585,NM_022740,NM_005749,NM_025237,NM_005860,NM_001753,NM_015464,NM_002775,NM_001191323,NM_015906,NM_024865,NM_198570,NM_053044,NM_003505,NM_003741,NM_152654,NM_003392	true	-0.261154	0.000331406
Ras protein signal transduction(GO:0007265)	298	911	NM_078467,NM_004227,NM_014629,NM_014636,NM_018071,NM_014604,NM_007262,NM_012455,NM_012454,NM_012435,NM_052843,NM_018125,NM_004327,NM_019555,NM_004309,NM_004308,NM_018173,NM_007118,NM_014762,NM_007184,NM_014786,NM_144997,NM_057159,NM_018098,NM_014808,NM_001030055,NM_001080395,NM_013385,ENST00000377494,NM_014875,NM_014874,NM_014856,NM_173690,NM_019850,NM_004041,NM_007353,NM_173728,NM_013427,NM_0073…	true	-0.102232	0.00033715
regulation of cell morphogenesis involved in differentiation(GO:0010769)	241	559	NM_007283,NM_007284,NM_014683,NM_018014,NM_001271938,NM_004263,NM_004333,NM_004343,NM_004309,NM_014780,NM_007178,NM_001080395,NM_013372,NM_013366,NM_019850,NM_173689,NM_004114,NM_020929,NM_003030,NM_001037442,NM_003012,NM_003013,NM_020909,NM_020975,NM_003061,NM_001011515,NM_020999,NM_044472,NM_004186,NM_001271534,NM_020820,NM_021914,NM_006168,NM_006180,NM_020851,NM_001256429,NM_020703,NM_172082,N…	true	-0.113094	0.000343096
biomineral tissue development(GO:0031214)	119	246	NM_001178117,NM_004329,NM_013372,NM_014963,NM_006157,NM_001005340,NM_001032280,NM_020638,NM_001024736,NM_000024,NM_001190839,NM_000088,NM_000963,NM_000900,NM_006522,NM_000142,NM_000165,NM_198488,NM_000230,NM_001164617,NM_000200,NM_020203,NM_014080,NM_020223,NM_020184,NM_000315,NM_017565,NM_006208,NM_000346,NM_020127,NM_022334,NM_000400,NM_017680,NM_000478,NM_000474,NM_054027,NM_018490,NM_014208,N…	true	-0.157612	0.000352165
heart morphogenesis(GO:0003007)	184	373	NM_014632,NM_018055,NM_018010,NM_001271938,NM_004329,NM_018190,NM_057168,NM_001099412,NM_019884,NM_003030,NM_003013,NM_003068,NM_020997,NM_001267550,NM_021973,NM_006174,NM_012082,NM_006116,NM_006079,NM_021818,NM_020733,NM_024915,NM_012259,NM_207197,NM_020532,NM_006562,NM_000021,NM_018848,NM_000093,NM_000965,NM_000909,NM_000910,NM_170784,NM_000118,NM_000152,NM_000165,NM_000193,NM_000192,NM_020338,…	true	-0.128013	0.000368898
bud elongation involved in lung branching(GO:0060449)	5	16	NM_172037,NM_022970,ENST00000359354,NM_001202,NM_004465	true	-0.52816	0.000373534
glomerular mesangial cell proliferation(GO:0072110)	5	13	NM_001964,NM_024426,NM_002608,NM_002609,NM_001202	true	-0.52744	0.000384657
endosomal transport(GO:0016197)	192	433	NM_004218,NM_014688,NM_007241,NM_014600,NM_014601,NM_001030007,NM_012437,NM_014710,NM_014700,NM_052870,NM_014748,NM_007166,NM_001278471,ENST00000425020,NM_001257389,NM_013346,NM_013312,NM_013321,NM_014899,NM_014846,NM_014853,NM_014855,NM_014957,NM_014924,NM_014916,NM_001178000,NM_020919,NM_001256185,NM_014999,NM_003099,NM_020964,NM_003054,NM_004162,NM_020829,NM_001257999,NM_001080496,NM_020773,NM…	true	-0.125033	0.000386372
negative regulation of leukocyte migration(GO:0002686)	19	38	NM_007261,NM_013372,NM_007365,NM_001271749,NM_001204088,NM_000022,NM_000958,NM_021073,NM_006896,NM_002982,NM_015192,NM_001735,NM_001190259,NM_001647,NM_182734,NM_001191323,NM_002133,NM_004787,NM_033439	true	-0.33869	0.000386972
T cell migration(GO:0072678)	33	65	NM_005026,NM_006419,NM_005290,NM_005409,NM_000609,NM_006871,NM_013258,NM_199168,NM_000889,NM_000885,NM_001142797,NM_002995,NM_002989,NM_002982,NM_001400,NM_002963,NM_022059,NM_001647,NM_002649,NM_001565,NM_001123041,NM_033054,NM_003824,NM_003820,NM_178518,NM_001079,NM_001123396,NM_003183,NM_001033886,NM_004591,NM_001110,NM_001109,NM_003392	true	0.191968	0.000388971
regulation of insulin secretion(GO:0050796)	164	373	NM_004291,NM_004322,NM_007117,NM_014752,NM_001267843,NM_014807,NM_001205293,NM_207578,NM_004041,NM_004123,NM_003012,NM_174889,NM_014980,NM_001178065,NM_007375,NM_003081,NM_004157,NM_001005291,NM_021928,NM_021995,NM_021969,NM_006168,NM_006105,NM_001039966,NM_173560,NM_024959,NM_007023,NM_001030273,NM_001256627,NM_012283,NM_020665,NM_012240,NM_207042,NM_012215,NM_207168,NM_006516,NM_000944,NM_00092…	true	-0.13444	0.00039912
cytoplasmic pattern recognition receptor signaling pathway in response to virus(GO:0039528)	20	46	NM_004031,NM_020746,NM_017631,NM_020119,NM_201402,NM_014314,NM_024119,NM_022168,NM_001571,NM_015578,NM_024625,NM_033229,NM_001282144,NM_001256872,NM_001256873,NM_001256869,NM_003270,NM_001212,NM_001165,NM_001166	true	0.213025	0.000404993
nucleotide-excision repair, DNA gap filling(GO:0006297)	20	48	NM_006591,NM_000234,NM_006231,NM_006230,NM_001008537,NM_016218,NM_021173,NM_002913,NM_002915,NM_002916,NM_002947,NM_002946,NM_002945,NM_002691,NM_002692,NM_181471,NM_181578,NM_181558,NM_002592,NM_002312	true	0.212991	0.000406816
regulation of lipid kinase activity(GO:0043550)	36	100	NM_004235,NM_052880,NM_004356,NM_004119,NM_006113,NM_020526,NM_005027,NM_018890,NM_000142,NM_000222,NM_005235,NM_006206,NM_000321,NM_006243,NM_006274,NM_000459,NM_000660,NM_005611,NM_005544,NM_032552,NM_002989,NM_176875,NM_002895,NM_183404,NM_001093772,NM_022162,NM_138709,NM_001838,NM_001042747,NM_173174,NM_001006943,NM_181523,NM_002608,NM_002609,NM_002350,NM_153831	true	-0.263549	0.000410189
positive regulation of receptor activity(GO:2000273)	26	58	NM_004210,NM_007262,NM_013372,NM_005045,NM_006540,NM_133263,NM_018977,NM_181659,NM_000297,NM_001035235,NM_005481,NM_001270989,NM_005400,NM_000681,NM_000683,NM_001432,NM_001963,NM_177977,NM_001191323,NM_002111,NM_004935,NM_003236,NM_004774,NM_033632,NM_003183,NM_032408	true	-0.29995	0.000410202
regulation of neutrophil migration(GO:1902622)	25	36	NM_004054,NM_004139,NM_001271749,NM_018890,NM_006274,NM_148910,NM_005337,NM_000584,NM_002995,NM_002989,NM_002872,NM_016584,NM_022162,NM_001025158,NM_001557,NM_001957,NM_001955,NM_001166461,NM_001838,NM_001039661,NM_003248,NM_004787,NM_002436,NM_001212,ENST00000378845	true	0.203304	0.000424183
regulation of neutrophil chemotaxis(GO:0090022)	25	36	NM_004054,NM_004139,NM_001271749,NM_018890,NM_006274,NM_148910,NM_005337,NM_000584,NM_002995,NM_002989,NM_002872,NM_016584,NM_022162,NM_001025158,NM_001557,NM_001957,NM_001955,NM_001166461,NM_001838,NM_001039661,NM_003248,NM_004787,NM_002436,NM_001212,ENST00000378845	true	0.203304	0.000424183
positive regulation of striated muscle cell differentiation(GO:0051155)	25	53	NM_004274,NM_014757,NM_019885,NM_013372,NM_004093,NM_003030,NM_000193,NM_018670,NM_198274,NM_000633,NM_000684,NM_199289,NM_080647,NM_080646,NM_001191323,NM_033131,NM_001145460,NM_004958,NM_001146312,NM_003250,NM_153604,NM_002479,NM_002397,NM_001202,NM_001234	true	-0.303675	0.000430355
positive regulation of receptor internalization(GO:0002092)	18	48	NM_004313,NM_001257389,NM_013372,NM_004041,NM_003014,NM_174936,NM_012407,NM_012301,NM_017651,NM_000450,NM_000795,NM_018373,NM_032810,NM_001191323,NM_017988,NM_033131,NM_002527,NM_001146	true	-0.343366	0.000431772
renal interstitial fibroblast development(GO:0072141)	6	8	NM_005251,NM_017617,NM_005524,NM_001613,NM_145260,NM_002608	true	-0.49508	0.000443793
'de novo' NAD biosynthetic process(GO:0034627)	5	9	NM_001010982,NM_012205,NM_001145526,NM_003679,NM_001032998	true	0.266228	0.000445039
'de novo' NAD biosynthetic process from tryptophan(GO:0034354)	5	9	NM_001010982,NM_012205,NM_001145526,NM_003679,NM_001032998	true	0.266228	0.000445039
regulation of centriole replication(GO:0046599)	10	23	NM_007300,NM_144718,NM_001005207,NM_001037738,NM_018451,NM_014264,NM_018249,NM_006622,NM_015294,NM_002520	true	0.239872	0.000449288
glomerular mesangium development(GO:0072109)	10	19	NM_005251,NM_017617,NM_001613,NM_001025109,NM_001964,NM_024426,NM_001773,NM_002608,NM_002609,NM_001202	true	-0.419971	0.000452425
response to endoplasmic reticulum stress(GO:0034976)	153	372	NM_004208,NM_014685,NM_014674,NM_004287,NM_004324,NM_004343,NM_007126,NM_014760,NM_014780,NM_057161,NM_019884,NM_013388,NM_004094,ENST00000262455,NM_004082,NM_004083,NM_007348,NM_013438,NM_003029,NM_007375,NM_001244710,NM_006164,NM_006005,ENST00000283033,NM_173201,NM_001256627,NM_207002,NM_012328,NM_172230,NM_005080,NM_005065,NM_000018,NM_020470,NM_000918,NM_018981,NM_198440,NM_000209,NM_006368,N…	true	-0.137621	0.000455145
nuclear pore organization(GO:0006999)	12	22	NM_018087,NM_001278209,NM_020401,ENST00000261396,NM_005387,NM_016320,NM_018230,NM_015135,NM_015446,NM_001013437,NM_031216,NM_003292	true	0.232653	0.00045658
nephric duct morphogenesis(GO:0072178)	7	20	NM_001164617,NM_017651,NM_001002295,NM_003990,NM_145260,NM_001202,NM_003396	true	-0.470234	0.000472815
receptor catabolic process(GO:0032801)	15	39	NM_014710,NM_174936,NM_001206998,NM_020429,NM_198400,NM_001008530,NM_201278,NM_013262,NM_000660,NM_001199866,NM_031953,NM_017763,NM_024704,NM_004935,NM_002569	true	-0.364232	0.00048523
ER-nucleus signaling pathway(GO:0006984)	98	231	NM_014685,NM_014674,NM_004287,NM_004324,NM_004343,NM_007126,NM_014760,NM_014780,NM_057161,NM_019884,NM_013388,NM_004094,NM_004082,NM_004083,NM_007348,NM_003029,NM_001244710,NM_006164,NM_006005,NM_012235,NM_012328,NM_172230,NM_005080,NM_000018,NM_020470,NM_198440,NM_006368,NM_020198,NM_170707,NM_000391,NM_006244,NM_006289,NM_014189,NM_000546,NM_001257145,NM_018445,NM_005347,NM_000596,NM_000584,NM_…	true	-0.168474	0.000488917
mesangial cell development(GO:0072143)	5	7	NM_005251,NM_017617,NM_001613,NM_145260,NM_002608	true	-0.521442	0.000489644
retina vasculature development in camera-type eye(GO:0061298)	16	26	NM_173728,NM_012193,NM_020663,NM_013943,NM_000020,NM_001024629,NM_000266,NM_006206,NM_000327,NM_001845,NM_003615,NM_003873,NM_002609,NM_001204,NM_002335,NM_001106	true	-0.355075	0.000507666
bone morphogenesis(GO:0060349)	82	137	NM_001271938,NM_007112,NM_144966,NM_019885,NM_014918,NM_003030,NM_003013,NM_003036,NM_020800,NM_001032280,NM_012201,NM_001024847,NM_000088,NM_000095,NM_000965,NM_000966,NM_000941,NM_001024630,NM_000142,NM_020318,NM_000168,NM_000288,NM_005221,NM_017637,NM_000346,NM_198184,NM_001009994,NM_016277,NM_000478,NM_000474,NM_000459,NM_005454,NM_001257096,NM_022970,NM_000660,NM_005328,NM_199141,NM_016133,N…	true	-0.182239	0.000507706
regulation of vesicle-mediated transport(GO:0060627)	276	629	NM_004218,NM_173847,NM_007218,NM_014601,NM_007261,NM_007269,NM_001030007,NM_004251,NM_052893,NM_004283,NM_004333,NM_004327,NM_004343,NM_004313,NM_007155,NM_014747,NM_014748,NM_007121,NM_007166,NM_014802,NM_014832,NM_004383,NM_001257389,NM_013346,NM_013372,NM_014932,NM_014911,NM_004041,NM_144707,NM_004106,NM_007308,NM_007314,NM_007313,NM_003019,NM_003014,NM_003026,NM_014980,NM_001256185,NM_014999,…	true	-0.10292	0.000509691
meiotic cell cycle(GO:0051321)	174	400	NM_004237,NM_018087,NM_018068,NM_014647,NM_012447,NM_012444,NM_004343,NM_004337,NM_018136,NM_144998,NM_057161,NM_001205262,NM_019885,NM_020937,NM_144688,NM_175932,XM_005273551,NM_021979,NM_021951,NM_006185,NM_207459,NM_001005386,NM_007068,NM_001038633,NM_012291,NM_012237,NM_012415,NM_001136505,NM_001136566,NM_207189,NM_001083965,NM_001017975,NM_020530,NM_000051,NM_198393,NM_000921,NM_000135,NM_00…	true	0.113388	0.000518451
muscle system process(GO:0003012)	318	771	NM_004235,NM_014663,NM_001256022,NM_001037341,NM_001278344,NM_052862,NM_004272,NM_004274,NM_004318,ENST00000383718,NM_007124,NM_001099404,NM_001011717,NM_001034954,ENST00000334082,NM_001243756,NM_013353,NM_019884,NM_019859,NM_014937,NM_004087,NM_013451,NM_003063,NM_020988,NM_003047,NM_001267550,NM_021995,NM_006172,NM_021935,NM_174934,NM_020856,NM_001039966,NM_134269,NM_079420,NM_172082,NM_006056,…	true	-0.095925	0.000522246
pore complex assembly(GO:0046931)	10	27	NM_018087,NM_004322,NM_001278209,NM_006585,NM_020401,NM_005387,NM_016320,NM_015135,NM_005998,NM_015446	true	0.238681	0.000522608
membrane raft organization(GO:0031579)	15	41	NM_007229,NM_004087,NM_000271,NM_000310,NM_001020818,NM_002966,NM_015150,NM_001753,NM_001767,NM_001002857,NM_001184970,NM_004946,NM_002371,NM_001234,NM_001233	true	-0.362555	0.000527629
Wnt signaling pathway(GO:0016055)	323	835	NM_173849,NM_014633,NM_014604,NM_014709,NM_012476,NM_004252,NM_004360,NM_004326,NM_007191,NM_018136,NM_007197,NM_014795,NM_057168,NM_019884,NM_013372,NM_001206885,NM_004083,NM_007314,NM_007313,NM_003015,NM_003014,NM_020920,NM_003012,NM_003013,ENST00000415567,NM_003068,NM_003036,NM_004162,NM_004143,NM_004185,NM_001004105,NM_020800,NM_001005209,NM_012090,NM_012083,NM_020898,NM_001080414,NM_006098,N…	true	-0.0950691	0.000531918
stress fiber assembly(GO:0043149)	75	150	NM_014629,NM_014634,NM_007286,NM_004333,NM_001034954,NM_014906,NM_004041,NM_173728,NM_013427,NM_003012,NM_006105,NM_006125,NM_001278939,NM_001135190,ENST00000379350,NM_001113490,NM_000039,NM_005022,NM_018890,NM_133265,NM_000958,NM_000934,ENST00000395358,ENST00000394243,NM_000261,NM_005232,NM_000366,NM_000368,NM_017640,NM_022334,NM_181832,NM_181831,NM_005406,NM_030761,NM_013241,NM_016337,ENST00000…	true	-0.188829	0.000542468
ribonucleoprotein complex subunit organization(GO:0071826)	150	445	NM_007204,NM_012423,NM_014706,NM_001243646,NM_014753,NM_018128,NM_018130,NM_007165,NM_007178,NM_001037283,NM_004397,NM_175854,NM_013354,NM_007362,NM_003096,NM_003094,NM_003095,NM_003093,NM_004175,NM_001037738,NM_134323,NM_006110,NM_173533,NM_001005369,ENST00000401695,NM_012118,NM_001037808,NM_012345,NM_005089,NM_006590,NM_148416,NM_006445,NM_006425,NM_017492,NM_006360,NM_014060,NM_014014,NM_01902…	true	0.11966	0.000544262
BMP signaling pathway involved in heart development(GO:0061312)	5	20	NM_002701,NM_002448,NM_002449,NM_001200,NM_001202	true	-0.518638	0.00054713
regulation of neurogenesis(GO:0050767)	453	1009	NM_004210,NM_007207,NM_001204424,NM_173808,NM_018084,NM_014618,NM_007283,NM_007284,NM_014683,NM_018008,NM_018014,NM_001271938,NM_012437,NM_012428,NM_014717,NM_012479,NM_004263,BC021560,NM_004360,NM_004329,NM_004343,NM_004309,NM_004316,NM_007148,NM_018136,NM_014780,ENST00000392133,CR749417,NM_057159,NM_018098,NM_014809,NM_001278198,NM_001080395,NM_013366,NM_014868,NM_014845,NM_014943,NM_014932,NM_…	true	-0.0804185	0.000552766
negative regulation of phosphorus metabolic process(GO:0010563)	350	924	NM_078467,NM_019619,NM_004235,NM_007207,NM_007236,NM_001256053,NM_014634,NM_007262,NM_007261,NM_007271,NM_012479,NM_004252,NM_004274,NM_004346,NM_004324,NM_004323,NM_004310,NM_144949,NM_001204375,NM_007199,NM_144997,NM_007178,NM_004393,NM_004383,NM_173647,NM_173657,NM_019884,NM_001278160,NM_013372,NM_078626,NM_004090,NM_014915,NM_014906,NM_019839,NM_004064,NM_007313,NM_004124,NM_003015,NM_003014,…	true	-0.091133	0.000555495
negative regulation of phosphate metabolic process(GO:0045936)	350	924	NM_078467,NM_019619,NM_004235,NM_007207,NM_007236,NM_001256053,NM_014634,NM_007262,NM_007261,NM_007271,NM_012479,NM_004252,NM_004274,NM_004346,NM_004324,NM_004323,NM_004310,NM_144949,NM_001204375,NM_007199,NM_144997,NM_007178,NM_004393,NM_004383,NM_173647,NM_173657,NM_019884,NM_001278160,NM_013372,NM_078626,NM_004090,NM_014915,NM_014906,NM_019839,NM_004064,NM_007313,NM_004124,NM_003015,NM_003014,…	true	-0.091133	0.000555495
negative regulation of cell-substrate adhesion(GO:0010812)	45	112	NM_012431,NM_013427,NM_006125,NM_012193,NM_207191,NM_207197,NM_001010887,NM_000020,NM_000077,NM_000088,NM_000261,NM_000314,NM_000301,NM_017617,NM_018715,NM_022334,NM_181832,NM_181831,NM_017679,NM_005430,NM_000602,NM_006896,NM_018569,ENST00000360635,NM_153186,NM_002890,NM_005993,NM_005929,NM_001198815,NM_001647,NM_030667,NM_001978,NM_001042492,NM_003688,NM_001256877,NM_003507,NM_033316,NM_004995,N…	true	-0.235585	0.000556301
antigen processing and presentation of exogenous peptide antigen via MHC class I, TAP-dependent(GO:0002479)	71	263	NM_014614,NM_004343,NM_018144,NM_014814,NM_013336,NM_004048,NM_004159,NM_175932,NM_001242758,NM_172208,NM_005047,NM_018833,NM_006503,NM_000101,NM_018950,NM_018955,NM_000265,NM_000397,NM_006263,NM_000433,NM_148976,NM_001098478,NM_021009,NM_000593,NM_000631,NM_014302,NM_006814,NM_006808,NM_005313,NM_005514,NM_176863,NM_002954,NM_005805,NM_002808,NM_002809,NM_002806,NM_002807,NM_002804,NM_002805,NM_…	true	-0.1929	0.000567702
recombinational repair(GO:0000725)	75	190	NM_001100119,NM_014641,NM_175871,NM_001205262,NM_001080394,NM_001114121,NM_014855,NM_173685,NM_013432,NM_007300,NM_014967,NM_144688,NM_020839,NM_012415,NM_001136566,NM_000051,NM_000057,NM_000059,NM_006479,NM_018975,NM_198468,NM_006304,NM_017553,NM_133509,NM_133510,NM_000234,NM_005236,NM_134424,NM_181808,NM_017696,NM_005431,NM_133636,NM_133629,NM_001257097,NM_001142571,NM_206839,NM_005657,NM_00559…	true	0.151377	0.000576234
subthalamus development(GO:0021539)	47	135	NM_004209,NM_004347,NM_014866,NM_007365,NM_001037494,NM_044472,NM_021964,NM_001039802,NM_012237,NM_022491,NM_006317,NM_005271,NM_005184,NM_006271,NM_021629,NM_001003703,NM_000402,NM_005347,NM_006888,NM_006826,NM_014402,NM_006761,NM_000898,NM_005566,NM_022757,NM_032538,NM_025189,NM_032727,NM_001743,NM_002853,NM_001688,NM_001664,NM_001025100,NM_001025101,NM_001006617,NM_001006618,NM_001976,NM_00186…	true	-0.230698	0.000577443
heart valve development(GO:0003170)	23	51	NM_003030,NM_012259,NM_000192,NM_017617,NM_001002295,NM_000346,NM_000474,NM_005359,NM_001142620,NM_014571,NM_001166220,NM_001554,NM_024408,NM_002052,NM_001199042,NM_001040708,NM_003107,NM_002397,NM_001200,NM_153813,NM_002230,NM_001105,NM_004428	true	-0.307548	0.000595212
COPI coating of Golgi vesicle(GO:0048205)	12	28	NM_004193,NM_199444,NM_017510,NM_001024227,NM_006827,NM_006815,NM_016057,NM_016128,NM_001098398,NM_001655,NM_016451,NM_004766	true	-0.388828	0.000608848
Golgi transport vesicle coating(GO:0048200)	12	28	NM_004193,NM_199444,NM_017510,NM_001024227,NM_006827,NM_006815,NM_016057,NM_016128,NM_001098398,NM_001655,NM_016451,NM_004766	true	-0.388828	0.000608848
COPI-coated vesicle budding(GO:0035964)	12	28	NM_004193,NM_199444,NM_017510,NM_001024227,NM_006827,NM_006815,NM_016057,NM_016128,NM_001098398,NM_001655,NM_016451,NM_004766	true	-0.388828	0.000608848
skeletal muscle cell proliferation(GO:0014856)	10	21	NM_175875,NM_000193,NM_001127184,NM_005982,NM_001202519,NM_003879,NM_003258,NM_002479,NM_001146,NM_032446	true	0.237424	0.000611771
synaptic vesicle localization(GO:0097479)	77	189	NM_001030005,NM_012437,NM_052893,NM_004333,NM_014747,NM_007166,NM_014932,NM_001242369,NM_007308,NM_003026,NM_020946,NM_014989,NM_003081,NM_004162,NM_001271667,ENST00000215095,NM_001080421,NM_001005360,NM_001001132,NM_207012,NM_012388,NM_012398,NM_000021,NM_000113,NM_006377,NM_000314,NM_001009939,NM_006950,NM_014232,NM_201280,NM_022970,NM_006803,NM_001098210,NM_005639,NM_199292,NM_014510,NM_006651…	true	-0.184996	0.000612884
mammary gland morphogenesis(GO:0060443)	49	87	NM_004324,NM_003014,NM_001122742,NM_001010848,NM_001024847,NM_000044,NM_000926,NM_000168,NM_001079675,NM_005211,NM_030761,NM_000599,NM_022970,NM_000660,NM_000757,NM_001098169,NM_002986,NM_001497,NM_001463,NM_016569,NM_005994,NM_001753,NM_015464,NM_001657,NM_001144831,NM_182706,ENST00000359354,NM_001244438,NM_033244,NM_033247,NM_033238,NM_181458,NM_004822,NM_001046,NM_003222,NM_004774,NM_033637,NM…	true	-0.225579	0.000618151
blood vessel endothelial cell migration(GO:0043534)	58	156	NM_004235,NM_014707,NM_013372,NM_004093,NM_014909,NM_001113490,NM_000039,NM_000020,NM_000963,NM_133265,NM_199418,NM_001024629,NM_000267,NM_006384,NM_005251,NM_017617,NM_005163,NM_022334,NM_000412,NM_133376,NM_130847,NM_018419,NM_019074,NM_133631,NM_014319,NM_000660,ENST00000360635,NM_000686,NM_005505,NM_001503,NM_001320,NM_015401,NM_002757,NM_002742,NM_016457,NM_002737,NM_001540,NM_024756,NM_0011…	true	-0.209472	0.000627181
plasma membrane to endosome transport(GO:0048227)	7	15	NM_014688,NM_201434,NM_006861,NM_002959,NM_002868,NM_015705,NM_004663	true	-0.463286	0.000636443
synaptic vesicle transport(GO:0048489)	76	186	NM_001030005,NM_012437,NM_052893,NM_004333,NM_014747,NM_007166,NM_014932,NM_001242369,NM_007308,NM_003026,NM_020946,NM_014989,NM_003081,NM_004162,NM_001271667,ENST00000215095,NM_001080421,NM_001005360,NM_001001132,NM_207012,NM_012388,NM_012398,NM_000021,NM_000113,NM_006377,NM_001009939,NM_006950,NM_014232,NM_201280,NM_022970,NM_006803,NM_001098210,NM_005639,NM_199292,NM_014510,NM_006651,NM_006650…	true	-0.185555	0.000637771
establishment of synaptic vesicle localization(GO:0097480)	76	186	NM_001030005,NM_012437,NM_052893,NM_004333,NM_014747,NM_007166,NM_014932,NM_001242369,NM_007308,NM_003026,NM_020946,NM_014989,NM_003081,NM_004162,NM_001271667,ENST00000215095,NM_001080421,NM_001005360,NM_001001132,NM_207012,NM_012388,NM_012398,NM_000021,NM_000113,NM_006377,NM_001009939,NM_006950,NM_014232,NM_201280,NM_022970,NM_006803,NM_001098210,NM_005639,NM_199292,NM_014510,NM_006651,NM_006650…	true	-0.185555	0.000637771
positive regulation of heart rate(GO:0010460)	17	31	NM_021995,NM_012259,NM_207032,NM_000022,NM_000366,NM_018400,NM_000679,NM_000684,NM_000706,NM_001018004,NM_001018005,NM_001681,NM_001956,NM_001955,NM_002152,NM_001059,NM_001035	true	-0.342739	0.00064254
epithelial cell differentiation involved in kidney development(GO:0035850)	33	80	NM_014625,NM_014751,NM_012301,NM_005044,NM_006317,NM_005251,NM_014079,NM_017617,NM_001002295,NM_000619,NM_001098210,NM_001454,NM_001282971,NM_001613,NM_001025109,NM_030667,NM_001904,NM_024426,NM_003990,NM_001773,NM_001145850,NM_139266,NM_003870,NM_004998,NM_145260,NM_002608,NM_004797,NM_004646,NM_002397,NM_001202,NM_002309,NM_003466,NM_002292	true	-0.265391	0.000643384
ribosomal small subunit assembly(GO:0000028)	6	15	ENST00000401695,NM_005617,NM_005702,NM_001025071,NM_001010,NM_001022	true	0.256289	0.000653024
programmed necrotic cell death(GO:0097300)	33	75	NM_004324,NM_001278464,NM_012062,NM_001278548,NM_012237,NM_000043,NM_001127184,NM_017672,NM_000546,NM_000594,NM_006871,NM_000639,NM_021138,NM_005729,NM_015247,NM_002863,NM_005923,NM_001202519,NM_001162383,NM_138575,NM_001126118,NM_031229,NM_003651,NM_003879,NM_003824,NM_003804,NM_003265,NM_004723,NM_152649,NM_032306,NM_001165,NM_001166,NM_001151	true	0.187853	0.000654314
positive regulation of nitric oxide biosynthetic process(GO:0045429)	33	107	NM_004235,NM_007355,NM_012137,NM_001122742,NM_001017963,NM_013974,NM_000029,NM_000050,NM_000963,NM_000125,NM_000208,NM_000207,NM_000201,NM_005228,NM_000297,NM_005163,NM_001008504,NM_000518,NM_005348,NM_201282,NM_201283,NM_000576,NM_000594,NM_000619,NM_000686,NM_031900,NM_002852,NM_001955,NM_182919,NM_138554,NM_001256796,NM_004972,NM_003264	true	0.18775	0.000662681
regulation of chromosome segregation(GO:0051983)	35	80	NM_004217,NM_004336,NM_018098,NM_173685,NM_044472,NM_001032293,NM_001039802,NM_012291,NM_012237,NM_000038,NM_006461,NM_000321,NM_018715,NM_018486,NM_013277,NM_006845,NM_001098507,NM_001098210,NM_015045,NM_001142761,NM_080668,NM_032559,NM_015110,NM_031966,NM_022092,NM_001904,NM_001166422,NM_001166419,NM_003550,NM_003292,NM_032132,NM_004725,NM_002497,NM_004655,NM_001254	true	0.185038	0.000672197
establishment of epithelial cell polarity(GO:0090162)	10	23	NM_004227,NM_019619,NM_018027,NM_001080542,NM_001039876,NM_015123,NM_001663,NM_001184792,NM_004762,NM_004609	true	-0.411084	0.000680012
negative regulation of defense response to virus(GO:0050687)	14	39	NM_134323,NM_001033557,NM_006355,NM_000417,NM_002775,NM_002759,NM_002706,NM_001548,NM_015650,NM_031483,NM_177968,NM_024544,NM_001135652,NM_001212	true	0.223353	0.000683614
neural crest cell differentiation(GO:0014033)	51	103	NM_173849,NM_004329,NM_014795,NM_003012,NM_020975,NM_003068,NM_004186,NM_021973,NM_006080,NM_172037,NM_001024629,NM_000193,NM_006379,NM_005251,NM_005235,NM_000346,NM_005117,NM_001190468,NM_016269,NM_058244,NM_000474,NM_000514,NM_006941,NM_201266,NM_005359,NM_005631,NM_000899,NM_000867,NM_005560,NM_014587,NM_005524,NM_080647,NM_080646,NM_001463,NM_001453,NM_025216,NM_153426,NM_001957,NM_001955,NM_…	true	-0.220002	0.000691874
inositol phosphate dephosphorylation(GO:0046855)	7	17	NM_019892,NM_000314,NM_014214,NM_005536,NM_001144879,NM_175732,NM_004686	true	0.250008	0.000692884
cellular response to molecule of bacterial origin(GO:0071219)	103	255	NM_014633,NM_001037341,NM_004271,NM_004345,NM_007313,NM_004120,NM_001174104,NM_001037499,NM_004139,NM_207315,NM_021913,NM_021975,NM_021805,NM_006068,NM_001278548,NM_001278547,NM_020661,NM_012237,NM_020529,NM_005007,NM_000952,NM_000102,NM_020353,NM_018965,NM_000201,NM_005263,NM_021724,NM_000349,NM_001164722,NM_006290,NM_147156,NM_001079821,NM_148910,NM_005400,NM_018445,NM_000572,NM_000574,NM_00057…	true	0.134831	0.00071427
glycoprotein metabolic process(GO:0009100)	368	954	NM_007210,NM_007236,NM_007255,NM_014674,NM_014654,NM_012461,NM_052859,NM_052872,NM_001034845,NM_004273,NM_004343,NM_004314,NM_144988,NM_007126,NM_007171,NM_001243766,NM_004386,NM_004385,NM_173601,NM_175856,NM_001080393,NM_013338,NM_013339,NM_013335,NM_013352,NM_173654,NM_019886,NM_013382,NM_013388,NM_001101426,NM_014918,NM_014908,ENST00000262455,NM_007357,NM_013443,NM_003033,NM_003034,NM_144677,N…	true	-0.0871707	0.000717085
positive regulation of cellular extravasation(GO:0002693)	7	10	ENST00000252590,NM_000201,NM_002982,NM_001123041,NM_003824,NM_001123396,NM_001109	true	0.249722	0.00071756
morphogenesis of an epithelium(GO:0002009)	369	713	NM_019619,NM_014632,NM_018055,NM_018012,NM_018010,NM_001271938,NM_012431,NM_004360,NM_004324,NM_014751,NM_007129,NM_018190,NM_014795,NM_057168,NM_004390,NM_001243756,NM_001033047,NM_004087,NM_003015,NM_003012,NM_003013,NM_001178065,NM_020909,NM_020975,NM_003036,NM_004158,NM_001257206,NM_004143,NM_013993,NM_021973,NM_006167,NM_020859,NM_001005366,NM_001005333,NM_001032280,NM_006080,NM_006015,NM_00…	true	-0.087034	0.000719309
ureteric bud elongation(GO:0060677)	7	20	NM_018012,NM_001257206,NM_017420,NM_000800,NM_002968,NM_005982,NM_001202	true	-0.459515	0.000744861
positive regulation vascular endothelial growth factor production(GO:0010575)	24	55	NM_018055,NM_004054,NM_007300,NM_134260,NM_007052,NM_013955,NM_000064,NM_018837,NM_000963,NM_133459,NM_000575,NM_000576,NM_000660,NM_000676,NM_001190981,NM_006665,NM_015170,NM_001735,NM_001668,NM_002184,NM_002020,NM_002052,NM_181054,NM_002202	true	0.200521	0.000746504
regulation of glomerulus development(GO:0090192)	10	21	NM_020975,NM_020630,NM_005450,NM_000686,NM_001964,NM_024426,NM_003990,NM_002608,NM_004797,NM_001202	true	-0.408967	0.000747248
interleukin-6-mediated signaling pathway(GO:0070102)	11	28	NM_014633,NM_207123,NM_005263,NM_005246,NM_000565,NM_000600,NM_001190981,NM_002828,NM_080423,NM_002184,NM_213662	true	0.231993	0.000757945
antigen processing and presentation of peptide antigen(GO:0048002)	191	682	NM_007234,NM_014614,NM_001030007,NM_018009,NM_004343,NM_018144,NM_007096,NM_014814,NM_013336,NM_001256270,NM_004068,NM_004048,NM_004082,NM_004079,NM_007317,NM_004106,NM_001242524,NM_003026,NM_014970,NM_001037494,NM_004159,NM_175932,NM_021982,NM_021983,NM_006120,NM_006141,NM_001080463,NM_001242758,NM_001005360,NM_001242837,NM_001033503,NM_001163942,NM_001243952,NM_001243962,NM_001163993,NM_172208,…	true	-0.119078	0.000764113
antigen processing and presentation(GO:0019882)	234	1127	NM_007234,NM_014614,NM_001030007,NM_018009,NM_004343,NM_018144,NM_007096,NM_014814,NM_004390,NM_013336,NM_001256270,NM_004068,NM_004048,NM_004082,NM_004079,NM_007317,NM_004107,NM_004106,NM_001242524,NM_003026,NM_014970,NM_001037494,NM_004159,NM_175932,NM_021982,NM_021983,NM_006120,NM_006141,NM_001080463,NM_001242758,NM_001005360,NM_006092,NM_001242837,NM_001033503,NM_001163942,NM_001243952,NM_001…	true	-0.107938	0.000769645
endocrine system development(GO:0035270)	125	241	NM_004360,NM_004329,NM_004322,NM_004316,NM_001267843,NM_019884,NM_004123,NM_020999,NM_004133,NM_006193,NM_006168,NM_001080488,NM_006079,NM_173560,NM_001030273,NM_000039,NM_000076,NM_000922,NM_000102,NM_000162,NM_000164,NM_000193,ENST00000379123,NM_000267,NM_021784,NM_000280,NM_000209,NM_000207,NM_005270,NM_005269,NM_005257,NM_014080,NM_000298,NM_005207,NM_006206,NM_001002295,NM_000340,NM_000346,N…	true	-0.145383	0.000778438
MyD88-independent toll-like receptor signaling pathway(GO:0002756)	76	231	NM_180976,NM_001114123,NM_004090,NM_004031,NM_001174104,NM_003010,NM_021975,NM_006116,NM_006092,NM_001278548,NM_001278547,NM_001135044,NM_020529,NM_181886,NM_018955,NM_005252,NM_005229,NM_001288724,NM_005171,NM_138980,NM_138957,NM_134442,NM_005400,NM_001257168,NM_021009,NM_006871,NM_013254,NM_015093,NM_021135,NM_001281435,NM_002953,NM_002954,NM_001394,NM_153497,NM_002758,NM_002755,NM_002752,NM_00…	true	0.148301	0.000780846
heart contraction(GO:0060047)	159	361	NM_001256022,NM_001037341,NM_001243812,NM_004318,NM_001099404,NM_019888,NM_019884,ENST00000256969,NM_020971,NM_003047,NM_001005291,NM_021995,NM_174934,NM_079420,NM_006080,NM_006037,NM_001204218,NM_012282,NM_012283,NM_020683,NM_012259,NM_207032,NM_172201,ENST00000278947,ENST00000380573,NM_000022,NM_018896,NM_006541,NM_006514,NM_199460,NM_000152,NM_000165,NM_000256,NM_000258,NM_000257,NM_000238,NM_…	true	-0.129585	0.00079277
mitotic sister chromatid segregation(GO:0000070)	66	143	NM_018101,NM_014750,NM_001100399,NM_014865,NM_173685,NM_001257281,ENST00000394884,NM_001100400,NM_006101,NM_001032293,NM_001206999,NM_012291,NM_198393,NM_006461,NM_006306,NM_017553,NM_022346,NM_133433,NM_000321,NM_133379,NM_133378,NM_005496,NM_006999,NM_005445,NM_016359,NM_001098507,NM_015032,NM_001142761,NM_001265577,NM_080668,NM_024094,NM_015261,NM_032636,NM_005858,NM_005886,NM_015110,NM_015100…	true	0.15468	0.000800307
response to fibroblast growth factor(GO:0071774)	214	547	NM_078467,NM_004214,NM_014679,NM_012428,NM_004333,NM_004322,NM_019884,NM_001278160,NM_207578,NM_019851,NM_004036,NM_004064,NM_004113,NM_003029,NM_003012,NM_001178065,NM_007373,NM_001174066,NM_020963,NM_020996,NM_004157,NM_001257206,NM_006139,NM_012154,NM_012199,NM_020638,NM_020637,NM_013982,NM_207123,NM_020546,NM_000088,NM_005027,NM_018837,NM_005026,NM_005020,NM_001024630,NM_000924,NM_000142,NM_0…	true	-0.112325	0.000801504
positive regulation of heart contraction(GO:0045823)	20	39	NM_019884,NM_021995,NM_012259,NM_207032,NM_000022,NM_000366,NM_018400,NM_000679,NM_000684,NM_000706,NM_001018004,NM_001018005,NM_001681,NM_001166175,NM_001956,NM_001955,NM_002152,NM_001059,NM_001035,NM_003238	true	-0.318206	0.000809758
double-strand break repair via homologous recombination(GO:0000724)	74	187	NM_001100119,NM_014641,NM_175871,NM_001205262,NM_001080394,NM_001114121,NM_014855,NM_173685,NM_013432,NM_007300,NM_014967,NM_144688,NM_020839,NM_012415,NM_001136566,NM_000051,NM_000057,NM_000059,NM_006479,NM_018975,NM_198468,NM_006304,NM_017553,NM_133509,NM_133510,NM_000234,NM_005236,NM_134424,NM_181808,NM_017696,NM_005431,NM_133636,NM_133629,NM_001142571,NM_206839,NM_005657,NM_005590,NM_018347,N…	true	0.149204	0.00081392
cellular response to topologically incorrect protein(GO:0035967)	95	231	NM_014685,NM_014674,NM_004287,NM_004324,NM_004343,NM_007126,NM_014760,NM_014780,NM_057161,NM_019884,NM_013388,NM_004094,NM_004082,NM_004083,NM_007348,NM_003029,NM_001244710,NM_006164,NM_006044,NM_006005,NM_012328,NM_172230,NM_005080,NM_000018,NM_020470,NM_000113,NM_198440,NM_006368,NM_170707,NM_000391,NM_006244,NM_006289,NM_014189,NM_006913,NM_001257145,NM_018445,NM_005347,NM_000596,NM_000584,NM_…	true	-0.164481	0.000821156
telomere maintenance via telomere lengthening(GO:0010833)	40	96	NM_012461,NM_004111,NM_001080449,NM_024928,NM_006591,NM_000946,NM_018975,NM_017489,NM_000234,NM_006231,NM_006230,NM_198253,NM_005652,NM_005590,NM_021173,NM_005732,NM_025235,NM_002913,NM_002915,NM_002916,NM_002947,NM_002946,NM_002945,NM_001363,NM_025099,NM_015450,NM_025049,NM_002691,NM_002692,NM_017884,NM_033244,NM_033247,NM_033238,NM_181471,NM_181578,NM_181558,NM_003747,NM_002592,NM_152677,NM_033…	true	0.177379	0.000826033
antigen processing and presentation of exogenous antigen(GO:0019884)	171	580	NM_007234,NM_014614,NM_001030007,NM_004343,NM_018144,NM_007096,NM_014814,NM_013336,NM_001256270,NM_004068,NM_004048,NM_004082,NM_004079,NM_007317,NM_004106,NM_001242524,NM_003026,NM_014970,NM_001037494,NM_004159,NM_175932,NM_021982,NM_021983,NM_006120,NM_006141,NM_001080463,NM_001242758,NM_001005360,NM_001242837,NM_001033503,NM_001163942,NM_001243952,NM_001243962,NM_001163993,NM_172208,NM_012305,…	true	-0.124731	0.000828899
kinetochore organization(GO:0051383)	11	47	NM_144998,NM_022909,NM_016343,NM_024039,NM_002938,NM_015100,NM_001012507,NM_001809,NM_015571,NM_001813,NM_001812	true	0.231143	0.000840432
kinetochore assembly(GO:0051382)	11	45	NM_144998,NM_022909,NM_016343,NM_024039,NM_002938,NM_015100,NM_001012507,NM_001809,NM_015571,NM_001813,NM_001812	true	0.231143	0.000840432
histone demethylation(GO:0016577)	33	76	NM_014663,NM_018039,NM_007125,ENST00000377803,NM_004187,NM_021968,NM_001080424,NM_001005366,ENST00000381306,NM_012308,AB031230,NM_001034077,NM_018433,NM_005392,NM_015061,NM_015013,NM_006618,ENST00000382893,NM_032590,NM_015107,NM_015167,NM_030647,NM_001184898,NM_182660,NM_003540,NM_003543,NM_003542,NM_003547,NM_175054,NM_004653,NM_001145348,NM_003337,NM_001146702	true	0.185646	0.000854521
tube morphogenesis(GO:0035239)	298	576	NM_014632,NM_018055,NM_018012,NM_018010,NM_001271938,NM_012431,NM_004360,NM_004324,NM_014751,NM_007129,NM_018190,NM_014795,NM_004390,NM_001243756,NM_001033047,NM_004087,NM_003015,NM_003012,NM_003013,NM_001178065,NM_020975,NM_003036,NM_004158,NM_001257206,NM_004143,NM_021973,NM_006167,NM_020859,NM_001005366,NM_001005333,NM_006015,NM_001256312,NM_172037,NM_024915,NM_001010926,NM_012401,NM_001122742…	true	-0.0951949	0.000856935
platelet aggregation(GO:0070527)	49	152	NM_004214,NM_007269,NM_004078,NM_021871,NM_000212,NM_014000,NM_006216,NM_006219,NM_006206,NM_006254,NM_006257,NM_006258,NM_006289,NM_005141,NM_006293,NM_000419,NM_000508,NM_000509,NM_000518,NM_014331,NM_000697,NM_199355,NM_022788,NM_000820,NM_018366,NM_001456,NM_001014795,NM_002886,NM_015143,NM_001614,NM_032873,NM_002737,NM_002664,NM_002649,NM_001540,NM_001978,NM_198594,NM_033131,NM_139022,NM_001…	true	-0.220413	0.000858649
glomerular visceral epithelial cell development(GO:0072015)	8	14	NM_014625,NM_012301,NM_003870,NM_004998,NM_004797,NM_004646,NM_001202,NM_002292	true	-0.436806	0.000860001
regulation of cell projection organization(GO:0031344)	339	784	NM_004210,NM_001122679,NM_173808,NM_018084,NM_007283,NM_007284,NM_014683,NM_018014,NM_001271938,NM_012437,NM_012428,NM_014714,NM_004263,NM_004309,NM_007127,NM_014780,NM_057159,NM_014809,NM_001080395,NM_013366,NM_014845,NM_014932,NM_014912,NM_019850,NM_144707,NM_004114,NM_007314,NM_020929,NM_003030,NM_001037442,NM_174878,NM_020975,NM_003061,NM_001011515,NM_020999,NM_004162,NM_044472,NM_004186,NM_0…	true	-0.0893457	0.00086525
platelet degranulation(GO:0002576)	89	234	NM_001278344,NM_001204303,NM_001122606,NM_001257389,NM_007351,NM_004106,NM_003005,NM_013995,NM_021871,NM_006000,NM_001010931,NM_001010934,NM_000039,NM_000034,NM_000014,NM_000062,NM_005022,NM_000934,NM_000130,NM_000129,NM_000132,NM_017491,NM_006367,NM_000212,NM_014000,NM_000313,NM_000301,NM_005184,NM_006289,NM_005141,NM_000419,NM_000412,NM_001002236,NM_133379,NM_133378,NM_000477,NM_021109,NM_02113…	true	-0.168441	0.000889498
cell chemotaxis(GO:0060326)	188	459	NM_001037341,NM_014705,NM_004343,NM_004313,NM_057159,NM_013372,NM_004054,NM_004072,NM_004106,NM_013447,NM_003019,NM_007365,NM_004145,NM_004139,NM_020820,NM_006113,NM_006072,NM_020672,NM_001010931,NM_001010934,NM_001271749,NM_001100812,NM_207032,NM_012398,NM_001204088,NM_005084,NM_020441,NM_000081,NM_005026,NM_018890,NM_001024629,NM_000928,NM_000118,NM_000131,NM_006419,NM_000245,NM_000222,NM_00636…	true	0.106035	0.000899681
gland development(GO:0048732)	353	635	NM_004210,NM_007214,NM_007256,NM_018055,NM_012448,NM_004364,NM_004366,NM_004360,NM_004324,NM_004329,NM_004341,NM_004316,NM_001204315,NM_014781,NM_001030055,NM_014950,NM_004064,NM_007313,NM_003014,NM_003012,NM_004179,NM_013993,NM_021973,NM_021975,NM_021958,NM_006167,NM_174936,NM_006147,NM_001005353,NM_006079,NM_006080,NM_012182,NM_006060,NM_012265,NM_001010931,NM_001010934,NM_020648,NM_012405,NM_0…	true	-0.0872298	0.000911112
organelle fusion(GO:0048284)	66	150	NM_012437,NM_004324,NM_014802,NM_014832,NM_014874,NM_004052,NM_013442,NM_003037,NM_001257999,NM_006152,NM_006113,ENST00000310421,NM_020783,NM_020665,NM_013978,NM_006496,NM_017516,NM_006373,NM_014178,NM_005370,NM_016068,NM_006796,NM_000700,NM_005639,NM_005638,NM_030907,NM_005868,NM_005819,NM_032663,NM_002866,NM_015163,NM_025054,NM_001626,NM_015395,NM_001002857,NM_138764,NM_017817,NM_017812,NM_0017…	true	-0.19235	0.000922156
organelle localization(GO:0051640)	268	617	NM_004218,NM_019619,NM_001256012,NM_001030005,NM_012437,NM_052893,NM_018101,NM_004333,NM_018116,NM_018115,NM_018174,NM_014747,NM_014750,NM_018190,NM_018138,NM_018136,NM_018164,NM_007166,NM_173648,NM_013388,NM_014866,NM_207577,NM_014874,NM_014932,NM_001242369,NM_004082,ENST00000394884,NM_007308,NM_003026,NM_020921,NM_020946,NM_014970,NM_014989,NM_144718,NM_003081,NM_003061,NM_144688,NM_004162,NM_0…	true	-0.0995922	0.000924697
heart process(GO:0003015)	160	364	NM_001256022,NM_001037341,NM_001243812,NM_004318,NM_001099404,NM_019888,NM_019884,ENST00000256969,NM_020971,NM_003047,NM_001005291,NM_021995,NM_174934,NM_079420,NM_006080,NM_006037,NM_001204218,NM_012282,NM_012283,NM_020683,NM_012259,NM_207032,NM_172201,ENST00000278947,ENST00000380573,NM_000022,NM_018896,NM_006541,NM_006514,NM_199460,NM_000152,NM_000165,NM_000256,NM_000258,NM_000257,NM_000238,NM_…	true	-0.127464	0.000938487
cellular response to fibroblast growth factor stimulus(GO:0044344)	210	543	NM_078467,NM_004214,NM_014679,NM_012428,NM_004333,NM_004322,NM_019884,NM_001278160,NM_207578,NM_019851,NM_004036,NM_004064,NM_004113,NM_003029,NM_003012,NM_007373,NM_001174066,NM_020963,NM_020996,NM_004157,NM_001257206,NM_006139,NM_012154,NM_012199,NM_020638,NM_020637,NM_013982,NM_207123,NM_020546,NM_000088,NM_005027,NM_018837,NM_005026,NM_005020,NM_001024630,NM_000924,NM_000142,NM_022475,NM_0189…	true	-0.111572	0.000973035
ribosomal small subunit biogenesis(GO:0042274)	17	40	NM_004053,ENST00000401695,NM_016037,NM_005617,NM_014503,NM_005702,NM_015462,NM_001025071,NM_033112,NM_003703,NM_001011,NM_001010,NM_001020,NM_001022,NM_001031,NM_001026,NM_001024	true	0.212622	0.000973443
protein targeting to plasma membrane(GO:0072661)	19	58	NM_001204404,NM_014600,NM_018026,NM_020987,NM_000037,NM_020477,NM_006259,NM_006815,NM_000820,NM_001020818,NM_001728,NM_033120,NM_001083602,NM_003557,NM_178313,NM_002579,NM_003128,NM_001149,NM_001148	true	-0.320397	0.000984576
phagocytosis(GO:0006909)	172	493	NM_173847,NM_007261,NM_018053,NM_007275,NM_001178126,NM_004327,NM_004343,NM_001030059,NM_004383,NM_001278497,NM_014880,NM_007355,NM_004108,NM_004106,NM_007314,NM_007313,NM_003019,NM_001174104,NM_004139,NM_044472,NM_001080529,NM_021913,NM_021962,NM_006153,NM_012072,NM_006113,NM_001005386,NM_006098,NM_001039802,NM_001038707,NM_001278556,NM_001135021,NM_012398,NM_001017963,NM_001024809,NM_012334,NM_…	true	-0.122642	0.000986451
regulation of megakaryocyte differentiation(GO:0045652)	18	57	ENST00000377803,NM_021968,NM_001034077,NM_006384,NM_001029976,NM_000460,NM_015156,NM_001536,NM_033128,NM_002129,NM_003540,NM_003543,NM_003542,NM_003547,NM_175054,NM_032107,NM_002619,NM_002397	true	0.210163	0.000988055
epithelial to mesenchymal transition(GO:0001837)	90	195	NM_173849,NM_014780,NM_007178,NM_057168,NM_013372,NM_173689,NM_003012,NM_003013,NM_020909,NM_003068,NM_001010931,NM_001010934,NM_012259,NM_207197,NM_020532,NM_012342,NM_182983,ENST00000359999,NM_000088,NM_000192,NM_006341,NM_021784,NM_022343,NM_005233,NM_001003652,NM_017617,NM_000346,NM_016269,NM_058244,NM_000474,NM_021073,NM_005450,NM_005442,NM_030761,NM_005359,NM_133635,NM_022970,NM_000660,NM_0…	true	-0.166117	0.000994863
protein K6-linked ubiquitination(GO:0085020)	8	26	NM_007300,NM_014176,NM_000465,NM_014501,NM_002938,NM_005977,NM_015983,NM_004562	true	0.241924	0.000999403
negative regulation of cardiac muscle cell proliferation(GO:0060044)	6	12	NM_021818,NM_001024847,NM_000165,NM_000192,NM_005450,NM_006744	true	-0.4749	0.00100286
response to unfolded protein(GO:0006986)	141	324	NM_014685,NM_014607,NM_014613,NM_014674,NM_004287,NM_004324,NM_004343,NM_007126,NM_014760,NM_014780,NM_057161,NM_004381,NM_019884,NM_013388,NM_014874,NM_004094,ENST00000262455,NM_004082,NM_004083,NM_007348,NM_007355,NM_003029,NM_001244710,NM_021979,NM_006164,NM_006145,NM_006010,NM_006005,NM_007034,NM_012266,NM_001017963,NM_001135005,NM_012328,NM_172230,NM_005080,NM_000018,NM_020470,NM_198440,NM_0…	true	-0.134513	0.00101244
neutrophil migration(GO:1990266)	61	108	NM_001037341,NM_004054,NM_004106,NM_004139,NM_020820,NM_006113,NM_001271749,NM_207032,NM_012398,NM_005026,NM_018890,NM_000928,NM_000211,NM_018643,NM_000331,NM_006274,NM_156039,ENST00000006053,NM_148910,NM_005428,NM_005337,NM_000576,NM_000584,NM_000619,NM_000632,NM_005621,NM_002995,NM_002989,NM_002982,NM_002965,NM_002964,NM_002872,NM_001338,NM_016584,NM_001736,NM_022162,NM_002737,NM_001025158,NM_0…	true	0.156352	0.00101282
necroptotic process(GO:0070266)	28	67	NM_001278464,NM_012062,NM_012237,NM_000043,NM_001127184,NM_017672,NM_000546,NM_000594,NM_006871,NM_000639,NM_005729,NM_015247,NM_002863,NM_001202519,NM_001162383,NM_138575,NM_001126118,NM_031229,NM_003651,NM_003879,NM_003824,NM_003804,NM_003265,NM_004723,NM_152649,NM_001165,NM_001166,NM_001151	true	0.191235	0.0010288
cell-cell adhesion(GO:0098609)	192	538	NM_001122679,NM_001277285,NM_012428,NM_014718,NM_052836,NM_004360,NM_004361,NM_013340,NM_014932,NM_004062,NM_004063,NM_004061,NM_144779,NM_144765,NM_003005,NM_014970,NM_020975,NM_020982,NM_001171092,NM_021924,NM_001130861,NM_020703,NM_021810,NM_006016,NM_020766,NM_012131,NM_207361,NM_012129,NM_001111319,NM_020693,NM_020630,NM_006580,NM_181847,NM_018902,NM_022478,NM_018930,NM_018939,NM_018934,NM_0…	true	-0.115902	0.00103328
regulation of cell adhesion(GO:0030155)	329	727	NM_004227,NM_004235,NM_173843,NM_173828,NM_014634,NM_018055,NM_018012,NM_012448,NM_012431,NM_012425,NM_004288,NM_004360,NM_004333,NM_004343,NM_004309,NM_007124,NM_144997,NM_013385,NM_014875,NM_014840,NM_001033047,NM_013427,NM_007314,NM_007313,NM_144779,NM_003012,NM_003013,NM_014970,NM_020909,NM_020975,NM_003068,NM_020987,NM_004148,NM_044472,NM_001271534,NM_020820,NM_012090,NM_006113,NM_006125,NM_…	true	-0.0892722	0.0010399
endothelial cell migration(GO:0043542)	123	318	NM_004235,NM_014707,NM_001080391,NM_013372,NM_004093,NM_014909,NM_001113490,NM_000029,NM_000042,NM_000039,NM_000020,NM_020441,NM_005044,NM_000963,NM_133265,NM_199418,NM_001024629,NM_006419,NM_000267,NM_000245,NM_006384,NM_000212,NM_005251,NM_005238,NM_022367,NM_001018070,NM_000314,NM_133459,NM_133468,NM_006218,NM_017617,NM_001002295,NM_005139,NM_005163,NM_022334,NM_000412,NM_133376,NM_017679,NM_1…	true	-0.143137	0.00104119
meiotic nuclear division(GO:0007126)	140	325	NM_004237,NM_018087,NM_018068,NM_014647,NM_012447,NM_012444,NM_004343,NM_018136,NM_144998,NM_057161,NM_001205262,NM_019885,NM_020937,NM_144688,NM_175932,XM_005273551,NM_021979,NM_021951,NM_001005386,NM_007068,NM_001038633,NM_012291,NM_012237,NM_012415,NM_001136505,NM_001136566,NM_207189,NM_001083965,NM_001017975,NM_020530,NM_000051,NM_198393,NM_000921,NM_000135,NM_006455,NM_000179,NM_138804,NM_00…	true	0.117755	0.00104623
regulation of mitochondrial fusion(GO:0010635)	6	16	NM_004052,NM_006373,NM_024544,NM_017933,NM_145243,NM_004562	true	-0.473465	0.00105979
sister chromatid segregation(GO:0000819)	75	159	NM_018101,NM_014750,NM_001100399,NM_014865,NM_173685,NM_001257281,ENST00000394884,NM_001100400,NM_006101,NM_001032293,NM_001206999,NM_012291,NM_001270519,NM_198393,NM_006461,NM_006306,NM_017553,NM_022346,NM_133433,NM_000321,NM_133379,NM_133378,NM_005496,NM_006999,NM_005445,NM_016359,NM_001098507,NM_015032,NM_001142761,NM_001265577,NM_080668,NM_024094,NM_015261,NM_182489,NM_032636,NM_005858,NM_005…	true	0.146324	0.00106329
cardiac chamber morphogenesis(GO:0003206)	92	188	NM_019884,NM_003030,NM_003013,NM_021973,NM_006174,NM_012082,NM_006079,NM_021818,NM_020733,NM_024915,NM_012259,NM_000965,NM_000910,NM_000192,NM_020335,NM_000256,NM_000258,NM_000257,NM_006379,NM_005251,NM_005257,NM_018670,NM_000366,NM_000364,NM_000363,NM_017617,NM_006237,NM_001002295,NM_133330,NM_000432,NM_054014,NM_000459,NM_006988,NM_019074,NM_022970,NM_006744,NM_018222,NM_014482,NM_005631,NM_000…	true	-0.16356	0.00106466
meiosis I(GO:0007127)	79	195	NM_004237,NM_018087,NM_018068,NM_012447,NM_012444,NM_144998,NM_057161,NM_001205262,NM_020937,NM_144688,NM_175932,XM_005273551,NM_021951,NM_007068,NM_012291,NM_012415,NM_001136505,NM_001136566,NM_207189,NM_001017975,NM_000051,NM_006455,NM_000179,NM_000249,NM_000251,NM_133509,NM_133510,NM_005236,NM_020227,NM_006265,NM_020066,NM_014258,NM_133629,NM_001142571,NM_001143764,NM_005590,NM_199294,NM_00110…	true	0.143883	0.00106547
regulation of phosphatidylinositol 3-kinase activity(GO:0043551)	30	89	NM_004235,NM_052880,NM_004119,NM_006113,NM_020526,NM_005027,NM_018890,NM_000142,NM_000222,NM_005235,NM_006206,NM_006274,NM_000459,NM_000660,NM_005544,NM_032552,NM_002989,NM_176875,NM_001093772,NM_022162,NM_138709,NM_001838,NM_001042747,NM_173174,NM_001006943,NM_181523,NM_002608,NM_002609,NM_002350,NM_153831	true	-0.266566	0.00106632
vascular endothelial growth factor receptor signaling pathway(GO:0048010)	41	114	NM_013451,NM_012193,NM_001024629,NM_198400,NM_000212,NM_005251,ENST00000405431,NM_000576,NM_000638,NM_013232,NM_014567,NM_032552,NM_002982,NM_001453,NM_015170,NM_002827,NM_005954,NM_002742,NM_001668,NM_016457,NM_002729,NM_002738,NM_002632,NM_001540,NM_138709,NM_024600,NM_024756,NM_173174,NM_002020,NM_001170714,NM_003862,NM_003873,NM_001001555,NM_004759,NM_001204,NM_181054,NM_002253,NM_002205,NM_0…	true	-0.234133	0.00106703
integrin-mediated signaling pathway(GO:0007229)	88	271	NM_001243756,NM_001257389,NM_004106,NM_006113,NM_207191,NM_207197,NM_001135000,NM_182966,NM_000039,NM_000090,NM_006403,NM_000210,NM_000211,NM_000212,NM_000213,NM_018695,NM_001004439,NM_018715,NM_022334,NM_000419,NM_133376,NM_006988,NM_005428,NM_005353,NM_130760,NM_000632,NM_014387,ENST00000360635,NM_014495,NM_000888,NM_000889,NM_000885,NM_000887,NM_005560,NM_014567,NM_001014795,NM_001424,NM_00138…	true	-0.166305	0.00111627
embryonic skeletal joint development(GO:0072498)	13	24	NM_003030,NM_000127,NM_005450,NM_001098210,NM_021192,NM_005523,NM_001904,NM_001844,NM_002181,NM_053001,NM_145260,NM_001202,NM_003395	true	-0.364867	0.00112395
establishment of organelle localization(GO:0051656)	216	497	NM_004218,NM_001256012,NM_001030005,NM_012437,NM_052893,NM_018101,NM_004333,NM_018115,NM_018174,NM_014747,NM_014750,NM_018190,NM_007166,NM_013388,NM_014866,NM_014932,NM_001242369,NM_004082,ENST00000394884,NM_007308,NM_003026,NM_020946,NM_014970,NM_014989,NM_144718,NM_003081,NM_003061,NM_144688,NM_004162,NM_004161,NM_044472,NM_004193,NM_004182,NM_020824,NM_021982,NM_006152,NM_006185,NM_006101,NM_0…	true	-0.108662	0.00113409
ncRNA metabolic process(GO:0034660)	329	1045	NM_007204,NM_018072,NM_018068,NM_014672,NM_019606,NM_004280,NM_018122,NM_018127,NM_018114,NM_014740,NM_018142,NM_018130,NM_014793,NM_007080,NM_001034996,NM_013393,NM_014953,NM_004053,NM_144709,NM_001257281,NM_173717,NM_013417,NM_014976,NM_007362,NM_003096,NM_003094,NM_003095,NM_004184,NM_004175,XM_005273551,NM_020810,NM_134323,NM_006191,NM_021975,NM_012091,NM_001256456,NM_001080453,NM_012154,NM_0…	true	0.0823158	0.00113797
positive regulation of skeletal muscle cell differentiation(GO:2001016)	6	18	NM_019885,NM_001030273,NM_080647,NM_080646,NM_002081,NM_002397	true	-0.471407	0.00114644
glial cell-derived neurotrophic factor receptor signaling pathway(GO:0035860)	5	15	NM_018837,NM_005264,NM_001002295,NM_001495,NM_015170	true	-0.498955	0.001153
L-proline biosynthetic process(GO:0055129)	5	12	NM_013328,NM_000274,NM_006907,NM_002860,NM_153824	true	-0.498861	0.00115696
regulation of extrinsic apoptotic signaling pathway via death domain receptors(GO:1902041)	46	92	NM_007262,NM_001080391,NM_007300,NM_003012,NM_003013,NM_021871,NM_001256312,NM_007051,NM_130475,NM_001017368,NM_000201,NM_201397,NM_001127184,NM_005141,NM_006290,NM_014112,NM_021127,NM_000447,NM_000508,NM_000509,NM_021073,NM_005414,NM_000603,NM_000602,NM_002880,NM_001202519,NM_001162383,NM_015322,NM_022152,NM_182521,NM_194271,NM_033129,NM_001042492,NM_002133,NM_003682,NM_003879,NM_004938,NM_00382…	true	0.168126	0.00116289
regulation of actin cytoskeleton reorganization(GO:2000249)	29	78	NM_012431,NM_007314,NM_007313,NM_006105,NM_006118,NM_012120,NM_018842,ENST00000395358,NM_005211,NM_006206,NM_005157,NM_014172,NM_017679,NM_001136001,NM_000459,NM_005335,NM_005343,NM_001007156,NM_000660,NM_000759,ENST00000394480,NM_014578,NM_001348,NM_001012338,NM_173174,NM_002005,NM_004935,NM_002527,NM_002530	true	-0.268487	0.0011696
regulation of ARF protein signal transduction(GO:0032012)	45	181	NM_004227,NM_012455,NM_014716,NM_057169,NM_013385,NM_004193,NM_001244888,NM_006076,NM_012180,NM_001135190,NM_001135187,NM_001044305,NM_012287,NM_001122772,NM_020340,NM_022481,NM_006420,NM_006421,NM_014030,NM_018404,NM_006869,NM_001143778,NM_015075,NM_022733,NM_014570,NM_015232,NM_015230,NM_032552,NM_031946,XM_005251136,NM_002779,NM_001247996,NM_015310,NM_030649,NM_138709,NM_017707,NM_001042535,NM…	true	-0.223462	0.00117013
regulation of peptide hormone secretion(GO:0090276)	181	410	NM_004291,NM_004322,NM_007117,NM_014752,NM_001267843,NM_014807,NM_001205293,NM_207578,NM_004041,NM_004123,NM_003012,NM_174889,NM_014980,NM_001178065,NM_007375,NM_003081,NM_004157,NM_001005291,NM_021928,NM_021995,NM_021969,NM_006168,NM_006105,NM_001039966,NM_021871,NM_173560,NM_024959,NM_007023,NM_001030273,NM_001256627,NM_012283,NM_020665,NM_012240,NM_207042,NM_012215,NM_207168,NM_006516,NM_00094…	true	-0.117964	0.00117306
regulation of nitric oxide biosynthetic process(GO:0045428)	44	128	NM_014697,NM_004235,NM_007355,NM_012137,NM_001122742,NM_001017963,NM_013974,NM_000029,NM_000050,NM_000961,NM_000963,NM_000125,NM_000208,NM_000207,NM_000201,NM_005228,NM_000297,NM_005163,NM_001008504,NM_000518,NM_005348,NM_201282,NM_201283,NM_000572,NM_000576,NM_000594,NM_000589,NM_000619,NM_000686,NM_031900,NM_025079,NM_001753,NM_002852,NM_001684,NM_001025109,NM_001955,NM_182919,NM_001773,NM_1385…	true	0.169995	0.001183
NLRP3 inflammasome complex assembly(GO:0044546)	5	6	NM_012237,NM_002759,NM_001135652,NM_001031722,NM_001243133	true	0.258089	0.0011878
carnitine shuttle(GO:0006853)	8	25	NM_000098,NM_000387,NM_006252,NM_016203,NM_005399,NM_152246,NM_001093,NM_001031847	true	0.240405	0.00119522
positive regulation of neuron differentiation(GO:0045666)	72	158	NM_001204424,NM_014618,NM_018008,BC021560,NM_004316,NM_007148,NM_018098,NM_001174066,NM_020999,NM_021963,NM_006168,NM_006160,NM_006161,NM_001080500,NM_012210,NM_001204088,NM_000965,NM_001024613,NM_006339,NM_021784,NM_005172,NM_005103,NM_170695,NM_001128128,NM_133376,NM_016235,NM_000554,NM_001143986,NM_030792,NM_199051,NM_000619,NM_006898,NM_000683,NM_000799,NM_021165,NM_014571,NM_005721,NM_024019…	true	-0.181142	0.00120543
negative regulation of phosphorylation(GO:0042326)	303	776	NM_078467,NM_019619,NM_004235,NM_007207,NM_007236,NM_001256053,NM_014634,NM_007262,NM_007261,NM_007271,NM_012479,NM_004252,NM_004346,NM_004324,NM_004323,NM_004310,NM_144949,NM_007199,NM_144997,NM_007178,NM_004393,NM_004383,NM_173647,NM_173657,NM_001278160,NM_013372,NM_078626,NM_004090,NM_014915,NM_014906,NM_004064,NM_007313,NM_004124,NM_003015,NM_003014,NM_003012,NM_003013,NM_020972,NM_001037494,…	true	-0.0916445	0.00122114
positive regulation of mitotic cell cycle spindle assembly checkpoint(GO:0090267)	6	17	NM_001100119,NM_001258213,NM_016141,NM_182625,NM_003292,NM_002358	true	0.250985	0.00123009
cellular response to interleukin-1(GO:0071347)	41	113	NM_173843,NM_004345,NM_007199,NM_003012,NM_021975,NM_006167,NM_000961,NM_000201,NM_000346,NM_005141,NM_016270,NM_001288837,NM_014272,NM_000584,NM_013258,NM_014391,NM_005328,NM_000781,NM_021231,NM_030955,NM_138330,NM_182493,NM_032552,NM_002982,NM_015192,NM_153281,NM_024309,NM_001570,NM_001569,NM_001964,NM_001955,NM_138709,NM_003998,NM_182734,NM_002139,NM_033158,NM_002190,NM_003549,NM_003942,NM_003…	true	0.172756	0.00124218
kynurenine metabolic process(GO:0070189)	11	29	NM_004059,NM_001010982,NM_016228,NM_001008661,NM_005651,NM_194294,NM_001145526,NM_002164,NM_003679,NM_002080,NM_001032998	true	0.227803	0.0012486
replacement ossification(GO:0036075)	25	49	NM_000088,NM_001024630,NM_000142,NM_000288,NM_005221,NM_000478,NM_000459,NM_001143804,NM_005529,NM_001718,NM_005920,NM_005967,NM_005966,NM_080801,NM_005941,NM_001567,NM_017813,NM_001844,NM_001077490,NM_001130518,NM_003862,NM_004995,NM_002427,NM_002397,NM_001202	true	-0.283479	0.00125655
endochondral ossification(GO:0001958)	25	49	NM_000088,NM_001024630,NM_000142,NM_000288,NM_005221,NM_000478,NM_000459,NM_001143804,NM_005529,NM_001718,NM_005920,NM_005967,NM_005966,NM_080801,NM_005941,NM_001567,NM_017813,NM_001844,NM_001077490,NM_001130518,NM_003862,NM_004995,NM_002427,NM_002397,NM_001202	true	-0.283479	0.00125655
activation of signaling protein activity involved in unfolded protein response(GO:0006987)	65	158	NM_014685,NM_014674,NM_004287,NM_004343,NM_014760,NM_014780,NM_057161,NM_019884,NM_013388,NM_004094,NM_004082,NM_004083,NM_007348,NM_003029,NM_001244710,NM_006005,NM_012328,NM_172230,NM_005080,NM_000018,NM_020470,NM_170707,NM_000391,NM_006244,NM_006289,NM_014189,NM_001257145,NM_005347,NM_000596,NM_000584,NM_019107,NM_016306,NM_006810,NM_014445,NM_021203,NM_014593,NM_005742,NM_005730,NM_001012511,…	true	-0.188694	0.00128676
cellular response to virus(GO:0098586)	24	51	NM_004322,NM_004031,NM_020746,NM_005270,NM_017631,NM_020119,NM_201402,NM_014314,NM_024119,NM_022168,NM_001571,NM_015578,NM_024625,NM_138621,NM_138578,NM_033229,NM_001282144,NM_001256872,NM_001256873,NM_001256869,NM_003270,NM_001212,NM_001165,NM_001166	true	0.19587	0.00129021
osteoclast development(GO:0036035)	9	18	NM_020223,NM_000430,NM_001002857,NM_024652,NM_003701,NM_213602,NM_002343,NM_001183,NM_003332	true	-0.410409	0.00129598
virion assembly(GO:0019068)	20	57	NM_014688,ENST00000425020,NM_004161,NM_018955,NM_198490,NM_006292,NM_021130,NM_021009,NM_030981,NM_138361,NM_002954,NM_024667,NM_017966,NM_001077621,NM_144628,NM_004808,NM_002569,NM_001033930,NM_183057,NM_152415	true	-0.308484	0.00129907
positive regulation of granulocyte chemotaxis(GO:0071624)	23	34	NM_004054,NM_004139,NM_020672,NM_018890,NM_006274,NM_148910,NM_005337,NM_000589,NM_000584,NM_002995,NM_002989,NM_002963,NM_002872,NM_016584,NM_001025158,NM_001557,NM_001957,NM_001955,NM_001838,NM_001039661,NM_003248,NM_001212,ENST00000378845	true	0.197597	0.00130125
positive regulation of purine nucleotide biosynthetic process(GO:1900373)	73	162	NM_001278497,NM_019888,NM_019884,NM_006180,NM_001039966,NM_020683,NM_001267609,NM_182978,NM_000025,NM_000024,NM_000054,NM_000960,NM_000906,NM_000164,ENST00000394237,NM_000267,NM_000233,NM_006366,NM_006367,NM_001018065,NM_000315,NM_005184,NM_198184,NM_005100,NM_021081,NM_000529,NM_130806,NM_006888,NM_013261,NM_000677,NM_000675,NM_000676,NM_000684,NM_000794,NM_000798,NM_000756,NM_000823,NM_005502,N…	true	-0.178857	0.0013054
positive regulation of nucleotide biosynthetic process(GO:0030810)	73	162	NM_001278497,NM_019888,NM_019884,NM_006180,NM_001039966,NM_020683,NM_001267609,NM_182978,NM_000025,NM_000024,NM_000054,NM_000960,NM_000906,NM_000164,ENST00000394237,NM_000267,NM_000233,NM_006366,NM_006367,NM_001018065,NM_000315,NM_005184,NM_198184,NM_005100,NM_021081,NM_000529,NM_130806,NM_006888,NM_013261,NM_000677,NM_000675,NM_000676,NM_000684,NM_000794,NM_000798,NM_000756,NM_000823,NM_005502,N…	true	-0.178857	0.0013054
regulation of protein localization to plasma membrane(GO:1903076)	50	138	NM_001034954,NM_004383,NM_004068,NM_004087,NM_020922,NM_012096,NM_001039966,NM_006098,NM_007033,NM_012249,NM_018965,NM_001005743,NM_020399,NM_006330,NM_006384,NM_006243,NM_005163,NM_001288653,NM_133376,NM_130830,NM_001098424,NM_014448,NM_138370,NM_005856,NM_001343,NM_002740,NM_001665,NM_001663,NM_022152,NM_016492,NM_001003954,NM_015627,NM_138794,NM_015526,NM_138578,NM_017933,NM_033120,NM_00113945…	true	-0.211488	0.00132184
regulation of receptor internalization(GO:0002090)	27	68	NM_004313,NM_001257389,NM_013372,NM_004041,NM_003014,NM_003026,NM_174936,NM_001038633,NM_012242,NM_012407,NM_012301,NM_017651,NM_000450,NM_001024227,NM_201278,NM_000795,NM_018373,NM_002973,NM_001365,NM_032810,NM_015564,NM_001191323,NM_017988,NM_033131,NM_002527,NM_178839,NM_001146	true	-0.273805	0.00132918
positive regulation of phospholipase activity(GO:0010518)	87	219	NM_057159,NM_207578,NM_004036,NM_013427,NM_007314,NM_001174066,NM_004157,NM_006125,NM_006056,NM_001122742,NM_020546,ENST00000380573,NM_000029,NM_006572,NM_005020,NM_000928,NM_000924,NM_000125,NM_000142,NM_000139,NM_000222,NM_005228,NM_020167,NM_001003683,NM_006206,NM_005184,NM_006254,NM_001164761,NM_134442,NM_170604,NM_001136001,NM_000483,NM_000450,NM_021116,NM_005400,NM_201282,NM_201283,NM_00688…	true	-0.164774	0.00133422
monovalent inorganic cation transport(GO:0015672)	471	1393	NM_078483,NM_078470,NM_004231,NM_001204404,NM_007236,NM_018057,NM_001037329,NM_018018,NM_172362,NM_012450,NM_172347,NM_012434,NM_172375,NM_001278344,NM_004255,NM_004252,NM_001034837,NM_004274,NM_018112,NM_007100,NM_007124,NM_001099404,ENST00000374086,ENST00000374084,NM_004375,NM_004374,NM_004373,NM_001257389,NM_013348,NM_173653,NM_001011547,NM_001011554,NM_001011552,NM_013387,NM_001256214,NM_0198…	true	-0.0733234	0.00133678
corticosteroid receptor signaling pathway(GO:0031958)	17	64	NM_004343,NM_001267843,NM_004075,NM_001039966,NM_006015,NM_001030273,NM_198400,NM_006328,NM_018640,NM_014071,NM_001018077,NM_021117,NM_002634,NM_004972,NM_004898,NM_002616,NM_003405	true	-0.327071	0.00135363
lung development(GO:0030324)	159	286	NM_018055,NM_014660,NM_004364,NM_004329,NM_004316,NM_018189,NM_004390,NM_004095,NM_003019,NM_001137675,NM_001005291,NM_006185,NM_012082,NM_006116,NM_020856,NM_021818,NM_020733,NM_172037,ENST00000373670,NM_024915,NM_012391,NM_001024847,NM_005069,NM_000022,NM_000052,NM_198389,NM_000168,NM_001005743,NM_000193,NM_000192,NM_022475,NM_020335,NM_018948,NM_006408,NM_021784,NM_138815,NM_006303,NM_00116461…	true	-0.123963	0.00135565
centrosome organization(GO:0051297)	75	220	NM_001100119,NM_014629,NM_014675,NM_014711,NM_004365,NM_004344,NM_014736,NM_007186,NM_018097,NM_001114121,NM_007300,NM_014985,NM_014984,NM_144718,NM_004182,NM_001005271,NM_001114395,NM_001005207,NM_001037738,NM_006197,NM_012124,NM_000059,NM_170724,NM_018998,ENST00000380496,NM_201626,NM_017518,NM_000297,NM_014021,NM_017668,NM_017645,ENST00000243706,NM_016262,NM_018451,NM_030808,NM_014264,NM_005431…	true	0.143928	0.00139889
nucleotide-binding domain, leucine rich repeat containing receptor signaling pathway(GO:0035872)	51	159	NM_052814,NM_052813,NM_001204303,NM_001033053,NM_007355,NM_021975,NM_006116,NM_006092,NM_001032288,NM_020529,NM_018955,NM_006290,NM_001079821,NM_000484,NM_021009,NM_000633,NM_013258,NM_021209,NM_015093,NM_138348,NM_015247,NM_002954,NM_153497,NM_002758,NM_022162,NM_015368,NM_001570,NM_001569,NM_001556,NM_031483,NM_003978,NM_145065,NM_138578,NM_138554,NM_194271,NM_033292,NM_152787,NM_003821,NM_0330…	true	0.161659	0.00141624
stem cell development(GO:0048864)	235	474	NM_004229,NM_004235,NM_173849,NM_018083,NM_014633,NM_018068,NM_018055,NM_004264,NM_004268,NM_004269,NM_004270,NM_004333,NM_004326,NM_004329,NM_018136,NM_014780,NM_014795,NM_007178,NM_057168,NM_001099412,NM_014815,NM_004380,NM_013372,NM_014943,NM_019852,NM_173689,NM_001257281,NM_007358,NM_003012,NM_003013,NM_020909,NM_020975,NM_003068,NM_003036,ENST00000262519,NM_004186,XM_005273551,NM_021920,NM_0…	true	-0.102318	0.00141754
positive regulation of GTPase activity(GO:0043547)	484	1451	NM_014688,NM_004227,NM_014689,NM_001204418,NM_001204424,NM_014629,NM_014636,NM_018071,NM_014604,NM_012455,NM_012454,NM_012425,NM_014715,NM_014716,NM_014705,NM_001034853,NM_004292,NM_052843,NM_052870,NM_018125,NM_004330,NM_004327,NM_001277335,NM_019555,NM_004309,NM_004308,NM_001204300,NM_014725,NM_144973,NM_144977,NM_018173,NM_014744,NM_144967,NM_007118,NM_014783,NM_007197,NM_014786,NM_018157,NM_0…	true	-0.0718671	0.0014414
single-organism membrane fusion(GO:0044801)	78	187	NM_012437,NM_004324,NM_014802,NM_014832,NM_014874,NM_001278113,NM_004052,NM_013442,NM_001174044,NM_003037,NM_001257999,NM_006152,NM_006178,NM_006113,NM_001080483,ENST00000310421,NM_020783,NM_020665,NM_020641,NM_013978,NM_006496,NM_017516,NM_006373,NM_014178,NM_005424,NM_005370,NM_000624,NM_016068,NM_006796,NM_000700,NM_005639,NM_005638,NM_030907,NM_005868,NM_005819,NM_032663,NM_002866,NM_015163,N…	true	-0.172056	0.00144862
cellular response to calcium ion(GO:0071277)	41	106	NM_004333,NM_004318,NM_018098,ENST00000377494,NM_006160,NM_013943,NM_000070,NM_198056,NM_005252,NM_133492,NM_000335,NM_000421,NM_006989,NM_000567,NM_014412,NM_006732,NM_001503,NM_005729,NM_024103,NM_022097,NM_001629,NM_001286968,NM_001978,NM_001955,NM_001882,NM_173165,NM_003870,NM_003739,NM_178352,NM_001036,NM_213651,NM_001171894,NM_002397,NM_153819,NM_002229,NM_002228,NM_001140,NM_003392,NM_0324…	true	0.17128	0.00146505
meiotic cell cycle process(GO:1903046)	94	234	NM_004237,NM_018087,NM_018068,NM_012447,NM_012444,NM_018136,NM_144998,NM_057161,NM_001205262,NM_020937,NM_144688,NM_175932,XM_005273551,NM_021951,NM_001005386,NM_007068,NM_012291,NM_012415,NM_001136505,NM_001136566,NM_207189,NM_001017975,NM_000051,NM_006455,NM_000179,NM_138804,NM_000249,NM_000251,NM_133509,NM_133510,NM_005236,NM_020227,NM_006265,NM_020066,NM_014258,NM_005372,NM_133629,NM_00114257…	true	0.133001	0.00147387
collecting duct development(GO:0072044)	14	26	NM_001286351,NM_000296,NM_000297,NM_017617,NM_001009944,NM_058238,NM_000486,NM_003990,NM_214462,NM_004747,NM_003221,NM_001202,NM_003466,NM_003396	true	-0.349092	0.00148171
neutrophil mediated immunity(GO:0002446)	20	33	NM_007269,NM_007275,NM_004327,NM_021962,NM_012335,NM_182931,NM_000081,NM_000928,NM_000265,NM_005242,NM_018643,NM_005139,NM_000565,NM_000600,NM_005638,NM_001911,NM_003764,NM_003183,NM_003177,NM_032492	true	0.202195	0.00149965
ncRNA processing(GO:0034470)	232	699	NM_018072,NM_014672,NM_018127,NM_014740,NM_018142,NM_018130,NM_014793,NM_007080,NM_001034996,NM_013393,NM_014953,NM_004053,NM_144709,NM_173717,NM_014976,NM_020810,NM_134323,NM_006191,NM_012091,NM_001256456,NM_001080453,NM_012154,NM_006014,NM_020748,ENST00000401695,NM_207346,NM_012123,NM_007043,NM_024917,NM_012238,NM_001033678,NM_207118,NM_006567,NM_005033,NM_000987,NM_000996,NM_000969,NM_000975,N…	true	0.0935362	0.00151264
regulation of cellular amino acid metabolic process(GO:0006521)	57	151	NM_007262,NM_014614,NM_014814,NM_207581,NM_004159,NM_004152,NM_175932,NM_182983,NM_005047,NM_000903,NM_006503,NM_000207,NM_001002295,NM_006263,NM_005123,NM_148976,NM_006814,NM_000754,NM_176863,NM_005805,NM_001713,NM_002808,NM_002809,NM_002806,NM_002807,NM_002804,NM_002805,NM_002802,NM_002803,NM_002800,NM_002801,NM_002818,NM_002813,NM_002815,NM_002816,NM_002810,NM_002812,NM_002799,NM_002798,NM_002…	true	-0.197414	0.001519
branching morphogenesis of an epithelial tube(GO:0048754)	146	267	NM_012431,NM_004324,NM_004390,NM_001243756,NM_001033047,NM_004087,NM_003013,NM_001178065,NM_004158,NM_001257206,NM_004143,NM_006167,NM_001005333,NM_172037,NM_001122742,NM_013943,NM_001024847,NM_000029,NM_006572,NM_000044,NM_006522,NM_001024629,NM_000926,NM_000118,NM_017420,NM_000168,NM_000193,NM_022475,NM_020335,NM_021784,NM_000245,NM_001164617,NM_001079675,NM_020248,NM_005270,NM_005251,NM_000296…	true	-0.12777	0.00152745
kidney development(GO:0001822)	231	462	NM_014625,NM_007289,NM_018012,NM_004324,NM_004311,NM_014751,NM_144997,NM_004390,NM_001033047,NM_004087,NM_003012,NM_020975,NM_003052,NM_004158,NM_001257206,NM_004143,NM_006167,NM_174936,NM_020856,NM_001005333,NM_001032280,NM_006006,NM_006005,NM_172037,NM_020630,NM_001010926,NM_012301,NM_000029,NM_000038,NM_000019,NM_000067,NM_000076,NM_005044,NM_000091,NM_000092,NM_018837,NM_000965,NM_170724,NM_0…	true	-0.10244	0.00153516
hindlimb morphogenesis(GO:0035137)	34	47	NM_004329,NM_021926,NM_006006,NM_000965,NM_000966,NM_006492,NM_000193,NM_171999,NM_001164617,NM_017617,NM_000474,NM_014213,NM_030753,NM_015272,NM_002968,NM_002653,NM_001904,NM_017780,NM_002148,NM_033163,NM_053001,NM_002007,NM_001077490,NM_145260,NM_003221,NM_004774,ENST00000329255,NM_002448,NM_002449,NM_178565,NM_004625,NM_001202,NM_002336,NM_002285	true	-0.246461	0.00153642
maturation of SSU-rRNA(GO:0030490)	10	26	NM_004053,ENST00000401695,NM_005617,NM_014503,NM_015462,NM_001025071,NM_003703,NM_001022,NM_001026,NM_001024	true	0.229666	0.00154052
respiratory tube development(GO:0030323)	163	291	NM_018055,NM_014660,NM_004295,NM_004364,NM_004329,NM_004316,NM_018189,NM_004390,NM_004095,NM_003019,NM_001137675,NM_001005291,NM_006185,NM_012082,NM_006116,NM_020856,NM_021818,NM_020733,NM_172037,ENST00000373670,NM_024915,NM_012391,NM_001024847,NM_005069,NM_000022,NM_000052,NM_198389,NM_000168,NM_001005743,NM_000193,NM_000192,NM_022475,NM_020335,NM_018948,NM_006408,NM_021784,NM_138815,NM_006303,N…	true	-0.121062	0.00155105
insulin secretion(GO:0030073)	187	410	NM_004218,NM_007269,NM_001030005,NM_004291,NM_004322,NM_007117,NM_014752,NM_001267843,NM_014807,NM_001205293,NM_207578,NM_014904,NM_004041,NM_004123,NM_003012,NM_174889,NM_014980,NM_001178065,NM_007375,NM_003081,NM_003054,NM_004157,NM_001005291,NM_021928,NM_021995,NM_021969,NM_006168,NM_006105,NM_001039966,NM_173560,NM_024959,NM_007023,NM_001030273,NM_001256627,NM_012283,NM_020665,NM_172171,NM_01…	true	-0.113289	0.00155913
antigen processing and presentation of exogenous peptide antigen via MHC class I(GO:0042590)	76	269	NM_014614,NM_004343,NM_018144,NM_014814,NM_013336,NM_004048,NM_004079,NM_004106,NM_004159,NM_175932,NM_001242758,NM_172208,NM_005047,NM_018833,NM_006503,NM_000101,NM_018950,NM_018955,NM_000265,NM_006332,NM_000397,NM_006263,NM_000433,NM_148976,NM_001098478,NM_021009,NM_000593,NM_000631,NM_014302,NM_006814,NM_006808,NM_005313,NM_005575,NM_005514,NM_176863,NM_002954,NM_005805,NM_002808,NM_002809,NM_…	true	-0.172862	0.00157797
cell aging(GO:0007569)	79	248	NM_078467,NM_007289,NM_004329,NM_004343,NM_057168,NM_001099412,NM_001099436,NM_001114121,NM_014840,NM_014909,NM_173685,NM_007313,NM_007366,NM_001037738,NM_021994,NM_001030273,NM_012238,NM_000077,NM_000051,NM_000118,NM_020310,NM_020338,NM_001005735,NM_017489,NM_000201,NM_000314,NM_170707,NM_006254,NM_198253,NM_000474,NM_000454,NM_000546,NM_000553,NM_005430,NM_005343,NM_000602,NM_000633,NM_014397,N…	true	-0.169659	0.00159648
potassium ion transport(GO:0006813)	197	528	NM_001204404,NM_007236,NM_001037329,NM_172362,NM_172347,NM_172375,NM_001278344,NM_001034837,NM_004274,NM_018112,NM_013348,NM_001256214,NM_019842,NM_004064,NM_004087,NM_001257291,NM_013434,NM_144699,NM_020987,NM_004137,NM_001112741,NM_001159704,NM_006178,NM_001130849,NM_020897,NM_020708,NM_001204269,NM_001204218,NM_020697,NM_012282,NM_012281,NM_012284,NM_012283,NM_012285,NM_020689,NM_020677,NM_012…	true	-0.110238	0.00159822
anterograde axon cargo transport(GO:0008089)	24	48	NM_012437,NM_001271667,NM_207012,NM_012388,NM_012310,NM_000454,NM_201280,NM_006803,NM_015074,NM_018366,NM_032623,NM_005829,NM_183416,NM_212550,NM_177977,NM_003664,NM_001001342,NM_001261826,NM_001244008,NM_001199323,NM_003119,NM_183040,NM_004644,NM_001284	true	-0.283132	0.00159907
regulation of receptor activity(GO:0010469)	85	191	NM_004210,NM_007262,NM_144949,NM_001204303,NM_004318,NM_018092,NM_013372,NM_014932,NM_003029,NM_020972,NM_174936,NM_006078,NM_006044,NM_012116,NM_020795,ENST00000008876,NM_012324,NM_001109763,NM_000021,NM_005045,NM_199421,NM_006539,NM_006540,NM_133263,NM_018977,NM_018948,NM_000259,NM_181659,NM_000297,NM_001035235,NM_006254,NM_005481,NM_001008504,NM_001270989,NM_000447,NM_000484,NM_005400,NM_00690…	true	-0.164016	0.00159994
developmental growth(GO:0048589)	288	545	NM_007283,NM_007284,NM_014683,NM_018014,NM_018012,NM_001271938,NM_012432,NM_052857,NM_004263,NM_004274,NM_004326,NM_004329,NM_001204303,NM_007112,NM_007155,NM_018136,NM_001080395,NM_019884,NM_013366,NM_004097,NM_019851,NM_007329,NM_004114,NM_007313,NM_003015,NM_003012,NM_003013,NM_020909,NM_003062,NM_003061,NM_001257206,NM_004148,NM_004186,NM_001271534,NM_006168,NM_020851,NM_001080453,NM_006080,N…	true	-0.0916562	0.00160895
regulation of vesicle fusion(GO:0031338)	16	32	NM_014802,NM_014832,NM_003037,NM_020783,NM_020665,NM_014178,NM_000700,NM_005639,NM_030907,NM_002866,NM_015163,NM_001626,NM_001002857,NM_002088,NM_003165,NM_032298	true	-0.330298	0.0016303
homocysteine metabolic process(GO:0050667)	8	35	NM_000071,NM_000255,NM_000754,NM_001713,NM_005957,NM_001902,NM_001875,NM_004413	true	-0.420457	0.00165535
response to arsenic-containing substance(GO:0046685)	16	46	NM_000097,NM_000314,NM_000375,NM_000392,NM_199054,NM_005729,NM_182491,NM_001498,NM_002938,NM_002896,NM_001356,NM_002133,NM_004832,NM_002546,NM_002615,NM_183239	true	0.210464	0.00165561
dorsal/ventral pattern formation(GO:0009953)	92	164	NM_173849,NM_012476,NM_004329,NM_004316,NM_013372,NM_004083,NM_003012,NM_001174146,NM_006168,NM_020693,NM_001278548,NM_001267609,NM_013945,NM_001204088,NM_000038,NM_000021,NM_133267,NM_000168,NM_022469,NM_000193,NM_022475,NM_021784,NM_005270,NM_005269,NM_021728,NM_001003652,NM_006261,NM_021627,NM_170695,NM_016277,NM_000447,NM_005454,NM_005450,NM_005413,NM_019074,NM_001029865,NM_030753,NM_006735,N…	true	-0.157645	0.00165595
regulation of tyrosine phosphorylation of Stat3 protein(GO:0042516)	34	84	NM_144701,NM_021803,NM_001010926,NM_000142,NM_000163,NM_000222,NM_000230,NM_005211,NM_018724,NM_181832,NM_181831,NM_000515,NM_014225,NM_000565,NM_000600,NM_000605,NM_000614,NM_013246,NM_001190981,NM_052962,NM_005524,NM_016584,NM_001093772,NM_002828,NM_002715,NM_080423,NM_002184,NM_002187,NM_181310,NM_004972,NM_003745,NM_004750,NM_002309,NM_002202	true	0.178265	0.00170346
fibroblast migration(GO:0010761)	27	56	NM_004333,NM_007353,NM_021995,NM_001130924,NM_006007,NM_022648,NM_001017368,NM_005246,NM_001164741,NM_022334,NM_005400,NM_000660,ENST00000360635,NM_001523,NM_001014795,NM_001014796,NM_001978,NM_182914,NM_015910,NM_024841,NM_033158,NM_003901,NM_004874,NM_003246,NM_004763,NM_032199,ENST00000367922	true	-0.268785	0.00170592
positive regulation of T cell migration(GO:2000406)	19	42	NM_006419,NM_000609,NM_013258,NM_199168,NM_002995,NM_002989,NM_002963,NM_001565,NM_001123041,NM_003824,NM_003820,NM_178518,NM_001123396,NM_003183,NM_001033886,NM_004591,NM_001110,NM_001109,NM_003392	true	0.202903	0.0017554
regulation of macroautophagy(GO:0016241)	29	71	NM_014991,NM_020773,NM_020775,NM_012238,NM_020375,NM_000271,NM_006395,NM_014169,NM_001025300,NM_000546,NM_021020,NM_006913,NM_030981,NM_032547,NM_016628,NM_015315,NM_001126118,NM_031296,NM_001042432,NM_003565,NM_003900,NM_004958,NM_003766,NM_002572,NM_213590,NM_003169,NM_004637,NM_178564,NM_175605	true	-0.260487	0.00175756
DNA recombinase assembly(GO:0000730)	5	18	NM_134424,NM_002947,NM_002946,NM_002945,NM_002875	true	0.254539	0.00177785
double-strand break repair via synthesis-dependent strand annealing(GO:0045003)	5	18	NM_134424,NM_002947,NM_002946,NM_002945,NM_002875	true	0.254539	0.00177785
positive regulation of actin filament bundle assembly(GO:0032233)	50	89	NM_014629,NM_014634,NM_007286,NM_004333,NM_007127,NM_014906,NM_173728,NM_003012,NM_006105,NM_001113490,NM_000039,NM_005022,NM_018890,NM_133265,NM_000934,ENST00000395358,ENST00000394243,NM_000261,NM_005232,NM_000366,NM_017640,NM_022334,NM_181832,NM_181831,NM_030761,NM_013241,NM_016337,ENST00000360635,NM_005775,NM_032551,NM_002999,NM_001282971,NM_002966,NM_005902,NM_001018004,NM_001018005,NM_001166…	true	-0.206364	0.00179008
regulation of peptide secretion(GO:0002791)	189	425	NM_004291,NM_004322,NM_007117,NM_014752,NM_001267843,NM_014807,NM_001205293,NM_207578,NM_004041,ENST00000276198,NM_004123,NM_003012,NM_174889,NM_014980,NM_001178065,NM_007375,NM_003081,NM_004157,NM_001005291,NM_021928,NM_021995,NM_021969,NM_006168,NM_006105,NM_001039966,NM_021871,NM_173560,NM_024959,NM_007023,NM_001030273,NM_001256627,NM_012283,NM_020665,NM_012240,NM_207042,NM_012215,NM_207168,NM…	true	-0.111248	0.00180098
antigen processing and presentation of exogenous peptide antigen(GO:0002478)	170	578	NM_007234,NM_014614,NM_001030007,NM_004343,NM_018144,NM_007096,NM_014814,NM_013336,NM_001256270,NM_004068,NM_004048,NM_004082,NM_004079,NM_007317,NM_004106,NM_001242524,NM_003026,NM_014970,NM_001037494,NM_004159,NM_175932,NM_021982,NM_021983,NM_006120,NM_006141,NM_001080463,NM_001242758,NM_001005360,NM_001242837,NM_001033503,NM_001163942,NM_001243952,NM_001243962,NM_001163993,NM_172208,NM_012305,…	true	-0.116991	0.00181308
regulation of centrosome cycle(GO:0046605)	22	66	NM_001100119,NM_001114121,NM_007300,NM_014984,NM_144718,NM_001005207,NM_001037738,NM_012124,NM_170724,NM_018451,NM_014264,NM_018249,NM_006622,NM_015294,NM_001761,NM_138694,NM_182625,NM_004850,NM_002520,NM_002497,NM_153704,NM_003400	true	0.196385	0.00183443
cardiac septum morphogenesis(GO:0060411)	44	83	NM_012082,NM_006079,NM_021818,NM_012259,NM_000965,NM_000192,NM_020335,NM_005257,NM_017617,NM_133330,NM_022970,NM_018222,NM_005631,NM_022768,NM_005524,NM_014571,NM_080647,NM_080646,NM_001466,NM_016569,NM_005994,NM_022051,NM_001166220,NM_002763,NM_001166175,NM_001554,NM_024408,ENST00000359354,NM_033163,NM_002052,NM_003505,NM_004821,NM_001040708,NM_002449,NM_003108,NM_003107,NM_004626,NM_175605,NM_0…	true	-0.217428	0.00186854
regulation of mesonephros development(GO:0061217)	22	56	NM_001005333,NM_000029,NM_017420,NM_006317,NM_001002295,NM_000346,NM_001190468,NM_000514,NM_018490,NM_005450,NM_000660,NM_000686,NM_005631,NM_014587,NM_005982,NM_024426,NM_003990,NM_016932,NM_001202,NM_002353,NM_003466,NM_004502	true	-0.289428	0.00188749
regulation of branching involved in ureteric bud morphogenesis(GO:0090189)	19	49	NM_001005333,NM_000029,NM_017420,NM_000346,NM_001190468,NM_000514,NM_018490,NM_005450,NM_000660,NM_000686,NM_005631,NM_014587,NM_005982,NM_003990,NM_016932,NM_001202,NM_002353,NM_003466,NM_004502	true	-0.305829	0.00193349
vesicle targeting, to, from or within Golgi(GO:0048199)	27	73	NM_013388,NM_014866,NM_004193,NM_021982,NM_001033503,NM_199444,NM_006323,NM_006364,NM_017510,NM_021633,NM_001024227,NM_006827,NM_018569,NM_006815,NM_016057,NM_016128,NM_001098398,NM_001655,NM_016451,NM_001077207,NM_017983,NM_033127,NM_001252231,NM_003590,NM_004922,NM_004766,NM_183352	true	-0.26618	0.00193591
positive regulation of cAMP-mediated signaling(GO:0043950)	13	34	NM_004123,NM_000960,NM_000233,NM_001008504,NM_005409,NM_014247,NM_000684,NM_001142797,NM_001504,NM_001565,NM_001077489,NM_002619,NM_002416	true	0.217252	0.00195988
endocardial cushion morphogenesis(GO:0003203)	17	28	NM_004329,NM_003068,NM_000118,NM_017617,NM_000346,NM_000474,NM_005359,NM_014571,NM_203284,NM_005994,NM_001166220,NM_033163,NM_001040708,NM_002448,NM_002449,NM_001200,NM_002202	true	-0.31871	0.00196065
positive regulation of alkaline phosphatase activity(GO:0010694)	5	12	NM_133263,NM_001503,NM_005902,NM_002397,NM_002203	true	-0.483659	0.00197585
regulation of T cell migration(GO:2000404)	21	46	NM_006419,NM_000609,NM_006871,NM_013258,NM_199168,NM_002995,NM_002989,NM_002963,NM_001647,NM_001565,NM_001123041,NM_003824,NM_003820,NM_178518,NM_001123396,NM_003183,NM_001033886,NM_004591,NM_001110,NM_001109,NM_003392	true	0.197625	0.00198154
extracellular matrix disassembly(GO:0022617)	126	331	NM_012464,NM_012465,NM_004346,NM_004360,NM_147780,NM_057165,ENST00000471755,NM_004369,NM_004370,NM_004079,NM_013993,NM_173465,NM_001163771,NM_007038,NM_172168,NM_207191,NM_207197,NM_001017995,NM_005099,NM_182983,NM_000021,NM_000014,NM_005046,NM_000089,NM_000088,NM_000090,NM_000091,NM_000092,NM_000093,NM_000094,NM_018891,NM_000118,NM_000138,NM_198427,NM_133507,ENST00000394157,NM_022342,NM_005202,N…	true	-0.133834	0.00198687
signal release(GO:0023061)	345	777	NM_004218,NM_007269,NM_001030005,NM_012437,NM_004291,NM_004333,NM_001243812,NM_004322,NM_014747,NM_007117,NM_014752,NM_001267843,NM_014807,NM_001205293,NM_207578,NM_014932,NM_014905,NM_014904,NM_004041,ENST00000276198,NM_004075,NM_013445,NM_004122,NM_004123,NM_003020,NM_003012,NM_174889,NM_014980,NM_014989,NM_001178065,NM_007375,NM_003087,NM_003081,NM_003058,NM_003055,NM_003054,NM_003044,NM_00304…	true	-0.0822716	0.00199469
cellular biogenic amine catabolic process(GO:0042402)	19	50	NM_175839,NM_004059,NM_013406,NM_001010982,NM_012205,NM_207128,NM_207127,NM_133491,NM_016228,NM_001008661,NM_005651,NM_138326,NM_002970,NM_194294,NM_001145526,NM_152911,NM_002164,NM_003679,NM_001032998	true	0.201718	0.00199745
regulation of cell-substrate adhesion(GO:0010810)	146	311	NM_173828,NM_014634,NM_012431,NM_012425,NM_004333,NM_004343,NM_007124,NM_001033047,NM_013427,NM_003012,NM_020909,NM_004148,NM_044472,NM_020820,NM_012090,NM_006125,NM_021871,NM_012193,NM_001039802,NM_007046,NM_001004019,NM_207191,NM_207197,NM_001010887,NM_172212,NM_172210,NM_000039,NM_000020,NM_000077,NM_005052,NM_000088,NM_018890,NM_199511,NM_000267,NM_000261,NM_006384,NM_005233,NM_005232,NM_0003…	true	-0.124681	0.00200343
regulation of mitochondrial depolarization(GO:0051900)	13	23	NM_006098,NM_012215,NM_000261,NM_000633,NM_006818,NM_000697,NM_000729,NM_022873,AF307332,NM_001498,NM_198578,NM_017917,NM_002061	true	0.216846	0.00204877
regulation of stress fiber assembly(GO:0051492)	63	117	NM_014629,NM_014634,NM_007286,NM_004333,NM_014906,NM_173728,NM_013427,NM_003012,NM_006105,NM_006125,NM_001135190,NM_001113490,NM_000039,NM_005022,NM_018890,NM_133265,NM_000958,NM_000934,ENST00000395358,ENST00000394243,NM_000261,NM_005232,NM_000366,NM_000368,NM_017640,NM_022334,NM_181832,NM_181831,NM_005406,NM_030761,NM_013241,NM_016337,ENST00000360635,NM_001143778,NM_005775,NM_032551,NM_002999,NM…	true	-0.184025	0.002051
protein demethylation(GO:0006482)	35	83	NM_014663,NM_018039,NM_007125,ENST00000377803,NM_004187,NM_021968,NM_001080424,NM_001005366,ENST00000381306,NM_012308,AB031230,NM_001034077,NM_017621,NM_018433,NM_005392,NM_016147,NM_015061,NM_015013,NM_006618,ENST00000382893,NM_032590,NM_015107,NM_015167,NM_030647,NM_001184898,NM_182660,NM_003540,NM_003543,NM_003542,NM_003547,NM_175054,NM_004653,NM_001145348,NM_003337,NM_001146702	true	0.175228	0.00205458
protein dealkylation(GO:0008214)	35	83	NM_014663,NM_018039,NM_007125,ENST00000377803,NM_004187,NM_021968,NM_001080424,NM_001005366,ENST00000381306,NM_012308,AB031230,NM_001034077,NM_017621,NM_018433,NM_005392,NM_016147,NM_015061,NM_015013,NM_006618,ENST00000382893,NM_032590,NM_015107,NM_015167,NM_030647,NM_001184898,NM_182660,NM_003540,NM_003543,NM_003542,NM_003547,NM_175054,NM_004653,NM_001145348,NM_003337,NM_001146702	true	0.175228	0.00205458
negative regulation of epithelial cell proliferation(GO:0050680)	97	205	NM_018010,NM_012461,NM_004360,NM_014751,NM_007178,NM_004093,NM_014909,NM_004064,NM_004087,NM_003012,NM_003013,NM_003068,NM_020800,NM_006167,NM_006142,NM_001005333,NM_021818,NM_001017967,NM_000042,NM_182983,NM_000038,NM_020427,NM_000020,NM_000076,NM_000044,NM_000059,NM_000118,NM_000165,NM_000267,NM_001164617,NM_001079675,NM_000314,NM_000379,NM_000321,NM_001002295,NM_000346,NM_001017535,NM_018402,N…	true	-0.150809	0.00206756
glycerol catabolic process(GO:0019563)	5	13	NM_000167,NM_033214,NM_001039547,NM_001083112,NM_001205019	true	0.253012	0.00210391
positive regulation of transcription from RNA polymerase II promoter involved in heart development(GO:1901228)	6	12	NM_013372,NM_001191323,NM_001146312,NM_153604,NM_003181,NM_003131	true	-0.454771	0.00210445
positive regulation of transcription from RNA polymerase II promoter involved in myocardial precursor cell differentiation(GO:0003257)	6	8	NM_013372,NM_001191323,NM_001146312,NM_153604,NM_003181,NM_003131	true	-0.454771	0.00210445
response to carbohydrate(GO:0009743)	147	248	NM_004218,NM_004322,NM_007117,NM_014807,NM_001135585,NM_014904,NM_004041,NM_004064,NM_007345,NM_013402,NM_004123,NM_003018,NM_174889,NM_001178065,NM_003039,NM_003042,NM_001244710,NM_001005291,NM_021969,NM_021957,NM_006168,NM_001039966,NM_024945,NM_001034116,NM_001256627,NM_020665,NM_207042,NM_001024847,NM_000040,NM_000963,NM_201589,NM_000944,NM_000101,NM_130386,NM_006424,NM_000162,NM_000164,NM_00…	true	-0.123411	0.00215926
long-chain fatty acid transport(GO:0015909)	42	110	ENST00000256969,NM_004102,NM_007366,NM_012254,NM_005094,NM_000098,NM_000928,NM_000929,NM_001017372,NM_020167,NM_000387,NM_006252,NM_005163,NM_001009185,NM_021077,NM_016203,NM_005399,NM_000789,NM_000795,NM_000797,NM_032551,NM_001443,NM_152246,NM_030572,NM_001626,NM_001995,NM_138711,NM_024420,NM_015723,NM_003645,NM_003561,NM_003560,NM_003749,NM_001001547,NM_001093,NM_003246,NM_001031847,NM_213600,N…	true	0.166576	0.00216032
glucocorticoid receptor signaling pathway(GO:0042921)	15	59	NM_004343,NM_001267843,NM_004075,NM_006015,NM_001030273,NM_198400,NM_006328,NM_018640,NM_014071,NM_001018077,NM_021117,NM_002634,NM_004898,NM_002616,NM_003405	true	-0.331488	0.00217083
amine catabolic process(GO:0009310)	21	53	NM_175839,NM_004059,NM_013406,NM_001010982,NM_012205,NM_207128,NM_207127,NM_133491,NM_016228,NM_001008661,NM_005651,NM_138326,NM_002970,NM_001684,NM_194294,NM_001145526,NM_152911,NM_002164,NM_003679,NM_001001396,NM_001032998	true	0.196742	0.00217804
positive regulation of phosphoprotein phosphatase activity(GO:0032516)	11	22	NM_007261,NM_004274,NM_012301,NM_005184,NM_006888,NM_000686,NM_001743,NM_178001,NM_004972,NM_181501,NM_002609	true	-0.370321	0.00220126
S-shaped body morphogenesis(GO:0072050)	7	18	NM_001010926,NM_000297,NM_005524,NM_024426,NM_002609,NM_001202,NM_003466	true	-0.431249	0.00221833
endodermal cell fate specification(GO:0001714)	7	22	NM_012242,NM_022454,NM_018670,NM_002701,NM_001946,NM_024865,NM_003106	true	0.239885	0.00223767
neurofilament cytoskeleton organization(GO:0060052)	6	10	NM_018941,NM_000454,NM_021076,NM_030808,NM_032727,NM_016529	true	-0.452959	0.00224219
translational elongation(GO:0006414)	118	357	NM_007209,NM_001030001,NM_012423,NM_007104,NM_001034996,M29548,NM_014912,NM_013417,NM_001242502,NM_001136134,NM_001136137,NM_001136136,NM_021937,ENST00000401695,NM_024996,NM_001024921,NM_013989,NM_005061,NM_000987,NM_000988,NM_000989,NM_000980,NM_000981,NM_000982,NM_000983,NM_000984,NM_000985,NM_000986,NM_000998,NM_000992,NM_000993,NM_000990,NM_000991,NM_000996,NM_000997,NM_000969,NM_000967,NM_00…	true	0.118905	0.0022422
embryonic skeletal joint morphogenesis(GO:0060272)	10	21	NM_003030,NM_005450,NM_001098210,NM_021192,NM_005523,NM_001904,NM_001844,NM_053001,NM_145260,NM_001202	true	-0.381992	0.00227124
negative regulation of lymphocyte activation(GO:0051250)	88	198	NM_004232,NM_007261,NM_007268,NM_012452,NM_052891,NM_052890,NM_004346,NM_144949,NM_004090,NM_004087,NM_004119,NM_003019,NM_003012,NM_144717,NM_173799,NM_021913,NM_021958,NM_012179,NM_001030288,NM_012265,NM_020651,NM_172140,NM_001024736,NM_005091,NM_000043,NM_000051,NM_000168,NM_000193,NM_020393,NM_000215,NM_005214,NM_014009,NM_000311,NM_001004354,NM_006290,NM_006293,NM_181780,NM_005131,NM_014143,…	true	-0.156391	0.0022807
negative regulation of protein modification process(GO:0031400)	407	1052	NM_019619,NM_004238,NM_007207,NM_007236,NM_014634,NM_007262,NM_007261,NM_007271,NM_012461,NM_012479,NM_004346,NM_004324,NM_004323,NM_144949,NM_004313,NM_001114091,NM_007199,NM_007178,NM_014814,NM_175850,NM_001278160,NM_014885,NM_013372,NM_013366,NM_013367,NM_078626,NM_004090,NM_014906,NM_004041,NM_004064,NM_004075,ENST00000394884,NM_007358,NM_007300,NM_007308,NM_007313,NM_004124,NM_003015,NM_0030…	true	-0.0748348	0.00230567
actin filament-based movement(GO:0030048)	71	185	NM_019619,NM_001256012,NM_001037341,NM_001278344,NM_007127,NM_001099404,NM_020909,NM_003047,NM_004145,NM_079420,NM_012223,NM_001024948,NM_017533,NM_017534,NM_000256,NM_000258,NM_000257,NM_000259,NM_000260,NM_198056,NM_000366,NM_000364,NM_000363,NM_000377,NM_000335,NM_005159,NM_000432,NM_133379,NM_133378,NM_005406,NM_001164507,NM_000684,NM_206819,NM_000702,NM_018222,NM_000891,NM_152263,NM_015180,N…	true	-0.172171	0.00235369
ear morphogenesis(GO:0042471)	100	170	NM_173849,NM_018013,NM_004327,NM_021962,NM_006161,NM_001032280,NM_001080508,NM_020402,NM_182983,NM_018890,NM_017420,NM_017412,NM_020335,NM_000260,NM_000263,NM_021728,NM_005247,NM_005221,NM_133433,NM_000307,NM_017581,NM_001002295,NM_000346,NM_198174,NM_005172,NM_147196,NM_005461,NM_016239,NM_000474,NM_000454,NM_000503,NM_005450,NM_014246,NM_005430,NM_201280,NM_022970,NM_016307,NM_000693,NM_006735,…	true	-0.14651	0.00242371
regulation of DNA-dependent DNA replication(GO:0090329)	31	75	NM_013442,NM_000057,NM_130395,NM_017489,NM_006306,NM_017553,NM_021627,NM_000489,NM_021073,NM_005445,NM_030768,NM_005652,NM_005590,NM_021241,NM_030928,NM_152259,NM_001281463,NM_001718,NM_203394,NM_017858,NM_001798,NM_024680,NM_017933,NM_003503,NM_033632,NM_004793,NM_002485,NM_032143,NM_001202,NM_001261,NM_145663	true	0.178975	0.00243081
glycosylation(GO:0070085)	273	766	NM_007210,NM_007236,NM_007255,NM_014674,NM_012461,NM_052859,NM_001034845,NM_004343,NM_004314,NM_144988,NM_007126,NM_007171,NM_001243766,NM_173601,NM_001080393,NM_013338,NM_013339,NM_013335,NM_173654,NM_013382,NM_013388,NM_001101426,NM_014908,NM_007357,NM_013443,NM_003033,NM_003034,NM_144677,NM_001243564,NM_001244710,NM_001004127,NM_021996,NM_021982,NM_021971,NM_006122,NM_174914,NM_006100,NM_17496…	true	-0.0903658	0.00246036
RNA modification(GO:0009451)	87	293	NM_019606,NM_018146,NM_173659,NM_013393,NM_019852,NM_144709,NM_020810,NM_001080432,NM_021822,NM_001286259,NM_018983,ENST00000388822,NM_022353,NM_022366,NM_018648,NM_020175,NM_181708,NM_019042,NM_138933,NM_017647,NM_181725,NM_014168,NM_005371,NM_133644,NM_199044,NM_016020,NM_006789,NM_005646,NM_014484,NM_014473,NM_016173,NM_015050,NM_018396,NM_022727,NM_018348,NM_030934,NM_001265582,NM_138386,NM_0…	true	0.131825	0.00246929
actin filament bundle assembly(GO:0051017)	108	248	NM_014629,NM_014634,NM_007286,NM_004333,NM_007127,NM_001034954,NM_014906,NM_004041,NM_173728,NM_013427,NM_007314,NM_003012,NM_003088,NM_006105,NM_006125,NM_001278939,NM_001135190,NM_012223,NM_012418,ENST00000379350,NM_001113490,NM_182966,NM_000039,NM_020441,NM_005022,NM_018890,NM_133265,NM_000958,NM_000934,ENST00000395358,ENST00000394243,NM_006403,NM_017451,NM_017488,NM_017482,NM_000261,NM_005232…	true	-0.141043	0.00247238
actin filament bundle organization(GO:0061572)	108	248	NM_014629,NM_014634,NM_007286,NM_004333,NM_007127,NM_001034954,NM_014906,NM_004041,NM_173728,NM_013427,NM_007314,NM_003012,NM_003088,NM_006105,NM_006125,NM_001278939,NM_001135190,NM_012223,NM_012418,ENST00000379350,NM_001113490,NM_182966,NM_000039,NM_020441,NM_005022,NM_018890,NM_133265,NM_000958,NM_000934,ENST00000395358,ENST00000394243,NM_006403,NM_017451,NM_017488,NM_017482,NM_000261,NM_005232…	true	-0.141043	0.00247238
negative regulation of macrophage derived foam cell differentiation(GO:0010745)	13	36	NM_007121,NM_207627,NM_020529,NM_000078,NM_005036,NM_000212,NM_018672,NM_000567,NM_005693,NM_005502,NM_138711,NM_004797,NM_002210	true	0.215061	0.00248182
regulation of neuron projection development(GO:0010975)	246	589	NM_004210,NM_173808,NM_018084,NM_007283,NM_007284,NM_014683,NM_018014,NM_001271938,NM_012437,NM_012428,NM_004263,NM_004309,NM_014780,NM_057159,NM_014809,NM_001080395,NM_013366,NM_014845,NM_014932,NM_014912,NM_019850,NM_004114,NM_007314,NM_020929,NM_003030,NM_001037442,NM_020975,NM_003061,NM_001011515,NM_020999,NM_004186,NM_001271534,NM_020820,NM_021914,NM_006168,NM_006180,NM_020851,NM_001256429,N…	true	-0.0949798	0.00248193
glomerular epithelial cell development(GO:0072310)	9	15	NM_014625,NM_012301,NM_001454,NM_003870,NM_004998,NM_004797,NM_004646,NM_001202,NM_002292	true	-0.3936	0.00248646
energy reserve metabolic process(GO:0006112)	174	483	NM_180976,NM_052847,NM_014805,NM_001034954,NM_001205293,NM_019884,NM_207578,NM_004036,NM_004104,NM_003081,NM_004157,NM_004130,NM_004126,NM_001244710,NM_021957,NM_006105,NM_007023,NM_012283,NM_012202,NM_001017998,NM_020546,NM_000028,NM_000025,NM_018841,NM_006516,NM_199460,NM_006482,ENST00000395358,NM_017431,NM_000152,NM_000151,NM_000162,NM_000160,NM_000158,NM_018955,NM_018960,NM_006411,NM_00125845…	true	-0.112199	0.00250917
response to bacterium(GO:0009617)	368	745	NM_173847,NM_007207,NM_014633,NM_018064,NM_007275,NM_001037341,NM_001011878,NM_012448,NM_052813,NM_052891,NM_052890,NM_004271,NM_004345,NM_004327,NM_001081551,NM_007127,NM_007199,NM_001206491,NM_001037500,NM_001033018,NM_001033017,NM_207469,NM_001033053,NM_004048,NM_004086,NM_144701,NM_007329,NM_004106,NM_007308,NM_007313,NM_004120,NM_003019,NM_003018,NM_001174104,NM_003005,NM_001037499,NM_001037…	true	0.0731342	0.00254681
megakaryocyte development(GO:0035855)	12	17	NM_005028,NM_000222,NM_005470,NM_015175,NM_001093772,NM_002834,NM_002017,NM_004774,NM_003189,NM_003131,NM_002398,NM_153813	true	-0.355253	0.00256116
response to nitrosative stress(GO:0051409)	9	14	NM_000671,NM_000849,NM_000848,NM_022746,NM_001498,NM_001946,NM_017898,NM_146421,NM_002061	true	0.228875	0.00262157
mature B cell differentiation involved in immune response(GO:0002313)	7	12	NM_000022,NM_005178,NM_018463,NM_173174,NM_004951,NM_145285,NM_002305	true	-0.426492	0.00262668
positive regulation of endothelial cell migration(GO:0010595)	55	139	NM_014707,NM_001113490,NM_000029,NM_000963,NM_133265,NM_001024629,NM_000245,NM_006384,NM_000212,NM_005251,NM_005238,NM_133459,NM_001002295,NM_005139,NM_005163,NM_022334,NM_017679,NM_130847,NM_000459,NM_016202,NM_000660,NM_013232,ENST00000360635,NM_000697,NM_005505,NM_014567,NM_001503,NM_015278,NM_032777,NM_015401,NM_002763,NM_002742,NM_016457,NM_002737,NM_001540,NM_001955,NM_003966,NM_173174,NM_0…	true	-0.191205	0.0026462
regulation of glucose import(GO:0046324)	51	121	NM_004277,NM_001034954,NM_019884,NM_004171,NM_012096,NM_012249,NM_012215,NM_000189,NM_001164617,NM_000208,NM_000207,NM_000315,NM_006208,NM_017625,NM_005163,NM_198184,NM_005117,NM_016203,NM_018445,NM_000594,NM_000618,NM_019113,NM_005304,NM_001272043,NM_005619,NM_006628,NM_005544,NM_018368,AF307332,NM_031908,NM_023083,NM_023085,NM_002889,NM_001310,NM_002834,NM_002744,NM_002740,NM_016459,NM_001626,N…	true	-0.197728	0.00264951
negative regulation of cell activation(GO:0050866)	109	262	NM_004232,NM_007261,NM_007268,NM_012452,NM_052891,NM_052890,NM_004346,NM_004327,NM_144949,NM_004090,NM_004087,NM_004119,NM_003019,NM_003012,NM_144717,NM_173799,NM_021913,NM_021962,NM_021958,NM_001039966,NM_012179,NM_001030288,NM_012265,NM_020651,NM_172140,NM_001024736,NM_005091,NM_000043,NM_000051,NM_000168,NM_000193,NM_020393,NM_000215,NM_005246,NM_005214,NM_014009,NM_000311,NM_001004354,NM_0062…	true	-0.139383	0.00267414
mitotic sister chromatid cohesion(GO:0007064)	15	26	NM_001100399,NM_173685,NM_001100400,NM_006306,NM_133433,NM_000321,NM_005445,NM_015032,NM_080668,NM_024094,NM_015110,NM_015100,NM_031965,NM_001281463,NM_025146	true	0.20854	0.00269853
positive regulation of stress fiber assembly(GO:0051496)	44	79	NM_014629,NM_014634,NM_004333,NM_014906,NM_173728,NM_003012,NM_006105,NM_001113490,NM_000039,NM_005022,NM_018890,NM_133265,NM_000934,ENST00000395358,NM_000261,NM_005232,NM_000366,NM_017640,NM_022334,NM_181832,NM_181831,NM_030761,NM_013241,NM_016337,ENST00000360635,NM_005775,NM_032551,NM_002999,NM_002966,NM_005902,NM_001018004,NM_001018005,NM_001664,NM_001901,NM_001173977,NM_053024,NM_003608,NM_00…	true	-0.210662	0.00269979
negative regulation of protein serine/threonine kinase activity(GO:0071901)	109	272	NM_007207,NM_007261,NM_007271,NM_012479,NM_004346,NM_007199,NM_078626,NM_004090,NM_004064,NM_007313,NM_003015,NM_003012,NM_003013,NM_004157,NM_004181,NM_006142,NM_012179,NM_012116,NM_012124,NM_012238,NM_001204186,NM_001270519,NM_000038,NM_000076,NM_000077,BC000737,NM_006480,ENST00000592695,NM_006460,NM_001005741,NM_000267,NM_020185,NM_000314,NM_006254,NM_005157,NM_001164761,NM_181784,NM_181795,NM…	true	-0.139203	0.00271036
opsonization(GO:0008228)	9	21	NM_004108,NM_004139,NM_000242,NM_000567,NM_001002029,NM_000715,NM_000716,NM_002852,NM_002003	true	0.228478	0.00273416
negative regulation of cell development(GO:0010721)	133	249	NM_007207,NM_018055,NM_014683,NM_018014,NM_004263,NM_004329,NM_004309,NM_007178,NM_001080395,NM_019884,NM_014868,NM_004114,NM_001037442,NM_003012,NM_003013,NM_003061,NM_003036,NM_001112704,NM_004186,NM_006197,NM_006168,NM_006080,NM_001206999,NM_012237,NM_001010926,NM_020532,NM_182983,NM_000021,NM_006519,NM_000192,ENST00000379123,NM_017514,NM_000267,NM_006341,NM_021784,NM_000280,NM_005226,NM_00521…	true	-0.126384	0.00277231
hepatocyte growth factor receptor signaling pathway(GO:0048012)	12	31	NM_007036,NM_001010931,NM_001010934,NM_012237,NM_001024629,NM_030955,NM_014567,NM_002827,NM_002828,NM_080423,NM_001170714,NM_003873	true	0.217167	0.00277451
protein localization to membrane(GO:0072657)	392	1056	NM_004218,NM_019619,NM_007214,NM_001204404,NM_007209,NM_007236,NM_014600,NM_014601,NM_018026,NM_001030001,NM_012460,NM_012456,NM_012423,NM_012479,NM_004360,NM_004324,NM_007104,NM_004322,NM_007111,NM_007107,NM_004317,NM_014752,NM_007183,NM_057174,NM_014802,NM_001034996,NM_001034954,NM_004383,NM_013336,NM_013337,NM_013330,NM_014932,NM_173660,NM_004068,NM_004087,NM_004106,NM_004114,NM_020922,NM_0209…	true	-0.0747817	0.00279149
neutrophil chemotaxis(GO:0030593)	59	103	NM_001037341,NM_004054,NM_004106,NM_004139,NM_020820,NM_006113,NM_001271749,NM_207032,NM_012398,NM_005026,NM_018890,NM_000928,NM_000211,NM_018643,NM_000331,NM_006274,NM_156039,ENST00000006053,NM_148910,NM_005428,NM_005337,NM_000576,NM_000584,NM_000619,NM_000632,NM_005621,NM_002995,NM_002989,NM_002982,NM_002965,NM_002964,NM_002872,NM_001338,NM_016584,NM_001736,NM_022162,NM_002737,NM_001025158,NM_0…	true	0.148411	0.00282375
membrane fusion(GO:0061025)	107	253	NM_007236,NM_012437,NM_004287,NM_004324,NM_014802,NM_014832,NM_001278464,NM_014874,NM_004034,NM_001278113,NM_004052,NM_013442,NM_014989,NM_001174044,NM_003037,NM_004177,NM_001257999,NM_012062,NM_006152,NM_006178,NM_006113,NM_001080483,ENST00000310421,NM_012198,NM_012108,NM_020771,NM_020783,NM_020665,NM_020641,NM_012388,NM_013978,NM_006496,NM_017516,NM_006370,NM_006373,NM_006395,NM_018668,NM_01417…	true	-0.139803	0.00283711
cranial suture morphogenesis(GO:0060363)	10	10	NM_000168,NM_000474,NM_022970,NM_000660,NM_016133,NM_005542,NM_002007,NM_003239,NM_002449,NM_001202	true	-0.375969	0.00284882
mRNA 5'-splice site recognition(GO:0000395)	5	10	NM_003093,NM_021144,NM_080743,NM_001078166,NM_033222	true	0.250155	0.00285835
kidney epithelium development(GO:0072073)	121	250	NM_014625,NM_018012,NM_014751,NM_001033047,NM_004087,NM_003012,NM_020975,NM_004158,NM_001257206,NM_004143,NM_020856,NM_001005333,NM_001010926,NM_012301,NM_000029,NM_000019,NM_000965,NM_006522,NM_017420,NM_017415,NM_000168,NM_000193,NM_006317,NM_001164617,NM_020248,NM_005251,NM_000296,NM_198098,NM_014079,NM_000297,NM_133468,NM_017651,NM_017617,NM_001002295,NM_006236,NM_000346,NM_001190468,NM_00100…	true	-0.13179	0.00286161
extracellular matrix-cell signaling(GO:0035426)	5	7	NM_012193,NM_000266,NM_005246,NM_021229,NM_002335	true	-0.472309	0.00288023
Fc-gamma receptor signaling pathway involved in phagocytosis(GO:0038096)	75	233	NM_001178126,NM_001030059,NM_007355,NM_007313,NM_044472,NM_001080529,NM_006153,NM_006113,NM_001005386,NM_001039802,NM_001278556,NM_001017963,NM_012334,NM_000073,NM_005027,NM_018890,NM_133264,NM_006409,NM_017451,NM_001270439,NM_017534,ENST00000492167,NM_198053,NM_000377,NM_006218,NM_006219,NM_001004426,NM_006254,NM_005157,NM_021642,NM_138957,ENST00000390243,ENST00000390244,NM_005470,ENST0000039023…	true	-0.164757	0.00288248
Fc-gamma receptor signaling pathway(GO:0038094)	75	233	NM_001178126,NM_001030059,NM_007355,NM_007313,NM_044472,NM_001080529,NM_006153,NM_006113,NM_001005386,NM_001039802,NM_001278556,NM_001017963,NM_012334,NM_000073,NM_005027,NM_018890,NM_133264,NM_006409,NM_017451,NM_001270439,NM_017534,ENST00000492167,NM_198053,NM_000377,NM_006218,NM_006219,NM_001004426,NM_006254,NM_005157,NM_021642,NM_138957,ENST00000390243,ENST00000390244,NM_005470,ENST0000039023…	true	-0.164757	0.00288248
immune response-regulating cell surface receptor signaling pathway involved in phagocytosis(GO:0002433)	75	233	NM_001178126,NM_001030059,NM_007355,NM_007313,NM_044472,NM_001080529,NM_006153,NM_006113,NM_001005386,NM_001039802,NM_001278556,NM_001017963,NM_012334,NM_000073,NM_005027,NM_018890,NM_133264,NM_006409,NM_017451,NM_001270439,NM_017534,ENST00000492167,NM_198053,NM_000377,NM_006218,NM_006219,NM_001004426,NM_006254,NM_005157,NM_021642,NM_138957,ENST00000390243,ENST00000390244,NM_005470,ENST0000039023…	true	-0.164757	0.00288248
lateral sprouting from an epithelium(GO:0060601)	12	26	NM_000044,NM_000193,NM_020335,NM_005450,NM_014246,NM_022970,NM_015170,ENST00000359354,NM_003722,NM_001202,NM_003392,NM_004465	true	-0.352015	0.00290139
visual learning(GO:0008542)	45	67	NM_001030013,NM_004333,NM_001204303,NM_001256214,NM_007327,NM_007314,NM_021920,NM_021932,NM_012182,NM_000924,NM_199460,NM_006480,NM_001185091,NM_000267,NM_000222,NM_000332,NM_138999,NM_138966,NM_133376,NM_000484,NM_005343,NM_016356,NM_021008,NM_000679,NM_000787,NM_000794,NM_000795,NM_000748,NM_006772,NM_000702,NM_000859,NM_000833,NM_001093772,NM_002111,NM_001042492,NM_004935,NM_003719,NM_00112982…	true	-0.207223	0.00290567
cellular response to carbohydrate stimulus(GO:0071322)	83	141	NM_004218,NM_004322,NM_014807,NM_001135585,NM_014904,NM_004041,NM_007345,NM_174889,NM_001178065,NM_003039,NM_001039966,NM_001256627,NM_020665,NM_000040,NM_000944,NM_000101,NM_130386,NM_021784,NM_000230,NM_000201,NM_021724,NM_023928,NM_000349,NM_014172,NM_000436,NM_016275,NM_054033,NM_000525,NM_005400,NM_005391,NM_000681,NM_030756,NM_000780,NM_000756,NM_199292,NM_021132,NM_000859,NM_000820,NM_0057…	true	-0.15708	0.00290804
regulation of transcription from RNA polymerase II promoter involved in myocardial precursor cell differentiation(GO:0003256)	9	17	NM_013372,NM_017617,NM_203284,NM_005994,NM_001191323,NM_001146312,NM_153604,NM_003181,NM_003131	true	-0.38913	0.00292833
regulation of peptide transport(GO:0090087)	191	431	NM_004291,NM_004322,NM_007117,NM_014752,NM_001267843,NM_014807,NM_001205293,NM_207578,NM_004041,ENST00000276198,NM_004123,NM_003012,NM_174889,NM_014980,NM_001178065,NM_007375,NM_003081,NM_004157,NM_001005291,NM_021928,NM_021995,NM_021969,NM_006168,NM_006105,NM_001039966,NM_021871,NM_173560,NM_024959,NM_007023,NM_001030273,NM_001256627,NM_012283,NM_020665,NM_012240,NM_207042,NM_012215,NM_207168,NM…	true	-0.105566	0.0029476
apical protein localization(GO:0045176)	12	16	NM_020859,NM_001260492,NM_020335,NM_020399,AK127929,NM_021072,NM_014246,NM_001649,NM_205842,NM_003827,NM_004747,NM_002371	true	-0.351503	0.0029585
protein glycosylation(GO:0006486)	252	701	NM_007210,NM_007236,NM_007255,NM_014674,NM_012461,NM_052859,NM_001034845,NM_004343,NM_004314,NM_144988,NM_007126,NM_007171,NM_001243766,NM_173601,NM_001080393,NM_013338,NM_013339,NM_013335,NM_173654,NM_013382,NM_013388,NM_001101426,NM_014908,NM_007357,NM_013443,NM_003033,NM_003034,NM_144677,NM_001243564,NM_001244710,NM_001004127,NM_021996,NM_021982,NM_021971,NM_006122,NM_006100,NM_174963,NM_02180…	true	-0.0922391	0.00295865
macromolecule glycosylation(GO:0043413)	252	701	NM_007210,NM_007236,NM_007255,NM_014674,NM_012461,NM_052859,NM_001034845,NM_004343,NM_004314,NM_144988,NM_007126,NM_007171,NM_001243766,NM_173601,NM_001080393,NM_013338,NM_013339,NM_013335,NM_173654,NM_013382,NM_013388,NM_001101426,NM_014908,NM_007357,NM_013443,NM_003033,NM_003034,NM_144677,NM_001243564,NM_001244710,NM_001004127,NM_021996,NM_021982,NM_021971,NM_006122,NM_006100,NM_174963,NM_02180…	true	-0.0922391	0.00295865
respiratory system development(GO:0060541)	182	325	NM_018055,NM_014660,NM_004364,NM_004329,NM_004316,NM_018189,NM_004390,NM_004095,NM_003019,NM_001137675,NM_003036,NM_001005291,NM_006185,NM_012082,NM_006116,NM_020856,NM_021818,NM_020733,NM_172037,ENST00000373670,NM_024915,NM_012391,NM_001024847,NM_005098,NM_005069,NM_000022,NM_000052,NM_198389,NM_000966,NM_017420,NM_000168,NM_001005743,NM_000193,NM_000192,NM_022475,NM_020335,NM_018948,NM_006408,N…	true	-0.107936	0.00298052
organophosphate ester transport(GO:0015748)	70	191	NM_014616,NM_001136493,NM_207627,NM_006095,NM_006045,NM_007001,NM_012243,NM_012417,NM_012399,NM_000040,NM_000039,NM_006553,NM_020453,NM_000078,NM_006432,NM_000151,NM_000165,NM_006416,NM_138813,NM_006358,NM_001005855,ENST00000389967,NM_181671,NM_022437,NM_006224,NM_000350,NM_006254,NM_001286520,NM_000482,NM_000483,NM_000527,NM_016399,NM_019112,NM_013237,NM_001007098,NM_001029885,NM_005603,NM_01824…	true	-0.169482	0.00298801
interleukin-10 secretion(GO:0072608)	6	19	NM_005242,NM_014143,NM_013258,NM_014452,NM_002744,NM_002124	true	0.242917	0.00299891
cartilage condensation(GO:0001502)	22	33	ENST00000471755,NM_020996,NM_001080461,NM_001190839,NM_000900,NM_000346,NM_020157,NM_001009944,NM_006982,NM_005378,NM_013227,NM_005593,NM_001901,NM_001844,NM_003658,NM_002007,NM_003250,NM_004625,NM_001203,NM_001267,NM_004560,NM_001199	true	-0.278995	0.00300471
myeloid leukocyte mediated immunity(GO:0002444)	49	105	NM_007261,NM_007269,NM_007275,NM_004327,NM_004106,NM_004155,NM_021962,NM_012296,NM_020683,NM_012335,NM_182931,NM_000081,NM_000064,NM_005026,NM_000928,NM_000139,NM_000265,NM_000222,NM_005242,NM_018643,NM_005139,NM_001024210,NM_018425,NM_000565,NM_000600,NM_000676,NM_014387,NM_199242,NM_005638,NM_006650,NM_005739,NM_001093772,NM_002649,NM_001911,ENST00000398475,NM_015715,NM_001042747,NM_002133,NM_0…	true	0.15622	0.00303282
protein localization to cell surface(GO:0034394)	37	77	NM_004218,NM_014604,NM_001278344,NM_004360,NM_020429,NM_000113,NM_017526,NM_006329,NM_014000,NM_000594,NM_001098210,NM_018373,NM_005704,NM_001456,NM_015141,NM_015154,NM_153271,NM_002844,NM_015470,NM_001663,NM_016492,NM_001904,NM_001963,NM_001144967,NM_138409,NM_173076,NM_002009,NM_001110556,NM_004626,NM_001234,NM_178817,NM_001148,NM_001146,NM_003363,NM_004465,NM_001001996,NM_001001995	true	-0.224656	0.00304413
maternal process involved in parturition(GO:0060137)	5	7	NM_018055,NM_000916,NM_002982,NM_001957,NM_001955	true	0.249531	0.00305155
response to topologically incorrect protein(GO:0035966)	147	350	NM_014685,NM_014607,NM_014613,NM_014674,NM_004287,NM_004324,NM_004343,NM_007126,NM_014760,NM_014780,NM_057161,NM_004381,NM_019884,NM_013388,NM_014874,NM_004094,ENST00000262455,NM_004082,NM_004083,NM_007348,NM_007355,NM_003029,NM_001244710,NM_021979,NM_006164,NM_006145,NM_006044,NM_006010,NM_006005,NM_007034,NM_012266,NM_001017963,NM_001135005,NM_012328,NM_172230,NM_005080,NM_000018,NM_020470,NM_0…	true	-0.119292	0.0030631
pituitary gland development(GO:0021983)	37	59	NM_004360,NM_004329,NM_005270,NM_005269,NM_014080,NM_006261,NM_005149,NM_134442,NM_000475,NM_021081,NM_005450,NM_005413,NM_030761,NM_030756,NM_005604,NM_000795,NM_005634,NM_005631,NM_000823,NM_005524,NM_014564,NM_002968,NM_153426,NM_002653,NM_033163,NM_002006,NM_001044,NM_032109,NM_002448,NM_003106,NM_001200,NM_001202,NM_001117,NM_002202,NM_145657,NM_003392,NM_004465	true	-0.224521	0.00306468
canonical Wnt signaling pathway(GO:0060070)	195	449	NM_014709,NM_004360,NM_004326,NM_018136,NM_007197,NM_019884,NM_013372,NM_001206885,NM_004083,NM_003015,NM_003014,NM_020920,NM_003012,NM_003013,NM_003068,NM_004162,NM_004185,NM_001005209,NM_012193,NM_001206998,NM_001080512,NM_001080508,NM_001256312,NM_001242811,ENST00000349937,NM_001030273,NM_024911,NM_001037954,NM_001038633,NM_012242,NM_012395,NM_012342,NM_001270519,NM_005067,NM_000038,NM_000021,…	true	-0.104034	0.00308409
positive regulation of lipid kinase activity(GO:0090218)	24	54	NM_004356,NM_004119,NM_006113,NM_020526,NM_018890,NM_000142,NM_000222,NM_005235,NM_006206,NM_006274,NM_000459,NM_000660,NM_005544,NM_002989,NM_001093772,NM_022162,NM_001838,NM_001042747,NM_173174,NM_001006943,NM_002608,NM_002609,NM_002350,NM_153831	true	-0.268754	0.00309406
leukocyte migration involved in inflammatory response(GO:0002523)	10	17	NM_004139,NM_000450,NM_000632,NM_005306,NM_002982,NM_002965,NM_002964,NM_001735,NM_002704,NM_001109	true	0.223224	0.00309853
positive regulation of phosphatidylinositol 3-kinase activity(GO:0043552)	23	53	NM_004119,NM_006113,NM_020526,NM_018890,NM_000142,NM_000222,NM_005235,NM_006206,NM_006274,NM_000459,NM_000660,NM_005544,NM_002989,NM_001093772,NM_022162,NM_001838,NM_001042747,NM_173174,NM_001006943,NM_002608,NM_002609,NM_002350,NM_153831	true	-0.272836	0.00317143
negative regulation of mitochondrion organization(GO:0010823)	26	61	NM_173803,NM_144997,NM_004052,NM_006111,NM_001010931,NM_001010934,NM_006373,NM_018622,NM_201397,NM_170707,NM_005163,NM_016399,NM_000618,NM_013237,NM_005729,NM_017877,NM_024544,NM_138578,NM_138446,NM_181425,NM_003897,NM_145243,NM_144606,NM_001099668,NM_004562,NM_001152	true	0.183881	0.00321117
phospholipid transport(GO:0015914)	48	140	NM_014616,NM_001136493,NM_207627,NM_006095,NM_006045,NM_012417,NM_012399,NM_000040,NM_000039,NM_006553,NM_020453,NM_000078,NM_006432,NM_138813,NM_001005855,ENST00000389967,NM_181671,NM_022437,NM_006224,NM_000350,NM_006254,NM_000482,NM_000483,NM_000527,NM_016399,NM_019112,NM_013237,NM_001007098,NM_001029885,NM_005603,NM_018247,NM_021213,NM_005502,NM_005505,NM_015205,NM_002979,NM_025153,NM_016529,N…	true	-0.199539	0.00321503
synapse assembly(GO:0007416)	78	198	NM_014718,NM_004360,NM_014767,NM_014893,NM_014932,NM_003061,NM_001011515,NM_001278252,NM_020806,NM_001256429,NM_001080457,NM_020795,NM_012309,NM_005045,NM_201591,NM_000916,NM_170735,NM_017420,NM_006457,NM_018977,NM_018930,NM_018939,NM_018934,NM_018933,NM_018931,NM_018938,NM_018936,NM_014063,NM_022449,NM_000314,NM_006237,NM_000484,NM_014236,NM_014271,NM_000665,NM_001164238,NM_000794,NM_000795,NM_0…	true	-0.159993	0.00323802
regulation of purine nucleotide biosynthetic process(GO:1900371)	117	294	NM_052847,NM_004274,NM_007102,NM_001204375,NM_144997,NM_001278497,NM_019888,NM_019884,NM_019839,NM_006180,NM_001039966,NM_001204218,NM_020683,NM_001267609,NM_182978,NM_000025,NM_000024,NM_000054,NM_181874,NM_000960,NM_000906,NM_000908,NM_000910,NM_006496,NM_000164,ENST00000394237,NM_000267,NM_000233,NM_006366,NM_006367,NM_023915,NM_001018065,NM_000315,NM_005184,NM_005166,NM_198184,NM_005100,NM_00…	true	-0.132117	0.00327731
regulation of nucleotide biosynthetic process(GO:0030808)	117	294	NM_052847,NM_004274,NM_007102,NM_001204375,NM_144997,NM_001278497,NM_019888,NM_019884,NM_019839,NM_006180,NM_001039966,NM_001204218,NM_020683,NM_001267609,NM_182978,NM_000025,NM_000024,NM_000054,NM_181874,NM_000960,NM_000906,NM_000908,NM_000910,NM_006496,NM_000164,ENST00000394237,NM_000267,NM_000233,NM_006366,NM_006367,NM_023915,NM_001018065,NM_000315,NM_005184,NM_005166,NM_198184,NM_005100,NM_00…	true	-0.132117	0.00327731
dephosphorylation(GO:0016311)	389	1211	NM_001178117,NM_180976,NM_001172173,NM_007207,NM_007236,NM_007240,NM_014634,NM_007254,NM_007261,NM_018040,NM_014647,NM_172365,NM_001243646,NM_004274,NM_004300,NM_018170,NM_014750,NM_014811,NM_014839,NM_001030059,NM_019892,NM_014840,NM_014845,NM_004090,NM_014931,NM_014906,NM_001080401,NM_004027,NM_004087,NM_004100,NM_020958,NM_020949,NM_001130858,NM_012080,NM_006110,NM_001080476,NM_001080426,NM_00…	true	-0.0738206	0.00328187
regulation of establishment of protein localization to plasma membrane(GO:0090003)	44	113	NM_001034954,NM_004383,NM_004087,NM_020922,NM_012096,NM_001039966,NM_006098,NM_007033,NM_012249,NM_020399,NM_006330,NM_006384,NM_006243,NM_005163,NM_133376,NM_130830,NM_001098424,NM_014448,NM_138370,NM_005856,NM_002740,NM_001665,NM_001663,NM_022152,NM_016492,NM_001003954,NM_015627,NM_138794,NM_015526,NM_138578,NM_017933,NM_033120,NM_001139459,NM_177423,NM_003626,NM_181523,NM_003762,NM_004872,NM_0…	true	-0.20682	0.0033038
protein homooligomerization(GO:0051260)	237	540	NM_173833,NM_014600,NM_014679,NM_018014,NM_172347,NM_001278344,NM_052876,NM_004360,NM_004324,NM_007126,NM_018098,NM_001278464,NM_014950,NM_014946,NM_014932,NM_014905,NM_003018,NM_144772,NM_003052,NM_003036,NM_003042,NM_001112741,NM_004170,NM_004169,NM_001244710,NM_012062,NM_021947,NM_001080414,NM_006098,NM_006077,NM_173555,NM_173562,NM_021830,NM_006012,NM_001256310,NM_020768,NM_001204269,NM_02069…	true	-0.0938858	0.00333001
negative regulation of endothelial cell apoptotic process(GO:2000352)	23	42	NM_004333,NM_007314,NM_007313,NM_006164,NM_021871,NM_000201,NM_001002295,NM_005141,NM_006290,NM_000459,NM_000508,NM_000509,NM_000602,NM_000820,NM_005854,NM_024309,NM_003966,NM_194455,NM_139314,NM_139033,NM_003469,NM_002253,NM_001146	true	0.188762	0.00333157
multicellular organism growth(GO:0035264)	116	205	NM_001256053,AJ271790,NM_012448,NM_001204303,NM_014915,NM_004118,NM_004122,NM_004171,NM_020839,NM_020818,NM_001080432,NM_006060,NM_006031,NM_020733,ENST00000373670,NM_024945,NM_024915,NM_012405,NM_013943,NM_000029,NM_000025,NM_000024,NM_000076,NM_000044,NM_000965,NM_000966,NM_000909,NM_000942,NM_000948,NM_170784,NM_000124,NM_000151,NM_000163,NM_006311,NM_005294,NM_014053,NM_014080,NM_133433,NM_00…	true	-0.132246	0.00337927
tryptophan catabolic process(GO:0006569)	12	32	NM_004059,NM_001010982,NM_012205,NM_016228,NM_001008661,NM_005651,NM_138326,NM_194294,NM_001145526,NM_002164,NM_003679,NM_001032998	true	0.21525	0.00338056
indole-containing compound catabolic process(GO:0042436)	12	32	NM_004059,NM_001010982,NM_012205,NM_016228,NM_001008661,NM_005651,NM_138326,NM_194294,NM_001145526,NM_002164,NM_003679,NM_001032998	true	0.21525	0.00338056
indolalkylamine catabolic process(GO:0046218)	12	32	NM_004059,NM_001010982,NM_012205,NM_016228,NM_001008661,NM_005651,NM_138326,NM_194294,NM_001145526,NM_002164,NM_003679,NM_001032998	true	0.21525	0.00338056
histone H3-K9 methylation(GO:0051567)	18	58	NM_012432,NM_175850,NM_007300,NM_013449,NM_001130823,NM_012238,NM_020226,NM_018699,NM_005375,NM_016374,NM_005322,NM_016734,NM_031915,NM_002892,NM_024757,NM_024670,NM_001040283,NM_004973	true	0.198863	0.0033901
energy coupled proton transmembrane transport, against electrochemical gradient(GO:0015988)	28	131	NM_004231,NM_004047,NM_144699,NM_006019,NM_020632,NM_001017971,NM_005175,NM_005177,NM_001002258,NM_001002031,NM_000704,NM_000702,NM_080653,NM_001693,NM_001692,NM_001690,NM_001686,NM_001695,NM_001694,NM_001696,NM_015941,NM_003945,NM_145230,NM_152565,NM_004691,NM_001001937,NM_001183,NM_001039362	true	-0.250267	0.00339782
ATP hydrolysis coupled proton transport(GO:0015991)	28	131	NM_004231,NM_004047,NM_144699,NM_006019,NM_020632,NM_001017971,NM_005175,NM_005177,NM_001002258,NM_001002031,NM_000704,NM_000702,NM_080653,NM_001693,NM_001692,NM_001690,NM_001686,NM_001695,NM_001694,NM_001696,NM_015941,NM_003945,NM_145230,NM_152565,NM_004691,NM_001001937,NM_001183,NM_001039362	true	-0.250267	0.00339782
centrosome cycle(GO:0007098)	49	133	NM_001100119,NM_014629,NM_014711,NM_004365,NM_004344,NM_007186,NM_001114121,NM_007300,NM_014985,NM_014984,NM_144718,NM_001005207,NM_001037738,NM_012124,NM_000059,NM_170724,NM_018998,NM_201626,NM_000297,NM_017668,NM_016262,NM_018451,NM_030808,NM_014264,NM_013299,NM_018249,NM_001098210,NM_006622,NM_015294,NM_001761,NM_025009,NM_001924,NM_001904,NM_015531,NM_138694,NM_001786,NM_001798,NM_182625,NM_1…	true	0.154978	0.00342375
ureteric bud morphogenesis(GO:0060675)	58	123	NM_018012,NM_001033047,NM_004087,NM_004158,NM_001257206,NM_004143,NM_001005333,NM_000029,NM_006522,NM_017420,NM_000168,NM_000193,NM_001164617,NM_020248,NM_000297,NM_001002295,NM_000346,NM_001190468,NM_000503,NM_000514,NM_018490,NM_005450,NM_005430,NM_030761,NM_005359,NM_000610,NM_000633,NM_000660,NM_000686,NM_001098210,NM_005631,NM_021192,NM_000800,NM_005560,NM_014587,NM_005524,NM_005523,NM_00101…	true	-0.18222	0.00342709
elastic fiber assembly(GO:0048251)	7	15	NM_000052,NM_006329,NM_001040114,NM_001040113,NM_002404,NM_002317,NM_032470	true	-0.418241	0.00348744
regulation of epithelial to mesenchymal transition(GO:0010717)	53	118	NM_007178,NM_013372,NM_173689,NM_003012,NM_003013,NM_020909,NM_012342,NM_182983,ENST00000359999,NM_000088,NM_000192,NM_006341,NM_021784,NM_022343,NM_005233,NM_001003652,NM_017617,NM_016269,NM_000474,NM_021073,NM_005359,NM_133635,NM_000660,NM_030756,NM_001098210,NM_032552,NM_001343,NM_025165,ENST00000331569,NM_025129,NM_005985,NM_005902,NM_015472,NM_002715,NM_001904,NM_138709,NM_017841,NM_145056,N…	true	-0.189427	0.00349192
thymus development(GO:0048538)	40	52	NM_014950,NM_007313,NM_021973,NM_006060,NM_000038,NM_000021,NM_017420,NM_000193,NM_005247,NM_005207,NM_000372,NM_001002295,NM_005461,NM_000454,NM_000448,NM_000447,NM_006871,NM_001257096,NM_000633,NM_001098210,NM_006769,NM_005524,NM_080647,NM_080646,NM_001013838,NM_005982,NM_025099,NM_001904,NM_138621,NM_138576,NM_003593,NM_004973,NM_033051,NM_003824,NM_002585,NM_004701,NM_004612,NM_004473,NM_0044…	true	-0.214444	0.00350283
natural killer cell chemotaxis(GO:0035747)	5	16	NM_005026,NM_006273,NM_002995,NM_002982,NM_002649	true	0.24815	0.00351953
renal system development(GO:0072001)	245	499	NM_007214,NM_014625,NM_007289,NM_018012,NM_014714,NM_004324,NM_004311,NM_014751,NM_144997,NM_004390,NM_004098,NM_001033047,NM_004087,NM_003012,NM_020975,NM_003052,NM_004158,NM_001257206,NM_004143,NM_006167,NM_174936,NM_020856,NM_001005333,NM_001032280,NM_006006,NM_001080508,NM_006005,NM_172037,NM_020630,NM_001010926,NM_012301,NM_000029,NM_000038,NM_000019,NM_000067,NM_000076,NM_005044,NM_000091,N…	true	-0.0918321	0.00352545
endoplasmic reticulum calcium ion homeostasis(GO:0032469)	19	59	NM_004324,NM_001100426,NM_006005,NM_173201,NM_000021,ENST00000394157,NM_000447,NM_000484,NM_000633,NM_016068,NM_014417,NM_000837,NM_198951,NM_138764,NM_033244,NM_033247,NM_033238,NM_004613,NM_001188	true	-0.291646	0.00353413
regulation of muscle cell differentiation(GO:0051147)	122	264	NM_019618,NM_014601,NM_014707,NM_052863,NM_004274,NM_004363,NM_004330,NM_014757,NM_004389,NM_019884,NM_019885,NM_013372,NM_004093,NM_001136239,NM_007313,NM_003030,NM_044472,NM_006181,NM_020856,NM_001039802,NM_006063,NM_006037,NM_012259,NM_012242,NM_020634,NM_173354,NM_000070,NM_000193,NM_017495,NM_018670,NM_001127184,NM_017617,NM_000346,NM_005157,NM_147188,NM_198274,NM_021110,NM_030762,NM_000594,…	true	-0.12846	0.00355182
carnitine transmembrane transport(GO:1902603)	11	30	NM_003059,NM_003060,NM_000098,NM_000387,NM_006252,NM_016203,NM_005399,NM_152246,NM_033125,NM_001093,NM_001031847	true	0.218013	0.00361188
negative regulation of leukocyte chemotaxis(GO:0002689)	8	19	NM_013372,NM_007365,NM_001271749,NM_001204088,NM_002982,NM_001735,NM_001191323,NM_004787	true	-0.398923	0.00361672
asymmetric protein localization(GO:0008105)	18	32	NM_020859,NM_001260492,NM_022474,NM_020335,NM_020399,NM_018695,AK127929,NM_021072,NM_014246,NM_016131,NM_001649,NM_205842,NM_182706,NM_080538,NM_003827,NM_004747,NM_004625,NM_002371	true	-0.297225	0.00362485
comma-shaped body morphogenesis(GO:0072049)	5	14	NM_001010926,NM_005524,NM_002609,NM_001202,NM_003466	true	-0.465002	0.00363422
meiotic chromosome segregation(GO:0045132)	24	67	NM_144998,NM_020937,NM_001005386,NM_012291,NM_001017975,NM_138804,NM_000249,NM_005236,NM_020066,NM_199294,NM_005721,NM_182489,NM_025259,NM_001012410,ENST00000409203,NM_001003811,NM_152764,NM_001067,NM_001068,NM_032132,NM_152524,NM_152510,NM_002441,NM_002440	true	0.186026	0.00364704
protein oligomerization(GO:0051259)	365	842	NM_007236,NM_173833,NM_014600,NM_007269,NM_014679,NM_018014,NM_172347,NM_001206651,NM_001278344,NM_052839,NM_052876,NM_004360,NM_004333,NM_004324,NM_007126,NM_018098,NM_014815,ENST00000374086,NM_001278464,NM_014950,NM_014946,NM_014932,NM_014905,NM_019841,NM_013442,NM_003018,NM_144772,NM_003047,NM_003052,NM_003036,NM_003042,NM_001112741,NM_004170,NM_004169,NM_001244710,NM_001037738,NM_012062,NM_02…	true	-0.0752878	0.00365822
eye morphogenesis(GO:0048592)	123	248	NM_012476,NM_001034853,NM_004324,NM_057168,NM_014874,NM_003036,NM_004185,NM_001271534,NM_021955,NM_001005366,NM_001032280,NM_006015,AB031230,NM_012338,NM_005029,NM_000093,NM_000965,NM_000966,NM_000168,NM_020366,ENST00000379123,NM_000267,NM_000280,NM_000260,NM_000263,NM_005272,NM_021728,NM_198098,NM_005210,NM_133433,NM_000393,NM_006204,NM_017651,NM_000329,NM_000327,NM_000346,NM_006269,NM_006288,NM…	true	-0.127569	0.0036592
cellular amino acid metabolic process(GO:0006520)	458	1392	NM_007262,NM_014614,NM_012448,NM_004280,NM_018122,NM_004332,NM_018114,NM_004341,NM_007101,NM_014754,NM_007198,NM_014814,NM_175859,NM_019891,NM_173642,NM_013328,NM_013391,NM_013358,NM_014905,NM_004044,NM_004059,NM_013406,NM_013417,NM_004104,NM_013445,NM_001242502,NM_007365,NM_207581,NM_004159,NM_004152,NM_175932,NM_004184,NM_001205206,NM_004179,NM_004172,NM_004173,NM_004169,NM_001244710,ENST000003…	true	-0.0673376	0.00367344
negative regulation of glycoprotein metabolic process(GO:1903019)	12	24	NM_012461,NM_021999,NM_012105,NM_012215,NM_001010887,NM_000215,NM_019112,AF307332,NM_002852,NM_001639,NM_001945,NM_004872	true	0.214415	0.00367778
vesicle targeting(GO:0006903)	38	95	NM_013388,NM_014866,NM_014932,NM_004193,NM_021982,NM_006152,NM_001033503,NM_006555,NM_000021,NM_199444,NM_006323,NM_006364,NM_017510,NM_021633,NM_001009939,NM_005498,NM_001024227,NM_006827,NM_018569,NM_006815,NM_016057,NM_016128,NM_001098398,NM_001655,NM_016451,NM_001077207,NM_182706,NM_017983,NM_033127,NM_001252231,NM_003590,NM_004922,NM_003825,NM_004782,NM_004766,NM_003164,NM_004579,NM_183352	true	-0.218248	0.00368222
regulation of protein autophosphorylation(GO:0031952)	31	62	NM_007236,ENST00000383771,NM_013372,ENST00000341435,NM_001277126,NM_000118,NM_018948,NM_017458,NM_000207,NM_006208,NM_005184,NM_001288630,NM_005486,NM_021033,NM_006888,NM_005590,NM_021183,NM_005732,NM_001495,NM_002886,NM_001743,NM_002715,NM_001191323,NM_033023,NM_002506,NM_002608,NM_002607,NM_004797,NM_002485,NM_002228,NM_004440	true	-0.238072	0.00368776
regulation of stem cell differentiation(GO:2000736)	92	233	NM_018055,NM_007178,NM_014887,NM_013372,NM_173689,NM_003012,NM_003013,NM_020909,NM_021818,NM_001010926,NM_012342,NM_182983,ENST00000359999,NM_000088,NM_017420,NM_000192,NM_006341,NM_021784,NM_017508,NM_005257,NM_022343,NM_005233,NM_001003652,NM_006206,NM_017617,NM_000346,NM_016269,NM_000474,NM_021073,NM_021070,NM_005359,NM_133635,NM_006887,NM_000660,NM_030756,NM_001098210,NM_005631,NM_005612,NM_2…	true	-0.146063	0.0037285
cardiac cell development(GO:0055006)	53	112	NM_001256012,NM_004274,NM_014757,NM_019884,NM_001136271,NM_001267550,NM_012259,NM_000029,NM_000232,NM_006395,NM_006393,NM_170707,NM_006206,NM_017617,NM_005159,NM_000432,NM_133379,NM_133378,NM_021110,NM_021097,NM_000684,NM_000686,NM_014482,NM_001173408,NM_182493,NM_153370,NM_032608,NM_005876,NM_001281435,NM_031966,NM_001338,NM_016569,NM_002763,NM_015311,NM_022135,NM_001166175,NM_001786,ENST0000036…	true	-0.188127	0.003749
GO:0032320	302	855	NM_014688,NM_014689,NM_014629,NM_014636,NM_018071,NM_014604,NM_012454,NM_014705,NM_052843,NM_018125,NM_004327,NM_019555,NM_004308,NM_144973,NM_144977,NM_018173,NM_014744,NM_007118,NM_007197,NM_014786,NM_018098,NM_014808,NM_014832,NM_001030055,ENST00000393277,NM_001243765,ENST00000377494,NM_014853,NM_014857,NM_014856,NM_014957,NM_019850,NM_013401,NM_173728,NM_013427,NM_003012,NM_020946,NM_007368,N…	true	-0.0822665	0.00379901
regulation of the force of heart contraction(GO:0002026)	23	51	NM_003047,NM_001204218,NM_006541,NM_000152,NM_000258,NM_000257,NM_021097,NM_000603,NM_000619,NM_000620,NM_000679,NM_000684,NM_000702,NM_001753,NM_001684,NM_001619,NM_002737,NM_002667,NM_001956,NM_001001396,NM_002471,NM_002476,NM_003476	true	-0.268554	0.00380876
embryonic eye morphogenesis(GO:0048048)	29	62	NM_012476,NM_057168,NM_001005366,NM_001032280,NM_006015,AB031230,NM_000965,NM_000966,NM_000474,NM_005413,NM_000693,NM_001142620,NM_199292,NM_022740,NM_032590,NM_001452,NM_023067,NM_005994,NM_002763,NM_001048183,NM_003990,NM_138473,NM_002181,NM_001199042,NM_003108,NM_003111,NM_002335,NM_002336,NM_003392	true	-0.244066	0.0038175
cellular response to gamma radiation(GO:0071480)	14	30	NM_006106,NM_207118,NM_000051,NM_000101,NM_000553,NM_006852,NM_024092,NM_001964,NM_001885,NM_145018,NM_138578,NM_001284363,NM_001184,NM_033512	true	0.207882	0.00382585
regulation of actin filament bundle assembly(GO:0032231)	68	132	NM_014629,NM_014634,NM_007286,NM_004333,NM_007127,NM_014906,NM_173728,NM_013427,NM_003012,NM_006105,NM_006125,NM_001135190,NM_001113490,NM_000039,NM_005022,NM_018890,NM_133265,NM_000958,NM_000934,ENST00000395358,ENST00000394243,NM_000261,NM_005232,NM_000366,NM_000368,NM_017640,NM_022334,NM_181832,NM_181831,NM_005406,NM_030761,NM_013241,NM_016337,ENST00000360635,NM_001143778,NM_016148,NM_005775,NM…	true	-0.16764	0.00382799
mononuclear cell migration(GO:0071674)	14	27	NM_004054,NM_004072,NM_000301,NM_170610,NM_001142343,NM_021073,NM_000594,NM_000589,NM_002982,NM_002889,NM_002843,NM_003246,NM_004787,NM_002306	true	0.207825	0.00384755
RNA 5'-end processing(GO:0000966)	6	12	NM_018068,XM_005273551,NM_014503,NM_017819,NM_003703,NM_033109	true	0.240442	0.00386843
L-kynurenine metabolic process(GO:0097052)	5	14	NM_004059,NM_016228,NM_001008661,NM_002080,NM_001032998	true	0.247133	0.00390315
regulation of fibroblast migration(GO:0010762)	20	48	NM_004333,NM_007353,NM_021995,NM_001017368,NM_005246,NM_001164741,NM_022334,NM_005400,NM_000660,ENST00000360635,NM_001523,NM_001014796,NM_001978,NM_015910,NM_024841,NM_033158,NM_004874,NM_003246,NM_004763,ENST00000367922	true	-0.28335	0.00391095
cardiac muscle cell myoblast differentiation(GO:0060379)	12	32	NM_013372,NM_017617,NM_005612,NM_203284,NM_005994,NM_001191323,NM_153026,NM_001146312,NM_153604,NM_003181,NM_003131,NM_002202	true	-0.343596	0.00397045
Fc receptor mediated stimulatory signaling pathway(GO:0002431)	79	240	NM_001178126,NM_001030059,NM_004383,NM_007355,NM_004106,NM_007313,NM_044472,NM_001080529,NM_006153,NM_006113,NM_001005386,NM_001039802,NM_001278556,NM_001017963,NM_012334,NM_000073,NM_005027,NM_018890,NM_133264,NM_006409,NM_017451,NM_001270439,NM_017534,ENST00000492167,NM_198053,NM_000377,NM_006218,NM_006219,NM_001004426,NM_006254,NM_005157,NM_021642,NM_138957,ENST00000390243,ENST00000390244,NM_0…	true	-0.155834	0.00397157
tryptophan metabolic process(GO:0006568)	13	37	NM_004059,NM_001010982,NM_012205,NM_000052,NM_016228,NM_001008661,NM_005651,NM_138326,NM_194294,NM_001145526,NM_002164,NM_003679,NM_001032998	true	0.210381	0.00400596
anion transport(GO:0006820)	464	1357	NM_004211,NM_078483,NM_004218,NM_173872,NM_007220,NM_007256,NM_014616,NM_018057,NM_018043,NM_001256023,NM_018018,NM_012450,NM_012434,NM_052832,NM_001136493,NM_001023587,NM_004254,NM_004256,NM_004252,NM_004366,NM_004317,NM_019594,NM_007117,NM_057176,NM_173626,NM_013356,ENST00000256969,NM_014905,NM_019848,NM_019849,NM_019844,ENST00000376497,NM_004102,NM_003014,NM_207627,NM_020959,NM_020949,NM_00736…	true	-0.066282	0.00400712
sequestering of metal ion(GO:0051238)	39	82	NM_001256022,NM_004343,NM_013309,ENST00000276198,NM_020533,NM_000053,NM_006387,NM_000297,NM_133496,NM_001004434,NM_006274,NM_054033,NM_000540,NM_005400,NM_005356,NM_014417,NM_000795,NM_000867,NM_000801,NM_002995,NM_002989,NM_002965,NM_002964,NM_002963,NM_024103,NM_001992,NM_015525,NM_001838,NM_001172813,NM_139075,ENST00000371951,NM_002032,NM_001261826,NM_003299,NM_001035,NM_003130,NM_001232,NM_00…	true	-0.213695	0.00408252
DNA replication checkpoint(GO:0000076)	11	38	NM_001080449,NM_001018159,NM_030928,NM_182489,NM_152259,NM_002873,NM_022111,NM_017858,NM_003504,NM_001254,NM_004584	true	0.216748	0.00409791
cardiac muscle cell development(GO:0055013)	52	110	NM_001256012,NM_004274,NM_014757,NM_019884,NM_001136271,NM_001267550,NM_012259,NM_000029,NM_000232,NM_006395,NM_006393,NM_170707,NM_006206,NM_005159,NM_000432,NM_133379,NM_133378,NM_021110,NM_021097,NM_000684,NM_000686,NM_014482,NM_001173408,NM_182493,NM_153370,NM_032608,NM_005876,NM_001281435,NM_031966,NM_001338,NM_016569,NM_002763,NM_015311,NM_022135,NM_001166175,NM_001786,ENST00000361484,NM_19…	true	-0.188084	0.00409867
negative regulation of release of cytochrome c from mitochondria(GO:0090201)	14	45	NM_001010931,NM_001010934,NM_018622,NM_201397,NM_170707,NM_005163,NM_016399,NM_000618,NM_013237,NM_005729,NM_138578,NM_181425,NM_001099668,NM_004562	true	0.207132	0.00411912
regulation of insulin secretion involved in cellular response to glucose stimulus(GO:0061178)	33	58	NM_004322,NM_014807,NM_004041,NM_174889,NM_001256627,NM_020665,NM_021784,NM_021724,NM_014172,NM_000436,NM_054033,NM_005400,NM_000681,NM_030756,NM_000756,NM_021132,NM_000859,NM_001503,NM_001962,NM_001012271,NM_003957,NM_001014980,NM_002124,NM_002054,NM_003560,NM_001135659,NM_001001852,NM_001099744,NM_003130,NM_002335,NM_001040455,NM_003355,NM_004439	true	-0.228615	0.00428385
glucagon secretion(GO:0070091)	7	12	NM_004291,NM_004123,NM_000230,NM_000600,NM_000756,NM_015148,NM_001252124	true	0.233573	0.00431407
7-methylguanosine mRNA capping(GO:0006370)	28	75	NM_007362,NM_004128,NM_021974,NM_001278714,NM_005034,NM_000938,NM_000122,NM_006233,NM_006234,NM_000400,NM_021128,NM_005316,NM_015050,NM_018348,NM_001517,NM_001516,NM_002696,NM_002695,NM_031452,NM_001799,ENST00000369475,NM_002096,NM_003800,NM_004805,NM_002486,NM_003169,NM_002431,NM_001239	true	-0.244795	0.00433257
negative regulation of leukocyte proliferation(GO:0070664)	50	138	NM_007261,NM_007268,NM_012452,NM_004346,NM_013372,NM_004087,NM_003019,NM_144717,NM_001030288,NM_020651,NM_001024736,NM_000051,NM_000193,NM_005214,NM_014009,NM_000311,NM_006290,NM_181780,NM_014143,NM_000417,NM_170662,NM_000572,NM_000586,NM_000660,NM_014452,NM_000852,NM_005512,NM_002995,NM_001454,NM_025239,NM_005874,NM_030571,NM_022153,NM_001191323,NM_002124,NM_002127,NM_002164,NM_002181,NM_015973,…	true	-0.190239	0.00436117
developmental cell growth(GO:0048588)	109	212	NM_007283,NM_007284,NM_014683,NM_018014,NM_001271938,NM_004263,NM_004274,NM_001204303,NM_001080395,NM_019884,NM_013366,NM_004097,NM_004114,NM_007313,NM_003062,NM_003061,NM_004186,NM_001271534,NM_006168,NM_020851,NM_006080,NM_020532,NM_001024847,NM_000029,NM_000966,NM_001024629,NM_018977,NM_017514,NM_006321,NM_006378,NM_001287438,NM_005215,NM_014000,NM_001164741,NM_000346,NM_001142287,NM_020063,NM…	true	-0.132638	0.00436464
spinal cord development(GO:0021510)	82	112	NM_004281,ENST00000374139,NM_004316,NM_013375,NM_003061,NM_020999,NM_006195,NM_006168,NM_001080461,NM_012182,NM_001113498,NM_013945,NM_020405,NM_006562,NM_001098834,NM_005045,NM_133267,NM_017409,NM_000168,NM_000193,NM_018941,NM_000267,NM_005270,NM_000296,NM_022363,NM_000297,NM_018684,NM_017617,NM_005169,NM_000400,NM_001009944,NM_016277,NM_006943,NM_005450,NM_005430,NM_030792,NM_019074,NM_00102986…	true	-0.15156	0.00439307
UDP-glucuronate metabolic process(GO:0046398)	5	13	NM_006759,NM_018371,NM_015139,NM_001130518,NM_003359	true	0.245944	0.00439614
regulation of centrosome duplication(GO:0010824)	20	49	NM_001100119,NM_007300,NM_014984,NM_144718,NM_001005207,NM_001037738,NM_012124,NM_170724,NM_018451,NM_014264,NM_018249,NM_006622,NM_015294,NM_001761,NM_138694,NM_182625,NM_004850,NM_002520,NM_153704,NM_003400	true	0.191752	0.00442098
chondrocyte proliferation(GO:0035988)	12	23	NM_000142,NM_001014796,NM_005941,NM_001901,NM_016932,NM_002181,NM_004995,NM_003155,NM_001204,NM_002343,NM_003483,ENST00000367922	true	-0.340517	0.00443656
regulation of myeloid cell apoptotic process(GO:0033032)	22	43	NM_004031,NM_004106,NM_012238,NM_000042,NM_000077,NM_001017405,NM_000314,NM_018445,NM_000633,NM_013252,NM_030752,NM_000799,NM_000899,NM_022162,NM_001557,NM_177551,NM_003250,NM_004797,NM_002415,NM_003183,NM_003152,NM_002397	true	-0.269594	0.00445831
regulation of monocyte chemotaxis(GO:0090025)	17	45	NM_013372,NM_020672,NM_001204088,NM_005084,NM_006368,NM_000609,NM_000602,NM_199168,NM_002982,NM_002963,NM_001191323,NM_001123041,NM_004787,NM_001123396,NM_001033886,NM_002350,NM_001295	true	-0.298249	0.00451108
adrenal gland development(GO:0030325)	24	49	NM_004316,NM_006079,NM_000039,NM_000076,NM_000102,NM_000267,NM_006206,NM_000475,NM_030761,NM_001142620,NM_000756,NM_005860,NM_002968,NM_001012334,NM_024426,NM_015881,NM_001042492,NM_002196,NM_004959,NM_001199042,NM_002585,NM_002609,NM_032199,NM_004626	true	-0.259591	0.00457713
positive regulation of macrophage chemotaxis(GO:0010759)	7	14	NM_004054,NM_004072,NM_001142343,NM_002982,NM_002889,NM_002843,NM_003246	true	0.232964	0.00458173
positive regulation of nuclease activity(GO:0032075)	67	163	NM_014685,NM_014674,NM_004287,NM_004343,NM_014760,NM_014780,NM_057161,NM_019884,NM_013388,NM_004094,NM_004082,NM_004083,NM_007348,NM_003029,NM_001244710,NM_006005,NM_012328,NM_172230,NM_005080,NM_000018,NM_020470,NM_170707,NM_000391,NM_006244,NM_006289,NM_014189,NM_001257145,NM_005347,NM_000596,NM_000584,NM_019107,NM_016306,NM_006810,NM_014445,NM_021203,NM_014593,NM_005742,NM_005730,NM_001012511,…	true	-0.165572	0.00461897
single-organism cellular localization(GO:1902580)	449	1193	NM_004218,NM_019619,NM_007214,NM_001204404,NM_007209,NM_007236,NM_018087,NM_014600,NM_014601,NM_018026,NM_001030001,NM_012460,NM_012456,NM_012423,NM_012479,NM_004360,NM_004324,NM_018116,NM_007104,NM_004322,NM_007111,NM_007107,NM_004317,NM_014752,NM_007183,NM_057174,NM_014802,NM_001034996,NM_001034954,NM_004383,NM_013336,NM_013337,NM_013330,NM_014932,NM_173660,NM_004068,NM_004087,NM_004106,NM_0041…	true	-0.0662922	0.00462637
single-organism localization(GO:1902578)	449	1193	NM_004218,NM_019619,NM_007214,NM_001204404,NM_007209,NM_007236,NM_018087,NM_014600,NM_014601,NM_018026,NM_001030001,NM_012460,NM_012456,NM_012423,NM_012479,NM_004360,NM_004324,NM_018116,NM_007104,NM_004322,NM_007111,NM_007107,NM_004317,NM_014752,NM_007183,NM_057174,NM_014802,NM_001034996,NM_001034954,NM_004383,NM_013336,NM_013337,NM_013330,NM_014932,NM_173660,NM_004068,NM_004087,NM_004106,NM_0041…	true	-0.0662922	0.00462637
sulfur compound biosynthetic process(GO:0044272)	157	422	NM_004267,NM_004273,NM_004386,NM_004385,NM_175856,NM_173642,NM_013352,NM_019886,NM_014918,NM_004104,NM_003033,NM_006100,NM_174963,NM_021814,NM_006041,NM_020734,NM_020786,NM_007001,NM_007035,NM_001242831,NM_024930,NM_130468,NM_006577,NM_006574,NM_000071,NM_005014,NM_000925,NM_000108,NM_000112,NM_000127,NM_022569,NM_198427,NM_000284,NM_000254,NM_133507,NM_018641,NM_018659,NM_022445,NM_018677,NM_019…	true	-0.11065	0.00463738
mesenchymal-epithelial cell signaling(GO:0060638)	7	13	NM_001010931,NM_001010934,NM_019102,NM_002160,NM_002009,NM_003392,NM_004465	true	0.232788	0.00466126
visual behavior(GO:0007632)	50	78	NM_001030013,NM_004333,NM_001204303,NM_001256214,NM_007327,NM_007314,NM_004171,NM_021920,NM_021932,NM_012182,NM_000924,NM_199460,NM_006480,NM_001185091,NM_000267,NM_000272,NM_000222,NM_000332,NM_138999,NM_014183,NM_138966,NM_133376,NM_000484,NM_005343,NM_016356,NM_021008,NM_000679,NM_000787,NM_000794,NM_000795,NM_000748,NM_006772,NM_000702,NM_000859,NM_000833,NM_005522,NM_015102,NM_001093772,NM_0…	true	-0.188795	0.00470187
regulation of osteoblast proliferation(GO:0033688)	24	49	NM_001204375,NM_013372,NM_007313,NM_003012,NM_006157,NM_000908,NM_000633,NM_022970,NM_016085,NM_006665,NM_014587,NM_005902,NM_002759,NM_001664,NM_002673,NM_001554,NM_001191323,NM_138455,ENST00000359354,NM_001135652,NM_001200,NM_002343,NM_002335,NM_002210	true	-0.258912	0.00470775
regulation of hormone levels(GO:0010817)	398	900	NM_004218,NM_014693,NM_007269,NM_007289,NM_001030005,NM_012448,NM_004291,NM_004248,NM_004322,NM_007117,NM_014752,NM_001267843,NM_057157,NM_014807,NM_019891,NM_001205293,NM_019885,NM_207578,NM_014904,NM_004043,NM_004041,ENST00000276198,NM_004075,NM_004109,NM_004122,NM_004123,NM_003020,NM_001242502,NM_003012,NM_174889,NM_014980,NM_001178065,NM_007375,NM_207581,NM_003081,NM_003054,NM_004161,NM_00415…	true	-0.0701699	0.00471968
camera-type eye development(GO:0043010)	244	418	NM_004235,NM_014617,NM_001256012,NM_014714,NM_012476,NM_004366,NM_004324,NM_057168,NM_175875,NM_014874,NM_057093,NM_004087,NM_173728,NM_013435,NM_001174146,NM_003072,NM_003078,NM_020975,NM_020989,NM_003036,NM_001112704,NM_004148,NM_004185,NM_001271534,NM_006193,NM_012064,NM_001172435,NM_001005366,NM_001032280,NM_012186,NM_012193,NM_006059,NM_006060,NM_006015,NM_172037,NM_007035,NM_024915,NM_00103…	true	-0.0891031	0.0047416
camera-type eye morphogenesis(GO:0048593)	94	192	NM_004324,NM_057168,NM_014874,NM_003036,NM_004185,NM_001271534,NM_001005366,NM_001032280,NM_006015,AB031230,NM_012338,NM_005029,NM_000168,ENST00000379123,NM_000267,NM_000280,NM_005272,NM_198098,NM_005210,NM_006204,NM_017651,NM_000329,NM_000327,NM_000346,NM_006269,NM_006288,NM_014290,NM_000474,NM_021072,NM_006914,NM_005413,NM_014344,NM_000693,NM_018262,NM_001142620,NM_006744,NM_199292,NM_014587,NM…	true	-0.140951	0.00475682
nitric oxide biosynthetic process(GO:0006809)	55	154	NM_014697,NM_004235,NM_007355,NM_134260,NM_012137,NM_001204218,NM_001122742,NM_001017963,NM_013974,NM_000029,NM_000050,NM_000961,NM_000963,NM_000903,NM_000125,NM_000161,NM_000208,NM_000207,NM_000201,NM_005258,NM_005228,NM_000297,NM_005163,NM_001008504,NM_000518,NM_005348,NM_201282,NM_201283,NM_000572,NM_000576,NM_000594,NM_000589,NM_000603,NM_000619,NM_000620,NM_000625,NM_001024071,NM_000686,NM_0…	true	0.146145	0.00477469
cyclic purine nucleotide metabolic process(GO:0052652)	138	345	NM_052847,NM_004274,NM_007102,NM_001204375,NM_001278497,NM_019888,NM_019884,NM_019839,NM_004037,ENST00000276198,NM_004036,NM_006172,NM_006180,NM_001039966,NM_001204218,NM_020683,NM_001267609,NM_020546,NM_182978,NM_000025,NM_000024,NM_000054,NM_181874,NM_000960,NM_000906,NM_000908,NM_000910,NM_006496,NM_000164,NM_000180,ENST00000394237,NM_000267,NM_000233,NM_006366,NM_006367,NM_198098,NM_023915,NM…	true	-0.117222	0.00482616
regulation of G1/S transition of mitotic cell cycle(GO:2000045)	125	373	NM_078467,NM_014614,NM_019606,NM_018124,NM_014814,NM_004064,NM_003072,NM_004159,NM_175932,NM_173491,NM_001159704,NM_012179,NM_024900,NM_001204186,NM_001083956,NM_000051,NM_005047,NM_006503,NM_018955,NM_017495,NM_017553,NM_001287439,NM_000297,NM_022457,NM_000314,NM_000321,NM_006263,NM_021627,NM_148976,NM_000546,NM_014241,NM_006904,NM_005427,NM_016399,NM_021009,NM_000633,NM_013263,NM_006814,NM_0529…	true	-0.122769	0.00487874
positive regulation of actin cytoskeleton reorganization(GO:2000251)	14	46	NM_006118,NM_018842,NM_017679,NM_000459,NM_005335,NM_005343,NM_001007156,NM_000759,ENST00000394480,NM_001012338,NM_002005,NM_004935,NM_002527,NM_002530	true	-0.318837	0.00491143
phagocytosis, engulfment(GO:0006911)	17	47	NM_007261,NM_018053,NM_004106,NM_018890,NM_005242,NM_016293,NM_005337,NM_019112,NM_016315,NM_005638,NM_005502,NM_001380,NM_005928,NM_001252668,NM_003246,NM_002203,NM_001140	true	-0.295969	0.00491977
digestive system development(GO:0055123)	129	218	NM_173834,NM_018055,NM_001271938,NM_004360,NM_004316,NM_018190,NM_001136271,NM_004123,NM_003015,NM_003030,NM_003012,NM_003013,NM_020909,NM_020975,NM_021926,NM_021958,NM_021818,NM_020630,NM_012391,NM_001024847,NM_005080,NM_000022,NM_021570,NM_000076,NM_000090,NM_000965,NM_000916,NM_000168,NM_000193,NM_020335,NM_020375,NM_022553,NM_000222,NM_000208,NM_000209,NM_000210,NM_000213,NM_005270,NM_005269,…	true	-0.120818	0.00492056
negative regulation of kinase activity(GO:0033673)	188	460	NM_007207,NM_007236,NM_014634,NM_007262,NM_007261,NM_007271,NM_012479,NM_052880,NM_004346,NM_144949,NM_007199,NM_004383,NM_004375,NM_001278160,NM_078626,NM_004090,NM_014906,NM_004064,NM_007313,NM_004124,NM_003015,NM_003012,NM_003013,NM_020972,NM_004157,NM_175918,NM_004181,NM_001037738,NM_134323,NM_006153,NM_006142,NM_006098,NM_012179,NM_012116,NM_012124,NM_007045,NM_012238,NM_001204186,NM_0012705…	true	-0.100726	0.00492898
cellular response to biotic stimulus(GO:0071216)	120	302	NM_014633,NM_001037341,NM_004271,NM_004345,NM_007313,NM_004120,NM_001174104,NM_001037499,NM_004139,NM_207315,NM_021913,NM_021975,NM_021805,NM_006068,NM_006005,NM_001278548,NM_001278547,NM_020661,NM_012237,NM_020529,NM_005007,NM_181861,NM_000952,NM_000102,NM_020353,NM_018965,NM_000201,NM_005263,NM_021724,NM_020198,NM_000349,NM_001164722,NM_006290,NM_147156,NM_001079821,NM_148910,NM_000546,NM_00540…	true	0.110578	0.00494376
positive regulation of ERK1 and ERK2 cascade(GO:0070374)	120	292	NM_018055,NM_004333,NM_004313,NM_019851,NM_004041,ENST00000276198,NM_001033047,NM_007314,NM_007313,NM_001039966,NM_006092,NM_021871,NM_001271749,NM_020638,ENST00000571800,NM_207103,ENST00000380573,NM_001024629,NM_000934,NM_000142,NM_020311,NM_018965,NM_020377,NM_006384,NM_000201,NM_022343,NM_005242,NM_005235,NM_005228,NM_005215,NM_005211,NM_133468,NM_006206,NM_181745,NM_006274,NM_005141,NM_005117…	true	-0.125004	0.00494443
positive regulation of transmembrane receptor protein serine/threonine kinase signaling pathway(GO:0090100)	68	188	NM_018055,NM_004329,NM_144997,NM_173689,NM_004143,NM_006079,NM_012245,NM_020648,NM_001010926,ENST00000359999,NM_000020,NM_000076,NM_000118,NM_020328,NM_001164617,NM_001003652,NM_017617,NM_000455,NM_021073,NM_130803,NM_005359,NM_000660,NM_014482,NM_052972,NM_018373,NM_022740,NM_005524,NM_005716,NM_203284,NM_001014795,NM_015170,NM_001343,NM_001320,NM_001718,NM_022066,NM_001616,NM_001618,NM_002701,N…	true	-0.163209	0.00496182
morphogenesis of a branching structure(GO:0001763)	185	335	NM_012431,NM_004360,NM_004324,NM_004390,NM_001243756,NM_001033047,NM_004087,NM_003030,NM_003012,NM_003013,NM_001178065,NM_004158,NM_001257206,NM_004143,NM_006167,NM_001005333,NM_006080,NM_172037,NM_001010931,NM_001010934,NM_001122742,NM_013943,NM_020532,NM_001024847,NM_000029,NM_006572,NM_000044,NM_006522,NM_001024629,NM_000926,NM_000118,NM_017420,NM_000168,NM_000193,NM_022475,NM_020335,NM_021784…	true	-0.101432	0.00496536
response to interleukin-1(GO:0070555)	62	168	NM_173843,NM_004345,NM_007199,NM_007308,NM_003012,NM_004143,NM_021975,NM_006167,NM_006037,NM_182965,NM_000961,NM_000101,NM_000201,NM_000346,NM_005141,NM_016270,NM_001288837,NM_000450,NM_014272,NM_000584,NM_006895,NM_013258,NM_014391,NM_005328,NM_000781,NM_022828,NM_000799,NM_021231,NM_030955,NM_138330,NM_182493,NM_032588,NM_032552,NM_001015892,NM_002982,NM_015192,NM_153281,NM_002740,NM_002737,NM_…	true	0.1402	0.00497434
negative regulation of protein kinase activity(GO:0006469)	174	436	NM_007207,NM_007236,NM_014634,NM_007262,NM_007261,NM_007271,NM_012479,NM_004346,NM_144949,NM_007199,NM_001278160,NM_078626,NM_004090,NM_014906,NM_004064,NM_007313,NM_004124,NM_003015,NM_003012,NM_003013,NM_020972,NM_004157,NM_175918,NM_004181,NM_001037738,NM_134323,NM_006153,NM_006142,NM_006098,NM_012179,NM_012116,NM_012124,NM_007045,NM_012238,NM_001204186,NM_001270519,NM_000038,NM_000021,NM_0000…	true	-0.10444	0.00498709
positive regulation of cyclic nucleotide biosynthetic process(GO:0030804)	71	154	NM_001278497,NM_019888,NM_019884,NM_006180,NM_001039966,NM_020683,NM_001267609,NM_182978,NM_000025,NM_000024,NM_000054,NM_000960,NM_000906,NM_000164,ENST00000394237,NM_000267,NM_000233,NM_006366,NM_006367,NM_001018065,NM_000315,NM_005184,NM_198184,NM_005100,NM_021081,NM_000529,NM_130806,NM_006888,NM_000677,NM_000675,NM_000676,NM_000684,NM_000794,NM_000798,NM_000756,NM_000823,NM_005502,NM_00126558…	true	-0.159795	0.00501734
regulation of epithelial cell proliferation(GO:0050678)	228	501	NM_018055,NM_018046,NM_018010,NM_012461,NM_004360,NM_004324,NM_004329,NM_004322,NM_014751,NM_007178,NM_004093,NM_014909,NM_004064,NM_004087,NM_003012,NM_003013,NM_003068,NM_020839,NM_020800,NM_006167,NM_006142,NM_001005333,NM_006072,NM_012186,NM_021818,NM_001080508,NM_020761,NM_001271749,NM_001122772,NM_001017967,NM_000042,NM_182983,NM_000038,NM_020427,NM_000020,NM_000076,NM_000044,NM_000059,NM_0…	true	-0.0914716	0.00503774
paraxial mesoderm development(GO:0048339)	13	25	NM_004329,NM_020909,NM_005251,NM_001003652,ENST00000261396,NM_016269,NM_018230,NM_001453,NM_005902,NM_205842,NM_033131,NM_002111,NM_004609	true	-0.32705	0.00504754
regulation of endothelial cell migration(GO:0010594)	90	237	NM_004235,NM_014707,NM_001080391,NM_014909,NM_001113490,NM_000029,NM_000042,NM_000020,NM_000963,NM_133265,NM_199418,NM_001024629,NM_006419,NM_000267,NM_000245,NM_006384,NM_000212,NM_005251,NM_005238,NM_022367,NM_133459,NM_133468,NM_017617,NM_001002295,NM_005139,NM_005163,NM_022334,NM_000412,NM_017679,NM_130847,NM_000459,NM_016202,NM_021005,NM_019074,NM_000660,NM_013232,ENST00000360635,NM_000697,N…	true	-0.142835	0.00508301
negative regulation of axonogenesis(GO:0050771)	43	77	NM_014683,NM_018014,NM_004263,NM_004309,NM_001080395,NM_004114,NM_001037442,NM_003061,NM_004186,NM_006080,NM_020532,NM_000021,NM_017514,NM_005215,NM_000314,NM_001164741,NM_006288,NM_199002,NM_030753,NM_006772,NM_022893,NM_001493,NM_023004,NM_005977,NM_005954,NM_001664,NM_001025100,NM_032808,NM_003966,NM_138559,NM_198545,NM_033131,NM_003565,NM_003885,NM_004935,NM_001040058,NM_004822,NM_002507,NM_0…	true	-0.200179	0.00511813
necrotic cell death(GO:0070265)	39	83	NM_004324,NM_001278464,NM_012062,NM_001278548,NM_012237,NM_012215,NM_000043,NM_001127184,NM_017672,NM_000546,NM_000594,NM_006871,NM_000639,NM_014320,NM_052932,NM_021138,AF307332,NM_005729,NM_015247,NM_002863,NM_005923,NM_005954,NM_001202519,NM_001162383,NM_138575,NM_001126118,NM_031229,NM_003651,NM_003879,NM_003824,NM_003804,NM_003265,NM_004723,NM_152649,NM_032306,NM_001165,NM_001166,NM_001151,NM…	true	0.161031	0.00511987
atrioventricular valve development(GO:0003171)	16	26	NM_012259,NM_000192,NM_017617,NM_000474,NM_005359,NM_014571,NM_001166220,NM_001554,NM_002052,NM_001040708,NM_003107,NM_001200,NM_153813,NM_002230,NM_001105,NM_004428	true	-0.301908	0.0051225
establishment or maintenance of cell polarity(GO:0007163)	132	295	NM_004227,NM_019619,NM_018027,NM_018012,CR749417,NM_014904,NM_173689,NM_004087,NM_004114,NM_003015,NM_004145,NM_004140,NM_044472,NM_001080542,NM_173496,NM_012090,NM_006185,NM_006101,NM_001005386,NM_006098,NM_001039802,NM_006035,NM_001080507,NM_001039876,NM_001030288,NM_001256627,NM_001113490,NM_013943,NM_000037,ENST00000359999,NM_000073,NM_020477,NM_001258299,NM_006519,NM_000193,NM_020335,NM_0064…	true	-0.118857	0.00516345
insulin secretion involved in cellular response to glucose stimulus(GO:0035773)	37	64	NM_004218,NM_004322,NM_014807,NM_014904,NM_004041,NM_174889,NM_001256627,NM_020665,NM_021784,NM_021724,NM_014172,NM_000436,NM_016275,NM_054033,NM_005400,NM_000681,NM_030756,NM_000756,NM_021132,NM_000859,NM_001503,NM_015470,NM_001962,NM_001012271,NM_003957,NM_001014980,NM_002124,NM_002054,NM_003560,NM_001135659,NM_001001852,NM_001099744,NM_003130,NM_002335,NM_001040455,NM_003355,NM_004439	true	-0.213549	0.00518533
retina vasculature morphogenesis in camera-type eye(GO:0061299)	10	15	NM_173728,NM_012193,NM_020663,NM_013943,NM_001024629,NM_000266,NM_001845,NM_003615,NM_003873,NM_002335	true	-0.359002	0.00518548
positive regulation of DNA biosynthetic process(GO:2000573)	7	22	NM_001010931,NM_001010934,NM_016457,NM_002608,NM_002609,NM_213647,NM_002467	true	0.231667	0.00519797
positive regulation of homotypic cell-cell adhesion(GO:0034112)	7	28	NM_020987,NM_000610,NM_005328,NM_001978,NM_003701,NM_033012,NM_002305	true	-0.405863	0.00521841
platelet activating factor metabolic process(GO:0046469)	5	6	NM_000929,NM_020244,NM_000430,NM_024420,NM_017839	true	-0.452904	0.00525034
molybdopterin cofactor biosynthetic process(GO:0032324)	8	35	NM_020806,NM_021100,NM_014484,NM_025207,NM_001198989,NM_005943,NM_017947,NM_004531	true	0.226421	0.00529034
molybdopterin cofactor metabolic process(GO:0043545)	8	35	NM_020806,NM_021100,NM_014484,NM_025207,NM_001198989,NM_005943,NM_017947,NM_004531	true	0.226421	0.00529034
Mo-molybdopterin cofactor biosynthetic process(GO:0006777)	8	35	NM_020806,NM_021100,NM_014484,NM_025207,NM_001198989,NM_005943,NM_017947,NM_004531	true	0.226421	0.00529034
prosthetic group metabolic process(GO:0051189)	8	35	NM_020806,NM_021100,NM_014484,NM_025207,NM_001198989,NM_005943,NM_017947,NM_004531	true	0.226421	0.00529034
Mo-molybdopterin cofactor metabolic process(GO:0019720)	8	35	NM_020806,NM_021100,NM_014484,NM_025207,NM_001198989,NM_005943,NM_017947,NM_004531	true	0.226421	0.00529034
regulation of viral process(GO:0050792)	153	456	NM_004335,NM_007192,NM_001206491,NM_014788,NM_004396,NM_001080391,NM_007362,NM_007375,NM_003073,NM_003072,NM_003064,NM_004128,NM_134323,NM_021974,NM_006187,NM_001278714,NM_006139,NM_001080466,NM_021822,NM_020746,NM_007028,ENST00000372550,NM_012245,NM_172139,NM_012216,NM_012210,NM_005082,NM_182983,NM_005053,NM_005038,NM_005034,NM_018833,NM_005022,NM_006532,NM_006510,NM_006519,NM_000938,NM_006435,N…	true	0.0996533	0.00529473
negative regulation of establishment of protein localization to plasma membrane(GO:0090005)	15	29	NM_004383,NM_012249,NM_020399,NM_006330,NM_006243,NM_130830,NM_138370,NM_022152,NM_001003954,NM_138794,NM_138578,NM_017933,NM_177423,NM_003626,NM_004872	true	-0.308478	0.00531146
regulation of protein K63-linked ubiquitination(GO:1900044)	6	12	NM_004238,NM_017670,NM_015278,NM_032789,NM_015902,NM_001166	true	0.237209	0.00532183
water transport(GO:0006833)	40	84	NM_207578,NM_014904,NM_004036,NM_020980,NM_004157,NM_012064,NM_001080467,NM_001146037,NM_020546,NM_000054,NM_198098,NM_001164761,NM_021116,NM_000492,NM_000486,NM_006953,NM_005328,NM_015270,NM_001650,NM_001651,NM_001652,NM_002736,NM_002732,NM_002735,NM_002730,NM_212472,NM_001198568,NM_080429,NM_024791,NM_033158,NM_173039,NM_001077489,NM_139247,NM_004925,NM_004663,NM_183357,NM_001114,NM_001115,NM_0…	true	-0.205704	0.00535699
inositol lipid-mediated signaling(GO:0048017)	190	503	NM_078467,NM_004235,NM_173850,NM_004252,NM_052880,NM_004322,NM_007155,NM_001204375,NM_057168,NM_019884,NM_001278160,NM_014937,NM_019851,NM_004064,NM_004056,NM_004119,NM_003005,NM_014996,NM_001174066,NM_020963,NM_020996,NM_001257206,NM_006167,NM_006180,NM_006118,NM_020864,NM_006139,NM_001039966,NM_012154,NM_012199,NM_173552,NM_173564,NM_012296,NM_020683,NM_001010931,NM_001010934,NM_012237,NM_02063…	true	-0.0992366	0.00537324
phosphatidylinositol-mediated signaling(GO:0048015)	190	503	NM_078467,NM_004235,NM_173850,NM_004252,NM_052880,NM_004322,NM_007155,NM_001204375,NM_057168,NM_019884,NM_001278160,NM_014937,NM_019851,NM_004064,NM_004056,NM_004119,NM_003005,NM_014996,NM_001174066,NM_020963,NM_020996,NM_001257206,NM_006167,NM_006180,NM_006118,NM_020864,NM_006139,NM_001039966,NM_012154,NM_012199,NM_173552,NM_173564,NM_012296,NM_020683,NM_001010931,NM_001010934,NM_012237,NM_02063…	true	-0.0992366	0.00537324
chemokine biosynthetic process(GO:0042033)	13	30	NM_021805,NM_000576,NM_000594,NM_000589,NM_000600,NM_000619,NM_001700,NM_001562,NM_001972,NM_182919,NM_002133,NM_003265,NM_003392	true	0.207315	0.00537894
positive regulation of phosphatidylinositol 3-kinase signaling(GO:0014068)	57	136	NM_173850,NM_057168,NM_004119,NM_003005,NM_001174066,NM_006167,NM_006180,NM_006118,NM_006139,NM_001039966,NM_020683,NM_001010931,NM_001010934,NM_001122772,NM_000029,NM_005045,NM_170744,NM_198400,NM_000261,NM_000222,NM_006378,NM_000207,NM_005242,NM_001018065,NM_006206,NM_005188,NM_000346,NM_001142287,NM_001005915,NM_130839,NM_000459,NM_000506,NM_000515,NM_014266,NM_005335,NM_000618,NM_000759,NM_00…	true	-0.175382	0.00539893
microtubule organizing center organization(GO:0031023)	80	241	NM_001100119,NM_014629,NM_014675,NM_014711,NM_004365,NM_004344,NM_014736,NM_007186,NM_018097,NM_001114121,NM_007300,NM_014985,NM_014984,NM_144718,NM_004182,NM_001005271,NM_001114395,NM_001005207,NM_001037738,NM_006197,NM_012124,NM_000059,NM_170724,NM_018998,ENST00000380496,NM_201626,NM_017518,NM_000297,NM_014021,NM_017668,NM_017645,ENST00000243706,NM_000430,NM_017679,NM_016262,NM_018451,NM_030808…	true	0.127623	0.00541555
regulation of protein stability(GO:0031647)	139	347	NM_004205,NM_007236,NM_007262,NM_004281,NM_004343,NM_004318,NM_057175,NM_004390,NM_001122606,NM_175871,NM_173647,ENST00000343526,NM_014911,NM_007308,NM_013995,NM_001080414,NM_001004298,NM_012158,NM_001032293,NM_012179,NM_001080513,NM_006005,NM_001278518,NM_012238,NM_012300,NM_012341,NM_000039,NM_170713,NM_006537,NM_000942,NM_018973,NM_001005735,NM_171997,NM_006332,NM_006371,NM_006354,NM_022356,NM…	true	-0.115245	0.00544842
columnar/cuboidal epithelial cell differentiation(GO:0002065)	91	160	NM_078468,NM_078469,NM_173834,NM_018055,NM_004360,NM_004322,NM_004316,NM_001267843,NM_014795,NM_019884,NM_004143,NM_006168,NM_020859,NM_021818,NM_173560,NM_001030273,NM_012391,NM_012388,NM_000965,NM_000966,NM_000168,NM_000195,NM_020375,NM_006408,ENST00000379123,NM_000275,NM_000280,NM_000259,NM_000222,NM_000209,NM_005257,NM_017617,NM_198159,NM_020156,AK127929,NM_134428,NM_021073,NM_000550,NM_00694…	true	-0.141013	0.00544919
mRNA transport(GO:0051028)	124	323	NM_018087,NM_007242,NM_007279,NM_018048,NM_001081550,NM_014740,NM_007172,NM_014827,NM_007342,NM_003017,NM_003016,NM_007362,NM_007359,NM_001278209,NM_001301085,NM_001135187,NM_024923,NM_005085,NM_020401,NM_006547,NM_006548,NM_006546,NM_006527,NM_133259,NM_017426,NM_020390,ENST00000463407,NM_017458,NM_017437,NM_006362,NM_203505,NM_014089,NM_014003,NM_020189,NM_017575,NM_006267,NM_006275,NM_005131,N…	true	0.108154	0.00545946
centriole replication(GO:0007099)	19	47	NM_014711,NM_004344,NM_007300,NM_014985,NM_144718,NM_001005207,NM_001037738,NM_018451,NM_014264,NM_018249,NM_006622,NM_015294,NM_025009,NM_015531,NM_194292,NM_001286577,NM_001042384,NM_002520,NM_001037144	true	0.191628	0.00546562
regulation of hormone secretion(GO:0046883)	214	487	NM_004291,NM_004322,NM_007117,NM_014752,NM_001267843,NM_014807,NM_001205293,NM_207578,NM_004041,ENST00000276198,NM_004075,NM_004123,NM_003020,NM_003012,NM_174889,NM_014980,NM_001178065,NM_007375,NM_003081,NM_004157,NM_001005291,NM_021928,NM_021995,NM_021969,NM_006167,NM_006168,NM_006105,NM_001039966,NM_021871,NM_173560,NM_024959,NM_007023,NM_001030273,NM_001256627,NM_012283,NM_020665,NM_012240,NM…	true	-0.0933916	0.00550781
positive regulation of pseudopodium assembly(GO:0031274)	12	18	NM_044472,NM_001039802,NM_012121,NM_000038,NM_000222,NM_005242,NM_006779,NM_002989,NM_152243,NM_001093772,NM_001838,NM_145057	true	0.21024	0.0055125
STAT protein import into nucleus(GO:0007262)	8	15	NM_000230,NM_000215,NM_005235,NM_000600,NM_005524,NM_001992,NM_001963,NM_004972	true	0.225872	0.00557491
regulation of interleukin-6-mediated signaling pathway(GO:0070103)	5	13	NM_005263,NM_001190981,NM_002828,NM_080423,NM_002184	true	0.243324	0.0056724
T-helper 17 cell lineage commitment(GO:0072540)	7	11	NM_144701,NM_006399,NM_000600,NM_016584,NM_002187,NM_002460,NM_153701	true	0.230712	0.00569508
renal system process(GO:0003014)	77	151	NM_004252,NM_001204375,ENST00000256969,NM_021995,NM_006005,NM_006587,NM_000029,NM_000043,NM_018837,NM_000906,NM_000908,NM_006500,NM_199460,NM_000934,NM_000101,NM_017415,NM_000165,NM_000196,NM_018949,ENST00000492167,NM_005242,NM_198098,NM_006200,NM_001190482,NM_001008530,NM_000498,NM_000486,NM_000518,NM_000537,NM_030774,NM_000633,NM_005328,NM_000684,NM_000686,NM_000795,NM_000778,NM_000748,NM_00075…	true	-0.15175	0.00570286
positive regulation of kinase activity(GO:0033674)	463	1132	NM_004210,NM_078467,NM_004230,NM_014685,NM_007217,NM_007240,NM_018084,NM_007262,NM_007261,NM_014674,NM_012435,NM_004295,NM_004291,NM_004287,NM_004356,NM_004333,NM_004343,NM_004304,NM_004322,ENST00000383771,NM_007155,NM_001204315,NM_014760,NM_014780,NM_007197,NM_014795,NM_057159,NM_057161,NM_018098,NM_004383,NM_001243756,NM_019884,NM_173629,NM_013388,NM_013372,NM_207578,NM_004094,NM_173660,NM_0040…	true	-0.0637062	0.00573395
epithelial tube morphogenesis(GO:0060562)	278	543	NM_014632,NM_018055,NM_018012,NM_018010,NM_001271938,NM_012431,NM_004324,NM_014751,NM_007129,NM_018190,NM_014795,NM_004390,NM_001243756,NM_001033047,NM_004087,NM_003015,NM_003012,NM_003013,NM_001178065,NM_020975,NM_003036,NM_004158,NM_001257206,NM_004143,NM_021973,NM_006167,NM_020859,NM_001005366,NM_001005333,NM_006015,NM_001256312,NM_172037,NM_024915,NM_001010926,NM_012401,NM_001122742,NM_013943…	true	-0.0816713	0.005814
translational termination(GO:0006415)	94	264	NM_007209,NM_001030001,NM_012423,NM_004294,NM_007104,NM_018094,NM_001034996,NM_001136134,NM_001136137,NM_001136136,ENST00000401695,NM_001024921,NM_005061,NM_000987,NM_000988,NM_000989,NM_000980,NM_000981,NM_000982,NM_000983,NM_000984,NM_000985,NM_000986,NM_000998,NM_000992,NM_000993,NM_000990,NM_000991,NM_000996,NM_000997,NM_000969,NM_000967,NM_000968,NM_000978,NM_000979,NM_000976,NM_000975,NM_00…	true	0.119529	0.00585108
sulfur compound metabolic process(GO:0006790)	304	804	NM_014632,NM_007255,NM_007274,NM_014654,NM_012448,NM_004267,NM_001243657,NM_004273,NM_018099,NM_004386,NM_004385,NM_173601,NM_175856,NM_173642,NM_013352,NM_019886,NM_014918,NM_004104,NM_003033,NM_014960,NM_006151,NM_006123,NM_006100,NM_174963,NM_001080454,NM_006085,NM_021814,NM_006040,NM_006041,NM_020734,NM_012140,NM_020786,NM_007001,NM_007035,NM_001242831,NM_024930,NM_012269,NM_012253,NM_012331,…	true	-0.0780606	0.00588588
resolution of meiotic recombination intermediates(GO:0000712)	10	19	NM_144998,NM_020937,NM_001017975,NM_000249,NM_005236,NM_199294,NM_001003811,NM_152764,NM_001067,NM_001068	true	0.216654	0.00591164
pyruvate metabolic process(GO:0006090)	92	311	NM_180976,NM_007265,NM_013356,NM_001242339,NM_001174097,NM_001206710,NM_021947,NM_006037,NM_020786,NM_001242699,NM_000030,NM_000034,NM_000035,NM_005036,NM_000925,NM_000108,NM_000162,NM_000175,NM_000189,NM_000284,NM_006311,NM_000208,NM_000207,NM_005276,NM_000290,NM_000289,NM_181672,NM_000298,NM_001018053,NM_019058,NM_000365,NM_006212,NM_006252,NM_018706,NM_005165,NM_001190438,NM_000507,NM_016203,N…	true	-0.138708	0.00602856
response to monosaccharide(GO:0034284)	129	215	NM_004218,NM_004322,NM_007117,NM_014807,NM_001135585,NM_014904,NM_004041,NM_004064,NM_007345,NM_004123,NM_003018,NM_174889,NM_001178065,NM_003039,NM_001005291,NM_021969,NM_021957,NM_006168,NM_001039966,NM_024945,NM_001034116,NM_001256627,NM_020665,NM_207042,NM_001024847,NM_000040,NM_000963,NM_201589,NM_000944,NM_000101,NM_006424,NM_000162,NM_000164,NM_000165,NM_020365,NM_021784,NM_000230,NM_00020…	true	-0.117952	0.0060854
heme transport(GO:0015886)	8	16	NM_004299,NM_014053,NM_000412,NM_000613,NM_005689,NM_017842,NM_017791,NM_004827	true	0.224884	0.00611805
mature B cell differentiation(GO:0002335)	9	16	NM_000022,NM_005178,NM_018463,NM_006785,NM_138410,NM_173174,NM_004951,NM_145285,NM_002305	true	-0.367304	0.00615922
negative regulation of glucocorticoid receptor signaling pathway(GO:2000323)	7	19	NM_001267843,NM_004075,NM_001030273,NM_021117,NM_002634,NM_004898,NM_002616	true	-0.40046	0.00617218
cardioblast differentiation(GO:0010002)	24	59	NM_014693,NM_013372,NM_000192,NM_005257,NM_017617,NM_001098210,NM_005631,NM_005612,NM_203284,NM_005994,NM_001166175,NM_001904,NM_001191323,NM_153026,NM_033131,NM_002052,NM_001146312,NM_003238,NM_153604,NM_003181,NM_003131,NM_032331,NM_002230,NM_002202	true	-0.252195	0.00618155
neuron-neuron synaptic transmission(GO:0007270)	122	250	NM_004211,NM_001030013,NM_014619,NM_014718,NM_007184,NM_014932,NM_007327,NM_007308,NM_020919,NM_003038,NM_003042,NM_021911,NM_021956,NM_001080421,NM_020795,ENST00000008876,NM_012324,ENST00000380573,NM_000021,NM_000067,NM_005045,NM_181874,NM_000963,NM_000910,NM_000916,NM_000930,NM_000113,NM_020309,NM_018977,NM_001185091,NM_017551,NM_006377,NM_005228,NM_000314,NM_133445,NM_006226,NM_138994,NM_00119…	true	-0.120921	0.00618629
neutrophil mediated killing of bacterium(GO:0070944)	5	5	NM_007275,NM_000265,NM_005242,NM_018643,NM_001911	true	0.242176	0.00632259
neutrophil mediated cytotoxicity(GO:0070942)	5	6	NM_007275,NM_000265,NM_005242,NM_018643,NM_001911	true	0.242176	0.00632259
neutrophil mediated killing of symbiont cell(GO:0070943)	5	6	NM_007275,NM_000265,NM_005242,NM_018643,NM_001911	true	0.242176	0.00632259
regulation of integrin-mediated signaling pathway(GO:2001044)	10	32	NM_001257389,NM_022334,ENST00000360635,NM_001424,NM_001343,NM_002742,NM_001903,NM_001978,NM_001048183,NM_004763	true	-0.35293	0.00633917
maintenance of protein localization in endoplasmic reticulum(GO:0035437)	10	18	NM_030816,NM_005347,NM_006854,NM_006849,NM_006812,NM_006801,NM_005313,NM_016657,NM_002088,NM_003801	true	-0.352812	0.00636334
endocardial cushion formation(GO:0003272)	12	23	NM_004329,NM_003068,NM_000118,NM_017617,NM_005359,NM_014571,NM_203284,NM_001166220,NM_033163,NM_001040708,NM_002448,NM_002449	true	-0.329825	0.00642653
alditol catabolic process(GO:0019405)	7	15	NM_000167,ENST00000267814,NM_033214,NM_001039547,NM_001083112,NM_003104,NM_001205019	true	0.229263	0.00652405
benzene-containing compound metabolic process(GO:0042537)	23	51	NM_004059,NM_001010982,NM_012205,NM_000940,NM_000102,NM_000349,NM_016228,NM_001008661,NM_016308,NM_000781,NM_000779,NM_005651,NM_052956,NM_199292,NM_000849,NM_000848,NM_194294,NM_001145526,NM_002164,NM_146421,NM_003679,NM_002080,NM_001032998	true	0.181539	0.00653692
regulation of ossification(GO:0030278)	160	355	NM_001178133,NM_001034852,NM_004364,NM_004329,NM_004396,NM_013372,NM_014918,NM_001033047,NM_003012,NM_003013,NM_003068,NM_003036,NM_004143,NM_004179,NM_021973,NM_006157,NM_001032280,NM_006037,NM_006006,NM_012118,NM_001010931,NM_001010934,NM_020648,NM_020638,NM_001024736,NM_001271893,NM_000024,NM_000038,NM_020429,NM_001190839,NM_000900,NM_000958,NM_001024630,NM_000165,NM_000168,NM_006378,NM_020248…	true	-0.105427	0.0065378
meiotic chromosome separation(GO:0051307)	11	22	NM_144998,NM_020937,NM_001017975,NM_138804,NM_000249,NM_005236,NM_199294,NM_001003811,NM_152764,NM_001067,NM_001068	true	0.211726	0.00660003
lens morphogenesis in camera-type eye(GO:0002089)	18	29	NM_003036,NM_005029,NM_005210,NM_014290,NM_005413,NM_022740,NM_005986,NM_015480,NM_002763,NM_001649,NM_002697,NM_001904,NM_144628,NM_003108,NM_003106,NM_002398,NM_001202,NM_004431	true	-0.281529	0.00661179
putrescine catabolic process(GO:0009447)	5	9	NM_207128,NM_207127,NM_133491,NM_002970,NM_152911	true	0.241544	0.00670623
granulocyte migration(GO:0097530)	80	161	NM_007261,NM_001037341,NM_004054,NM_004072,NM_004106,NM_013447,NM_004139,NM_020820,NM_006113,NM_020672,NM_001271749,NM_207032,NM_012398,NM_005026,NM_018890,NM_000958,NM_000928,NM_000211,NM_018643,NM_000331,NM_006274,NM_006273,NM_156039,ENST00000006053,NM_148910,NM_001142343,NM_000502,NM_005408,NM_005428,NM_005337,NM_000576,NM_000589,NM_000584,NM_000619,NM_000632,NM_001098213,NM_005621,NM_002995,N…	true	0.125227	0.00671252
positive regulation of corticosteroid hormone secretion(GO:2000848)	6	24	NM_000756,NM_001480,NM_001718,NM_198594,NM_015973,NM_003182	true	0.234728	0.00672507
positive regulation of lipase activity(GO:0060193)	94	235	NM_007121,NM_057159,NM_207578,NM_004036,NM_013427,NM_007314,NM_001174066,NM_004157,NM_006125,NM_006056,NM_001122742,NM_020546,ENST00000380573,NM_000029,NM_006572,NM_000042,NM_005020,NM_000928,NM_000924,NM_000125,NM_000142,NM_000139,NM_000222,NM_005228,NM_020167,NM_001003683,NM_006206,NM_005184,NM_006254,NM_001164761,NM_134442,NM_170604,NM_001136001,NM_000482,NM_000483,NM_000450,NM_021116,NM_00540…	true	-0.135559	0.00673809
negative regulation of developmental growth(GO:0048640)	34	61	NM_014683,NM_018014,NM_004263,NM_001080395,NM_019884,NM_004114,NM_003061,NM_004186,NM_006080,NM_020532,NM_000142,NM_017514,NM_005259,NM_005215,NM_001164741,NM_030753,NM_022893,NM_153370,NM_005977,NM_005954,NM_003966,NM_138559,NM_198545,NM_033131,NM_015973,NM_003565,NM_003885,NM_004935,NM_001040058,NM_004822,NM_004787,NM_001202,NM_001234,NM_003392	true	-0.215564	0.00674704
regulation of phosphoprotein phosphatase activity(GO:0043666)	30	67	NM_007261,NM_004274,NM_014840,NM_014931,NM_020958,NM_012301,NM_000368,NM_005184,NM_058237,NM_054014,NM_054033,NM_021117,NM_005337,NM_006888,NM_000686,NM_000795,NM_001164160,NM_000801,NM_001743,NM_032844,NM_152902,NM_002111,NM_178001,NM_004972,NM_181501,NM_003299,NM_001031800,NM_153610,NM_002609,NM_002480	true	-0.227496	0.00675753
axon cargo transport(GO:0008088)	34	71	NM_012437,NM_001204303,NM_004181,NM_001271667,NM_207012,NM_012388,NM_012310,NM_000430,NM_000454,NM_000484,NM_030808,NM_201280,NM_006803,NM_015074,NM_018366,NM_032623,NM_005829,NM_183416,NM_212550,NM_177977,NM_002111,NM_003632,NM_177417,NM_003664,NM_001001342,NM_001261826,NM_001244008,NM_001199323,NM_003119,NM_183040,NM_004644,NM_001284,NM_181054,NM_001163	true	-0.215432	0.00678577
viral life cycle(GO:0019058)	316	873	NM_014688,NM_007209,NM_001030001,NM_012423,NM_004356,NM_004335,NM_007104,NM_001081550,NM_007122,NM_014761,NM_007192,NM_001206491,NM_014788,NM_001034996,NM_004396,ENST00000425020,NM_001080391,NM_013374,NM_007362,NM_007375,NM_003073,NM_003072,NM_003064,NM_004161,NM_001136134,NM_001136137,NM_001136136,NM_004128,NM_001278209,NM_134323,NM_021974,NM_006187,NM_001278714,NM_020857,NM_006139,NM_001080466,…	true	0.0707745	0.0068664
negative regulation of leukocyte activation(GO:0002695)	101	238	NM_004232,NM_007261,NM_007268,NM_012452,NM_052891,NM_052890,NM_004346,NM_004327,NM_144949,NM_004090,NM_004087,NM_004119,NM_003019,NM_003012,NM_144717,NM_173799,NM_021913,NM_021962,NM_021958,NM_001039966,NM_012179,NM_001030288,NM_012265,NM_020651,NM_172140,NM_001024736,NM_005091,NM_000043,NM_000051,NM_000168,NM_000193,NM_020393,NM_000215,NM_005246,NM_005214,NM_014009,NM_000311,NM_001004354,NM_0062…	true	-0.130638	0.00690685
regulation of NIK/NF-kappaB signaling(GO:1901222)	25	70	NM_004295,NM_006068,ENST00000373670,NM_000029,NM_198189,NM_005118,NM_000459,NM_006785,NM_014550,NM_021138,NM_015278,NM_024110,NM_002759,NM_001569,NM_138700,NM_053023,NM_003844,NM_003842,NM_001135652,NM_003270,NM_003265,NM_145803,NM_003188,NM_002377,NM_001276	true	0.177306	0.00691001
cellular response to toxic substance(GO:0097237)	18	33	NM_004064,NM_003047,NM_005080,ENST00000330233,NM_000911,NM_000102,NM_000349,NM_198207,NM_005347,NM_000781,NM_001311,NM_001964,NM_024420,NM_145804,NM_213600,NM_002397,NM_004562,NM_032409	true	-0.280276	0.00692029
negative regulation of response to biotic stimulus(GO:0002832)	26	80	NM_001037499,NM_134323,NM_021805,NM_001033557,NM_012237,NM_005007,NM_006355,NM_006290,NM_000417,NM_021231,NM_025195,NM_024119,NM_002775,NM_002759,NM_002706,NM_001548,NM_015650,NM_031483,NM_177968,NM_024544,NM_001282144,NM_001135652,NM_003270,NM_001212,NM_002343,NM_001198	true	0.175575	0.00692668
urogenital system development(GO:0001655)	277	548	NM_007214,NM_014625,NM_007289,NM_018012,NM_014714,NM_004324,NM_004311,NM_014751,NM_144997,NM_004390,NM_004098,NM_004064,NM_001033047,NM_004087,NM_003012,NM_020975,NM_003052,NM_004158,NM_001257206,NM_004143,NM_006167,NM_174936,NM_020856,NM_001005333,NM_001032280,NM_012182,NM_006006,NM_001080508,NM_006005,NM_172037,NM_020630,NM_001010926,NM_001122742,NM_012301,NM_000029,ENST00000330233,NM_000038,NM…	true	-0.0801126	0.00693096
chiasma assembly(GO:0051026)	9	31	NM_025259,NM_001131034,NM_182852,NM_001003811,NM_194439,NM_002441,NM_002440,NM_003176,NM_003337	true	0.218927	0.0069838
granulocyte chemotaxis(GO:0071621)	74	147	NM_001037341,NM_004054,NM_004072,NM_004106,NM_013447,NM_004139,NM_020820,NM_006113,NM_020672,NM_001271749,NM_207032,NM_012398,NM_005026,NM_018890,NM_000928,NM_000211,NM_018643,NM_000331,NM_006274,NM_006273,NM_156039,ENST00000006053,NM_148910,NM_001142343,NM_005408,NM_005428,NM_005337,NM_000576,NM_000589,NM_000584,NM_000619,NM_000632,NM_001098213,NM_005621,NM_002995,NM_002991,NM_002989,NM_002986,N…	true	0.128245	0.00701616
cell volume homeostasis(GO:0006884)	16	39	NM_019594,NM_004034,NM_003044,NM_005072,NM_006598,NM_000145,NM_147204,NM_198098,NM_014189,NM_000486,NM_001950,NM_001046,NM_001286,NM_001293,NM_002250,NM_002247	true	-0.293116	0.00703651
negative regulation of glucose import(GO:0046325)	11	29	NM_019884,NM_006208,NM_198184,NM_018445,NM_000594,NM_018368,NM_016459,NM_002737,NM_017933,NM_001001555,NM_003768	true	-0.33778	0.00703778
positive regulation of lymphocyte migration(GO:2000403)	21	53	NM_006419,NM_006273,NM_000609,NM_013258,NM_199168,NM_002995,NM_002989,NM_002963,NM_001565,NM_173174,NM_001123041,NM_003824,NM_003820,NM_178518,NM_001123396,NM_003183,NM_001033886,NM_004591,NM_001110,NM_001109,NM_003392	true	0.184542	0.00705795
mesonephric epithelium development(GO:0072163)	86	173	NM_018012,NM_001033047,NM_004087,NM_003012,NM_020975,NM_004158,NM_001257206,NM_004143,NM_020856,NM_001005333,NM_000029,NM_000965,NM_006522,NM_017420,NM_000168,NM_000193,NM_006317,NM_001164617,NM_020248,NM_005251,NM_000296,NM_000297,NM_133468,NM_001002295,NM_000346,NM_001190468,NM_001009944,NM_000503,NM_000514,NM_018490,NM_005454,NM_005450,NM_005430,NM_030761,NM_005359,NM_000610,NM_000633,NM_02297…	true	-0.140542	0.00708686
mesonephric tubule development(GO:0072164)	86	173	NM_018012,NM_001033047,NM_004087,NM_003012,NM_020975,NM_004158,NM_001257206,NM_004143,NM_020856,NM_001005333,NM_000029,NM_000965,NM_006522,NM_017420,NM_000168,NM_000193,NM_006317,NM_001164617,NM_020248,NM_005251,NM_000296,NM_000297,NM_133468,NM_001002295,NM_000346,NM_001190468,NM_001009944,NM_000503,NM_000514,NM_018490,NM_005454,NM_005450,NM_005430,NM_030761,NM_005359,NM_000610,NM_000633,NM_02297…	true	-0.140542	0.00708686
protein localization to chromatin(GO:0071168)	15	23	NM_001017420,NM_018649,NM_000321,NM_006265,NM_018486,NM_005322,NM_006666,NM_015045,NM_080668,NM_001166422,NM_001166419,NM_138610,NM_138414,NM_152892,NM_004456	true	0.19847	0.00710912
regulation of attachment of spindle microtubules to kinetochore(GO:0051988)	11	33	NM_018098,NM_044472,NM_001039802,NM_012237,NM_000038,NM_006461,NM_018715,NM_013277,NM_001142761,NM_031966,NM_002497	true	0.210823	0.00716008
positive regulation of receptor biosynthetic process(GO:0010870)	9	24	NM_006044,NM_012235,NM_014255,NM_019102,NM_019113,NM_005693,NM_001955,NM_004964,NM_181054	true	0.218615	0.007184
caveola assembly(GO:0070836)	5	18	NM_007229,NM_001753,NM_001184970,NM_001234,NM_001233	true	-0.441974	0.0071905
muscle cell development(GO:0055001)	141	302	NM_019618,NM_001256012,NM_014707,NM_052843,NM_004272,NM_004274,NM_014757,ENST00000334082,NM_019884,NM_001136271,NM_003030,NM_003036,NM_004181,NM_001267550,NM_020702,NM_006063,NM_006037,NM_012259,NM_020634,NM_000029,NM_000069,NM_000070,NM_000944,NM_017420,NM_000256,NM_000232,NM_006395,NM_006393,NM_018688,NM_001127184,NM_000366,NM_170707,NM_006206,NM_017617,NM_000346,NM_005159,NM_181783,NM_147188,N…	true	-0.110779	0.00720264
positive regulation of interleukin-6 secretion(GO:2000778)	6	11	NM_005242,NM_000474,NM_013258,NM_176821,NM_001992,NM_033158	true	0.233941	0.00722995
positive regulation of tyrosine phosphorylation of Stat3 protein(GO:0042517)	25	63	NM_144701,NM_021803,NM_001010926,NM_000142,NM_000163,NM_000222,NM_000230,NM_005211,NM_018724,NM_000515,NM_000565,NM_000600,NM_000605,NM_000614,NM_013246,NM_001190981,NM_005524,NM_016584,NM_001093772,NM_002184,NM_002187,NM_004972,NM_004750,NM_002309,NM_002202	true	0.176748	0.00724878
positive regulation of cAMP biosynthetic process(GO:0030819)	66	145	NM_001278497,NM_019888,NM_019884,NM_006180,NM_001039966,NM_020683,NM_001267609,NM_182978,NM_000025,NM_000024,NM_000054,NM_000960,NM_000164,NM_000267,NM_000233,NM_006366,NM_006367,NM_001018065,NM_000315,NM_005184,NM_005100,NM_021081,NM_000529,NM_130806,NM_006888,NM_000677,NM_000675,NM_000676,NM_000684,NM_000794,NM_000798,NM_000756,NM_000823,NM_005502,NM_001265587,NM_005795,NM_005854,NM_005855,NM_0…	true	-0.158624	0.00726381
ER to Golgi vesicle-mediated transport(GO:0006888)	57	176	NM_007218,NM_012430,NM_004287,NM_007126,NM_013392,NM_013388,NM_014866,NM_014946,NM_004161,NM_021982,NM_001080435,NM_001033503,NM_000037,NM_006555,NM_020477,NM_020399,NM_006323,NM_006364,NM_021633,NM_018467,NM_016209,NM_030805,NM_030799,NM_006827,NM_006815,NM_005638,NM_016146,NM_016106,NM_021210,NM_005542,NM_005570,NM_030981,NM_001012511,NM_005868,NM_023075,NM_001201584,NM_016492,NM_001077207,NM_0…	true	-0.169526	0.00733571
regionalization(GO:0003002)	311	502	NM_173849,NM_007212,NM_018076,NM_018055,NM_018008,NM_018010,NM_001271938,NM_012476,NM_004329,NM_004316,NM_019558,NM_014795,NM_019885,NM_013330,NM_013372,NM_004098,NM_004097,NM_014918,NM_173689,NM_004083,NM_007358,NM_003012,NM_003013,NM_001174146,NM_020909,NM_003036,NM_004185,NM_004186,NM_021926,NM_006195,NM_006167,NM_006168,NM_001039958,NM_001005366,NM_173533,NM_006079,NM_006080,NM_012182,NM_0060…	true	-0.0750453	0.00743204
attachment of spindle microtubules to kinetochore(GO:0008608)	25	66	NM_004217,NM_018098,NM_044472,NM_006101,NM_001032293,NM_001039802,NM_012237,NM_000038,NM_198393,NM_006461,NM_170589,NM_000321,NM_018715,NM_013277,NM_001098507,NM_001142761,NM_001015878,NM_001007793,NM_031966,NM_001012410,NM_001013437,NM_031216,NM_004725,NM_002497,NM_032436	true	0.176452	0.00743424
negative regulation of T cell differentiation in thymus(GO:0033085)	5	10	NM_001454,NM_002181,NM_139239,NM_001202,NM_032494	true	-0.440779	0.00743441
regulation of phospholipase activity(GO:0010517)	96	241	NM_057159,NM_207578,NM_004036,NM_013427,NM_007308,NM_007314,NM_007313,NM_007366,NM_001174066,NM_004157,NM_006125,NM_006056,NM_001122742,NM_020546,ENST00000380573,NM_000029,NM_006572,NM_005020,NM_000928,NM_000924,NM_000125,NM_000142,NM_000139,NM_000222,NM_005228,NM_020167,NM_001003683,NM_000310,NM_006206,NM_005184,NM_006254,NM_005157,NM_001164761,NM_134442,NM_170604,NM_001136001,NM_000483,NM_00045…	true	-0.13236	0.00757785
mesoderm development(GO:0007498)	107	238	NM_004235,NM_018055,NM_012481,NM_004329,NM_173689,NM_003013,NM_003004,NM_020909,NM_012090,NM_012082,NM_001039958,NM_001080424,NM_006079,NM_006060,NM_020648,NM_012242,NM_020634,ENST00000359999,NM_000061,NM_000127,NM_000193,NM_000212,NM_000213,NM_005251,NM_005244,NM_001003652,NM_022454,NM_018670,NM_006237,NM_001002292,NM_014159,ENST00000261396,NM_181832,NM_000401,NM_133376,NM_016269,NM_000479,NM_01…	true	-0.125566	0.00764388
proteoglycan metabolic process(GO:0006029)	90	179	NM_007255,NM_014654,NM_052872,NM_004273,NM_004386,NM_004385,NM_173601,NM_175856,NM_013352,NM_019886,NM_014918,NM_006123,NM_006040,NM_006041,NM_007015,NM_012269,NM_130468,NM_006574,NM_018837,NM_000127,NM_022467,NM_000199,NM_022569,NM_198427,NM_133507,NM_001164617,NM_000203,NM_005250,NM_018641,NM_018659,NM_019015,NM_000401,NM_054025,NM_000521,NM_000520,NM_018413,NM_000618,NM_018590,NM_013227,NM_030…	true	-0.136268	0.00767199
neural nucleus development(GO:0048857)	68	170	NM_004209,NM_004347,NM_004316,NM_014866,NM_007365,NM_001037494,NM_044472,NM_021964,NM_001039802,NM_012237,NM_017412,NM_022491,NM_006317,NM_005271,NM_005184,NM_006271,NM_005169,NM_021629,NM_001003703,NM_000402,NM_005347,NM_000633,NM_006888,NM_006826,NM_148900,NM_000693,NM_000748,NM_006761,NM_014491,NM_005596,NM_000898,NM_005566,NM_005522,NM_022757,NM_032531,NM_032538,NM_025189,NM_023035,NM_032727,…	true	-0.155379	0.00769883
potassium ion transmembrane transport(GO:0071805)	157	401	NM_001037329,NM_172362,NM_172347,NM_172375,NM_001278344,NM_001034837,NM_004274,NM_018112,NM_013348,NM_001256214,NM_019842,NM_001257291,NM_013434,NM_004137,NM_001112741,NM_001159704,NM_001130849,NM_020897,NM_001204269,NM_020697,NM_012282,NM_012281,NM_012284,NM_012283,NM_012285,NM_001135106,NM_172109,NM_172201,NM_182983,NM_000087,NM_181840,NM_001035003,NM_171828,NM_199424,NM_170736,NM_170741,NM_198…	true	-0.104296	0.00771075
cellular potassium ion transport(GO:0071804)	157	401	NM_001037329,NM_172362,NM_172347,NM_172375,NM_001278344,NM_001034837,NM_004274,NM_018112,NM_013348,NM_001256214,NM_019842,NM_001257291,NM_013434,NM_004137,NM_001112741,NM_001159704,NM_001130849,NM_020897,NM_001204269,NM_020697,NM_012282,NM_012281,NM_012284,NM_012283,NM_012285,NM_001135106,NM_172109,NM_172201,NM_182983,NM_000087,NM_181840,NM_001035003,NM_171828,NM_199424,NM_170736,NM_170741,NM_198…	true	-0.104296	0.00771075
DNA topological change(GO:0006265)	9	50	NM_000122,NM_052963,NM_002128,NM_002129,NM_003935,NM_001067,NM_001068,NM_003286,NM_004618	true	0.217794	0.00773227
positive regulation of cell development(GO:0010720)	192	467	NM_004210,NM_004230,NM_007284,NM_018014,NM_001271938,NM_012428,NM_004333,NM_004343,NM_004309,NM_004322,NM_004316,NM_007148,NM_018136,NM_014780,ENST00000392133,NM_013366,NM_173689,NM_003030,NM_020909,NM_003078,NM_044472,NM_001271534,NM_020820,NM_021975,NM_006168,NM_006180,NM_020851,NM_001039966,NM_020703,NM_021871,NM_001039802,NM_001037954,NM_012245,NM_012210,NM_012342,NM_000039,ENST00000359999,NM…	true	-0.0944766	0.00777846
organ formation(GO:0048645)	47	94	NM_004329,NM_021973,NM_006079,NM_172037,NM_001024847,NM_006593,NM_000044,NM_000168,NM_000193,NM_000192,NM_005257,NM_005247,NM_022454,NM_018670,NM_017617,NM_001190468,NM_000503,NM_005450,NM_022970,NM_001098210,NM_021192,NM_005524,NM_005523,NM_080647,NM_015170,NM_005982,NM_002729,NM_001904,NM_024426,NM_003990,ENST00000359354,NM_033163,NM_002006,NM_181458,NM_003923,NM_003722,NM_213647,NM_175605,NM_0…	true	-0.183823	0.00778372
regulation of immature T cell proliferation in thymus(GO:0033084)	5	11	NM_000193,NM_014009,NM_005180,NM_002181,NM_001202	true	-0.438986	0.00781344
positive regulation of interleukin-6 production(GO:0032755)	36	71	NM_019618,NM_018064,NM_052813,NM_004106,NM_004139,NM_006092,NM_017442,NM_000576,NM_000565,NM_000594,NM_000600,NM_013258,NM_000676,NM_014440,NM_005874,NM_016562,NM_002754,NM_001162383,NM_022162,NM_182919,NM_138554,NM_002156,NM_003854,NM_001199198,NM_003821,NM_003811,NM_003264,NM_003265,NM_004723,NM_002468,NM_033439,NM_001117,NM_002202,NM_003353,NM_003326,NM_003392	true	0.159731	0.00782058
tyrosine phosphorylation of Stat3 protein(GO:0042503)	36	90	NM_144701,NM_021803,NM_001010926,NM_020530,NM_000142,NM_000163,NM_000222,NM_000230,NM_005246,NM_005211,NM_018724,NM_181832,NM_181831,NM_000515,NM_014225,NM_000565,NM_000600,NM_000605,NM_000614,NM_013246,NM_001190981,NM_052962,NM_005524,NM_016584,NM_001093772,NM_002828,NM_002715,NM_080423,NM_002184,NM_002187,NM_181310,NM_004972,NM_003745,NM_004750,NM_002309,NM_002202	true	0.159704	0.00783814
inositol phosphate catabolic process(GO:0071545)	8	18	NM_019892,NM_000314,NM_014214,NM_006703,NM_005536,NM_001144879,NM_175732,NM_004686	true	0.222099	0.00788809
negative regulation of macroautophagy(GO:0016242)	8	14	NM_020375,NM_000271,NM_000546,NM_021020,NM_001126118,NM_001042432,NM_004958,NM_178564	true	-0.374595	0.00789642
establishment or maintenance of epithelial cell apical/basal polarity(GO:0045197)	16	41	NM_173689,NM_001039876,NM_000037,ENST00000359999,NM_020477,NM_020335,NM_018695,NM_021120,NM_015210,NM_001014795,NM_002740,NM_198859,NM_001039469,NM_004747,NM_004609,NM_001265	true	-0.289805	0.00789665
epithelial cell proliferation(GO:0050673)	274	581	NM_018055,NM_018046,NM_018010,NM_012461,NM_018105,NM_004360,NM_004324,NM_004329,NM_004322,NM_014751,NM_007178,NM_057168,NM_004093,NM_014909,NM_004064,NM_004050,NM_004087,NM_013409,NM_003012,NM_003013,NM_003068,NM_020839,NM_020800,NM_006167,NM_006142,NM_006147,NM_001005333,NM_006072,NM_012186,NM_021818,NM_001080508,NM_020761,NM_001271749,NM_001122742,NM_001122772,NM_001017967,NM_000042,NM_182983,N…	true	-0.0792235	0.00791735
paraxial mesoderm morphogenesis(GO:0048340)	9	17	NM_004329,NM_005251,NM_001003652,NM_016269,NM_001453,NM_005902,NM_205842,NM_033131,NM_002111	true	-0.359132	0.00795646
positive regulation of osteoclast differentiation(GO:0045672)	21	35	NM_144701,NM_172212,NM_172210,NM_000067,NM_133263,NM_005252,NM_134442,NM_001008495,NM_000594,NM_000619,NM_000757,NM_005655,NM_080721,NM_016584,NM_003701,NM_002187,NM_002190,NM_001077490,NM_033012,NM_145803,NM_001295	true	0.18313	0.00796541
forebrain development(GO:0030900)	331	633	NM_004209,NM_173849,NM_018058,NM_001256012,NM_018008,NM_012476,NM_004347,NM_004360,NM_004324,NM_004329,NM_004316,NM_018136,NM_014795,NM_173648,NM_173636,NM_014866,NM_004098,NM_004097,NM_004044,NM_001136271,NM_013435,NM_004114,NM_014962,NM_007365,NM_003061,NM_003036,NM_020999,NM_001037494,NM_044472,NM_004185,NM_004171,NM_021913,NM_021920,NM_006197,NM_021964,NM_006186,NM_006180,NM_001080461,NM_0011…	true	-0.072059	0.00804972
carboxylic acid biosynthetic process(GO:0046394)	298	779	NM_007262,NM_007274,NM_007283,NM_004265,NM_007121,NM_014754,NM_018196,ENST00000377854,NM_004391,NM_004386,NM_004385,NM_173642,NM_013352,NM_013328,NM_013358,NM_001037582,NM_014905,NM_004044,NM_004059,NM_013406,NM_013402,NM_004104,NM_007300,NM_007365,NM_001206710,NM_004172,NM_004169,NM_173467,NM_021947,NM_012084,NM_174917,NM_006093,NM_021814,NM_006066,NM_020734,NM_001256310,NM_172037,NM_001242831,E…	true	-0.0758684	0.00805085
organic acid biosynthetic process(GO:0016053)	298	779	NM_007262,NM_007274,NM_007283,NM_004265,NM_007121,NM_014754,NM_018196,ENST00000377854,NM_004391,NM_004386,NM_004385,NM_173642,NM_013352,NM_013328,NM_013358,NM_001037582,NM_014905,NM_004044,NM_004059,NM_013406,NM_013402,NM_004104,NM_007300,NM_007365,NM_001206710,NM_004172,NM_004169,NM_173467,NM_021947,NM_012084,NM_174917,NM_006093,NM_021814,NM_006066,NM_020734,NM_001256310,NM_172037,NM_001242831,E…	true	-0.0758684	0.00805085
aging(GO:0007568)	198	428	NM_078467,NM_007214,NM_007289,NM_004329,NM_004343,NM_057168,NM_001099412,NM_001099436,NM_001114121,NM_014840,NM_014909,NM_173685,NM_013402,NM_007313,NM_007366,NM_003054,NM_004136,NM_004171,NM_001005291,NM_001037738,NM_021994,NM_021975,NM_021947,NM_001135168,NM_001030273,NM_012235,NM_012239,NM_012238,NM_012215,NM_172201,NM_001146041,NM_001024847,ENST00000380573,NM_000029,NM_000025,NM_000022,NM_020…	true	-0.0925895	0.00810749
regulation of tyrosine phosphorylation of STAT protein(GO:0042509)	53	116	NM_144701,NM_004119,NM_021803,NM_172140,NM_001010926,NM_000142,NM_000163,NM_000222,NM_000230,NM_005235,NM_005211,NM_018724,NM_181832,NM_181831,NM_000442,NM_000515,NM_014225,NM_005335,NM_005356,NM_000565,NM_000589,NM_000588,NM_000586,NM_000600,NM_000605,NM_000619,NM_000618,NM_000614,NM_000613,NM_013246,NM_000799,NM_000758,NM_001190981,NM_052962,NM_000882,NM_005524,NM_016584,NM_001093772,NM_001753,…	true	0.141715	0.00812099
positive regulation of fibroblast migration(GO:0010763)	8	23	NM_021995,NM_005400,NM_000660,NM_001014796,NM_001978,NM_004874,NM_003246,ENST00000367922	true	-0.373654	0.00812221
regulation of single stranded viral RNA replication via double stranded DNA intermediate(GO:0045091)	8	19	NM_021822,NM_181773,NM_000584,NM_001006666,NM_145298,NM_001067,NM_003483,NM_152426	true	0.221702	0.0081714
peptide hormone secretion(GO:0030072)	214	472	NM_004218,NM_007269,NM_001030005,NM_004291,NM_004322,NM_007117,NM_014752,NM_001267843,NM_014807,NM_001205293,NM_207578,NM_014904,NM_004041,NM_004122,NM_004123,NM_003012,NM_174889,NM_014980,NM_001178065,NM_007375,NM_003081,NM_003054,NM_004161,NM_004157,NM_001005291,NM_021928,NM_021995,NM_021969,NM_006168,NM_006105,NM_001039966,NM_021871,NM_173560,NM_024959,NM_007023,NM_001030273,NM_001256627,NM_01…	true	-0.0888229	0.00834214
chondrocyte development(GO:0002063)	21	29	NM_014918,NM_003030,NM_003013,NM_001024847,NM_018837,NM_000966,NM_001024630,NM_000346,NM_018413,NM_013227,NM_016626,NM_015170,NM_032888,NM_017813,NM_198551,NM_003862,NM_004836,NM_002449,NM_004655,NM_001204,NM_002379	true	-0.258347	0.00835044
negative regulation of transferase activity(GO:0051348)	268	687	NM_007207,NM_007236,NM_014634,NM_007262,NM_007261,NM_007271,NM_012479,NM_052880,NM_004346,NM_144949,NM_001114091,NM_007199,NM_014814,NM_004383,NM_004375,NM_019884,NM_001278160,NM_014885,NM_013366,NM_013367,NM_078626,NM_004090,NM_014906,NM_004064,ENST00000394884,NM_007313,NM_004124,NM_003015,NM_003012,NM_003013,NM_020972,NM_004159,NM_004157,NM_175918,NM_175932,NM_004181,NM_001037738,NM_134323,NM_0…	true	-0.0795279	0.00836794
positive regulation of steroid hormone secretion(GO:2000833)	8	29	NM_006167,NM_020415,NM_000756,NM_001480,NM_001718,NM_198594,NM_015973,NM_003182	true	0.221336	0.00843983
meiotic gene conversion(GO:0006311)	5	11	NM_000251,NM_020227,NM_001131034,NM_001003811,NM_194439	true	0.238995	0.00845473
gene conversion(GO:0035822)	5	11	NM_000251,NM_020227,NM_001131034,NM_001003811,NM_194439	true	0.238995	0.00845473
negative regulation of metaphase/anaphase transition of cell cycle(GO:1902100)	44	126	NM_001100119,NM_004336,NM_001114091,NM_014885,NM_013366,NM_013367,ENST00000394884,NM_001032293,NM_001258213,NM_000038,NM_000051,NM_198393,NM_022662,NM_017489,NM_006341,NM_020232,NM_014042,NM_181801,NM_016237,NM_016238,NM_005372,NM_001142522,NM_016343,NM_016309,NM_001098507,NM_016141,NM_001007793,NM_032775,NM_182625,NM_003550,NM_001078645,NM_139286,NM_003292,NM_004725,NM_032147,NM_004661,NM_001211…	true	0.149687	0.00846812
negative regulation of alkaline phosphatase activity(GO:0010693)	5	12	NM_182983,NM_006378,NM_001142287,NM_000594,NM_003238	true	-0.436042	0.00846977
odontogenesis(GO:0042476)	111	183	NM_004324,NM_004329,NM_013409,NM_001256182,NM_003052,NM_021973,NM_001032280,NM_001258248,NM_000038,NM_000067,NM_000089,NM_000088,NM_006522,NM_001024630,NM_000168,NM_000193,NM_000259,NM_000210,NM_000213,NM_198056,NM_005270,NM_198098,NM_020223,NM_005220,NM_017565,NM_006206,NM_000335,NM_020127,NM_022336,NM_181832,NM_156039,NM_017680,NM_016269,NM_058238,NM_000478,NM_000474,NM_006963,NM_013275,NM_0229…	true	-0.121789	0.00849749
regulation of heart contraction(GO:0008016)	149	343	NM_001256022,NM_001037341,NM_001243812,NM_004318,NM_001099404,NM_019888,NM_019884,ENST00000256969,NM_001256214,NM_004113,NM_020971,NM_003047,NM_001005291,NM_021995,NM_174934,NM_006080,NM_006037,NM_001204218,NM_012282,NM_012283,NM_020683,NM_012259,NM_207032,NM_172201,ENST00000278947,ENST00000380573,NM_000022,NM_018896,NM_006541,NM_006514,NM_199460,NM_000152,NM_000165,NM_000256,NM_000258,NM_000257,…	true	-0.105665	0.0085106
microtubule bundle formation(GO:0001578)	35	74	NM_004210,NM_007236,NM_018174,ENST00000372165,NM_014946,NM_007044,NM_007030,NM_012263,NM_001010892,NM_020443,NM_006269,NM_014289,NM_018249,NM_016140,NM_015072,NM_005733,NM_015210,NM_031885,NM_015282,NM_001199867,NM_032636,NM_002956,NM_080860,NM_005909,NM_031417,NM_024867,NM_024806,NM_015715,NM_003611,NM_152732,NM_175605,NM_002374,NM_152327,NM_003337,NM_033513	true	-0.207241	0.00859484
response to glucose(GO:0009749)	118	199	NM_004218,NM_004322,NM_007117,NM_014807,NM_014904,NM_004041,NM_004064,NM_007345,NM_004123,NM_003018,NM_174889,NM_001178065,NM_001005291,NM_021969,NM_021957,NM_006168,NM_001039966,NM_024945,NM_001034116,NM_001256627,NM_020665,NM_207042,NM_001024847,NM_000040,NM_201589,NM_000944,NM_000101,NM_000162,NM_000164,NM_000165,NM_020365,NM_021784,NM_000209,NM_000201,NM_021724,NM_000298,NM_023928,NM_000314,N…	true	-0.118053	0.00862307
hormone secretion(GO:0046879)	250	550	NM_004218,NM_007269,NM_001030005,NM_004291,NM_004322,NM_007117,NM_014752,NM_001267843,NM_014807,NM_001205293,NM_207578,NM_014904,NM_004041,ENST00000276198,NM_004075,NM_004122,NM_004123,NM_003020,NM_003012,NM_174889,NM_014980,NM_001178065,NM_007375,NM_003081,NM_003054,NM_004161,NM_004157,NM_001005291,NM_021928,NM_021995,NM_021969,NM_006167,NM_006168,NM_006105,NM_001039966,NM_021871,NM_012193,NM_17…	true	-0.0819524	0.00863518
kidney interstitial fibroblast differentiation(GO:0072071)	8	10	NM_005251,NM_017617,NM_005524,NM_001613,NM_001025109,NM_001773,NM_145260,NM_002608	true	-0.370911	0.00880984
cellular response to arsenic-containing substance(GO:0071243)	8	22	NM_000375,NM_199054,NM_005729,NM_182491,NM_001356,NM_002133,NM_004832,NM_183239	true	0.220792	0.00885122
cellular response to ethanol(GO:0071361)	5	9	NM_006273,NM_005400,NM_033285,NM_001114,NM_002223	true	-0.434398	0.00885533
morphogenesis of a branching epithelium(GO:0061138)	173	307	NM_012431,NM_004360,NM_004324,NM_004390,NM_001243756,NM_001033047,NM_004087,NM_003012,NM_003013,NM_001178065,NM_004158,NM_001257206,NM_004143,NM_006167,NM_001005333,NM_006080,NM_172037,NM_001010931,NM_001010934,NM_001122742,NM_013943,NM_001024847,NM_000029,NM_006572,NM_000044,NM_006522,NM_001024629,NM_000926,NM_000118,NM_017420,NM_000168,NM_000193,NM_022475,NM_020335,NM_021784,NM_000245,NM_001164…	true	-0.0977462	0.00888069
regulation of cytokine-mediated signaling pathway(GO:0001959)	91	250	NM_173843,NM_007121,NM_007199,NM_001206491,NM_004031,NM_007355,NM_007365,NM_003062,NM_021913,NM_021805,NM_020746,NM_007065,NM_012293,NM_012275,NM_182965,NM_000039,NM_017414,NM_018965,NM_001005781,NM_006411,NM_006412,NM_001017368,NM_005263,NM_005242,NM_000416,NM_000430,NM_001288837,NM_021057,NM_021068,NM_005419,NM_030776,NM_021002,NM_133631,NM_000605,NM_000619,NM_000613,NM_000629,NM_013258,NM_0056…	true	0.11621	0.00890619
regulation of cyclic nucleotide biosynthetic process(GO:0030802)	113	284	NM_052847,NM_004274,NM_007102,NM_001204375,NM_001278497,NM_019888,NM_019884,NM_019839,NM_006180,NM_001039966,NM_001204218,NM_020683,NM_001267609,NM_182978,NM_000025,NM_000024,NM_000054,NM_181874,NM_000960,NM_000906,NM_000908,NM_000910,NM_006496,NM_000164,ENST00000394237,NM_000267,NM_000233,NM_006366,NM_006367,NM_023915,NM_001018065,NM_000315,NM_005184,NM_005166,NM_198184,NM_005100,NM_005459,NM_00…	true	-0.119996	0.00893454
striated muscle cell development(GO:0055002)	133	283	NM_019618,NM_001256012,NM_014707,NM_052843,NM_004272,NM_004274,NM_014757,ENST00000334082,NM_019884,NM_001136271,NM_003030,NM_003036,NM_004181,NM_001267550,NM_020702,NM_006063,NM_006037,NM_012259,NM_020634,NM_000029,NM_000069,NM_000070,NM_000944,NM_017420,NM_000256,NM_000232,NM_006395,NM_006393,NM_018688,NM_001127184,NM_000366,NM_170707,NM_006206,NM_017617,NM_000346,NM_005159,NM_181783,NM_147188,N…	true	-0.110828	0.00901013
regulation of cell cycle G1/S phase transition(GO:1902806)	127	380	NM_078467,NM_014614,NM_019606,NM_018124,NM_014814,NM_004064,NM_003072,NM_004159,NM_175932,NM_173491,NM_001159704,NM_012179,NM_024900,NM_001204186,NM_001083956,NM_000051,NM_005047,NM_006503,NM_018955,NM_017495,NM_017553,NM_001287439,NM_000297,NM_022457,NM_000314,NM_000321,NM_006263,NM_021627,NM_148976,NM_000546,NM_014241,NM_006904,NM_005427,NM_016399,NM_021009,NM_000633,NM_013263,NM_006814,NM_0529…	true	-0.113268	0.00904469
regulation of dephosphorylation(GO:0035303)	121	287	NM_001172173,NM_007236,NM_007261,NM_018040,NM_014647,NM_172365,NM_001243646,NM_004274,NM_014811,NM_014840,NM_014931,NM_020958,NM_020949,NM_006110,NM_001080476,NM_001080429,NM_001080434,NM_012125,NM_012301,NM_182983,NM_006532,NM_133263,NM_001079514,NM_020340,NM_001005741,NM_006378,NM_021733,NM_170589,NM_133448,NM_017575,NM_000368,NM_006243,NM_005184,NM_001142287,NM_006254,NM_058237,NM_054014,NM_02…	true	-0.115855	0.00909564
regulation of skeletal muscle cell proliferation(GO:0014857)	8	16	NM_175875,NM_000193,NM_001127184,NM_005982,NM_001202519,NM_003879,NM_002479,NM_001146	true	0.220465	0.0091066
chemokine metabolic process(GO:0050755)	16	33	NM_021805,NM_018643,NM_000349,NM_000576,NM_000594,NM_000589,NM_000600,NM_000619,NM_000781,NM_001700,NM_001562,NM_001972,NM_182919,NM_002133,NM_003265,NM_003392	true	0.192864	0.00916326
regulation of synaptic transmission, GABAergic(GO:0032228)	25	51	NM_001030013,NM_007184,NM_014932,NM_003042,NM_020795,ENST00000380573,NM_000067,NM_000916,NM_006226,NM_138994,NM_005400,NM_005343,NM_000795,NM_022832,NM_000863,NM_000830,NM_177977,NM_001841,NM_001042492,NM_033304,NM_002524,NM_003182,NM_003165,NM_033360,NM_004521	true	-0.237799	0.00918122
actin-mediated cell contraction(GO:0070252)	58	148	NM_019619,NM_001037341,NM_001278344,NM_007127,NM_001099404,NM_020909,NM_003047,NM_079420,NM_017533,NM_017534,NM_000256,NM_000258,NM_000257,NM_198056,NM_000366,NM_000364,NM_000363,NM_000335,NM_005159,NM_000432,NM_133379,NM_133378,NM_005406,NM_001164507,NM_000684,NM_206819,NM_000702,NM_018222,NM_000891,NM_152263,NM_001018004,NM_001018005,NM_002667,NM_001927,NM_001042780,NM_002052,NM_001043351,NM_00…	true	-0.16371	0.00920807
toxin transport(GO:1901998)	29	43	NM_018163,NM_004052,NM_207627,NM_003060,NM_012073,NM_006015,NM_012244,NM_006584,NM_006585,NM_006431,NM_006430,NM_006429,NM_181715,NM_014143,NM_021082,NM_016213,NM_005347,NM_030752,NM_006632,NM_005998,NM_001762,NM_002841,NM_005925,NM_001539,NM_182728,NM_003264,NM_002336,NM_001040446,NM_001120	true	-0.223062	0.00923987
caveolin-mediated endocytosis(GO:0072584)	10	30	NM_007229,NM_144707,NM_005148,NM_138957,NM_001165978,NM_015166,NM_001753,NM_001144967,NM_001184970,NM_001234	true	-0.34088	0.0092583
transmembrane receptor protein serine/threonine kinase signaling pathway(GO:0007178)	291	726	NM_014694,NM_019619,NM_018055,NM_001178138,NM_001271938,NM_004257,NM_052872,NM_004329,NM_007111,NM_004313,NM_144997,NM_007178,NM_007085,NM_001243756,NM_013372,NM_173689,NM_013409,NM_007313,NM_003012,NM_003013,NM_003036,NM_020997,NM_173798,NM_004143,NM_006156,NM_021951,NM_006116,NM_021809,NM_006079,NM_001130955,NM_001080500,NM_020770,NM_173209,NM_012245,NM_012238,NM_020648,NM_012242,NM_020634,NM_0…	true	-0.0753348	0.00931028
proline biosynthetic process(GO:0006561)	9	35	NM_013328,NM_001113475,NM_170726,NM_000274,NM_006907,NM_002860,NM_023078,NM_003748,NM_153824	true	-0.353869	0.0093261
embryonic limb morphogenesis(GO:0030326)	107	185	NM_018083,NM_001271938,NM_004324,NM_004329,NM_004380,NM_019885,ENST00000394967,NM_007353,NM_003030,NM_003013,NM_003036,NM_021926,NM_021973,NM_001032280,NM_006006,NM_172037,NM_024915,NM_012242,NM_000021,NM_001113347,NM_000965,NM_000966,NM_001024630,NM_006492,NM_017409,NM_000165,NM_000168,NM_000193,NM_000192,NM_018951,NM_001164617,NM_014053,NM_005221,NM_022458,NM_133433,NM_017617,NM_016269,NM_01627…	true	-0.122504	0.0093277
embryonic appendage morphogenesis(GO:0035113)	107	185	NM_018083,NM_001271938,NM_004324,NM_004329,NM_004380,NM_019885,ENST00000394967,NM_007353,NM_003030,NM_003013,NM_003036,NM_021926,NM_021973,NM_001032280,NM_006006,NM_172037,NM_024915,NM_012242,NM_000021,NM_001113347,NM_000965,NM_000966,NM_001024630,NM_006492,NM_017409,NM_000165,NM_000168,NM_000193,NM_000192,NM_018951,NM_001164617,NM_014053,NM_005221,NM_022458,NM_133433,NM_017617,NM_016269,NM_01627…	true	-0.122504	0.0093277
metaphase plate congression(GO:0051310)	22	39	NM_018101,ENST00000394884,NM_144718,NM_000249,NM_005261,NM_000321,NM_016343,NM_080668,NM_032636,NM_031966,NM_015169,NM_017884,NM_001813,NM_017785,NM_001013437,NM_031216,NM_031217,NM_003550,NM_003590,NM_004724,NM_004661,NM_032436	true	0.179181	0.00937287
synaptonemal complex assembly(GO:0007130)	18	53	NM_004237,NM_012447,NM_006455,NM_014258,NM_001143764,NM_001105578,NM_001282718,NM_001282717,NM_001003811,NM_031275,NM_031271,NM_001040108,NM_001129979,NM_033025,NM_032132,NM_001123225,NM_003176,NM_004639	true	0.187648	0.0094059
RNA catabolic process(GO:0006401)	229	599	NM_007209,NM_014681,NM_001030001,NM_012423,NM_004286,NM_018109,NM_007104,NM_014740,NM_018149,NM_014772,NM_007080,NM_018094,NM_001034996,NM_004397,NM_175854,NM_013316,NM_013354,NM_014871,NM_014953,NM_014943,NM_014912,NM_001257281,NM_004111,NM_007362,NM_007359,NM_173797,NM_001136134,NM_001136137,NM_001136136,NM_001080449,NM_012154,NM_012199,ENST00000401695,NM_012118,NM_001024921,NM_012255,ENST00000…	true	0.0787918	0.00941292
lipid particle organization(GO:0034389)	15	32	NM_014613,NM_001256412,NM_001080472,NM_001172435,NM_012233,NM_020440,NM_005038,NM_020376,NM_021130,NM_021252,NM_001013706,NM_032667,NM_022094,NM_203402,NM_144628	true	-0.291837	0.00944763
response to molecule of bacterial origin(GO:0002237)	213	442	NM_007207,NM_014633,NM_018064,NM_001037341,NM_012448,NM_052813,NM_004271,NM_004345,NM_004327,NM_007199,NM_004048,NM_144701,NM_007308,NM_007313,NM_004120,NM_003018,NM_001174104,NM_003005,NM_001037499,NM_004143,NM_004139,NM_207315,NM_021913,NM_021975,NM_021962,NM_021947,NM_021805,ENST00000314940,NM_006068,NM_012118,NM_020672,NM_001278548,NM_001278547,NM_020661,NM_020651,NM_012237,NM_020529,NM_00500…	true	0.0813018	0.00945749
body morphogenesis(GO:0010171)	49	85	NM_012482,NM_004318,NM_001099412,NM_001256182,NM_003036,NM_001172435,NM_012233,NM_012242,NM_000088,NM_006439,NM_022469,NM_001164617,NM_014053,NM_005221,NM_133433,NM_017660,NM_006206,NM_006270,NM_016269,NM_005450,NM_013275,NM_000660,NM_030753,NM_030756,NM_018262,NM_001142620,NM_080647,NM_080646,NM_005765,NM_025129,NM_002834,NM_205842,NM_016952,NM_001286778,NM_001184717,NM_002181,NM_003611,NM_00107…	true	-0.176235	0.009482
cell differentiation involved in kidney development(GO:0061005)	43	92	NM_014625,NM_014751,NM_020856,NM_012301,NM_005044,NM_000168,NM_000193,NM_006317,NM_005251,NM_014079,NM_017617,NM_001002295,NM_006236,NM_018490,NM_030761,NM_000619,NM_001098210,NM_005524,NM_001454,NM_001282971,NM_001613,NM_001025109,NM_030667,NM_001904,NM_024426,NM_003990,NM_001773,NM_001145850,NM_016932,NM_139266,NM_003870,NM_004998,NM_145260,NM_003206,NM_002608,NM_004797,NM_004646,NM_002397,NM_0…	true	-0.186829	0.00954042
rhythmic synaptic transmission(GO:0060024)	5	8	NM_020549,NM_018977,NM_000314,NM_023035,NM_001955	true	0.237605	0.00955427
regulation of protein binding(GO:0043393)	121	271	NM_004217,NM_014685,NM_007262,NM_018058,NM_012437,NM_004295,NM_004324,NM_004313,NM_019854,NM_004041,NM_007314,NM_020909,NM_003064,NM_006167,NM_006037,NM_001278548,NM_001278547,NM_207191,NM_207197,NM_013945,NM_012342,NM_012341,NM_000024,NM_000021,NM_198282,NM_001024629,NM_022469,NM_017488,NM_017482,NM_006325,NM_000281,NM_020248,NM_000296,NM_019023,NM_006226,NM_006254,NM_014189,NM_021627,NM_022334,…	true	-0.115093	0.00957754
regulation of phosphatidylinositol 3-kinase signaling(GO:0014066)	70	163	NM_004235,NM_173850,NM_004252,NM_052880,NM_057168,NM_004119,NM_003005,NM_001174066,NM_006167,NM_006180,NM_006118,NM_006139,NM_001039966,NM_173552,NM_020683,NM_001010931,NM_001010934,NM_001122772,NM_000029,NM_005045,NM_170744,NM_198400,NM_006311,NM_000261,NM_000222,NM_006378,NM_000207,NM_005242,NM_001018065,NM_000314,NM_006206,NM_005188,NM_000346,NM_001142287,NM_001005915,NM_130839,NM_000474,NM_00…	true	-0.149216	0.00961161
response to immune response of other organism involved in symbiotic interaction(GO:0052564)	7	10	NM_007275,NM_000660,NM_002759,NM_001636,NM_001135652,NM_003264,NM_002343	true	0.224691	0.00981029
response to host immune response(GO:0052572)	7	10	NM_007275,NM_000660,NM_002759,NM_001636,NM_001135652,NM_003264,NM_002343	true	0.224691	0.00981029
cellular polysaccharide metabolic process(GO:0044264)	132	366	NM_014683,ENST00000342645,NM_014791,NM_014805,NM_001034954,NM_001099436,NM_019884,NM_014840,NM_004130,NM_001244710,NM_021957,NM_001278548,NM_001278547,NM_001135044,NM_000028,NM_006482,NM_000127,NM_017431,NM_000152,NM_000151,NM_000162,NM_000160,NM_000158,NM_018946,NM_018955,NM_018960,NM_001258459,NM_000221,NM_000208,NM_000207,NM_021724,NM_000292,NM_000294,NM_018686,NM_000315,NM_017572,NM_006208,NM…	true	-0.109992	0.00983095
positive regulation of phospholipase C activity(GO:0010863)	75	176	NM_057159,NM_207578,NM_004036,NM_013427,NM_007314,NM_001174066,NM_004157,NM_006125,NM_006056,NM_001122742,NM_020546,ENST00000380573,NM_000029,NM_005020,NM_000924,NM_000125,NM_000139,NM_000222,NM_005228,NM_001003683,NM_006206,NM_005184,NM_006254,NM_001164761,NM_134442,NM_170604,NM_001136001,NM_000450,NM_021116,NM_005400,NM_201282,NM_201283,NM_006888,NM_000707,NM_000706,NM_005683,NM_000867,NM_00554…	true	-0.14405	0.00983368
putrescine metabolic process(GO:0009445)	7	12	NM_207128,NM_207127,NM_133491,NM_002970,NM_024758,NM_152911,NM_002539	true	0.22464	0.00985287
branch elongation involved in ureteric bud branching(GO:0060681)	5	17	NM_001257206,NM_017420,NM_000800,NM_005982,NM_001202	true	-0.430004	0.00995701
branching involved in ureteric bud morphogenesis(GO:0001658)	54	118	NM_001033047,NM_004087,NM_004158,NM_001257206,NM_004143,NM_001005333,NM_000029,NM_006522,NM_017420,NM_000168,NM_000193,NM_001164617,NM_020248,NM_000297,NM_000346,NM_001190468,NM_000503,NM_000514,NM_018490,NM_005450,NM_005430,NM_030761,NM_005359,NM_000610,NM_000633,NM_000660,NM_000686,NM_001098210,NM_005631,NM_021192,NM_000800,NM_005560,NM_014587,NM_005523,NM_001014795,NM_002968,NM_005982,NM_00263…	true	-0.167517	0.00998164
fatty acid beta-oxidation using acyl-CoA oxidase(GO:0033540)	11	30	NM_001243745,NM_001257363,NM_000414,NM_001007098,NM_014324,NM_021151,NM_001167595,NM_002979,NM_001607,NM_003500,NM_003501	true	-0.326364	0.0100807
negative regulation of ruffle assembly(GO:1900028)	6	10	NM_001025616,NM_016337,NM_153186,NM_053024,NM_001256877,NM_002353	true	-0.404268	0.0101042
cyclic nucleotide biosynthetic process(GO:0009190)	139	366	NM_052847,NM_004274,NM_007102,NM_001204375,NM_001278497,NM_019888,NM_019884,NM_019839,NM_004037,ENST00000276198,NM_004036,NM_006172,NM_006180,NM_001039966,NM_001204218,NM_020683,NM_001267609,NM_020546,NM_182978,NM_000025,NM_000024,NM_000054,NM_181874,NM_000960,NM_000906,NM_000908,NM_000910,NM_006496,NM_000164,NM_000180,ENST00000394237,NM_000267,NM_000233,NM_006366,NM_006367,NM_198098,NM_023915,NM…	true	-0.106884	0.0101122
negative regulation of growth(GO:0045926)	197	472	NM_078467,NM_001256053,AJ271790,NM_014683,NM_018014,NM_004263,NM_052863,NM_004345,NM_004335,NM_004307,NM_014755,NM_144997,NM_001080395,NM_019884,NM_078626,NM_014915,NM_004064,NM_004114,NM_003012,NM_003013,NM_003072,NM_003062,NM_003061,NM_004139,NM_004186,NM_001159704,NM_173475,NM_001130845,NM_006172,NM_001004298,NM_006098,NM_006080,NM_001256312,NM_024949,NM_024900,NM_012238,NM_207191,NM_207197,NM…	true	-0.0902	0.0101199
negative regulation of canonical Wnt signaling pathway(GO:0090090)	88	204	NM_004360,NM_019884,NM_013372,NM_001206885,NM_004083,NM_003015,NM_003014,NM_003012,NM_003013,NM_003068,NM_001206998,NM_001080512,NM_001080508,NM_001256312,NM_001242811,NM_012242,NM_001270519,NM_005067,NM_000038,NM_000168,NM_000193,NM_006341,NM_001164617,ENST00000394123,NM_005269,NM_022454,NM_018670,NM_017617,NM_000346,NM_016269,NM_006941,NM_014240,NM_005450,NM_030761,NM_030756,NM_014425,NM_014421…	true	-0.133011	0.0101558
eye development(GO:0001654)	281	501	NM_004235,NM_014617,NM_001256012,NM_014714,NM_012476,NM_001034853,NM_001034852,NM_004366,NM_004324,NM_057168,NM_175875,NM_014874,NM_057093,NM_004087,NM_173728,NM_013435,NM_001174146,NM_003072,NM_003078,NM_020975,NM_020989,NM_003036,NM_001112704,NM_004148,NM_004185,NM_001271534,NM_006193,NM_012064,NM_021955,NM_001256412,NM_001172435,NM_001005366,NM_001032280,NM_012186,NM_012193,NM_006059,NM_006060…	true	-0.0757162	0.0102015
cellular response to electrical stimulus(GO:0071257)	9	19	NM_003047,NM_006160,NM_000329,NM_199165,NM_005612,NM_015537,NM_004999,NM_002579,NM_001126	true	-0.35078	0.010215
regulation of macrophage chemotaxis(GO:0010758)	10	21	NM_004054,NM_004072,NM_001142343,NM_002982,NM_002889,NM_001735,NM_002843,NM_173174,NM_003246,NM_001001924	true	0.210408	0.0102681
cellular polysaccharide biosynthetic process(GO:0033692)	103	303	NM_014683,ENST00000342645,NM_014791,NM_014805,NM_001034954,NM_001099436,NM_019884,NM_014840,NM_004130,NM_001244710,NM_021957,NM_001278548,NM_001278547,NM_001135044,NM_000028,NM_006482,NM_000127,NM_017431,NM_000162,NM_000158,NM_018946,NM_018955,NM_001258459,NM_000208,NM_000207,NM_021724,NM_000294,NM_018686,NM_000315,NM_017572,NM_006208,NM_006242,NM_005163,NM_138980,NM_000401,NM_018445,NM_005398,NM…	true	-0.123186	0.0102941
ureteric bud development(GO:0001657)	84	171	NM_018012,NM_001033047,NM_004087,NM_003012,NM_020975,NM_004158,NM_001257206,NM_004143,NM_020856,NM_001005333,NM_000029,NM_000965,NM_006522,NM_017420,NM_000168,NM_000193,NM_006317,NM_001164617,NM_020248,NM_005251,NM_000297,NM_133468,NM_001002295,NM_000346,NM_001190468,NM_000503,NM_000514,NM_018490,NM_005454,NM_005450,NM_005430,NM_030761,NM_005359,NM_000610,NM_000633,NM_022970,NM_000660,NM_000686,N…	true	-0.135697	0.0103267
membrane lipid metabolic process(GO:0006643)	166	430	NM_004204,NM_004278,NM_004324,NM_001011719,NM_019893,NM_004042,NM_013443,NM_003034,NM_020944,NM_014960,NM_003080,NM_001256126,NM_020819,NM_021996,NM_006100,NM_001080438,NM_001005377,NM_006011,NM_020755,NM_024989,NM_001010887,NM_182965,NM_000047,NM_170740,NM_000153,NM_001005741,NM_018973,ENST00000321276,NM_018941,NM_017436,NM_006415,NM_000262,NM_001004320,NM_000222,NM_198150,NM_000310,NM_000308,NM…	true	-0.0977493	0.0103589
response to lipoprotein particle(GO:0055094)	8	21	NM_001178065,NM_000271,NM_005502,NM_002982,NM_138711,NM_213602,NM_003183,NM_004599	true	0.218951	0.0103654
protein geranylgeranylation(GO:0018344)	7	12	NM_005023,NM_000390,NM_005592,NM_001821,NM_002027,NM_004582,NM_004581	true	-0.382696	0.0103695
embryonic camera-type eye development(GO:0031076)	33	66	NM_057168,NM_001005366,NM_001032280,NM_006015,NM_172037,AB031230,NM_000966,NM_000474,NM_005413,NM_000693,NM_001142620,NM_005631,NM_199292,NM_006617,NM_022740,NM_032590,NM_001452,NM_025132,NM_005994,NM_002763,NM_015650,NM_001048183,NM_003990,NM_138473,NM_002181,NM_001199042,NM_003108,NM_003111,NM_002335,NM_002336,NM_003468,NM_003392,NM_004465	true	-0.20806	0.010373
mesenchyme morphogenesis(GO:0072132)	19	35	NM_004329,NM_003068,NM_000118,NM_017617,NM_000346,NM_000474,NM_005359,NM_014571,NM_203284,NM_005994,NM_001166220,NM_033163,NM_145260,NM_001040708,NM_002467,NM_002448,NM_002449,NM_001200,NM_002202	true	-0.262779	0.0104125
cell cycle phase transition(GO:0044770)	476	1303	NM_078467,NM_004217,NM_007234,NM_014614,NM_014679,NM_014641,NM_001271933,NM_014711,NM_014708,NM_012479,NM_172375,NM_052857,NM_019606,NM_004359,NM_018124,NM_004344,NM_004336,NM_007111,ENST00000383771,NM_001114091,NM_014750,NM_018140,NM_007186,NM_014791,NM_018097,NM_014814,NM_013347,NM_013345,NM_014885,NM_013366,NM_013367,NM_078626,NM_014956,NM_004095,NM_173685,NM_004064,NM_004060,NM_004087,NM_0040…	true	0.0557596	0.0104275
embryonic body morphogenesis(GO:0010172)	9	20	NM_012482,NM_006439,NM_022469,NM_017660,NM_018262,NM_025129,NM_205842,NM_016952,NM_003611	true	-0.350014	0.010446
response to hexose(GO:0009746)	125	210	NM_004218,NM_004322,NM_007117,NM_014807,NM_001135585,NM_014904,NM_004041,NM_004064,NM_007345,NM_004123,NM_003018,NM_174889,NM_001178065,NM_003039,NM_001005291,NM_021969,NM_021957,NM_006168,NM_001039966,NM_024945,NM_001034116,NM_001256627,NM_020665,NM_207042,NM_001024847,NM_000040,NM_000963,NM_201589,NM_000944,NM_000101,NM_006424,NM_000162,NM_000164,NM_000165,NM_020365,NM_021784,NM_000209,NM_00020…	true	-0.11191	0.0105318
toll-like receptor 4 signaling pathway(GO:0034142)	104	300	NM_180976,NM_001114123,NM_004090,NM_004031,NM_001174104,NM_003010,NM_004139,NM_021975,NM_006116,NM_006092,NM_001032288,NM_006068,NM_020672,NM_001278548,NM_001278547,NM_020651,NM_001135044,NM_020529,NM_181886,NM_000061,NM_018955,NM_000211,NM_021724,NM_005252,NM_005242,NM_005229,NM_001288724,NM_005171,NM_006290,NM_138980,NM_138957,NM_134442,NM_148910,NM_005400,NM_001257168,NM_001287344,NM_021009,NM…	true	0.108421	0.0105409
nucleoside salvage(GO:0043174)	16	46	NM_012474,NM_001113756,NM_173355,NM_000194,NM_001287428,NM_001287426,NM_020200,NM_000485,NM_000788,NM_031432,NM_017859,NM_001785,NM_003258,NM_002451,NM_004614,NM_001123	true	0.191148	0.01055
lamellipodium organization(GO:0097581)	58	128	NM_018084,NM_007284,NM_007127,NM_001243756,NM_014945,NM_174878,NM_004145,NM_006113,NM_001080435,NM_012402,NM_020441,NM_018890,NM_018984,NM_000222,NM_005246,NM_198098,NM_018688,NM_001018070,NM_014000,NM_017640,NM_000412,NM_005470,NM_018462,NM_005430,NM_052995,NM_001163257,NM_006646,NM_014578,NM_005721,NM_153186,NM_001400,NM_002872,NM_001093772,NM_032876,NM_015320,NM_022130,NM_030667,NM_205842,NM_0…	true	-0.16096	0.0105542
negative regulation of cell adhesion mediated by integrin(GO:0033629)	6	10	NM_003068,NM_001010887,NM_000922,NM_000412,NM_000602,NM_002834	true	-0.402552	0.0105848
engulfment of apoptotic cell(GO:0043652)	5	9	NM_018053,NM_018890,NM_019112,NM_003246,NM_001140	true	-0.427427	0.0106531
amide transport(GO:0042886)	250	587	NM_004218,NM_019625,NM_007269,NM_001030005,NM_004291,NM_004254,NM_004252,NM_004322,NM_007117,NM_014752,NM_001267843,NM_007163,NM_014807,NM_001205293,NM_207578,NM_014904,NM_004041,ENST00000276198,NM_004063,NM_004122,NM_004123,NM_003012,NM_174889,NM_014980,NM_001178065,NM_007375,NM_003081,NM_003054,NM_004161,NM_004157,NM_001205206,NM_001005291,NM_021928,NM_021995,NM_021969,NM_006168,NM_006105,NM_00…	true	-0.079708	0.0106629
positive regulation of autophagy(GO:0010508)	34	80	NM_001271943,NM_004322,NM_007162,NM_013325,NM_014924,NM_004052,NM_014991,NM_012238,NM_006395,NM_006219,NM_006252,NM_001025300,NM_148893,NM_021202,NM_206907,NM_014521,NM_032547,NM_016628,NM_025079,NM_015315,NM_024310,NM_198578,NM_002015,NM_033285,NM_003565,NM_003900,NM_003766,NM_004872,NM_178326,NM_002572,NM_213590,NM_003169,NM_178812,NM_003369	true	-0.2045	0.0107305
sodium ion transport(GO:0006814)	197	527	NM_001204404,NM_007236,NM_018057,NM_018018,NM_012450,NM_004252,NM_007124,NM_001099404,ENST00000374086,ENST00000374084,NM_173653,NM_001011547,NM_001011554,NM_001011552,NM_001256214,NM_019848,NM_004087,NM_001257291,NM_004113,NM_020922,NM_144699,NM_003059,NM_020971,NM_003060,NM_003049,NM_020987,NM_003047,NM_003048,NM_003052,NM_003041,NM_004174,NM_174934,NM_001039960,NM_020897,NM_001080442,NM_173515,…	true	-0.0894438	0.0107777
NK T cell differentiation(GO:0001865)	6	8	NM_006060,NM_006006,NM_001024847,NM_005546,NM_001261826,NM_003328	true	-0.401605	0.0108579
regulation of vacuole organization(GO:0044088)	10	21	NM_020773,NM_020775,NM_000252,NM_014169,NM_006913,NM_030981,NM_031296,NM_002536,NM_004637,NM_175605	true	-0.335528	0.0108662
anterior/posterior pattern specification(GO:0009952)	192	275	NM_007212,NM_018055,NM_018008,NM_004329,NM_019558,NM_014795,NM_004098,NM_173689,NM_004083,NM_003012,NM_003013,NM_020909,NM_003036,NM_021926,NM_006195,NM_006167,NM_001039958,NM_001005366,NM_173533,NM_012182,NM_006006,NM_001080508,NM_024989,NM_012259,NM_012242,NM_020634,AB031230,NM_000038,NM_021570,ENST00000359999,NM_000021,NM_000051,NM_000966,NM_022658,NM_001024613,NM_017410,NM_017409,NM_000168,NM…	true	-0.0904739	0.0108666
striated muscle contraction(GO:0006941)	112	278	NM_001037341,NM_052862,NM_004272,NM_004318,NM_001099404,ENST00000334082,NM_003047,NM_174934,NM_079420,NM_006063,NM_006037,NM_001204218,NM_173201,NM_012282,ENST00000278947,ENST00000380573,NM_000034,NM_000069,NM_006514,NM_199460,NM_000152,NM_000256,NM_000258,NM_000257,NM_000238,NM_000218,NM_198056,NM_001128175,NM_000290,NM_000366,NM_000363,NM_006218,NM_000335,NM_005184,NM_005159,NM_198236,NM_000432…	true	-0.117465	0.0108901
mesonephros development(GO:0001823)	90	184	NM_018012,NM_001033047,NM_004087,NM_003012,NM_020975,NM_004158,NM_001257206,NM_004143,NM_020856,NM_001005333,NM_006006,NM_000029,NM_000965,NM_006522,NM_017420,NM_000168,NM_000193,NM_006317,NM_001164617,NM_020248,NM_005251,NM_000296,NM_000297,NM_133468,NM_001002295,NM_000346,NM_001190468,NM_001009944,NM_000503,NM_000514,NM_018490,NM_000537,NM_005454,NM_005450,NM_005430,NM_030761,NM_005359,NM_00061…	true	-0.130352	0.0109279
T cell activation involved in immune response(GO:0002286)	65	142	NM_172350,NM_144949,NM_144701,NM_021958,NM_134260,ENST00000373670,NM_172140,NM_001024809,NM_005092,NM_005060,NM_000021,NM_000052,NM_006509,NM_000958,NM_000201,NM_000215,NM_006399,NM_005242,NM_022367,NM_001002295,NM_005191,NM_006274,NM_005178,NM_020124,NM_000418,NM_016269,NM_000447,NM_021057,NM_021068,NM_000546,NM_005442,NM_005375,NM_000578,NM_021002,NM_000589,NM_000600,NM_000619,NM_006889,NM_1768…	true	0.128715	0.010939
myelin maintenance(GO:0043217)	8	18	NM_012307,NM_022474,NM_000314,NM_001008540,NM_000454,NM_013279,NM_001626,NM_024577	true	-0.363332	0.0109591
regulation of protein polyubiquitination(GO:1902914)	7	21	NM_004238,NM_017670,NM_015278,NM_032789,NM_015902,NM_004562,NM_001166	true	0.223331	0.0110095
regulation of canonical Wnt signaling pathway(GO:0060828)	142	340	NM_014709,NM_004360,NM_018136,NM_019884,NM_013372,NM_001206885,NM_004083,NM_003015,NM_003014,NM_003012,NM_003013,NM_003068,NM_004185,NM_001005209,NM_001206998,NM_001080512,NM_001080508,NM_001256312,NM_001242811,NM_001030273,NM_024911,NM_001037954,NM_001038633,NM_012242,NM_012395,NM_012342,NM_001270519,NM_005067,NM_000038,NM_000088,NM_000168,NM_000193,NM_006341,NM_001164617,ENST00000394123,NM_0052…	true	-0.104546	0.0110502
immune response-regulating cell surface receptor signaling pathway(GO:0002768)	325	978	NM_078467,NM_007261,NM_001178126,NM_001037341,NM_172387,NM_172390,NM_172373,NM_004324,NM_004322,NM_001030059,NM_004383,NM_019884,NM_001278160,NM_004090,NM_019851,NM_004064,NM_004054,NM_007355,NM_004106,NM_013442,NM_007313,NM_001242524,NM_003029,NM_003010,NM_001174066,NM_020963,NM_020996,NM_001257206,NM_044472,NM_001080529,NM_021983,NM_021975,NM_006153,NM_001039933,NM_006113,NM_006116,NM_006139,NM…	true	-0.0697142	0.011076
saliva secretion(GO:0046541)	11	24	NM_000912,NM_198098,NM_170685,NM_000684,NM_000740,NM_000738,NM_001651,NM_003182,NM_003154,NM_002250,NM_004465	true	-0.323228	0.0110816
cellular response to tumor necrosis factor(GO:0071356)	97	268	NM_004345,NM_001242310,NM_001033047,NM_007300,NM_003012,ENST00000252590,NM_021975,NM_006167,NM_006164,NM_001039966,NM_012238,NM_005092,NM_182965,NM_000039,NM_000088,NM_000101,NM_001005741,NM_001017368,NM_021783,NM_000224,NM_006384,NM_000201,NM_005276,NM_005242,NM_018647,NM_019006,NM_000384,NM_001002295,NM_147156,NM_016270,NM_148965,NM_000525,NM_014272,NM_030788,NM_000594,NM_000584,NM_013258,NM_01…	true	0.110748	0.0111399
fatty acid transport(GO:0015908)	63	160	NM_001136493,ENST00000256969,NM_004102,NM_007366,NM_012254,NM_005094,NM_005036,NM_000098,NM_000928,NM_000929,NM_001017372,NM_006311,NM_006358,NM_020167,NM_000387,NM_000392,NM_006238,NM_006252,NM_005163,NM_001190438,NM_001009185,NM_021077,NM_016203,NM_005399,NM_000576,NM_000686,NM_000789,NM_000795,NM_000797,NM_000778,NM_005630,NM_032551,NM_001443,NM_152246,NM_080866,NM_002758,NM_030572,NM_001626,N…	true	0.129858	0.0111723
artery development(GO:0060840)	53	118	NM_001099412,NM_021973,NM_006167,NM_012259,NM_000020,NM_000090,NM_001024629,NM_000118,NM_000168,NM_000193,NM_020338,NM_000267,NM_005251,NM_000297,NM_000384,NM_017617,NM_000503,NM_000522,NM_019074,NM_016307,NM_001142620,NM_014495,NM_000860,NM_005576,NM_005524,NM_005522,NM_080647,NM_080646,NM_203284,NM_001453,NM_005982,NM_005994,NM_002763,NM_017780,NM_001042492,NM_033163,NM_053025,NM_003923,NM_0038…	true	-0.166583	0.0111747
cell cycle arrest(GO:0007050)	234	640	NM_078467,NM_014618,NM_014614,NM_018031,BC021560,NM_004343,NM_004307,NM_007148,NM_014762,NM_001099402,NM_014814,NM_175866,NM_078626,NM_014909,NM_019845,NM_004064,NM_004083,NM_007300,NM_007313,NM_004159,NM_001206710,NM_175932,NM_006191,NM_012090,NM_006167,NM_001130849,NM_174942,NM_006147,NM_001039966,NM_006023,NM_020761,NM_012257,NM_001278518,NM_001278513,NM_012301,NM_182931,NM_000038,NM_006569,NM…	true	-0.0817945	0.0111906
response to insecticide(GO:0017085)	10	12	NM_006186,ENST00000278947,NM_000097,NM_000102,NM_000349,NM_199037,NM_000781,NM_199292,NM_031966,NM_004588	true	0.2093	0.0112547
amine metabolic process(GO:0009308)	199	495	NM_007262,NM_014614,NM_007117,NM_007169,NM_014814,NM_013391,NM_004043,NM_175839,NM_004059,NM_013406,NM_207581,NM_003080,NM_004159,NM_004152,NM_175932,NM_004179,ENST00000375105,NM_006186,NM_001080480,NM_006093,NM_007069,NM_001010982,NM_012205,NM_173353,NM_207128,NM_207127,NM_020549,NM_001242890,NM_182983,NM_000039,NM_020428,NM_000078,NM_000052,NM_000055,NM_005047,NM_005017,NM_000903,NM_006503,NM_0…	true	-0.0884155	0.0113174
monocarboxylic acid metabolic process(GO:0032787)	480	1247	NM_180976,NM_001122674,NM_001256053,NM_007262,NM_007260,NM_007265,NM_007274,NM_007283,NM_012448,NM_004265,NM_007121,NM_018196,NM_057157,ENST00000377854,NM_004391,NM_001243745,NM_004386,NM_004385,NM_019891,NM_013352,NM_019885,NM_001257363,NM_013356,NM_001037582,NM_001037537,NM_001242339,NM_004092,NM_014915,NM_019844,NM_013402,NM_004104,NM_007300,NM_004102,NM_020944,NM_001174097,NM_003059,NM_003049…	true	-0.0573679	0.0113398
positive regulation of cartilage development(GO:0061036)	9	28	ENST00000471755,NM_006006,NM_017508,NM_000346,NM_001554,NM_001200,NM_001202,NM_001199,NM_003392	true	-0.347135	0.0113509
iron coordination entity transport(GO:1901678)	10	22	NM_004299,NM_014053,NM_000412,NM_000613,NM_005689,NM_005564,NM_016609,NM_017842,NM_017791,NM_004827	true	0.209144	0.0113998
negative regulation of DNA-dependent DNA replication(GO:2000104)	10	29	NM_000057,NM_006306,NM_005445,NM_005590,NM_001281463,NM_017858,NM_017933,NM_033632,NM_032143,NM_001261	true	0.209133	0.0114102
lens induction in camera-type eye(GO:0060235)	5	7	NM_005413,NM_022740,NM_002697,NM_003106,NM_001202	true	-0.424746	0.0114184
glomerular basement membrane development(GO:0032836)	10	19	NM_000091,NM_000092,NM_018837,NM_015170,NM_024426,NM_004998,NM_002508,NM_002437,NM_004646,NM_002292	true	-0.333616	0.0114926
maturation of SSU-rRNA from tricistronic rRNA transcript (SSU-rRNA, 5.8S rRNA, LSU-rRNA)(GO:0000462)	6	16	NM_004053,NM_014503,NM_003703,NM_001022,NM_001026,NM_001024	true	0.228633	0.0114957
positive regulation of cell projection organization(GO:0031346)	185	423	NM_004210,NM_001122679,NM_173808,NM_007284,NM_018014,NM_001271938,NM_012428,NM_004309,NM_014780,NM_013366,NM_014845,NM_014932,NM_144707,NM_007314,NM_003030,NM_174878,NM_020975,NM_044472,NM_001271534,NM_006180,NM_020851,NM_020703,NM_172082,NM_001039802,NM_020738,NM_012121,NM_001135190,NM_007029,NM_001037954,NM_012249,NM_020630,NM_001024948,NM_012301,NM_005093,NM_182965,NM_006576,NM_000038,NM_02044…	true	-0.0913534	0.0115644
C-terminal protein amino acid modification(GO:0018410)	28	68	NM_004204,NM_004278,NM_001005377,NM_024989,NM_012405,NM_018973,NM_006395,NM_005482,NM_148920,NM_016309,NM_015239,NM_176787,NM_032634,NM_032785,NM_002641,NM_002643,NM_017837,NM_017733,NM_033198,NM_015937,NM_145167,NM_003859,NM_003863,NM_003801,NM_004855,NM_153681,NM_152336,NM_004569	true	-0.220513	0.0115971
negative regulation of immune system process(GO:0002683)	203	484	NM_004232,NM_007207,NM_007261,NM_007268,NM_018009,NM_012452,NM_172373,NM_052891,NM_052890,NM_004346,NM_004327,NM_004335,NM_144949,NM_004313,NM_007199,NM_013372,NM_004090,NM_004087,NM_004119,NM_003019,NM_003012,NM_007365,NM_144717,NM_173799,NM_021913,NM_134323,NM_021962,NM_021958,NM_001039966,NM_001242758,NM_012179,NM_001033557,NM_001030288,NM_012265,NM_001271749,NM_020651,NM_172140,NM_001024736,N…	true	-0.0872538	0.0116098
lacrimal gland development(GO:0032808)	7	18	NM_000966,NM_022970,NM_001007237,NM_001453,NM_001542,ENST00000359354,NM_004465	true	-0.378389	0.0116738
negative regulation of necroptotic process(GO:0060546)	7	11	NM_001162383,NM_031229,NM_003651,NM_003824,NM_004723,NM_001165,NM_001151	true	0.222592	0.011708
positive regulation of endothelial cell chemotaxis(GO:2001028)	5	19	NM_000245,NM_002742,NM_016457,NM_001540,NM_003966	true	-0.423657	0.0117415
myofibril assembly(GO:0030239)	47	105	NM_001256012,NM_052843,NM_001267550,NM_006063,NM_000070,NM_017420,NM_000256,NM_006393,NM_001127184,NM_000366,NM_006206,NM_005159,NM_000432,NM_133379,NM_133378,NM_133376,NM_014391,NM_014482,NM_021245,NM_001173408,NM_182493,NM_032578,NM_080749,NM_001018004,NM_001018005,NM_002763,NM_001202519,NM_015311,NM_001166175,NM_001955,NM_212472,NM_194293,NM_001040114,NM_001040113,NM_003879,NM_001171610,NM_003…	true	-0.174861	0.011761
polysaccharide metabolic process(GO:0005976)	143	393	NM_014683,ENST00000342645,NM_014791,NM_014805,NM_001034954,NM_001099436,NM_019884,NM_019886,NM_014840,NM_004130,NM_001244710,NM_021957,NM_001278548,NM_001278547,NM_001135044,NM_000028,NM_006482,NM_000127,NM_017431,NM_000152,NM_000151,NM_000162,NM_000160,NM_000158,NM_018946,NM_018955,NM_018960,NM_001258459,NM_000221,NM_000208,NM_000207,NM_021724,NM_000292,NM_000294,NM_018686,NM_000315,NM_017572,NM…	true	-0.103279	0.0117915
cellular response to monosaccharide stimulus(GO:0071326)	75	121	NM_004218,NM_004322,NM_014807,NM_001135585,NM_014904,NM_004041,NM_007345,NM_174889,NM_001178065,NM_003039,NM_001039966,NM_001256627,NM_020665,NM_000040,NM_000944,NM_000101,NM_021784,NM_000230,NM_000201,NM_021724,NM_023928,NM_000349,NM_014172,NM_000436,NM_016275,NM_054033,NM_000525,NM_005400,NM_005391,NM_000681,NM_030756,NM_000780,NM_000756,NM_199292,NM_021132,NM_000859,NM_000820,NM_001503,NM_0154…	true	-0.140601	0.0118577
locomotory behavior(GO:0007626)	146	237	NM_173808,NM_001277269,NM_018008,NM_018013,NM_052847,NM_052893,NM_001243812,NM_001204303,NM_007117,NM_014845,NM_001256214,ENST00000276198,NM_004123,NM_004124,NM_020919,NM_003087,NM_144697,NM_020971,NM_003054,NM_004181,NM_001271534,NM_020801,NM_006195,NM_173474,NM_006186,NM_020866,NM_012193,ENST00000253407,NM_020795,NM_020549,NM_005076,NM_020427,NM_001098834,NM_000052,NM_005029,NM_000909,NM_000910…	true	-0.102148	0.0118719
regulation of organ morphogenesis(GO:2000027)	148	291	NM_004360,NM_004329,NM_013372,NM_007314,NM_007313,NM_003015,NM_003012,NM_003013,NM_021973,NM_001005333,NM_006079,NM_001032280,NM_001206998,NM_001242811,NM_001010931,NM_001010934,NM_012242,NM_001122742,NM_012301,NM_001258248,NM_000029,NM_182983,NM_000038,NM_000044,NM_018890,NM_006522,NM_000941,NM_001024630,NM_017420,NM_001005743,NM_000193,NM_000192,NM_020335,NM_006317,NM_001164617,NM_001079675,NM_…	true	-0.101464	0.0118817
regulation of keratinocyte proliferation(GO:0010837)	20	48	NM_004093,NM_003068,NM_006142,NM_020427,NM_138938,NM_006275,NM_001017535,NM_001008387,NM_002844,NM_002742,NM_015693,NM_001793,NM_138576,NM_003688,NM_002009,NM_003722,NM_178509,NM_004774,NM_152365,NM_004465	true	-0.253453	0.0118917
cerebral cortex neuron differentiation(GO:0021895)	18	29	NM_018008,NM_004316,NM_004097,NM_005076,NM_000021,NM_000194,NM_000430,NM_030792,NM_014368,NM_000794,NM_000795,NM_022095,NM_001546,NM_015557,BC037242,NM_139058,NM_178120,NM_004405	true	-0.264614	0.0119012
protein prenylation(GO:0018342)	10	30	NM_005023,NM_000390,NM_005592,NM_001821,NM_002028,NM_002027,XM_005251976,NM_001099666,NM_004582,NM_004581	true	-0.332145	0.0119939
prenylation(GO:0097354)	10	30	NM_005023,NM_000390,NM_005592,NM_001821,NM_002028,NM_002027,XM_005251976,NM_001099666,NM_004582,NM_004581	true	-0.332145	0.0119939
glycogen biosynthetic process(GO:0005978)	48	143	NM_014805,NM_001034954,NM_019884,NM_004130,NM_001244710,NM_021957,NM_000028,NM_006482,NM_017431,NM_000162,NM_000158,NM_018955,NM_001258459,NM_000208,NM_000207,NM_021724,NM_000294,NM_000315,NM_006208,NM_006242,NM_005163,NM_018445,NM_005398,NM_021009,NM_000612,NM_000618,NM_018290,NM_006759,NM_022817,NM_005544,NM_031908,NM_002954,NM_001201329,NM_015148,NM_001626,NM_002709,NM_002633,NM_198586,NM_0021…	true	-0.172654	0.0120473
glucan biosynthetic process(GO:0009250)	48	143	NM_014805,NM_001034954,NM_019884,NM_004130,NM_001244710,NM_021957,NM_000028,NM_006482,NM_017431,NM_000162,NM_000158,NM_018955,NM_001258459,NM_000208,NM_000207,NM_021724,NM_000294,NM_000315,NM_006208,NM_006242,NM_005163,NM_018445,NM_005398,NM_021009,NM_000612,NM_000618,NM_018290,NM_006759,NM_022817,NM_005544,NM_031908,NM_002954,NM_001201329,NM_015148,NM_001626,NM_002709,NM_002633,NM_198586,NM_0021…	true	-0.172654	0.0120473
positive regulation of p38MAPK cascade(GO:1900745)	9	20	NM_000379,NM_006724,NM_006705,NM_015278,NM_005922,NM_203351,NM_001924,NM_015675,NM_001200	true	0.212566	0.0120656
adherens junction organization(GO:0034332)	111	291	NM_014634,NM_001278344,NM_004360,NM_004361,NM_007170,NM_001034954,NM_004383,NM_001243756,NM_001206885,NM_004061,NM_013427,NM_003012,NM_020909,NM_012090,NM_006125,NM_001080435,NM_012398,NM_001135000,NM_000020,NM_018890,NM_006505,NM_001005743,NM_022478,NM_000261,ENST00000394156,NM_005233,NM_014000,NM_000314,NM_000368,NM_006288,NM_018715,NM_022334,NM_000412,NM_017679,NM_016279,NM_000459,NM_005406,NM…	true	-0.116356	0.0120684
pons development(GO:0021548)	12	15	NM_004316,NM_017412,NM_005169,NM_000633,NM_014402,NM_005522,NM_023035,NM_182706,NM_002144,NM_003615,NM_003936,NM_003885	true	0.201185	0.0120818
cell migration involved in kidney development(GO:0035787)	6	8	NM_020335,NM_033023,NM_002608,NM_002609,NM_002607,NM_004797	true	-0.397462	0.01212
lagging strand elongation(GO:0006273)	7	19	NM_004111,NM_001080449,NM_000234,NM_001008537,NM_002691,NM_002311,NM_002312	true	0.222167	0.0121242
regulation of transforming growth factor beta receptor signaling pathway(GO:0017015)	93	217	NM_014694,NM_052872,NM_144997,NM_007178,NM_003036,NM_004143,NM_006079,NM_012245,NM_012238,NM_012201,NM_001037802,NM_012342,NM_001024847,NM_020429,NM_000076,NM_000118,NM_000138,NM_018955,NM_006313,NM_001003652,NM_020182,NM_133493,NM_006221,NM_017680,NM_000455,NM_000546,NM_018413,NM_130803,NM_005430,NM_005414,NM_005347,NM_005359,NM_021009,NM_014319,NM_000660,NM_014330,NM_001258024,NM_005585,NM_0529…	true	-0.126516	0.0121624
pseudopodium assembly(GO:0031269)	13	20	NM_044472,NM_001039802,NM_006063,NM_012121,NM_000038,NM_000222,NM_005242,NM_006779,NM_002989,NM_152243,NM_001093772,NM_001838,NM_145057	true	0.197784	0.0122507
regulation of pseudopodium assembly(GO:0031272)	13	19	NM_044472,NM_001039802,NM_006063,NM_012121,NM_000038,NM_000222,NM_005242,NM_006779,NM_002989,NM_152243,NM_001093772,NM_001838,NM_145057	true	0.197784	0.0122507
mesangial cell differentiation(GO:0072007)	7	9	NM_005251,NM_017617,NM_001613,NM_001025109,NM_001773,NM_145260,NM_002608	true	-0.376533	0.012275
polysaccharide biosynthetic process(GO:0000271)	111	318	NM_014683,ENST00000342645,NM_014791,NM_014805,NM_001034954,NM_001099436,NM_019884,NM_014840,NM_004130,NM_001244710,NM_021957,NM_001278548,NM_001278547,NM_001135044,NM_000028,NM_006482,NM_000127,NM_017431,NM_000162,NM_000158,NM_018946,NM_018955,NM_001258459,NM_000208,NM_000207,NM_021724,NM_000294,NM_018686,NM_000315,NM_017572,NM_006208,NM_006242,NM_005163,NM_138980,NM_001288653,NM_000401,NM_014203…	true	-0.116068	0.0122897
muscle organ development(GO:0007517)	328	682	NM_004205,NM_019618,NM_173849,ENST00000326282,NM_014707,NM_052868,NM_004272,NM_004274,NM_004326,NM_014722,NM_019593,AF006514,NM_007124,NM_057165,NM_001099401,ENST00000334082,NM_004396,NM_004369,NM_019884,NM_019885,NM_013329,NM_013372,NM_004093,NM_019851,NM_003030,NM_003036,NM_001112704,NM_021926,NM_001267550,NM_001159704,NM_021958,NM_012082,NM_001080483,NM_134269,NM_020702,NM_001278939,NM_021818,…	true	-0.0682715	0.0124609
regulation of phospholipase C activity(GO:1900274)	78	179	NM_057159,NM_207578,NM_004036,NM_013427,NM_007314,NM_007313,NM_001174066,NM_004157,NM_006125,NM_006056,NM_001122742,NM_020546,ENST00000380573,NM_000029,NM_005020,NM_000924,NM_000125,NM_000139,NM_000222,NM_005228,NM_001003683,NM_006206,NM_005184,NM_006254,NM_005157,NM_001164761,NM_134442,NM_170604,NM_001136001,NM_000450,NM_021116,NM_005400,NM_201282,NM_201283,NM_006888,NM_000707,NM_000706,NM_00568…	true	-0.136894	0.0126046
phosphatidylinositol 3-kinase signaling(GO:0014065)	91	211	NM_004235,NM_173850,NM_004252,NM_052880,NM_057168,NM_004119,NM_003005,NM_001174066,NM_006167,NM_006180,NM_006118,NM_020864,NM_006139,NM_001039966,NM_173552,NM_173564,NM_020683,NM_001010931,NM_001010934,NM_012237,NM_001122772,NM_000029,NM_005045,NM_005026,NM_170744,NM_198400,NM_000267,NM_006311,NM_000261,NM_000222,NM_006378,NM_000207,NM_001005862,NM_005242,NM_001018065,NM_000314,NM_006219,NM_00620…	true	-0.127165	0.0126414
activation of transmembrane receptor protein tyrosine kinase activity(GO:0007171)	9	39	NM_001204315,NM_013372,NM_001010848,NM_000024,NM_016205,NM_001963,NM_001191323,NM_001166694,NM_001146	true	-0.343219	0.0126821
positive regulation of protein binding(GO:0032092)	52	116	NM_014685,NM_007262,NM_004295,NM_004041,NM_007314,NM_020909,NM_012342,NM_198282,NM_001024629,NM_017488,NM_017482,NM_006325,NM_000296,NM_006226,NM_014189,NM_001002259,NM_001009944,NM_148910,NM_054014,NM_130803,NM_014247,NM_000638,NM_016302,NM_030756,NM_000759,NM_021138,NM_006622,NM_000801,NM_022740,NM_001166006,NM_001429,NM_002917,NM_015103,NM_001012398,NM_001617,NM_203342,NM_182919,NM_138455,NM_1…	true	-0.165206	0.0127469
sister chromatid cohesion(GO:0007062)	37	84	NM_004336,NM_001100399,NM_173685,NM_001100400,NM_012291,NM_006306,NM_133433,NM_000321,NM_006999,NM_018486,NM_005445,NM_001257145,NM_001098210,NM_005590,NM_052911,NM_015045,NM_015032,NM_148674,NM_080668,NM_024094,NM_182489,NM_015110,NM_015100,NM_031965,NM_001281463,NM_002876,NM_025146,NM_001904,ENST00000409203,NM_001166422,NM_001166419,NM_024834,NM_032132,NM_033632,NM_152524,NM_152510,NM_004655	true	0.152171	0.0128426
cellular glucose homeostasis(GO:0001678)	84	137	NM_004218,NM_004291,NM_004322,NM_014807,NM_014904,NM_004041,NM_007345,NM_174889,NM_001178065,NM_001039966,NM_001256627,NM_020665,NM_012238,NM_000040,NM_000944,NM_000101,NM_000162,NM_000189,NM_021784,NM_000201,NM_021724,NM_181672,NM_023928,NM_000349,NM_006267,NM_014172,NM_000436,NM_016275,NM_054033,NM_000525,NM_005400,NM_005391,NM_013261,NM_000681,NM_030756,NM_000780,NM_000756,NM_199292,NM_021132,…	true	-0.131803	0.0128529
tyrosine phosphorylation of STAT protein(GO:0007260)	57	127	NM_144701,NM_004119,NM_021803,NM_172140,NM_001010926,NM_020530,NM_000142,NM_000163,NM_000222,NM_000230,NM_000215,NM_005246,NM_005235,NM_005211,NM_018724,NM_181832,NM_181831,NM_000442,NM_000515,NM_014225,NM_005335,NM_005356,NM_000565,NM_000589,NM_000588,NM_000586,NM_000600,NM_000605,NM_000619,NM_000618,NM_000614,NM_000613,NM_013246,NM_000799,NM_000758,NM_001190981,NM_052962,NM_000882,NM_005524,NM_…	true	0.132408	0.0129923
sequestering of calcium ion(GO:0051208)	28	61	NM_001256022,NM_004343,ENST00000276198,NM_020533,NM_000053,NM_006387,NM_000297,NM_006274,NM_054033,NM_000540,NM_005400,NM_005356,NM_014417,NM_000795,NM_000867,NM_000801,NM_002995,NM_002989,NM_024103,NM_001992,NM_015525,NM_001838,NM_139075,ENST00000371951,NM_003299,NM_001035,NM_001232,NM_002222	true	-0.217218	0.013109
peptide secretion(GO:0002790)	224	489	NM_004218,NM_007269,NM_001030005,NM_004291,NM_004322,NM_007117,NM_014752,NM_001267843,NM_014807,NM_001205293,NM_207578,NM_014904,NM_004041,ENST00000276198,NM_004122,NM_004123,NM_003012,NM_174889,NM_014980,NM_001178065,NM_007375,NM_003081,NM_003054,NM_004161,NM_004157,NM_001005291,NM_021928,NM_021995,NM_021969,NM_006168,NM_006105,NM_001039966,NM_021871,NM_173560,NM_024959,NM_007023,NM_001030273,NM…	true	-0.0817324	0.013118
response to peptidoglycan(GO:0032494)	11	20	NM_052813,NM_004345,NM_007199,NM_018965,NM_001098627,NM_000600,NM_001736,NM_022162,NM_001569,NM_003821,NM_003264	true	0.203599	0.0131439
muscle tissue development(GO:0060537)	307	597	NM_004205,NM_019618,NM_001256012,NM_014707,NM_052868,NM_004272,NM_004274,NM_004326,NM_004343,NM_019593,NM_014757,ENST00000334082,NM_004396,NM_019884,NM_019885,NM_013372,NM_004093,NM_019851,NM_004087,NM_001136271,NM_003030,NM_003047,NM_003036,NM_001112704,NM_001267550,NM_021958,NM_012082,NM_020856,NM_020702,NM_001278939,NM_001080424,NM_021818,NM_006063,NM_173552,NM_006037,NM_020733,NM_006007,NM_00…	true	-0.0699887	0.0131534
regulation of metaphase/anaphase transition of cell cycle(GO:1902099)	54	154	NM_001100119,NM_004336,NM_001114091,NM_014750,NM_014885,NM_013366,NM_013367,NM_173685,ENST00000394884,NM_001032293,NM_012291,NM_001258213,NM_000038,NM_000051,NM_198393,NM_022662,NM_017489,NM_006341,NM_020232,NM_014042,NM_000314,NM_000321,NM_181801,NM_016237,NM_016238,NM_005372,NM_001142522,NM_016343,NM_016309,NM_001098507,NM_014397,NM_016141,NM_001007793,NM_015110,NM_032775,NM_001813,NM_182625,NM…	true	0.134679	0.0131687
lymphocyte migration(GO:0072676)	51	95	NM_013351,NM_057090,NM_007365,NM_020975,NM_020630,NM_001100812,NM_005026,NM_006419,NM_005290,NM_001002295,NM_000331,NM_006273,ENST00000006053,NM_005409,NM_000609,NM_006871,NM_013258,NM_199168,NM_000889,NM_000885,NM_001142797,NM_000820,NM_002995,NM_002989,NM_002982,NM_001400,NM_002963,NM_005990,NM_022059,NM_001190259,NM_001647,NM_002649,NM_001565,NM_001838,NM_016951,NM_173174,NM_001123041,NM_03305…	true	0.137249	0.0131934
tube formation(GO:0035148)	117	215	NM_018055,NM_018010,NM_004360,NM_007129,NM_014795,NM_003015,NM_003012,NM_003013,NM_020975,NM_003036,NM_020859,NM_001005366,NM_006015,NM_001256312,NM_024915,NM_001010926,NM_012401,AB031230,NM_181861,NM_005022,NM_000966,NM_006522,NM_017420,NM_017412,NM_000193,NM_020335,NM_001287438,NM_000368,NM_017660,NM_017617,NM_001002295,NM_000346,NM_198174,AK127929,NM_022334,NM_022336,NM_014159,NM_170695,NM_001…	true	-0.112036	0.0132107
phospholipid metabolic process(GO:0006644)	288	874	NM_004204,NM_014638,NM_014602,NM_007283,NM_001206670,NM_004278,NM_004356,NM_019593,NM_007155,NM_014754,NM_007169,NM_001037277,NM_001135219,NM_001080399,NM_019892,NM_014873,NM_014845,NM_014937,NM_014908,ENST00000276198,NM_004027,NM_013402,NM_013442,NM_004102,NM_001178000,NM_003080,NM_001278253,NM_001243564,NM_207328,ENST00000375105,NM_020819,NM_174936,NM_001080480,NM_001080464,NM_001005377,NM_0060…	true	-0.0721644	0.0132265
negative regulation of neurogenesis(GO:0050768)	92	159	NM_007207,NM_014683,NM_018014,NM_004263,NM_004329,NM_004309,NM_001080395,NM_014868,NM_004114,NM_001037442,NM_003061,NM_003036,NM_001112704,NM_004186,NM_006197,NM_006168,NM_006080,NM_001206999,NM_012237,NM_001010926,NM_020532,NM_000021,NM_006519,ENST00000379123,NM_017514,NM_000267,NM_000280,NM_005215,NM_000314,NM_017617,NM_001164741,NM_006288,NM_005170,NM_000506,NM_000546,NM_005450,NM_014247,NM_00…	true	-0.125659	0.013273
carnitine transport(GO:0015879)	12	34	NM_003059,NM_003060,NM_000098,NM_000387,NM_006252,NM_016203,NM_005399,NM_152246,NM_033125,NM_001093,NM_001031847,NM_002614	true	0.199987	0.0132806
amino-acid betaine transport(GO:0015838)	12	34	NM_003059,NM_003060,NM_000098,NM_000387,NM_006252,NM_016203,NM_005399,NM_152246,NM_033125,NM_001093,NM_001031847,NM_002614	true	0.199987	0.0132806
endochondral bone growth(GO:0003416)	22	28	NM_007112,NM_001024847,NM_000095,NM_000965,NM_000966,NM_000941,NM_000142,NM_017637,NM_198184,NM_005454,NM_199141,NM_001014796,NM_032888,NM_024409,NM_001851,NM_003246,NM_002449,NM_002427,NM_003155,NM_153717,NM_002379,ENST00000367922	true	-0.240189	0.0133782
face development(GO:0060324)	41	74	NM_004318,NM_001099412,NM_001256182,NM_003036,NM_001172435,NM_006007,NM_024915,NM_012233,NM_012242,NM_000088,NM_000966,NM_005221,NM_133433,NM_006206,NM_006270,NM_016269,NM_005450,NM_013275,NM_000660,NM_030756,NM_000693,NM_001142620,NM_005634,NM_000885,NM_080647,NM_080646,NM_002834,NM_017780,NM_001286778,NM_001184717,NM_003901,NM_033027,NM_001199042,NM_003239,NM_002470,NM_032199,NM_002448,NM_00100…	true	-0.18292	0.0134041
response to hepatocyte growth factor(GO:0035728)	12	26	NM_007127,NM_001178065,NM_001010931,NM_001010934,NM_012237,NM_001024629,NM_030955,NM_014567,NM_001170714,NM_003873,NM_003212,NM_004774	true	0.199856	0.0134173
cellular response to hepatocyte growth factor stimulus(GO:0035729)	12	26	NM_007127,NM_001178065,NM_001010931,NM_001010934,NM_012237,NM_001024629,NM_030955,NM_014567,NM_001170714,NM_003873,NM_003212,NM_004774	true	0.199856	0.0134173
Golgi organization(GO:0007030)	62	134	NM_078471,NM_014688,NM_018178,NM_007190,NM_014780,NM_004073,NM_007357,NM_004161,NM_044472,NM_020824,NM_001256487,ENST00000310421,NM_001080463,NM_001039802,NM_001206999,NM_020771,NM_182961,NM_001008211,NM_198490,NM_006421,NM_017510,NM_005255,NM_022374,NM_017653,NM_018714,NM_005113,NM_138957,NM_017679,NM_006827,NM_006815,NM_016040,NM_014488,ENST00000374747,NM_001173408,NM_005550,NM_005570,NM_031899…	true	-0.150941	0.0135995
positive regulation of purine nucleotide catabolic process(GO:0033123)	18	35	NM_014688,NM_014629,NM_014853,NM_006105,NM_001172435,NM_006098,NM_012233,ENST00000395358,NM_001258457,NM_005665,NM_015279,NM_001677,NM_001678,NM_001679,NM_016495,NM_015705,NM_145245,NM_144628	true	-0.260476	0.0136213
positive regulation of nucleotide catabolic process(GO:0030813)	18	35	NM_014688,NM_014629,NM_014853,NM_006105,NM_001172435,NM_006098,NM_012233,ENST00000395358,NM_001258457,NM_005665,NM_015279,NM_001677,NM_001678,NM_001679,NM_016495,NM_015705,NM_145245,NM_144628	true	-0.260476	0.0136213
pyrimidine nucleoside monophosphate biosynthetic process(GO:0009130)	14	34	NM_012474,NM_004341,NM_173355,NM_000110,NM_001287428,NM_001287426,NM_000373,NM_001025248,NM_016308,NM_031432,NM_017859,NM_145052,NM_001160301,NM_001071	true	0.193356	0.0136734
negative regulation of Ras protein signal transduction(GO:0046580)	38	90	NM_144997,NM_014874,NM_173690,NM_007314,NM_007368,ENST00000380573,NM_022481,NM_001025616,NM_000267,NM_000261,NM_133376,NM_000507,NM_006989,NM_022904,NM_006772,NM_001251902,NM_021137,NM_001105540,NM_001009552,NM_032552,NM_153186,NM_002890,NM_001006617,NM_001006618,NM_138709,NM_015894,NM_182643,NM_024767,NM_001042492,NM_001256877,NM_033304,NM_003590,NM_144606,NM_003255,NM_213622,NM_004658,NM_004491…	true	-0.188657	0.0137493
evasion or tolerance of defenses of other organism involved in symbiotic interaction(GO:0051834)	5	11	NM_000660,NM_005902,NM_002759,NM_001647,NM_001135652	true	0.233245	0.0137694
avoidance of defenses of other organism involved in symbiotic interaction(GO:0051832)	5	11	NM_000660,NM_005902,NM_002759,NM_001647,NM_001135652	true	0.233245	0.0137694
avoidance of host defenses(GO:0044413)	5	11	NM_000660,NM_005902,NM_002759,NM_001647,NM_001135652	true	0.233245	0.0137694
evasion or tolerance of host defenses(GO:0044415)	5	11	NM_000660,NM_005902,NM_002759,NM_001647,NM_001135652	true	0.233245	0.0137694
regulation of receptor-mediated endocytosis(GO:0048259)	58	132	NM_004313,NM_007166,NM_001257389,NM_013372,NM_014911,NM_004041,NM_144707,NM_003014,NM_003026,NM_014999,NM_174936,NM_001044305,NM_001038633,NM_001010938,NM_012242,NM_012407,NM_012301,NM_000040,NM_018890,NM_000310,NM_006219,NM_017651,NM_005188,NM_005148,NM_006274,NM_000483,NM_000450,NM_001165978,NM_001024227,NM_005338,NM_201278,NM_000602,NM_000638,NM_000795,NM_052968,NM_018373,NM_005781,ENST0000040…	true	-0.155431	0.0137788
regulation of ketone biosynthetic process(GO:0010566)	7	9	NM_021073,NM_030761,NM_005612,NM_001718,NM_015881,NM_003739,NM_001200	true	0.220537	0.0138332
stress-induced premature senescence(GO:0090400)	7	31	NM_078467,NM_057168,NM_007366,NM_001030273,NM_000546,NM_001126118,NM_139078	true	-0.371969	0.0138584
positive regulation of telomerase activity(GO:0051973)	6	13	NM_018081,NM_013372,NM_015450,NM_015393,NM_001191323,ENST00000316024	true	-0.392139	0.0139105
activation of innate immune response(GO:0002218)	180	561	NM_180976,NM_014602,NM_052814,NM_052813,NM_052891,NM_052890,NM_007199,NM_001206491,NM_147780,NM_001114123,NM_004090,NM_004031,NM_004079,NM_007329,NM_001174104,NM_003010,NM_004139,NM_021975,NM_006116,NM_006092,NM_001032288,NM_006068,NM_020746,NM_020672,NM_001278548,NM_001278547,NM_020651,NM_001135044,NM_020529,NM_005091,NM_006586,NM_005007,NM_181886,NM_000061,NM_198282,NM_130386,NM_001008229,NM_02…	true	0.083427	0.0139268
regulation of lipid metabolic process(GO:0019216)	206	509	NM_004235,NM_007204,NM_173850,NM_001256053,NM_012448,NM_052880,NM_004356,NM_007155,NM_007121,NM_001034954,NM_014924,NM_014915,ENST00000276198,NM_007300,NM_004119,NM_013442,NM_004102,NM_207627,NM_003068,NM_001257206,NM_001005291,NM_006113,NM_001039966,NM_001080472,NM_134260,NM_173555,NM_012125,NM_020786,NM_012235,NM_012238,NM_012240,NM_001017989,NM_173354,NM_020526,NM_005060,NM_000029,NM_000040,NM…	true	-0.0843967	0.0139741
regulation of symbiosis, encompassing mutualism through parasitism(GO:0043903)	172	486	NM_004345,NM_004335,NM_004322,NM_007192,NM_001206491,NM_014788,NM_004396,NM_001080391,NM_007362,NM_007375,NM_003073,NM_003072,NM_003064,NM_004139,NM_004128,NM_134323,NM_021974,NM_006187,NM_001278714,NM_006139,NM_001080466,NM_021822,NM_020746,NM_007028,ENST00000372550,NM_012245,NM_172139,NM_012216,NM_012210,NM_005082,NM_182983,NM_005053,NM_005038,NM_005034,NM_018833,NM_005022,NM_006532,NM_006510,N…	true	0.0850369	0.0139993
regulation of membrane lipid distribution(GO:0097035)	30	88	NM_014616,NM_018053,NM_006095,NM_006045,NM_020453,NM_020353,NM_020360,NM_138813,NM_001005855,ENST00000389967,NM_000350,NM_021105,NM_001025356,NM_016399,NM_019112,NM_013237,NM_005603,NM_001142679,NM_018247,NM_005502,NM_015205,NM_025153,NM_016529,NM_001012302,NM_024490,NM_031418,NM_198531,NM_024837,NM_001001891,NM_002250	true	-0.209026	0.0140043
pyrimidine nucleoside monophosphate metabolic process(GO:0009129)	15	35	NM_012474,NM_004341,NM_173355,NM_000110,NM_001287428,NM_001287426,NM_020201,NM_000373,NM_001025248,NM_016308,NM_031432,NM_017859,NM_145052,NM_001160301,NM_001071	true	0.190164	0.0140472
adult behavior(GO:0030534)	105	218	NM_001277269,NM_004291,NM_052893,NM_004272,NM_001204303,NM_007117,ENST00000334082,NM_001256214,NM_004122,NM_004123,NM_003087,NM_020971,NM_004181,NM_004171,NM_020818,NM_006195,NM_173474,NM_006186,NM_020866,NM_020549,NM_012309,NM_005076,NM_001098834,NM_000905,NM_000911,NM_199460,NM_000100,NM_018977,NM_018941,NM_000271,NM_021784,NM_000230,NM_006395,NM_000310,NM_000332,NM_014191,NM_014141,NM_00119046…	true	-0.117009	0.0140526
aminoglycoside antibiotic metabolic process(GO:0030647)	8	12	NM_003052,NM_020299,NM_001353,NM_032783,NM_001628,NM_001818,NM_003689,NM_003739	true	0.215177	0.0141034
fructose 6-phosphate metabolic process(GO:0006002)	6	30	NM_001242339,NM_001244710,NM_000289,NM_005110,NM_000507,NM_002627	true	-0.391554	0.0141193
vesicle coating(GO:0006901)	37	121	NM_007166,NM_013388,NM_014866,NM_004193,NM_021982,NM_001033503,NM_001287763,NM_199444,NM_006323,NM_006364,NM_017510,NM_021633,NM_001024227,NM_005338,NM_006827,NM_006815,NM_016057,NM_016128,NM_001098398,NM_001343,NM_001655,NM_016451,NM_002645,NM_001981,NM_001077207,NM_138782,NM_015722,NM_033127,NM_001256717,NM_001252231,NM_015980,NM_003590,NM_004922,ENST00000368555,NM_004766,NM_001161357,NM_183352	true	-0.190194	0.0141572
regulation of response to extracellular stimulus(GO:0032104)	49	108	NM_004291,ENST00000343526,ENST00000256969,NM_004122,NM_014991,NM_003068,NM_020773,NM_020775,NM_012245,NM_012238,NM_018848,NM_005036,NM_000905,NM_170784,NM_020375,NM_000271,NM_000230,NM_006395,NM_014169,NM_001025300,NM_000546,NM_021020,NM_006913,NM_000785,NM_000729,NM_030981,NM_032547,NM_031885,NM_016628,NM_005954,NM_030572,NM_015315,NM_001126118,NM_031296,NM_001042432,NM_003565,NM_003900,NM_00495…	true	-0.167411	0.0141645
regulation of response to nutrient levels(GO:0032107)	49	108	NM_004291,ENST00000343526,ENST00000256969,NM_004122,NM_014991,NM_003068,NM_020773,NM_020775,NM_012245,NM_012238,NM_018848,NM_005036,NM_000905,NM_170784,NM_020375,NM_000271,NM_000230,NM_006395,NM_014169,NM_001025300,NM_000546,NM_021020,NM_006913,NM_000785,NM_000729,NM_030981,NM_032547,NM_031885,NM_016628,NM_005954,NM_030572,NM_015315,NM_001126118,NM_031296,NM_001042432,NM_003565,NM_003900,NM_00495…	true	-0.167411	0.0141645
adult locomotory behavior(GO:0008344)	62	110	NM_001277269,NM_052893,NM_001204303,NM_007117,NM_001256214,NM_004123,NM_003087,NM_020971,NM_004181,NM_006195,NM_173474,NM_006186,NM_020866,NM_020549,NM_005076,NM_001098834,NM_000911,NM_199460,NM_000100,NM_018941,NM_000271,NM_021784,NM_006395,NM_000310,NM_000332,NM_014191,NM_001190468,NM_000430,NM_000484,NM_000514,NM_014213,NM_000794,NM_000795,NM_000797,NM_000702,NM_021240,NM_006614,NM_000824,NM_0…	true	-0.149944	0.0142731
positive regulation of glomerulus development(GO:0090193)	5	7	NM_020975,NM_020630,NM_005450,NM_000686,NM_003990	true	-0.415832	0.0142848
smooth muscle cell migration(GO:0014909)	32	104	NM_057159,NM_004162,NM_013993,NM_020415,NM_001024629,NM_000930,NM_000212,NM_000599,NM_000602,NM_000618,NM_000633,NM_000638,NM_000789,NM_001272043,NM_018222,NM_001014795,NM_025195,NM_001202522,NM_002658,NM_001013398,NM_003873,NM_033023,NM_002608,NM_002609,NM_002607,NM_004797,NM_004787,NM_003161,NM_032242,NM_003105,NM_002332,NM_002203	true	-0.202576	0.0143273
positive regulation of interferon-alpha production(GO:0032727)	13	35	NM_001206491,NM_004031,NM_020746,NM_001098627,NM_020119,NM_014314,NM_013254,NM_022168,NM_001571,NM_024625,NM_138554,NM_002156,NM_003821	true	0.195732	0.014368
negative regulation of receptor binding(GO:1900121)	9	26	NM_018058,NM_006167,NM_207191,NM_207197,NM_016269,NM_005450,NM_006666,NM_002840,NM_004797	true	-0.33861	0.0144055
positive regulation of receptor-mediated endocytosis(GO:0048260)	34	78	NM_004313,NM_001257389,NM_013372,NM_004041,NM_003014,NM_014999,NM_174936,NM_012407,NM_012301,NM_000310,NM_017651,NM_005188,NM_006274,NM_000450,NM_005338,NM_000602,NM_000638,NM_000795,NM_052968,NM_018373,NM_002989,NM_001343,NM_001714,NM_032810,NM_015627,NM_001144967,NM_001191323,NM_017988,NM_033131,NM_003941,NM_002527,NM_001234,NM_032291,NM_001146	true	-0.196985	0.0144436
regulation of metanephric mesenchymal cell migration(GO:2000589)	5	7	NM_033023,NM_002608,NM_002609,NM_002607,NM_004797	true	-0.415323	0.0144645
cell migration involved in metanephros development(GO:0035788)	5	7	NM_033023,NM_002608,NM_002609,NM_002607,NM_004797	true	-0.415323	0.0144645
metanephric mesenchymal cell migration(GO:0035789)	5	7	NM_033023,NM_002608,NM_002609,NM_002607,NM_004797	true	-0.415323	0.0144645
cellular response to hexose stimulus(GO:0071331)	74	120	NM_004218,NM_004322,NM_014807,NM_001135585,NM_014904,NM_004041,NM_007345,NM_174889,NM_001178065,NM_003039,NM_001039966,NM_001256627,NM_020665,NM_000040,NM_000944,NM_000101,NM_021784,NM_000201,NM_021724,NM_023928,NM_000349,NM_014172,NM_000436,NM_016275,NM_054033,NM_000525,NM_005400,NM_005391,NM_000681,NM_030756,NM_000780,NM_000756,NM_199292,NM_021132,NM_000859,NM_000820,NM_001503,NM_015470,NM_0027…	true	-0.1377	0.0144738
negative regulation of mitotic metaphase/anaphase transition(GO:0045841)	43	125	NM_001100119,NM_004336,NM_001114091,NM_014885,NM_013366,NM_013367,ENST00000394884,NM_001032293,NM_001258213,NM_000038,NM_000051,NM_198393,NM_022662,NM_017489,NM_006341,NM_020232,NM_014042,NM_181801,NM_016237,NM_016238,NM_001142522,NM_016343,NM_016309,NM_001098507,NM_016141,NM_001007793,NM_032775,NM_182625,NM_003550,NM_001078645,NM_139286,NM_003292,NM_004725,NM_032147,NM_004661,NM_001211,NM_002358…	true	0.143721	0.0144827
regulation of filopodium assembly(GO:0051489)	33	72	NM_004210,NM_001122679,NM_014932,NM_004162,NM_044472,NM_001039802,NM_001135190,NM_012249,NM_001024948,NM_012334,NM_201591,NM_001163278,NM_017433,NM_022449,NM_006254,NM_138995,NM_017679,NM_005402,NM_005721,NM_002989,NM_001387,NM_001663,NM_001978,NM_031475,NM_001838,NM_198576,NM_002045,NM_001040118,NM_003941,NM_002579,NM_003239,NM_003131,NM_004612	true	-0.199513	0.014506
positive regulation of helicase activity(GO:0051096)	6	22	NM_000179,NM_000251,NM_015450,NM_015607,NM_002439,NM_003143	true	0.225717	0.0145728
embryonic digit morphogenesis(GO:0042733)	55	71	NM_004324,NM_004329,NM_004380,NM_007353,NM_003013,NM_021926,NM_021973,NM_006006,NM_024915,NM_001113347,NM_000165,NM_000168,NM_000193,NM_014053,NM_022458,NM_017617,NM_016277,NM_000474,NM_000523,NM_005450,NM_018413,NM_005378,NM_021192,NM_005523,NM_002968,NM_001397,NM_016569,NM_005994,NM_022039,NM_030650,NM_001904,NM_015681,NM_015650,NM_017813,NM_138621,NM_015910,NM_001286577,NM_053001,NM_002048,NM_…	true	-0.158024	0.0146225
peptide transport(GO:0015833)	243	556	NM_004218,NM_019625,NM_007269,NM_001030005,NM_004291,NM_004254,NM_004252,NM_004322,NM_007117,NM_014752,NM_001267843,NM_014807,NM_001205293,NM_207578,NM_014904,NM_004041,ENST00000276198,NM_004063,NM_004122,NM_004123,NM_003012,NM_174889,NM_014980,NM_001178065,NM_007375,NM_003081,NM_003054,NM_004161,NM_004157,NM_001005291,NM_021928,NM_021995,NM_021969,NM_006168,NM_006105,NM_001039966,NM_021871,NM_17…	true	-0.0773025	0.0146348
histone H4-K20 methylation(GO:0034770)	8	21	NM_007300,NM_013449,NM_022455,NM_133330,NM_016374,NM_016028,NM_002892,NM_032701	true	0.214672	0.0146735
DNA strand renaturation(GO:0000733)	8	25	NM_000057,NM_014140,NM_000546,NM_002907,NM_032941,NM_001126118,NM_003579,NM_032143	true	0.21463	0.0147214
mitotic nuclear envelope reassembly(GO:0007084)	10	23	NM_170707,NM_014225,NM_025232,NM_015114,NM_001282625,NM_002715,NM_002717,NM_001001330,NM_003860,NM_003384	true	-0.324892	0.0147281
nuclear envelope reassembly(GO:0031468)	10	23	NM_170707,NM_014225,NM_025232,NM_015114,NM_001282625,NM_002715,NM_002717,NM_001001330,NM_003860,NM_003384	true	-0.324892	0.0147281
positive regulation of homeostatic process(GO:0032846)	73	193	NM_012461,NM_004274,NM_004324,NM_004318,NM_007308,NM_007313,NM_003060,NM_021982,NM_020865,NM_001039966,NM_012215,NM_000067,NM_000070,NM_000963,NM_133263,NM_000928,NM_018689,NM_001004431,NM_006288,NM_170683,NM_000489,NM_000506,NM_001008495,NM_005409,NM_030788,NM_000576,NM_000594,NM_013261,NM_000794,NM_000706,NM_005693,NM_000710,NM_005652,NM_001142797,NM_001504,AF307332,NM_002995,NM_025235,NM_00175…	true	0.119573	0.0147764
demethylation(GO:0070988)	64	135	NM_014663,NM_018039,NM_007125,ENST00000377803,NM_004187,NM_021968,NM_001080432,NM_001080424,NM_001005366,NM_006020,NM_020661,ENST00000381306,NM_012308,AB031230,NM_000941,NM_000106,NM_017460,NM_001034077,NM_001287491,NM_017621,NM_017628,NM_001190484,NM_018433,NM_005392,NM_006789,NM_000786,NM_000761,NM_000777,NM_000770,NM_000771,NM_016147,NM_015061,NM_199286,NM_015013,NM_006618,NM_014508,ENST000003…	true	0.125411	0.0148104
response to redox state(GO:0051775)	12	25	NM_001267843,NM_001030273,NM_012237,NM_054033,NM_014245,NM_018445,NM_000671,NM_016066,NM_138440,NM_004898,NM_002518,NM_001035	true	-0.302786	0.0149055
regulation of cAMP-mediated signaling(GO:0043949)	20	53	NM_004359,NM_004123,NM_000960,NM_000922,NM_000233,NM_001008504,NM_005409,NM_014247,NM_014310,NM_000684,NM_001142797,NM_001504,NM_002923,NM_016559,NM_001565,NM_001130690,NM_001077489,NM_002619,NM_002416,NM_003337	true	0.177257	0.0149169
regulation of cell projection assembly(GO:0060491)	96	198	NM_004210,NM_001122679,NM_007284,NM_014714,NM_014932,NM_174878,NM_004162,NM_044472,NM_001039802,NM_006063,NM_012121,NM_001135190,NM_012249,NM_001024948,NM_012334,NM_000038,NM_005022,NM_018890,NM_201591,NM_001163278,NM_017433,NM_022488,NM_018984,NM_001025616,NM_133180,NM_001258457,NM_000222,NM_000201,NM_005242,NM_005246,NM_198098,NM_018688,NM_022449,NM_006254,NM_006274,NM_138995,NM_201402,NM_00041…	true	-0.12111	0.0149245
negative regulation of small GTPase mediated signal transduction(GO:0051058)	39	91	NM_144997,NM_014874,NM_173690,NM_007314,NM_007368,ENST00000380573,NM_022481,NM_001025616,NM_000267,NM_000261,NM_133376,NM_000507,NM_006989,NM_022904,NM_006772,NM_001251902,NM_021137,NM_001105540,NM_001009552,NM_032552,NM_153186,NM_002890,NM_001006617,NM_001006618,NM_138709,NM_015894,NM_182643,NM_024767,NM_001042492,NM_001256877,NM_033304,NM_003590,NM_144606,NM_003255,NM_213622,NM_004787,NM_004658…	true	-0.184442	0.0149264
inner ear morphogenesis(GO:0042472)	83	141	NM_018013,NM_004327,NM_021962,NM_006161,NM_001032280,NM_001080508,NM_020402,NM_182983,NM_018890,NM_017420,NM_017412,NM_020335,NM_000260,NM_021728,NM_005247,NM_005221,NM_000307,NM_017581,NM_001002295,NM_000346,NM_198174,NM_005172,NM_147196,NM_005461,NM_016239,NM_000454,NM_000503,NM_014246,NM_005430,NM_201280,NM_022970,NM_016307,NM_000693,NM_005631,NM_016133,NM_014562,NM_001105574,NM_005542,NM_0055…	true	-0.129821	0.0149364
neuron projection extension(GO:1990138)	77	150	NM_007283,NM_007284,NM_014683,NM_018014,NM_001271938,NM_004263,NM_001080395,NM_013366,NM_004097,NM_003062,NM_003061,NM_004186,NM_001271534,NM_006168,NM_020851,NM_006080,NM_020532,NM_001024629,NM_018977,NM_017514,NM_014000,NM_001164741,NM_020063,NM_000430,NM_133376,NM_000555,NM_030808,NM_201266,NM_030753,NM_005631,NM_022893,NM_016113,NM_021132,NM_001014795,NM_016639,NM_001389,NM_005977,NM_005909,N…	true	-0.13431	0.0151133
columnar/cuboidal epithelial cell development(GO:0002066)	35	62	NM_173834,NM_004360,NM_004322,NM_001267843,NM_019884,NM_006168,NM_020859,NM_001030273,NM_012391,NM_000965,NM_000966,NM_020375,ENST00000379123,NM_000280,NM_020156,AK127929,NM_134428,NM_021073,NM_019102,NM_005631,NM_002944,NM_001718,NM_002196,NM_002093,NM_004898,NM_002509,NM_001071,NM_002613,NM_001202,NM_001259,NM_178819,NM_001040455,NM_001189,NM_001198,NM_003392	true	-0.193216	0.0151589
post-translational protein modification(GO:0043687)	197	492	NM_004204,NM_007210,NM_014674,NM_052859,NM_004278,NM_004343,NM_144988,NM_001011719,NM_013338,NM_013339,NM_013335,NM_013388,NM_014908,NM_004042,NM_013406,NM_003033,NM_014960,NM_001243564,NM_001244710,NM_001004127,NM_001267595,NM_021982,NM_021971,NM_006122,NM_174963,NM_021808,NM_001005377,NM_006011,NM_024989,NM_001033503,NM_173216,NM_012214,NM_024887,NM_012405,NM_001114618,ENST00000421673,NM_006577…	true	-0.0851957	0.015219
membrane lipid biosynthetic process(GO:0046467)	98	238	NM_004204,NM_004278,NM_013443,NM_003034,NM_003080,NM_001256126,NM_021996,NM_001080438,NM_001005377,NM_006011,NM_024989,NM_001010887,NM_182965,NM_001005741,NM_018973,ENST00000321276,NM_018941,NM_017436,NM_006415,NM_133492,NM_006254,NM_181746,NM_020126,NM_021628,NM_147156,NM_198207,NM_001004470,NM_005482,NM_148920,NM_000543,NM_030791,NM_022821,NM_014489,NM_005668,NM_018238,NM_206907,NM_206918,NM_03…	true	-0.119563	0.0152357
cellular response to glucose starvation(GO:0042149)	17	45	NM_012407,NM_006516,NM_001287426,NM_006252,NM_021127,NM_000546,NM_005347,NM_000633,NM_206907,NM_014520,NM_005531,NM_030952,NM_001673,NM_030627,NM_015324,NM_001126118,NM_001099668	true	0.183846	0.0152552
activation of protein kinase B activity(GO:0032148)	24	48	NM_018084,NM_007262,NM_173629,NM_000208,NM_000207,NM_022334,NM_001007156,NM_000681,ENST00000360635,NM_000683,ENST00000394480,NM_000820,NM_005954,NM_001012338,NM_002744,NM_002527,NM_002530,NM_002613,NM_002608,NM_004763,NM_001145,NM_003329,NM_003392,NM_032409	true	-0.227702	0.0152608
positive regulation of protein kinase activity(GO:0045860)	440	1086	NM_004210,NM_078467,NM_004230,NM_014685,NM_007217,NM_018084,NM_007262,NM_007261,NM_014674,NM_012435,NM_004295,NM_004291,NM_004287,NM_004356,NM_004333,NM_004343,NM_004304,ENST00000383771,NM_007155,NM_001204315,NM_014760,NM_014780,NM_007197,NM_014795,NM_057159,NM_057161,NM_018098,NM_004383,NM_001243756,NM_019884,NM_173629,NM_013388,NM_013372,NM_207578,NM_004094,NM_173660,NM_004036,NM_004087,NM_0040…	true	-0.057357	0.0152831
establishment or maintenance of cytoskeleton polarity(GO:0030952)	5	17	NM_198098,NM_170707,NM_006845,NM_001282625,NM_205842	true	-0.413059	0.0152841
regulation of chemokine biosynthetic process(GO:0045073)	12	27	NM_021805,NM_000576,NM_000594,NM_000589,NM_000600,NM_000619,NM_001700,NM_001972,NM_182919,NM_002133,NM_003265,NM_003392	true	0.198131	0.0153144
killing by host of symbiont cells(GO:0051873)	7	8	NM_007275,NM_004345,NM_000265,NM_000242,NM_005242,NM_018643,NM_001911	true	0.219196	0.0153729
disruption by host of symbiont cells(GO:0051852)	7	8	NM_007275,NM_004345,NM_000265,NM_000242,NM_005242,NM_018643,NM_001911	true	0.219196	0.0153729
synapsis(GO:0007129)	37	101	NM_004237,NM_018087,NM_012447,NM_012444,NM_144688,NM_007068,NM_001136505,NM_001136566,NM_006455,NM_000249,NM_014258,NM_001143764,NM_001105578,NM_182489,NM_025259,NM_001282718,NM_001282717,NM_032858,NM_001131034,NM_182852,NM_001003811,NM_194439,NM_031275,NM_031271,NM_001282136,NM_001040108,NM_001129979,NM_152764,NM_033084,NM_033025,NM_032132,NM_001123225,NM_002441,NM_002440,NM_003176,NM_004639,NM_…	true	0.149644	0.0154235
purine ribonucleotide biosynthetic process(GO:0009152)	234	651	NM_007274,NM_012474,NM_052847,NM_004274,NM_007100,NM_007102,NM_001204375,NM_144997,NM_001278497,NM_019888,NM_019884,NM_013330,NM_001256214,NM_019839,NM_004044,NM_004037,ENST00000276198,NM_004036,NM_013411,NM_013442,NM_174858,NM_144699,NM_012093,NM_006172,NM_006180,NM_001039966,NM_001005353,NM_021823,NM_001204218,NM_001242840,NM_020683,NM_001267609,NM_012393,NM_020546,NM_182978,NM_000026,NM_000025…	true	-0.0781144	0.0154565
positive regulation of transcription from RNA polymerase I promoter(GO:0045943)	8	20	NM_001005862,NM_020162,NM_005381,NM_206827,NM_015107,NM_015462,NM_001184898,NM_001076683	true	0.21396	0.0155064
positive regulation of lipid transport(GO:0032370)	40	110	NM_007121,NM_007366,NM_006167,NM_006095,NM_012238,NM_020529,NM_020415,NM_000446,NM_001009185,NM_016399,NM_000576,NM_019112,NM_013237,NM_001007098,NM_000778,NM_000756,NM_005693,NM_005502,NM_001480,NM_002979,NM_001718,NM_016529,NM_002758,NM_001955,NM_198594,NM_001256796,NM_003701,NM_173076,NM_001083602,NM_015973,NM_003561,NM_003560,NM_003839,NM_033012,NM_001082,NM_004744,NM_004797,NM_002415,NM_0031…	true	0.146003	0.0155497
positive regulation of innate immune response(GO:0045089)	214	645	NM_180976,NM_018082,NM_014602,NM_001030007,NM_012448,NM_052814,NM_052813,NM_019604,NM_052891,NM_052890,NM_007199,NM_001206491,NM_147780,NM_001114123,NM_004090,ENST00000334163,NM_004031,NM_004086,NM_004079,NM_007329,NM_001174104,NM_003010,NM_007360,NM_004139,NM_021975,NM_006116,NM_021803,NM_006092,NM_001032288,NM_006068,NM_020746,NM_020672,NM_001278548,NM_001278547,NM_020651,NM_001135044,NM_020529…	true	0.0761414	0.0155899
spindle assembly checkpoint(GO:0071173)	43	125	NM_001100119,NM_004336,NM_001114091,NM_014885,NM_013366,NM_013367,ENST00000394884,NM_001032293,NM_001258213,NM_000038,NM_000051,NM_198393,NM_022662,NM_017489,NM_006341,NM_020232,NM_014042,NM_170589,NM_181801,NM_016237,NM_016238,NM_016343,NM_016309,NM_001098507,NM_016141,NM_001007793,NM_032775,NM_182625,NM_003550,NM_001078645,NM_139286,NM_003292,NM_004725,NM_032147,NM_004661,NM_001211,NM_002358,NM…	true	0.142614	0.0156726
low-density lipoprotein particle receptor biosynthetic process(GO:0045713)	8	21	NM_021982,NM_012235,NM_000212,NM_014255,NM_019113,NM_138711,NM_004797,NM_002210	true	0.213756	0.0157522
blood coagulation, extrinsic pathway(GO:0007598)	5	11	NM_001032281,NM_000131,NM_006287,NM_000504,NM_001993	true	0.231494	0.0158253
positive regulation of cellular amino acid metabolic process(GO:0045764)	6	20	NM_007262,NM_182983,NM_001002295,NM_005123,NM_000754,NM_003466	true	-0.386446	0.0160503
positive regulation of cell aging(GO:0090343)	8	25	NM_012238,NM_000077,NM_170707,NM_000546,NM_001282625,NM_001126118,NM_145901,NM_003483	true	-0.349252	0.0160576
alpha-linolenic acid metabolic process(GO:0036109)	10	33	NM_004265,NM_013402,NM_021814,NM_001242831,NM_000414,NM_001007098,NM_002979,NM_001607,NM_001995,NM_017770	true	-0.321633	0.0161079
tRNA modification(GO:0006400)	37	127	NM_020810,NM_001286259,NM_022353,NM_020175,NM_181725,NM_005371,NM_133644,NM_014484,NM_018396,NM_022727,NM_030934,NM_001265582,NM_025215,NM_001605,NM_022156,NM_017807,NM_017803,NM_138775,NM_212554,NM_017872,NM_024638,NM_017774,NM_017755,NM_017722,NM_031209,NM_017910,NM_031307,NM_177439,NM_139242,NM_001039693,NM_181581,NM_145232,NM_033661,NM_003142,NM_001012762,NM_152307,NM_004412	true	0.14902	0.0161167
regulation of fatty acid biosynthetic process(GO:0042304)	24	59	NM_007121,NM_007300,NM_012235,NM_012238,NM_000029,NM_000040,NM_000018,NM_000963,NM_006252,NM_000482,NM_000483,NM_000455,NM_016203,NM_005399,NM_000706,NM_005693,NM_016133,NM_052968,NM_021242,NM_015023,NM_005542,NM_001608,NM_032951,NM_002612	true	0.16818	0.0162508
positive regulation of cell adhesion(GO:0045785)	162	350	NM_004227,NM_173828,NM_014634,NM_018055,NM_018012,NM_012425,NM_004333,NM_004343,NM_007124,NM_144997,NM_001033047,NM_003012,NM_003013,NM_014970,NM_020909,NM_020975,NM_020987,NM_004148,NM_044472,NM_020820,NM_006113,NM_006079,NM_021871,NM_001039802,NM_001080508,NM_007046,NM_020630,NM_001004019,NM_172212,NM_172210,NM_012334,NM_000038,NM_000039,NM_005052,NM_201525,NM_018890,NM_000910,NM_006521,NM_0009…	true	-0.0928193	0.0162732
negative regulation of multicellular organism growth(GO:0040015)	14	26	NM_001256053,AJ271790,NM_014915,NM_000025,NM_000024,NM_001008530,NM_000684,NM_031885,NM_002973,NM_016592,NM_030665,NM_001130715,NM_001083602,NM_003714	true	-0.282081	0.0162953
aorta development(GO:0035904)	24	47	NM_001099412,NM_006167,NM_012259,NM_000090,NM_000297,NM_000503,NM_019074,NM_005576,NM_005524,NM_080647,NM_080646,NM_203284,NM_005982,NM_005994,NM_002763,NM_033163,NM_053025,NM_003923,NM_002609,NM_003221,NM_001040708,NM_003131,NM_003107,NM_002332	true	-0.225685	0.0163443
chromosome localization(GO:0050000)	31	57	NM_018101,NM_014750,ENST00000394884,NM_144718,NM_144688,NM_001005386,NM_001136505,NM_001136566,NM_000249,NM_005261,NM_017668,NM_000321,NM_020066,NM_016343,NM_080668,NM_005721,NM_032636,NM_005886,NM_031966,NM_015169,NM_017884,NM_001813,NM_017785,NM_001013437,NM_031216,NM_031217,NM_003550,NM_003590,NM_004724,NM_004661,NM_032436	true	0.156756	0.0163643
GO:0032312	30	127	NM_014716,NM_057169,NM_001244888,NM_006076,NM_001135190,NM_001135187,NM_001044305,NM_012287,NM_001122772,NM_022481,NM_014030,NM_018404,NM_006869,NM_001143778,NM_022733,NM_014570,NM_015230,NM_032552,NM_031946,NM_001247996,NM_030649,NM_138709,NM_017707,NM_001042535,NM_139201,NM_001040118,NM_003887,NM_001144000,NM_032389,NM_001037131	true	-0.204784	0.0163652
Sertoli cell differentiation(GO:0060008)	18	25	NM_207308,NM_021951,NM_000145,NM_000201,NM_000346,NM_000475,NM_000489,NM_016374,NM_005634,NM_014587,NM_005751,NM_002870,NM_002892,NM_024426,NM_002052,NM_001006946,NM_002529,NM_003206	true	0.180423	0.0164215
cellular response to lithium ion(GO:0071285)	12	17	NM_004364,NM_004360,NM_004343,NM_019884,NM_004064,NM_173353,NM_000043,NM_000193,NM_001136022,NM_001442,NM_173165,NM_002479	true	-0.299371	0.0164271
regulation of Wnt signaling pathway(GO:0030111)	204	488	NM_173849,NM_014604,NM_014709,NM_004360,NM_018136,NM_014795,NM_019884,NM_013372,NM_001206885,NM_004083,NM_007314,NM_007313,NM_003015,NM_003014,NM_020920,NM_003012,NM_003013,NM_003068,NM_003036,NM_004143,NM_004185,NM_020800,NM_001005209,NM_012090,NM_006098,NM_001206998,NM_001080512,NM_001080508,NM_001256312,NM_001277053,NM_001242811,NM_001030273,NM_024911,NM_001037954,NM_001038633,NM_001080824,NM_…	true	-0.082794	0.0164359
intestinal epithelial cell differentiation(GO:0060575)	13	20	NM_173834,NM_004360,NM_021818,NM_012391,NM_020375,NM_005257,NM_020156,NM_019102,NM_080473,NM_002052,NM_001071,NM_001189,NM_001198	true	-0.289933	0.0165438
leukocyte chemotaxis(GO:0030595)	135	294	NM_001037341,NM_004343,NM_013372,NM_004054,NM_004072,NM_004106,NM_013447,NM_003019,NM_007365,NM_004145,NM_004139,NM_020820,NM_006113,NM_020672,NM_001271749,NM_001100812,NM_207032,NM_012398,NM_001204088,NM_005084,NM_000081,NM_005026,NM_018890,NM_000928,NM_000131,NM_006419,NM_000222,NM_006368,NM_000211,NM_005242,NM_018643,NM_017636,NM_000331,NM_006274,NM_006273,NM_156039,ENST00000006053,NM_148910,N…	true	0.0922782	0.0165866
regulation of response to cytokine stimulus(GO:0060759)	97	270	NM_004235,NM_173843,NM_007121,NM_007199,NM_001206491,NM_004031,NM_007355,NM_007365,NM_003062,NM_021913,NM_021805,NM_020746,NM_007065,NM_012293,NM_012275,NM_182965,NM_000039,NM_017414,NM_018965,NM_001005781,NM_006411,NM_006412,NM_001017368,NM_005263,NM_005242,NM_000416,NM_000430,NM_001288837,NM_021057,NM_021068,NM_005419,NM_030776,NM_021002,NM_133631,NM_000605,NM_000619,NM_000613,NM_000629,NM_0132…	true	0.105709	0.0165984
positive regulation of kidney development(GO:0090184)	11	20	NM_020975,NM_020630,NM_000346,NM_005450,NM_030761,NM_000686,NM_014587,NM_001957,NM_003990,NM_002467,NM_001202	true	-0.30908	0.0166403
negative regulation of cell division(GO:0051782)	10	26	NM_004217,NM_018136,NM_000057,NM_013245,NM_152284,NM_203394,NM_015693,NM_024680,NM_001077268,NM_002467	true	0.204303	0.0166482
regulation of multicellular organism growth(GO:0040014)	71	142	NM_001256053,AJ271790,NM_012448,NM_001204303,NM_014915,NM_004118,NM_004122,NM_001080432,NM_006060,NM_024945,NM_020634,NM_000029,NM_000025,NM_000024,NM_000909,NM_000942,NM_000948,NM_170784,NM_000163,NM_006311,NM_000230,NM_005294,NM_020167,NM_133433,NM_006218,NM_138924,NM_134442,NM_181809,NM_000454,NM_001008530,NM_000484,NM_000515,NM_021081,NM_000618,NM_000633,NM_022970,NM_006796,NM_000684,NM_00560…	true	-0.137638	0.0166526
pseudopodium organization(GO:0031268)	14	22	NM_044472,NM_001039802,NM_006063,NM_012121,NM_000038,NM_020387,NM_000222,NM_005242,NM_006779,NM_002989,NM_152243,NM_001093772,NM_001838,NM_145057	true	0.190721	0.0166571
hormone transport(GO:0009914)	254	558	NM_004218,NM_007269,NM_001030005,NM_004291,NM_004322,NM_007117,NM_014752,NM_001267843,NM_014807,NM_001205293,NM_207578,NM_014904,NM_004041,ENST00000276198,NM_004075,NM_004122,NM_004123,NM_003020,NM_003012,NM_174889,NM_014980,NM_001178065,NM_007375,NM_003081,NM_003054,NM_004161,NM_004157,NM_001005291,NM_021928,NM_021995,NM_021969,NM_006167,NM_006168,NM_006105,NM_001039966,NM_021871,NM_012193,NM_17…	true	-0.0741262	0.0167532
positive regulation of mitochondrial depolarization(GO:0051901)	7	8	NM_006098,NM_012215,NM_000261,NM_006818,NM_000697,NM_000729,AF307332	true	0.218032	0.0168125
platelet-derived growth factor receptor signaling pathway(GO:0048008)	47	93	NM_014660,NM_004252,NM_004327,NM_014813,NM_007308,NM_007314,NM_007313,NM_006007,NM_207123,NM_000960,NM_001024629,NM_000930,NM_006480,NM_000131,NM_000145,NM_005246,NM_000314,NM_006206,NM_006207,NM_016205,NM_001098503,NM_014567,NM_025208,NM_002843,NM_002827,NM_002828,NM_002834,NM_001647,NM_002645,NM_001993,NM_080423,NM_001184717,NM_001170714,NM_003901,NM_003870,NM_003873,NM_004972,NM_004998,NM_0330…	true	-0.166401	0.016988
cellular response to glucose stimulus(GO:0071333)	70	113	NM_004218,NM_004322,NM_014807,NM_014904,NM_004041,NM_007345,NM_174889,NM_001178065,NM_001039966,NM_001256627,NM_020665,NM_000040,NM_000944,NM_000101,NM_021784,NM_000201,NM_021724,NM_023928,NM_000349,NM_014172,NM_000436,NM_016275,NM_054033,NM_000525,NM_005400,NM_005391,NM_000681,NM_030756,NM_000780,NM_000756,NM_199292,NM_021132,NM_000859,NM_000820,NM_001503,NM_015470,NM_002730,NM_001962,NM_032951,…	true	-0.138158	0.0169915
artery morphogenesis(GO:0048844)	46	108	NM_001099412,NM_021973,NM_012259,NM_000090,NM_001024629,NM_000118,NM_020338,NM_000267,NM_005251,NM_000297,NM_000384,NM_017617,NM_000503,NM_000522,NM_019074,NM_016307,NM_001142620,NM_014495,NM_000860,NM_005524,NM_005522,NM_080647,NM_080646,NM_203284,NM_001453,NM_005982,NM_005994,NM_002763,NM_017780,NM_001042492,NM_033163,NM_053025,NM_003923,NM_003873,NM_001199042,NM_001146312,NM_153604,NM_002609,N…	true	-0.167966	0.0170512
osteoblast differentiation(GO:0001649)	185	414	NM_001178133,NM_001034852,NM_004364,NM_004329,NM_004396,NM_004385,NM_001033047,NM_013417,NM_004104,NM_003030,NM_003012,NM_003013,NM_020905,NM_003068,NM_003036,NM_004143,NM_020800,NM_021973,NM_006157,NM_001005340,NM_006098,NM_006037,NM_006039,NM_012118,NM_001010931,NM_001010934,NM_012250,NM_020648,NM_020638,NM_001024736,NM_001271893,NM_012341,NM_000038,NM_018844,NM_000088,NM_001024630,NM_000165,NM…	true	-0.0863329	0.0171052
regulation of ERBB signaling pathway(GO:1901184)	76	189	NM_004210,ENST00000270460,NM_144949,NM_001204303,NM_007096,NM_004068,NM_003029,NM_003026,NM_020972,NM_044472,NM_001039966,NM_001039802,NM_012116,NM_001242837,NM_012305,NM_000029,NM_000021,NM_199421,NM_001024666,NM_018948,NM_018955,NM_005246,NM_005228,NM_022450,NM_006205,NM_005188,NM_001270989,NM_001008530,NM_000447,NM_000484,NM_014203,NM_201282,NM_201283,NM_021009,NM_000639,NM_000681,NM_001098503…	true	-0.13271	0.0171368
tetrapyrrole biosynthetic process(GO:0033014)	38	101	NM_078470,NM_052845,NM_004136,NM_001010867,NM_172250,NM_001256530,NM_000031,NM_000032,NM_000097,NM_000190,NM_000309,NM_000375,NM_000374,NM_017696,NM_016311,NM_016016,NM_000688,NM_005689,NM_018346,NM_001012515,NM_001165258,NM_001303,NM_005915,NM_005916,NM_005914,NM_016462,NM_017875,NM_015506,NM_182802,NM_182776,ENST00000368774,NM_178191,NM_181425,NM_003850,NM_003204,NM_003126,NM_002388,NM_004526	true	0.146927	0.0171429
regulation of vascular endothelial growth factor receptor signaling pathway(GO:0030947)	23	65	NM_013451,NM_012193,NM_198400,NM_000212,NM_000576,NM_000638,NM_013232,NM_032552,NM_002827,NM_005954,NM_001668,NM_016457,NM_002729,NM_002738,NM_138709,NM_024600,NM_024756,NM_003862,NM_001001555,NM_181054,NM_002205,NM_003377,NM_004465	true	-0.228388	0.0171465
response to peptide hormone(GO:0043434)	376	849	NM_004231,NM_173850,NM_001256053,NM_014602,NM_007269,NM_012448,NM_012435,NM_014707,NM_012479,NM_052847,NM_004246,NM_004333,NM_007122,NM_001204315,NM_014805,NM_014802,NM_014832,NM_001034954,NM_004383,NM_001243756,NM_019884,ENST00000343526,NM_207578,NM_004096,NM_004095,NM_014915,NM_019851,NM_004047,NM_004036,NM_004064,NM_004075,NM_013402,NM_004123,NM_004102,NM_003029,NM_001174066,NM_020967,NM_00307…	true	-0.0608689	0.0171969
inositol metabolic process(GO:0006020)	12	30	NM_001130858,NM_017584,NM_014214,NM_016368,NM_005536,NM_022755,NM_015216,NM_001190214,NM_017813,NM_001144879,NM_001110792,NM_002220	true	0.196357	0.0174681
response to lipopolysaccharide(GO:0032496)	200	408	NM_007207,NM_014633,NM_018064,NM_001037341,NM_012448,NM_004271,NM_004345,NM_004327,NM_007199,NM_144701,NM_007308,NM_007313,NM_004120,NM_003018,NM_001174104,NM_003005,NM_001037499,NM_004143,NM_004139,NM_207315,NM_021913,NM_021975,NM_021962,NM_021947,NM_021805,ENST00000314940,NM_012118,NM_020672,NM_001278548,NM_001278547,NM_020661,NM_020651,NM_020529,NM_005007,NM_005011,NM_018841,NM_000963,NM_00096…	true	0.0772375	0.0174855
nephron epithelium development(GO:0072009)	62	127	NM_014625,NM_018012,NM_014751,NM_001010926,NM_012301,NM_000019,NM_006522,NM_017415,NM_006317,NM_001164617,NM_005251,NM_000296,NM_198098,NM_014079,NM_000297,NM_017651,NM_017617,NM_001002295,NM_006236,NM_000346,NM_001190468,NM_001009944,NM_058238,NM_018490,NM_030761,NM_000619,NM_001098210,NM_005631,NM_005618,NM_014587,NM_005524,NM_014571,NM_001454,NM_001282971,NM_002968,NM_005982,NM_001025109,NM_02…	true	-0.145647	0.0175116
regulation of lymphocyte migration(GO:2000401)	28	65	NM_007365,NM_006419,NM_006273,NM_000609,NM_006871,NM_013258,NM_199168,NM_002995,NM_002989,NM_002982,NM_002963,NM_005990,NM_001190259,NM_001647,NM_001565,NM_173174,NM_001123041,NM_003824,NM_003820,NM_178518,NM_001123396,NM_003183,NM_002444,NM_001033886,NM_004591,NM_001110,NM_001109,NM_003392	true	0.160314	0.0175156
lysosomal transport(GO:0007041)	47	94	NM_001030007,NM_012437,NM_014710,NM_013312,NM_014957,NM_014924,NM_001257999,NM_174936,NM_001204255,NM_207012,NM_000024,NM_001105251,NM_198400,NM_000271,NM_000252,NM_001003681,NM_001025300,NM_018467,NM_005638,NM_001265608,NM_030918,NM_005561,NM_032520,NM_016642,NM_002959,NM_022067,NM_001012398,NM_016410,NM_022133,NM_022113,NM_031430,NM_198709,ENST00000272233,NM_015888,NM_001042646,NM_198578,NM_017…	true	-0.165609	0.0175643
DNA ligation(GO:0006266)	10	39	NM_173545,NM_022550,NM_000234,NM_001469,NM_002875,NM_002128,NM_002129,NM_001067,NM_002412,NM_002312	true	0.203574	0.0175735
ERK1 and ERK2 cascade(GO:0070371)	180	418	NM_004235,NM_001256053,NM_018055,NM_004252,NM_004333,NM_004313,ENST00000383771,NM_144997,NM_004390,NM_004383,NM_173657,NM_004090,NM_014915,NM_019851,NM_004041,ENST00000276198,NM_001033047,NM_007314,NM_007313,ENST00000341435,NM_001039966,NM_173515,NM_006092,NM_021871,NM_001271749,NM_020638,ENST00000571800,NM_207103,ENST00000380573,NM_000029,NM_000916,NM_170724,NM_001024629,NM_000958,NM_000934,NM_0…	true	-0.0871375	0.0175745
pyrimidine nucleobase catabolic process(GO:0006208)	9	17	NM_000110,NM_006426,NM_020134,NM_005589,NM_001014809,NM_001386,NM_001387,NM_001385,NM_001160301	true	-0.331149	0.0175843
skin development(GO:0043588)	303	544	NM_004235,NM_012427,NM_004346,NM_007111,NM_007113,NM_007123,NM_014762,NM_057168,NM_007084,NM_019885,NM_001242310,NM_013409,NM_003014,NM_144777,NM_004164,NM_020839,NM_020801,NM_021926,NM_021978,NM_021975,NM_006121,NM_006142,NM_006147,NM_001080476,NM_021818,NM_012114,NM_012259,NM_012242,NM_020634,NM_001010926,NM_013943,NM_207123,NM_005094,NM_000038,NM_000021,NM_000052,NM_000060,NM_005046,NM_000089,…	true	-0.0674531	0.0175987
synaptic vesicle recycling(GO:0036465)	23	71	NM_012437,NM_052893,NM_007166,NM_014932,NM_001242369,NM_007308,NM_003026,NM_020946,NM_004162,NM_001080421,NM_001001132,NM_012398,NM_000113,NM_002866,NM_001365,NM_001746,NM_001635,NM_002663,NM_182706,NM_004935,NM_033104,NM_002547,NM_003165	true	-0.227573	0.0176142
positive regulation of defense response(GO:0031349)	280	785	NM_180976,NM_018082,NM_014602,NM_001030007,NM_012448,NM_052814,NM_052813,NM_019604,NM_052891,NM_052890,NM_007155,NM_007199,NM_001206491,NM_147780,NM_001114123,NM_004090,ENST00000334163,NM_004031,NM_004086,NM_004079,NM_007329,NM_004106,NM_001174104,NM_003010,NM_007360,NM_004139,NM_021975,NM_006116,NM_006139,NM_021803,NM_006092,NM_001032288,NM_006068,NM_020746,NM_172175,NM_020683,NM_020672,NM_00127…	true	0.0662828	0.0176298
semaphorin-plexin signaling pathway(GO:0071526)	25	58	NM_012431,NM_004309,NM_014808,NM_020911,NM_004186,NM_021973,NM_006080,NM_012401,NM_018890,NM_001024629,NM_017514,NM_000245,NM_006378,NM_022367,NM_001142287,NM_181775,NM_201266,NM_001163257,NM_001105543,NM_025179,NM_015103,NM_002673,NM_017789,NM_003873,NM_032242	true	-0.219412	0.0177003
neural crest cell development(GO:0014032)	43	88	NM_004329,NM_014795,NM_020975,NM_003068,NM_004186,NM_021973,NM_006080,NM_172037,NM_001024629,NM_000193,NM_006379,NM_005251,NM_005235,NM_000346,NM_005117,NM_001190468,NM_016269,NM_000474,NM_000514,NM_006941,NM_201266,NM_005631,NM_000899,NM_000867,NM_005560,NM_014587,NM_005524,NM_080647,NM_080646,NM_001453,NM_153426,NM_001957,NM_001955,NM_001048183,NM_181458,NM_003924,NM_003873,NM_003108,NM_183374,…	true	-0.172191	0.0177914
positive regulation of organelle organization(GO:0010638)	322	803	NM_014629,NM_014634,NM_014633,NM_018068,NM_007286,NM_012461,NM_012478,NM_012479,NM_001277313,NM_001277314,NM_004333,NM_004324,NM_004322,NM_007111,NM_019592,NM_007127,NM_014750,NM_014802,NM_001278464,NM_175850,NM_019884,NM_014946,NM_014906,NM_173685,NM_004041,NM_004064,NM_004052,NM_004087,NM_007349,NM_007358,NM_173728,NM_007300,NM_004124,NM_003012,NM_001037494,NM_001005291,XM_005273551,NM_021914,N…	true	-0.065351	0.0177942
microtubule anchoring at microtubule organizing center(GO:0072393)	6	10	NM_006197,NM_016350,NM_015250,NM_001714,NM_033028,NM_032410	true	0.223137	0.0177944
negative regulation of neuron differentiation(GO:0045665)	51	65	NM_014717,NM_004343,NM_004316,NM_018136,NM_014943,NM_001037954,NM_001010926,NM_005076,NM_006562,NM_000168,NM_198472,NM_021784,NM_017617,NM_000346,NM_000435,NM_133376,NM_000484,NM_021025,NM_005427,NM_005413,NM_000614,NM_018249,NM_006735,NM_018200,NM_005634,NM_005612,NM_005618,NM_021198,NM_014502,NM_014587,NM_005524,NM_015412,NM_024336,NM_001546,NM_182642,NM_002166,NM_177398,NM_003924,NM_002585,NM_…	true	-0.159148	0.0178154
regulation of mononuclear cell migration(GO:0071675)	12	25	NM_004054,NM_004072,NM_001142343,NM_021073,NM_000594,NM_000589,NM_002982,NM_002889,NM_002843,NM_003246,NM_004787,NM_002306	true	0.196085	0.0178182
craniofacial suture morphogenesis(GO:0097094)	15	20	NM_001271938,NM_144966,NM_000168,NM_016277,NM_000474,NM_022970,NM_000660,NM_016133,NM_005542,NM_005941,NM_002007,NM_004995,NM_003239,NM_002449,NM_001202	true	-0.271361	0.0178371
embryonic retina morphogenesis in camera-type eye(GO:0060059)	6	14	NM_006744,NM_022740,NM_002763,NM_016952,NM_002335,NM_002336	true	-0.38213	0.0178384
mitotic metaphase plate congression(GO:0007080)	17	30	NM_018101,ENST00000394884,NM_000321,NM_080668,NM_032636,NM_031966,NM_015169,NM_017884,NM_001813,NM_017785,NM_001013437,NM_031216,NM_031217,NM_003590,NM_004724,NM_004661,NM_032436	true	0.181621	0.0179129
blood vessel remodeling(GO:0001974)	35	60	NM_004324,NM_021913,NM_001278939,NM_000029,NM_000020,NM_000052,NM_006379,NM_005251,NM_000412,NM_019074,NM_000603,NM_000660,NM_000679,NM_000686,NM_000787,NM_000789,NM_000885,NM_080647,NM_001453,NM_001430,NM_001711,NM_022152,NM_198951,NM_033163,NM_002020,NM_001123041,NM_004849,NM_001123396,NM_004613,NM_002397,NM_001204,NM_002309,NM_001106,NM_001188,NM_004465	true	-0.188809	0.0179336
mitochondrial depolarization(GO:0051882)	15	26	NM_007313,NM_006098,NM_012215,NM_000261,NM_005157,NM_000633,NM_006818,NM_000697,NM_000729,NM_022873,AF307332,NM_001498,NM_198578,NM_017917,NM_002061	true	0.186795	0.0179979
embryonic hemopoiesis(GO:0035162)	24	51	NM_001099412,NM_001256312,NM_001024847,NM_006563,NM_000222,NM_001002295,NM_005475,NM_000588,NM_001142640,NM_000899,NM_005574,NM_001459,NM_001093772,NM_005933,NM_001002878,NM_001197104,NM_002585,NM_175719,NM_004774,NM_175722,NM_175721,NM_003189,NM_153813,NM_002253	true	-0.222783	0.018013
response to mineralocorticoid(GO:0051385)	26	33	NM_007117,NM_003054,NM_001039966,NM_005253,NM_005252,NM_005184,NM_000349,NM_005438,NM_006888,NM_000781,NM_006732,NM_000756,NM_000706,NM_199292,NM_000898,NM_000863,NM_001012338,NM_203314,NM_001901,NM_001955,NM_001166579,NM_053049,NM_053056,NM_033360,NM_002229,NM_002241	true	0.163163	0.018045
regulation of gene silencing(GO:0060968)	26	64	NM_020948,NM_001278215,NM_001080436,NM_020661,NM_012238,NM_014034,NM_181708,NM_014240,NM_005392,NM_001142640,NM_015107,NM_015477,NM_032876,NM_030625,NM_001644,NM_002701,NM_001184898,NM_001798,NM_024674,NM_194249,NM_003536,NM_003535,NM_001039111,NM_145901,NM_001111,NM_001077702	true	0.163144	0.0180689
response to radiation(GO:0009314)	422	948	NM_078467,NM_004217,NM_001030013,NM_001030015,NM_007254,NM_007289,NM_001037329,NM_014654,NM_172364,NM_004346,NM_004333,NM_018124,NM_004324,NM_001204303,NM_014736,NM_007122,NM_001267843,ENST00000392133,NM_018098,NM_001080394,NM_001114121,NM_001256214,NM_004041,NM_004073,NM_004075,NM_007349,NM_007327,NM_007300,NM_004111,NM_007314,NM_003012,NM_003013,NM_174895,NM_004164,NM_004171,NM_004172,NM_021920…	true	0.0546154	0.0181345
positive regulation of cyclase activity(GO:0031281)	48	103	NM_007102,NM_001278497,NM_006180,NM_001039966,NM_001204218,NM_020683,NM_182978,NM_000025,NM_000024,NM_000054,NM_000164,ENST00000394237,NM_000267,NM_000233,NM_006366,NM_006367,NM_001018065,NM_005184,NM_005459,NM_000603,NM_000620,NM_000625,NM_006888,NM_000677,NM_000675,NM_000676,NM_000684,NM_000794,NM_000798,NM_000823,NM_002903,NM_002880,NM_002737,NM_001957,NM_001042492,NM_002062,NM_001077489,NM_00…	true	-0.163213	0.0181654
respiratory burst(GO:0045730)	25	47	NM_007207,NM_004139,NM_007052,NM_172168,NM_013955,NM_005026,NM_018890,NM_000101,NM_000265,NM_000250,NM_000208,NM_000207,NM_000397,NM_000433,NM_000574,NM_000578,NM_006647,ENST00000390547,NM_002872,NM_002629,NM_002649,NM_001803,NM_144646,NM_001022,ENST00000378845	true	0.164773	0.0181924
negative regulation of transcription elongation from RNA polymerase II promoter(GO:0034244)	10	19	NM_004259,ENST00000420326,NM_000193,NM_001003716,NM_018453,NM_002904,NM_003958,NM_003168,NM_152617,NM_004456	true	0.203034	0.0182843
DNA ligation involved in DNA repair(GO:0051103)	5	24	NM_022550,NM_000234,NM_002128,NM_002129,NM_002312	true	0.229613	0.0182871
acute-phase response(GO:0006953)	44	122	NM_004244,NM_173843,NM_012448,NM_004364,NM_004139,NM_021805,NM_020525,NM_000963,NM_006512,NM_000934,NM_000132,NM_000242,NM_000207,NM_138938,NM_005194,NM_000331,NM_005143,NM_147199,NM_001002236,NM_021105,NM_054034,NM_000506,NM_000575,NM_000576,NM_000567,NM_000565,NM_000594,NM_000600,NM_000607,NM_000608,NM_030754,NM_001008387,NM_001639,NM_198719,NM_198714,NM_198715,NM_001127380,NM_003701,ENST000004…	true	0.139314	0.0183256
negative regulation of ERBB signaling pathway(GO:1901185)	47	120	ENST00000270460,NM_144949,NM_007096,NM_004068,NM_003026,NM_020972,NM_044472,NM_001039802,NM_012116,NM_001242837,NM_012305,NM_000021,NM_199421,NM_001024666,NM_018948,NM_018955,NM_005228,NM_005188,NM_001008530,NM_014203,NM_201282,NM_201283,NM_021009,NM_001098503,NM_021235,NM_199327,NM_032527,NM_032552,NM_031892,NM_005843,NM_005842,NM_002954,NM_002843,NM_002828,NM_001981,NM_001963,NM_138709,NM_19446…	true	-0.164436	0.0184483
BMP signaling pathway(GO:0030509)	108	247	NM_001271938,NM_004329,NM_007085,NM_013372,NM_173689,NM_013409,NM_007313,NM_003012,NM_003013,NM_003036,NM_173798,NM_001080500,NM_020648,NM_012242,NM_020634,NM_001010926,NM_001204088,NM_020429,ENST00000359999,NM_000020,NM_181886,NM_001105251,NM_001024630,NM_000118,NM_000138,NM_022469,NM_006313,NM_001164617,NM_005221,NM_001003652,NM_133468,ENST00000388995,NM_017617,NM_016269,NM_000522,NM_014209,NM_…	true	-0.110847	0.0185059
appendage development(GO:0048736)	147	274	NM_018083,NM_001271938,NM_001034852,NM_004324,NM_004329,NM_004318,NM_004380,NM_019885,ENST00000394967,NM_007353,NM_013435,NM_003030,NM_003013,NM_001174146,NM_003036,NM_021926,NM_021973,NM_001080458,NM_001032280,NM_006031,NM_006006,NM_172037,ENST00000373670,NM_024915,NM_012242,NM_000021,NM_001113347,NM_000095,NM_000965,NM_000966,NM_001024630,NM_006492,NM_017410,NM_017409,NM_000165,NM_000168,NM_000…	true	-0.0954189	0.0185312
limb development(GO:0060173)	147	274	NM_018083,NM_001271938,NM_001034852,NM_004324,NM_004329,NM_004318,NM_004380,NM_019885,ENST00000394967,NM_007353,NM_013435,NM_003030,NM_003013,NM_001174146,NM_003036,NM_021926,NM_021973,NM_001080458,NM_001032280,NM_006031,NM_006006,NM_172037,ENST00000373670,NM_024915,NM_012242,NM_000021,NM_001113347,NM_000095,NM_000965,NM_000966,NM_001024630,NM_006492,NM_017410,NM_017409,NM_000165,NM_000168,NM_000…	true	-0.0954189	0.0185312
glutamate biosynthetic process(GO:0006537)	8	13	NM_014905,NM_004172,NM_012084,NM_001256310,NM_170726,NM_001005783,NM_005271,NM_003748	true	-0.343642	0.0185456
digestive tract development(GO:0048565)	119	206	NM_173834,NM_018055,NM_001271938,NM_004360,NM_004316,NM_018190,NM_001136271,NM_003015,NM_003030,NM_003012,NM_003013,NM_020909,NM_020975,NM_021926,NM_021958,NM_021818,NM_020630,NM_012391,NM_001024847,NM_000022,NM_000090,NM_000965,NM_000916,NM_000168,NM_000193,NM_020335,NM_020375,NM_022553,NM_000222,NM_000209,NM_000210,NM_000213,NM_005270,NM_005269,NM_005250,NM_005257,NM_001287438,NM_000296,NM_0052…	true	-0.105664	0.018622
negative regulation of cellular response to growth factor stimulus(GO:0090288)	95	207	NM_014694,NM_007178,NM_003036,NM_012238,NM_012201,NM_001037802,NM_012342,NM_001024847,NM_000029,NM_020429,NM_018837,NM_000118,NM_000138,NM_018955,NM_198400,NM_006419,NM_006313,NM_001003652,NM_020182,NM_133493,NM_000379,NM_006221,NM_001002295,NM_000412,NM_017680,NM_000546,NM_018413,NM_005430,NM_005414,NM_030761,NM_005347,NM_021009,NM_014319,NM_000660,NM_013232,NM_014330,NM_030756,NM_001258024,NM_0…	true	-0.117787	0.0186353
blood vessel development(GO:0001568)	491	1090	NM_004235,NM_007217,NM_001030047,NM_018055,NM_018046,NM_012431,NM_014707,NM_052872,NM_004345,NM_004324,NM_007146,NM_014780,NM_057175,NM_001099412,NM_004390,NM_001122607,NM_001080391,NM_013372,NM_004093,NM_014909,NM_004054,NM_007300,NM_004118,NM_003028,NM_003012,NM_003013,NM_020996,NM_001257206,NM_004184,NM_021995,NM_001113756,NM_021973,NM_006167,NM_021935,NM_012082,NM_006113,NM_006105,NM_006121,N…	true	-0.0526468	0.0187802
cellular response to dsRNA(GO:0071359)	25	69	NM_001206491,NM_001037738,NM_134323,NM_012154,NM_020746,NM_198282,NM_001004317,NM_001003652,NM_001009881,NM_181708,NM_013235,NM_022720,NM_001195573,NM_005902,NM_005900,NM_001548,NM_024544,NM_024700,NM_024674,NM_138441,NM_002176,NM_003690,NM_002520,NM_003265,NM_001111	true	0.164278	0.0188188
DNA damage response, signal transduction by p53 class mediator(GO:0030330)	111	332	NM_078467,NM_014614,NM_004280,NM_014814,NM_004396,NM_001080391,NM_004064,NM_007349,NM_007300,NM_007366,NM_003068,NM_004159,NM_175932,NM_006096,NM_001278518,NM_012238,NM_001204186,NM_130438,NM_130436,NM_000051,NM_005047,NM_006503,NM_006497,NM_018955,NM_020382,NM_017495,NM_006388,NM_006399,NM_022457,NM_020197,NM_006263,NM_005178,NM_181784,NM_021627,NM_148976,NM_000474,NM_021127,NM_000489,NM_000546,…	true	-0.109011	0.0189279
cellular response to drug(GO:0035690)	51	105	NM_014634,NM_018047,NM_001037341,NM_004333,NM_004341,NM_173647,NM_014906,NM_003054,NM_006167,NM_172201,NM_001010887,NM_000944,NM_000238,NM_000218,NM_005228,NM_000373,NM_000320,NM_020125,NM_198207,NM_000507,NM_000546,NM_000537,NM_000576,NM_014391,NM_199165,NM_005612,NM_199292,NM_021132,NM_000863,NM_000820,NM_001503,NM_002982,NM_005954,NM_005953,NM_005933,NM_002703,NM_001964,NM_001955,NM_001197104,…	true	0.132118	0.0189744
synaptonemal complex organization(GO:0070193)	19	55	NM_004237,NM_012447,NM_006455,NM_014258,NM_001143764,NM_001105578,NM_001282718,NM_001282717,NM_001003811,NM_031275,NM_031271,NM_001040108,NM_001129979,NM_033025,NM_032132,NM_001123225,NM_003176,NM_004639,NM_003337	true	0.176052	0.019001
Schwann cell development(GO:0014044)	21	46	NM_019619,NM_014629,NM_003036,NM_001010980,NM_012237,NM_022474,NM_000267,NM_000261,NM_000426,NM_000454,NM_005604,NM_001014795,NM_001195573,NM_001626,NM_002699,NM_024577,NM_001184792,NM_001042492,NM_139284,NM_004935,NM_002292	true	-0.234116	0.0190318
negative regulation of viral entry into host cell(GO:0046597)	18	55	NM_007028,NM_012216,NM_005082,NM_006435,NM_021034,NM_000605,NM_006778,NM_030912,NM_030961,NM_002852,NM_001639,NM_003641,ENST00000368979,ENST00000366699,NM_033092,NM_145214,NM_003795,NM_003449	true	0.178298	0.019081
somatic motor neuron differentiation(GO:0021523)	5	6	NM_018941,NM_005169,NM_014564,NM_033343,NM_001082538	true	-0.403531	0.0191425
osteoblast proliferation(GO:0033687)	27	62	NM_001204375,NM_013372,NM_007313,NM_003012,NM_006157,NM_000908,NM_000633,NM_022970,NM_016085,NM_006665,NM_014587,NM_005902,NM_002759,NM_001664,NM_002673,NM_001554,NM_001191323,NM_138455,ENST00000359354,NM_001042762,NM_053001,NM_001135652,NM_001200,NM_002343,NM_002335,NM_002229,NM_002210	true	-0.209855	0.0191819
positive regulation of catabolic process(GO:0009896)	196	454	NM_014688,NM_014629,NM_001271943,NM_004286,NM_004324,NM_144949,NM_004322,NM_007126,NM_018190,NM_007162,NM_019884,NM_013325,NM_013354,NM_014853,NM_014924,NM_014912,NM_004064,NM_004052,NM_004073,NM_007308,NM_014991,NM_003099,NM_004152,NM_006105,NM_001172435,NM_006098,NM_012154,NM_012161,NM_012267,NM_012265,NM_012233,NM_012238,NM_012237,NM_012210,NM_172201,NM_005080,NM_000038,NM_000021,NM_005036,NM_…	true	-0.0824315	0.0192036
positive T cell selection(GO:0043368)	23	36	NM_004333,NM_144701,NM_006120,NM_000193,NM_006399,NM_000455,NM_000589,NM_000600,NM_000633,NM_000732,NM_016584,NM_002828,NM_138576,NM_080423,NM_002187,NM_004946,NM_001079,NM_002460,NM_003153,NM_003131,NM_153701,NM_153813,NM_002221	true	0.167525	0.0193506
axial mesoderm development(GO:0048318)	6	9	NM_018055,NM_020909,NM_005450,NM_031283,NM_003923,NM_004431	true	-0.378604	0.0194111
negative regulation of Wnt signaling pathway(GO:0030178)	120	293	NM_173849,NM_014604,NM_004360,NM_019884,NM_013372,NM_001206885,NM_004083,NM_003015,NM_003014,NM_020920,NM_003012,NM_003013,NM_003068,NM_004143,NM_020800,NM_006098,NM_001206998,NM_001080512,NM_001080508,NM_001256312,NM_001277053,NM_001242811,NM_001080824,NM_012242,NM_001270519,NM_005077,NM_005067,NM_000038,NM_021570,NM_006497,NM_000168,NM_022463,NM_000193,NM_006341,NM_001164617,NM_020248,ENST00000…	true	-0.104523	0.0194563
lipopolysaccharide-mediated signaling pathway(GO:0031663)	36	99	NM_004271,NM_001037499,NM_004139,NM_021805,NM_020529,NM_005007,NM_000952,NM_001164722,NM_006290,NM_005400,NM_000574,NM_000576,NM_000594,NM_000603,NM_000660,NM_005582,NM_021231,NM_005505,NM_002982,NM_015278,NM_025195,NM_002737,NM_015364,NM_001570,NM_001562,NM_001569,NM_182919,NM_138554,NM_033092,NM_003821,NM_003264,NM_002415,NM_002350,NM_002343,NM_178812,NM_001198	true	0.147416	0.0195699
entrainment of circadian clock by photoperiod(GO:0043153)	18	51	NM_004075,NM_012158,NM_173354,NM_005234,NM_021117,NM_001098482,NM_002896,NM_002709,NM_002710,NM_031492,NM_001008709,NM_002166,NM_003670,NM_033244,NM_033247,NM_033238,NM_002616,NM_004689	true	-0.248823	0.0195779
T cell mediated cytotoxicity(GO:0001913)	31	148	NM_004390,NM_004048,NM_144701,NM_001242758,NM_006505,NM_018950,NM_000247,NM_000410,NM_001098478,NM_006871,NM_000882,NM_021132,NM_005516,NM_005514,NM_002995,NM_016584,NM_002856,NM_001531,NM_001814,NM_001042724,NM_002116,NM_139011,NM_002127,NM_002187,NM_002185,M26429,NM_003824,NM_003764,NM_153701,NM_004580,NM_001185	true	-0.19684	0.0196023
regulation of autophagic vacuole assembly(GO:2000785)	8	18	NM_020773,NM_020775,NM_014169,NM_006913,NM_030981,NM_031296,NM_004637,NM_175605	true	-0.34127	0.0196837
appendage morphogenesis(GO:0035107)	128	224	NM_018083,NM_001271938,NM_004324,NM_004329,NM_004318,NM_004380,NM_019885,ENST00000394967,NM_007353,NM_003030,NM_003013,NM_001174146,NM_003036,NM_021926,NM_021973,NM_001080458,NM_001032280,NM_006031,NM_006006,NM_172037,NM_024915,NM_012242,NM_000021,NM_001113347,NM_000965,NM_000966,NM_001024630,NM_006492,NM_017409,NM_000165,NM_000168,NM_000193,NM_000192,NM_018951,NM_171999,NM_001164617,NM_006379,NM…	true	-0.101099	0.0197029
limb morphogenesis(GO:0035108)	128	224	NM_018083,NM_001271938,NM_004324,NM_004329,NM_004318,NM_004380,NM_019885,ENST00000394967,NM_007353,NM_003030,NM_003013,NM_001174146,NM_003036,NM_021926,NM_021973,NM_001080458,NM_001032280,NM_006031,NM_006006,NM_172037,NM_024915,NM_012242,NM_000021,NM_001113347,NM_000965,NM_000966,NM_001024630,NM_006492,NM_017409,NM_000165,NM_000168,NM_000193,NM_000192,NM_018951,NM_171999,NM_001164617,NM_006379,NM…	true	-0.101099	0.0197029
negative regulation of T cell activation(GO:0050868)	63	146	NM_004232,NM_007261,NM_007268,NM_004346,NM_144949,NM_004090,NM_004087,NM_003019,NM_144717,NM_173799,NM_021958,NM_001030288,NM_020651,NM_172140,NM_001024736,NM_000168,NM_000193,NM_000215,NM_005214,NM_014009,NM_000311,NM_001004354,NM_181780,NM_014143,NM_000418,NM_000417,NM_170662,NM_018440,NM_000572,NM_000589,NM_000605,NM_000660,NM_014452,NM_005512,NM_002995,NM_001454,NM_025239,NM_005874,NM_030571,…	true	-0.141944	0.0197855
desmosome organization(GO:0002934)	7	13	NM_007183,NM_003068,NM_002737,NM_022121,NM_004572,NM_002230,NM_004415	true	-0.357735	0.0198536
regulation of microtubule cytoskeleton organization(GO:0070507)	93	309	NM_004217,NM_001100119,NM_007186,NM_018098,NM_001114121,NM_014946,NM_004064,NM_007300,NM_004114,NM_007308,NM_014984,NM_144718,NM_044472,NM_001005207,NM_001037738,NM_020846,NM_001080429,NM_012155,NM_001039802,NM_012112,NM_012124,NM_007029,NM_024909,NM_001037954,NM_012237,NM_000038,NM_001190766,NM_170724,NM_006461,NM_017489,NM_006384,NM_147204,NM_005233,NM_018715,NM_001009944,NM_018451,NM_014264,NM…	true	0.105	0.0199581
response to type I interferon(GO:0034340)	79	229	NM_001206491,NM_001080391,NM_004031,NM_007355,NM_004120,NM_004159,NM_006187,NM_006147,NM_001242758,NM_006084,NM_020746,NM_007065,NM_006435,NM_017414,NM_018950,NM_017523,NM_001098627,NM_001005910,NM_005101,NM_016291,NM_021057,NM_021068,NM_001098478,NM_021034,NM_005419,NM_030776,NM_021002,NM_000605,NM_000629,NM_022873,NM_021231,NM_021133,NM_000874,NM_005533,NM_030961,NM_005514,NM_002827,NM_002828,N…	true	0.111943	0.019975
response to oxygen levels(GO:0070482)	228	484	NM_012448,NM_012474,NM_004322,NM_007117,NM_007122,NM_057159,NM_004380,NM_014862,NM_004064,NM_004052,NM_004073,NM_013438,NM_003018,NM_003012,NM_001178065,NM_003047,NM_020992,NM_173794,NM_004136,NM_021995,NM_021955,NM_006167,NM_006172,NM_006186,NM_006111,NM_134260,NM_001080436,NM_006096,NM_006079,NM_007052,NM_001135168,NM_001204218,NM_001278518,NM_012235,NM_012238,NM_012237,NM_012407,NM_013955,NM_1…	true	-0.0760019	0.0200505
regulation of hormone biosynthetic process(GO:0046885)	17	32	NM_000941,NM_000102,NM_021073,NM_030761,NM_005304,NM_005612,NM_000875,NM_023035,NM_001718,NM_001668,NM_015881,NM_003739,NM_003719,NM_003714,NM_001200,NM_181054,NM_033502	true	0.179926	0.0201558
oxygen homeostasis(GO:0032364)	5	17	NM_000032,NM_001024465,NM_058238,NM_022051,NM_181054	true	0.228304	0.0201653
[truncated: 440 more rows]

## Sheet: 005_signif_go_cell_component
#term	term_size	term_size_in_genome	annotated_genes	converged	lor	adj_pvalue
nuclear pore nuclear basket(GO:0044615)	5	10	NM_001278209,NM_006267,NM_005387,NM_016320,NM_003292	true	0.21772	0.0408796
condensed nuclear chromosome kinetochore(GO:0000778)	5	9	NM_006101,NM_031966,NM_001809,NM_001813,NM_001211	true	0.214284	0.0499015
Ndc80 complex(GO:0031262)	5	7	NM_006101,ENST00000592540,NM_020675,NM_182513,NM_145697	true	0.257423	0.00128278
[truncated: 3 more rows]

## Sheet: 005_signif_go_mol_function
#term	term_size	term_size_in_genome	annotated_genes	converged	lor	adj_pvalue
[truncated: 26 more rows]
