# Supplementary figures and images for: Impact of human milk on the transcriptomic response of fetal intestinal epithelial cells reveals expression changes of immune-related genes
Source: Royal Society of Chemistry journal article supplement (doi:10.1039/c8fo01107a), 2018-11-30

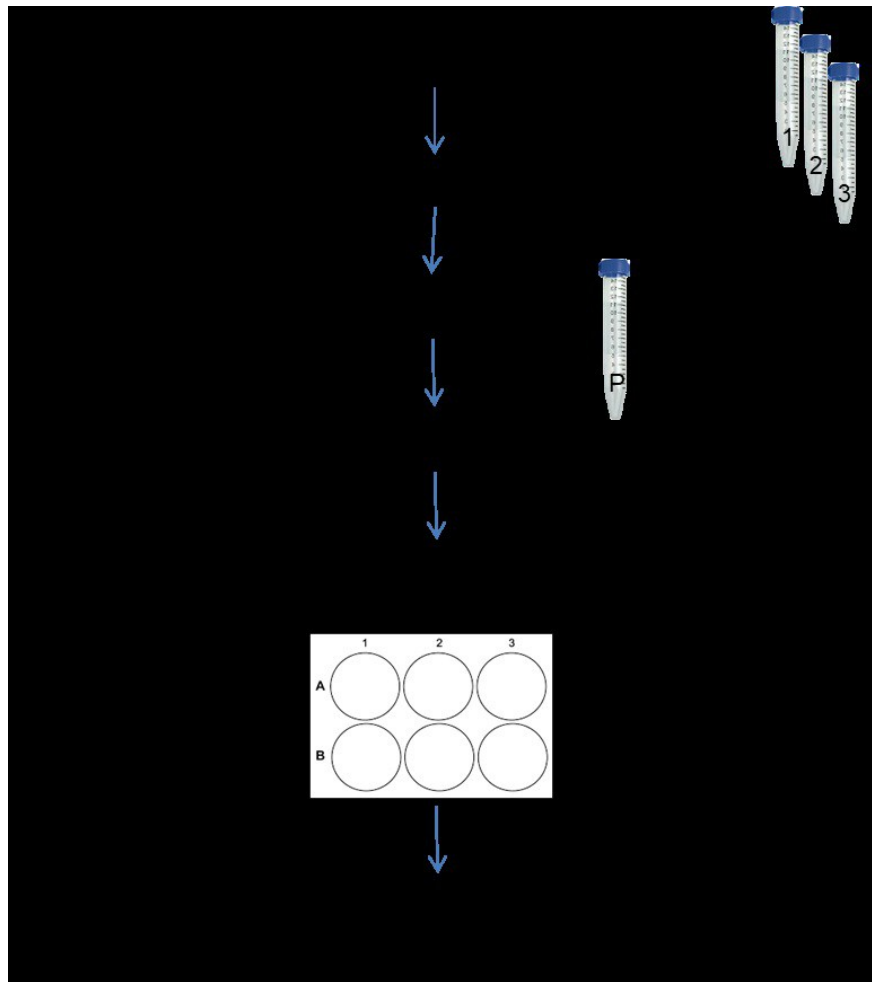

Supplement: c8fo01107a1.pdf [file c8fo01107a1.pdf]
